# Supplementary material for: Penetration of the Stigma and Style Elicits a Novel Transcriptome in Pollen Tubes, Pointing to Genes Critical for Growth in a Pistil
Source: PLoS Genet. 2009 Aug 28;5(8):e1000621. doi: 10.1371/journal.pgen.1000621 (PMC2726614; doi:10.1371/journal.pgen.1000621)
Supplement: Table S4 — Raw gene expression data for SIV PT. Normalized expression data (log2) for each replicate of dry pollen, 0.5 h PT, 4 h PT, SIV PT, and 25 selected experiments from publicly available sources; and statistical analyses for selected comparisons. (5.95 MB XLS) [file pgen.1000621.s009.xls]

## Sheet: SIV PT 3 replicates
sample ()*	sample ()*	AGI code	SIV PT-1_Signal	SIV PT-1_Detection	SIV PT-2_Signal	SIV PT-2_Detection	SIV PT-3_Signal	SIV PT-3_Detection	Descriptions
244901_at	244901_at	orf25	154.3	P	153.6	P	130	A	hypothetical protein
244902_at	244902_at	nad4L	89	A	117.4	A	92.4	A	NADH dehydrogenase subunit 4L
244903_at	244903_at	orf149	57.4	A	8	A	98.7	A	hypothetical protein
244904_at	244904_at	orf275	5.5	A	10.5	A	13.2	A	hypothetical protein
244905_at	244905_at	orf122c	11.2	A	10.9	A	14.7	A	hypothetical protein
244906_at	244906_at	orf240a	68.9	A	6.4	A	17.2	A	hypothetical protein
244907_at	244907_at	orf120	21.5	A	12.1	A	17.3	A	hypothetical protein
244908_at	244908_at	orf107d	4.7	A	6.1	A	4.8	A	hypothetical protein
244909_at	244909_at	orf100a	59	A	8.2	A	3.1	A	hypothetical protein
244910_s_at	244910_s_at	orf119	18.7	A	64.8	A	14.6	A	hypothetical protein
244911_at	244911_at	orf170	40	A	3	A	6.2	A	hypothetical protein
244912_at	244912_at	ccb382	118.2	A	181.4	A	193	A	cytochrome c biogenesis orf382 Protein sequence is in conflict with the conceptual translation
244913_at	244913_at	orf121b	57.1	A	26.8	A	13.2	A	hypothetical protein
244914_at	244914_at	orf107e	8.3	A	4	A	7.1	A	hypothetical protein
244915_s_at	244915_s_at	orf158	15.1	A	17.3	A	13	A	hypothetical protein
244916_at	244916_at	orf187	15.7	A	63.8	A	6.4	A	hypothetical protein
244917_at	244917_at	orf184	14.3	A	66	A	5	A	hypothetical protein
244918_at	244918_at	orf106d	6	A	36.5	A	4.3	A	hypothetical protein
244919_at	244919_at	ccb203	9.7	A	13.2	A	32	A	cytochrome c biogenesis orf203 Protein sequence is in conflict with the conceptual translation
244920_s_at	244920_s_at	nad3	11.2	A	192.4	M	207	P	NADH dehydrogenase subunit 3 Protein sequence is in conflict with the conceptual translation
244921_s_at	244921_s_at	orf114	28.4	A	62.3	A	68.4	A	hypothetical protein
244922_s_at	244922_s_at	orf118	10.3	A	110.7	A	2.7	A	hypothetical protein
244923_s_at	244923_s_at	orf135b	7.6	A	20	A	40.3	A	orf153b orf153b
244924_at	244924_at	orf107f	93.2	A	128.2	A	191.5	A	hypothetical protein
244925_at	244925_at	nad7	56.3	A	105.6	P	124.4	A	NADH dehydrogenase subunit 7
244926_s_at	244926_s_at	matR	3	A	7.9	A	4.8	A	maturase
244927_at	244927_at	orf109	78.4	A	12.4	A	8.9	A	hypothetical protein
244928_s_at	244928_s_at	orfX	115.7	A	180.7	P	95.2	P	hypothetical protein
244929_at	244929_at	nad4	311.8	A	312.1	P	360.5	P	NADH dehydrogenase subunit 4
244930_at	244930_at	orf106c	56	A	3.5	A	69.4	A	hypothetical protein
244931_at	244931_at	orf110b	47.3	A	74.6	A	33.2	A	hypothetical protein
244932_at	244932_at	psaC	163.6	M	599.4	P	455.7	P	PSI 9KDa protein
244933_at	244933_at	ndhE	190.5	P	545.5	P	593.3	P	NADH dehydrogenase ND4L
244934_at	244934_at	ndhG	91	A	430.6	P	488.3	P	NADH dehydrogenase ND6
244935_at	244935_at	ndhI	426.9	P	716.8	P	925.3	P	NADH dehydrogenase subunit
244936_at	244936_at	ndhA	71.3	A	274.4	P	272.1	P	NADH dehydrogenase ND1
244937_at	244937_at	ndhH	93.7	A	234	P	167.3	P	NADH dehydrogenase 49KDa protein
244938_at	244938_at	rps15	216.9	P	611.9	P	541.7	P	ribosomal protein S15
244939_at	244939_at	rps12.1	151.6	A	222.4	A	263.1	M	ribosomal protein S12 (trans-splice part 1 of 2)
244940_at	244940_at	rps12.2	460.9	P	494.5	P	575.3	P	ribosomal protein S12 (trans-splice part 2 of 2)
244941_at	244941_at	orf153a	52.9	A	57.5	A	29	A	hypothetical protein
244942_at	244942_at	orf131	12.6	A	21.7	A	11	A	hypothetical protein
244943_at	244943_at	nad9	76.3	A	115	A	121	A	NADH dehydrogenase subunit 9
244944_s_at	244944_s_at	rpl16.mitochondria	151.3	P	201.4	P	115.2	P	ribosomal protein L16
244945_at	244945_at	ccb206	3.5	A	86	A	171.2	A	cytochrome c biogenesis orf206
244946_at	244946_at	orf143	9.4	A	80.7	A	10.4	A	hypothetical protein
244947_at	244947_at	orf121a	35.8	A	91	A	75.1	A	hypothetical protein
244948_at	244948_at	orf167	7.4	A	5.7	A	11.6	A	hypothetical protein
244949_at	244949_at	orf116	4.7	A	14.1	A	13.9	A	hypothetical protein
244950_at	244950_at	cox2	390.9	P	206.7	P	256.7	A	cytochrome c oxidase subunit 2
244951_s_at	244951_s_at	ccb452	97	A	155.6	P	151.1	P	cytochrome c biogenesis orf452
244952_at	244952_at	orf101a	6.6	A	67.6	A	61	A	hypothetical protein
244953_s_at	244953_s_at	nad6	71.9	A	10.6	A	21.4	A	NADH dehydrogenase subunit 6
244954_s_at	244954_s_at	orf110a	5.1	A	2.5	A	22	A	hypothetical protein
244955_at	244955_at	orf127	4.1	A	12.2	A	10.8	A	hypothetical protein
244956_s_at	244956_s_at	orf154	55.5	A	106.1	A	90.5	A	hypothetical protein
244957_at	244957_at	orf157	67.8	A	27.4	A	45.4	A	hypothetical protein
244958_at	244958_at	orf106b	25.1	A	77.5	A	5.1	A	hypothetical protein
244959_s_at	244959_s_at	orf107c	35.9	A	95.6	P	63.5	A	hypothetical protein
244960_at	244960_at	rpl32	414.1	P	795.3	P	854.1	P	ribosomal protein L32
244961_at	244961_at	ycf5	835.6	P	1420.9	P	1410.2	P	hypothetical protein
244962_at	244962_at	ndhD	353.1	P	1066.6	P	1072.4	P	NADH dehydrogenase ND4
244963_at	244963_at	psbF	279.3	P	270.6	P	291.3	P	PSII cytochrome b559
244964_at	244964_at	psbE	109.5	P	182.8	P	221.9	P	PSII cytochrome b559
244965_at	244965_at	ORF31	254.5	P	308.2	P	389.1	P	hypothetical protein
244966_at	244966_at	petG	62.1	A	176.8	P	160.8	P	cytochrome b6-f complex, subunit V
244967_at	244967_at	psaJ	1086.8	P	877.6	P	2077.1	P	PSI J protein
244968_at	244968_at	rpl33	69.8	A	263.2	P	258.9	P	ribosomal protein L33
244969_at	244969_at	rps18	131.5	P	64.7	A	186.3	M	ribosomal protein S18
244970_at	244970_at	rpl20	234.2	P	472.5	P	557.2	P	ribosomal protein L20
244971_at	244971_at	clpP	1465.4	P	1308.4	P	1583.2	P	ATP-dependent protease subunit
244972_at	244972_at	psbB	42.3	A	108.2	A	127.3	A	PSII 47KDa protein
244973_at	244973_at	psbT	105.7	P	444.2	P	507	P	PSII T protein
244974_at	244974_at	psbN	56.1	A	324.9	P	227.5	P	PSII low MW protein
244975_at	244975_at	psbH	66	A	187.3	P	281.8	P	PSII 10KDa phosphoprotein
244976_at	244976_at	petB	477.7	P	631.8	P	757.6	P	cytochrome B6
244977_at	244977_at	petD	54.9	A	67.6	P	105.7	A	cytochrome b/f
244978_at	244978_at	rpoA	308.2	P	593.2	P	588.8	P	RNA polymerase alpha subunit
244979_at	244979_at	rps11	239	P	286	P	226.8	M	ribosomal protein S11
244980_at	244980_at	rpl36	149.7	P	475	P	459.4	P	ribosomal protein L36
244981_at	244981_at	rps8	111.1	A	264.7	P	301.8	P	ribosomal protein S8
244982_at	244982_at	rpl14	115.6	A	407.5	P	420	P	ribosomal protein L14
244983_at	244983_at	rpl16.chloroplast	76.3	A	160.7	P	225.8	P	ribosomal protein L16
244984_at	244984_at	rps3.chloroplast	314.9	P	775.3	P	942.4	P	ribosomal protein S3
244985_at	244985_at	rpl22	185.8	P	682.5	P	648.7	P	ribosomal protein L22
244986_at	244986_at	rps19	428.1	P	998.9	P	1256.1	P	ribosomal protein S19
244987_s_at	244987_s_at	rpl2.1_chloro	991.6	P	949.4	P	1101.3	P	ribosomal protein L2
244988_s_at	244988_s_at	rpl23.1	527.2	P	1192	P	1438.8	P	ribosomal protein L23
244989_s_at	244989_s_at	ycf2.1	40.3	M	83.2	A	129.6	P	hypothetical protein
244990_s_at	244990_s_at	orf77.1	85.5	P	430.2	P	356.3	P	hypothetical protein
244991_s_at	244991_s_at	ndhB.1	30.5	A	57.7	A	81.7	A	NADH dehydrogenase ND2
244992_s_at	244992_s_at	rps7.1_chloroplast	1456.4	P	2081.2	P	3100.1	P	ribosomal protein S7
244993_s_at	244993_s_at	ycf1.1	319.2	P	696.2	P	601.5	P	hypothetical protein
244994_at	244994_at	ndhF	36	A	184.3	P	113.4	P	NADH dehydrogenase ND5
244995_at	244995_at	atpI	41.8	A	146.8	P	168.7	P	ATPase a subunit
244996_at	244996_at	rps2	79.4	A	147.4	P	105.4	A	ribosomal protein S2
244997_at	244997_at	rpoC2	131.3	P	147.7	P	207.5	M	RNA polymerase beta subunit-2
244998_at	244998_at	rpoC1	168.2	P	236.9	P	211.7	P	RNA polymerase beta subunit-1
244999_at	244999_at	rpoB	18.2	A	11.5	A	14.5	A	RNA polymerase beta subunit
245000_at	245000_at	ycf6	205.3	P	314.8	P	399.3	P	hypothetical protein
245001_at	245001_at	psbM	698.7	P	775.9	P	1260.8	P	PSII low MW protein
245002_at	245002_at	psbD	16.8	A	61.9	A	109.3	A	PSII D2 protein
245003_at	245003_at	psbC	121.3	P	123.5	P	228.4	P	PSII 43 KDa protein
245004_at	245004_at	ycf9	250.2	P	484.9	P	514.6	P	hypothetical protein
245005_at	245005_at	rps14	132.9	P	209.8	A	221.9	P	ribosomal protein S14
245006_at	245006_at	psaB	530.5	P	662.5	P	819.1	P	PSI P700 apoprotein A2
245007_at	245007_at	psaA	5.6	A	84.3	A	150.6	P	PSI P700 apoprotein A1
245008_at	245008_at	ycf3	136.8	P	169.9	P	295.3	P	hypothetical protein
245009_at	245009_at	rps4.chloroplast	657.2	P	1097.5	P	1670	P	ribosomal protein S4
245010_at	245010_at	ndhJ	146.1	A	165.5	A	246.6	P	NADH dehydrogenase subunit
245011_at	245011_at	psbG	8.2	A	194.9	P	120.2	M	photosystem II G protein
245012_at	245012_at	ndhC	290.2	P	675.8	P	524.2	P	NADH dehydrogenase D3
245013_at	245013_at	atpE	1682.3	P	1364.2	P	1879.5	P	ATPase epsilon subunit
245014_at	245014_at	atpB	1304.3	P	1284.6	P	2587.1	P	ATPase beta subunit
245015_at	245015_at	rbcL	136.1	P	200.2	P	126.8	P	large subunit of riblose-1,5-bisphosphate carboxylase/oxygenase
245016_at	245016_at	accD	339.6	P	412	P	452.5	P	carboxytransferase beta subunit
245017_at	245017_at	psaI	388.4	P	553.6	P	618.5	P	PSI I protein
245018_at	245018_at	ycf4	114.2	P	285.7	P	373	P	hypothetical protein
245019_at	245019_at	ycf10_cemA	213.8	P	377.6	P	572.2	P	hypothetical protein
245020_at	245020_at	petA	304.2	P	575.8	P	717.7	P	cytochrome f
245021_at	245021_at	psbJ	150.7	P	234.2	P	268.8	P	PSII component
245022_at	245022_at	psbL	154.8	A	162.9	P	230.7	P	PSII L protein
245023_at	245023_at	psbI	328.2	P	471.4	P	804.1	P	PSII I protein
245024_at	245024_at	atpA	438.8	P	717.6	P	1191.8	P	ATPase alpha subunit
245025_at	245025_at	atpF	162.1	P	246.2	P	344.9	P	ATPase I subunit
245026_at	245026_at	atpH	134.7	A	222	A	237.2	P	ATPase III subunit
245027_at	245027_at	At2g26550	82.3	A	88.5	A	63.5	A	heme oxygenase 2 (HO2)
245028_at	245028_at	At2g26570	8257.6	P	8937.1	P	8481.1	P	unknown protein
245029_at	245029_at	At2g26580	31.1	A	7.8	A	12.9	A	hypothetical protein predicted by genscan
245030_at	245030_at	At2g26620	3.8	A	6	A	8.1	A	putative polygalacturonase
245031_at	245031_at	At2g26360	61.2	A	64.5	P	74.2	A	putative mitochondrial carrier protein
245032_at	245032_at	At2g26630	1059.7	P	345	P	408.7	P	En/Spm-like transposon protein related to En/Spm transposon family of maize
245033_at	245033_at	At2g26380	71.6	A	88.9	A	91.7	A	putative disease resistance protein
245034_at	245034_at	At2g26390	10.2	A	16.6	A	14.9	A	putative serpin
245035_at	245035_at	At2g26400	71.8	A	79	A	27	A	unknown protein similar to GP|2244827|gnl|PID|e326818|Z97336
245036_at	245036_at	At2g26410	31799.5	P	36823.4	P	33044.3	P	putative SF16 protein {Helianthus annuus}
245037_at	245037_at	At2g26420	65.5	A	52.3	A	5.5	A	putative phosphatidylinositol-4-phosphate 5-kinase
245038_at	245038_at	At2g26560	5	A	22.6	A	4	A	similar to latex allergen from Hevea brasiliensis ;supported by full-length cDNA: Ceres:1999.
245039_at	245039_at	At2g26600	31.6	A	69.9	A	56.2	A	putative beta-1,3-glucanase ;supported by full-length cDNA: Ceres:95083.
245040_at	245040_at	At2g26520	63.8	A	49.7	A	38.9	A	hypothetical protein predicted by genefinder;supported by full-length cDNA: Ceres:628.
245041_at	245041_at	At2g26530	64.8	A	34.2	A	147	A	AR781, similar to yeast pheromone receptor identical to GB:D88743, corrected a frameshift found in the original record (at 69530 bp), sequence submitted has been verified from 10 sequence electropherograms. The translation now starts from an upstream ATG.;supported by full-length cDNA: Ceres:33680
245042_at	245042_at	At2g26540	419.3	P	453.8	P	524.4	P	hypothetical protein predicted by genefinder;supported by full-length cDNA: Ceres:33364.
245043_at	245043_at	At2g26430	3265.8	P	3108.3	P	3083.5	P	putative cyclin ;supported by full-length cDNA: Ceres:22595.
245044_at	245044_at	At2g26500	95.8	A	99.8	A	160.7	A	unknown protein Alternative splice forms exist.;supported by full-length cDNA: Ceres:9368.
245045_at	245045_at	At2g26590	208.5	P	287.5	P	370	P	unknown protein similar to glycoprotein SP|Q16186|G100_HUMAN; supported by cDNA: gi_13926226_gb_AF372873.1_AF372873
245046_at	245046_at	At2g26510	80.5	A	178.3	A	168.9	A	putative membrane transporter ; supported by cDNA: gi_13877634_gb_AF370518.1_AF370518
245047_at	245047_at	psbA	174.1	A	112.8	A	219	A	PSII 32 KDa protein
245048_at	245048_at	matK	660.6	P	812.1	P	1127.8	P	orf within trnK intron orf within trnK intron
245049_at	245049_at	rps16	62.4	A	125.3	P	84	P	ribosomal protein S16
245050_at	245050_at	psbK	185.5	P	467.9	P	704.6	P	PSII K protein
245051_at	245051_at	At2g23320	3086.4	P	2435.1	P	2655.8	P	putative WRKY-type DNA-binding protein ; supported by cDNA: gi_13506742_gb_AF224704.1_AF224704
245052_at	245052_at	At2g26440	10.8	A	57.3	A	19	A	putative pectinesterase
245053_at	245053_at	At2g26450	47672.6	P	59294.6	P	50978.7	P	putative pectinesterase
245054_at	245054_at	At2g26460	526.8	P	651.5	P	762.4	P	unknown protein
245055_at	245055_at	At2g26470	418.4	P	499.7	P	515.6	P	hypothetical protein predicted by genscan; similar to SP|Q04471|YM04_YEAST
245056_at	245056_at	At2g26480	57.4	A	117.1	A	53	A	putative glucosyltransferase
245057_at	245057_at	At2g26490	22551.9	P	22351.1	P	22021.8	P	En/Spm-like transposon protein related to En/Spm transposon family of maize
245058_at	245058_at	At2g39790	2.9	A	12.8	A	71.3	A	hypothetical protein predicted by genefinder
245059_at	245059_at	At2g39720	2050.7	P	2477.4	P	2491.1	P	unknown protein ;supported by full-length cDNA: Ceres:253849.
245060_at	245060_at	At2g39770	7099.6	P	6751.2	P	7179.2	P	GDP-mannose pyrophosphorylase updated per Conklin PL et al, PNAS 1999, 96(7):4198-203;supported by full-length cDNA: Ceres:37775.
245061_at	245061_at	At2g39730	124	M	108.7	P	199.2	P	hypothetical protein ;supported by full-length cDNA: Ceres:7114.
245062_at	245062_at	At2g39760	4114.8	P	4555.7	P	4822.6	P	hypothetical protein predicted by genscan; similar to SP|P34568|YNV5_CAEEL;supported by full-length cDNA: Ceres:8256.
245063_at	245063_at	At2g39795	8.2	A	22.4	A	7.5	A	Expressed protein ; supported by full-length cDNA: Ceres: 39203.
245064_at	245064_at	At2g39725	351.2	P	368.9	P	429.1	P	Expressed protein ; supported by full-length cDNA: Ceres: 5605.
245065_at	245065_at	At2g39750	180.9	A	28	A	63.9	A	unknown protein ; supported by cDNA: gi_15450748_gb_AY053416.1_
245066_at	245066_at	At2g39840	218.3	P	210.4	P	309	P	putative serine/threonine protein phosphatase PP1 isozyme 4 (TOPP4) identical to GB:P48484; contains a Ser/Thr protein phosphatase signature (PDOC00115); contains a metallo-phosphoesterase motif (QDOC50185); supported by cDNA: gi_166800_gb_M93411.1_ATHPPHAC
245067_at	245067_at	At2g39780	6892.3	P	5777.8	P	5152.5	P	S-like ribonuclease RNS2 identical to ribonuclease 2 precursor SP:P42814, GI:289210; contains a ribonuclease T2 family histidine active site signature (PDOC00459); supported by cDNA: gi_289209_gb_M98336.1_ATHRNS2X
245068_at	245068_at	At2g23260	11.4	A	15.4	A	14.4	A	putative glucosyltransferase
245069_at	245069_at	At2g23250	56.1	A	35.6	A	12.1	A	putative glucosyltransferase
245070_at	245070_at	At2g23240	9	A	13.4	A	6.2	A	metallothionein-like protein identical to an EST: GB:X92116:ATECPRHOM; contains a vertebrate metallothionein signature (PS00203)
245071_at	245071_at	At2g23230	58.7	A	42.2	A	18.8	A	putative vetispiradiene synthase
245072_s_at	245072_s_at	At2g23220	57.7	A	78.4	A	77.9	A	putative cytochrome P450
245073_at	245073_at	At2g23210	32.4	A	139.6	A	83.7	A	putative glucosyltransferase
245074_at	245074_at	At2g23200	134.4	P	147.8	M	178.2	A	putative protein kinase contains a protein kinase domain profile (PDOC00100)
245075_at	245075_at	At2g23180	34.8	A	19	A	151.1	A	putative cytochrome P450
245076_at	245076_at	At2g23170	23.6	A	23.2	A	10.2	A	unknown protein
245077_at	245077_at	At2g23160	131.4	A	213.1	A	153.5	M	hypothetical protein predicted by genscan
245078_at	245078_at	At2g23340	2027.4	P	2102.2	P	1853.8	P	putative AP2 domain transcription factor
245079_at	245079_at	At2g23330	73.8	A	3.6	A	47.9	A	putative retroelement pol polyprotein
245080_at	245080_at	At2g23300	13.2	A	90.8	A	93.4	A	putative receptor-like protein kinase
245081_at	245081_at	At2g23280	99.4	A	94.6	A	33.1	A	unknown protein overlap with T20D16.8, in 3 region
245082_at	245082_at	At2g23270	27.5	A	28	A	23.4	A	hypothetical protein predicted by genefinder; similar to GP|2464853|gnl|PID|e353149|Z99707;supported by full-length cDNA: Ceres:40943.
245083_at	245083_at	At2g23310	470	P	553.3	P	571	P	putative integral membrane protein ;supported by full-length cDNA: Ceres:25204.
245084_at	245084_at	At2g23290	729	P	814.3	P	755.7	P	putative MYB family transcription factor ;supported by full-length cDNA: Ceres:40307.
245085_at	245085_at	At2g23350	367.5	P	186	P	226.1	P	putative poly(A) binding protein ; supported by cDNA: gi_15292850_gb_AY050859.1_
245086_at	245086_at	At2g39820	613.8	P	758.7	P	811.7	P	putative translation initiation factor
245087_at	245087_at	At2g39830	10.8	A	73.2	A	92.6	A	hypothetical protein predicted by genscan
245088_at	245088_at	At2g39850	19.6	A	54	A	73.4	A	subtilisin-like serine protease contains similarity to subtilisin-like protease C1 GI:13325079 from [Glycine max]
245089_at	245089_at	At2g45290	369.1	P	409.3	P	483.2	P	putative transketolase precursor ; supported by cDNA: gi_15982841_gb_AY057528.1_
245090_at	245090_at	At2g40900	140.2	A	136.7	A	82.3	A	putative integral membrane protein nodulin
245091_at	245091_at	At2g40910	6.8	A	3.2	A	3.8	A	unknown protein
245092_at	245092_at	At2g40950	18.5	A	9.6	A	76.7	A	putative TGACG-sequence-specific bZIP DNA-binding protein
245093_at	245093_at	At2g40820	24.2	A	6.9	A	5	A	hypothetical protein predicted by genscan
245094_at	245094_at	At2g40840	98.8	A	126	P	56.1	A	4-alpha-glucanotransferase
245095_at	245095_at	At2g40870	49.8	A	59.6	A	66.4	A	putative protein kinase contains a protein kinase domain profile (PDOC00100)
245096_at	245096_at	At2g40880	570.3	P	239.7	P	324.4	P	putative cysteine proteinase inhibitor B (cystatin B) ;supported by full-length cDNA: Ceres:11739.
245097_at	245097_at	At2g40935	11.3	A	6.6	A	21.2	A	Expressed protein ; supported by full-length cDNA: Ceres: 1297.
245098_at	245098_at	At2g40940	64.2	A	47.4	A	32.2	A	ethylene response sensor (ERS) identical to GB:U21952:ATU21952; supported by cDNA: gi_15450903_gb_AY054532.1_
245099_at	245099_at	At2g40830	13.3	A	28.4	A	4	A	unknown protein ; supported by cDNA: gi_3790582_gb_AF079180.1_AF079180
245100_at	245100_at	At2g40930	743.5	P	614.2	P	564.6	P	ubiquitin-specific protease 5 (UBP5), putative similar to GI:6648604; supported by cDNA: gi_6648603_gb_AF048705.1_AF048705
245101_at	245101_at	At2g40890	9.2	A	169.7	P	172.6	P	putative cytochrome P450 ; supported by cDNA: gi_15810181_gb_AY056105.1_
245102_at	245102_at	At2g41580	119.7	A	12.5	A	150	M	putative non-LTR retroelement reverse transcriptase
245103_at	245103_at	At2g41590	224.4	P	202	A	371.3	P	putative Ta11-like non-LTR retroelement protein similar to GB:AAA75253; some members of this protein family have a weak CCHC zinc fingers that is mostly from retroviral gag proteins (nucleocapsid)
245104_at	245104_at	At2g41600	122.7	A	25.8	A	5.7	A	hypothetical protein predicted by genefinder
245105_at	245105_at	At2g41610	31.5	A	78	A	78.1	A	hypothetical protein predicted by genscan
245106_at	245106_at	At2g41650	86.5	A	47.4	A	99.5	A	unknown protein
245107_at	245107_at	At2g41690	8.1	A	16.3	A	56.4	A	putative heat shock transcription factor
245108_at	245108_at	At2g41510	8.5	A	6.7	A	3	A	putative cytokinin oxidase
245109_at	245109_at	At2g41520	98.6	A	235.8	P	172.5	A	hypothetical protein predicted by genefinder; similar to EGAD|88596|96521
245110_at	245110_at	At2g41550	55.3	A	143.6	P	90	A	hypothetical protein predicted by genefinder
245111_at	245111_at	At2g41570	35.7	A	45.9	A	52.6	A	putative Ta11-like non-LTR retroelement protein similar to GB:AAA75253; some members of this protein family have a weak CCHC zinc fingers that is mostly from retroviral gag proteins (nucleocapsid)
245112_at	245112_at	At2g41540	35.2	A	27.9	A	25.8	A	glycerol-3-phosphate dehydrogenase ;supported by full-length cDNA: Ceres:105456.
245113_at	245113_at	At2g41660	4.1	A	10.8	A	12.2	A	hypothetical protein predicted by genefinder;supported by full-length cDNA: Ceres:35456.
245114_at	245114_at	At2g41630	11374.9	P	11426.2	P	11530.9	P	transcription factor IIB (TFIIB) identical to GB:P48512; contains a transcription factor TFIIB repeat signature (PDOC00624);supported by full-length cDNA: Ceres:2657.
245115_at	245115_at	At2g41530	157.9	A	293.6	A	327	A	putative esterase D ;supported by full-length cDNA: Ceres:37276.
245116_at	245116_at	At2g41620	545.4	P	718.3	P	691.9	P	unknown protein ; supported by cDNA: gi_14334431_gb_AY034907.1_
245117_at	245117_at	At2g41560	16.6	A	17	A	11.1	A	putative Ca2+-ATPase ; supported by cDNA: gi_11493642_gb_AF200739.1_AF200739
245118_at	245118_at	At2g41680	31.9	A	47.9	A	125.1	A	putative thioredoxin reductase The last 2 exons encode thioredoxin. There is an EST match to exons 5-7, and the distance between exon 7 and exon 8 is only 90bp. It is unlikely this is two separate genes, but more likely a hybrid protein.; supported by cDNA: gi_15912232_gb_AY056394.1_
245119_at	245119_at	At2g41640	791.8	P	1572.5	P	1137.3	P	unknown protein ; supported by cDNA: gi_16930450_gb_AF419579.1_AF419579
245120_at	245120_at	At2g39810	25	A	18.5	A	8.3	A	hypothetical protein predicted by genscan
245121_at	245121_at	At2g47610	557.3	P	341.6	P	368.4	P	60S ribosomal protein L7A ;supported by full-length cDNA: Ceres:6394.
245122_at	245122_at	At2g47420	114.8	A	96.2	A	134.7	A	putative dimethyladenosine transferase ; supported by cDNA: gi_14532649_gb_AY039949.1_
245123_at	245123_at	At2g47450	95.5	A	31.5	A	30.4	A	unknown protein ; supported by cDNA: gi_15215824_gb_AY050442.1_
245124_at	245124_at	At2g47580	339.3	P	251.1	P	166.2	A	small nuclear ribonucleoprotein U1A identical to GB:Z49991; supported by cDNA: gi_15450590_gb_AY052663.1_
245125_at	245125_at	At2g47430	24.6	A	69.2	A	65	A	putative histidine kinase identical to GB:D87545; supported by cDNA: gi_1679802_dbj_D87545.1_D87545
245126_at	245126_at	At2g47460	81.4	A	58.6	A	50.5	A	putative MYB family transcription factor ; supported by cDNA: gi_3941419_gb_AF062864.1_AF062864
245127_at	245127_at	At2g47600	1618.7	P	1063.4	P	933.9	P	putative Na+/Ca2+ antiporter ; supported by cDNA: gi_6492236_gb_AF109178.1_AF109178
245128_at	245128_at	At2g45380	94.2	A	39.1	A	1.6	A	unknown protein similar to gi2344899|AC002388
245129_at	245129_at	At2g45350	14.4	A	18.8	A	22.8	A	hypothetical protein predicted by genefinder and genscan; similar to gi2344896|AC002388 and gi2245038|gnl|PID|e327517|Z97342
245130_at	245130_at	At2g45340	9	A	8.5	A	6.4	A	putative receptor-like protein kinase
245131_s_at	245131_s_at	At2g45330	831.5	P	934.1	P	890.2	P	unknown protein
245132_at	245132_at	At2g45320	217.3	P	420.1	P	562	P	hypothetical protein predicted by genefinder
245133_at	245133_at	At2g45310	3403	P	3871.3	P	3085.3	P	putative nucleotide sugar epimerase
245134_s_at	245134_s_at	At2g45250	27.5	A	74.8	A	94.8	A	unknown protein
245135_at	245135_at	At2g45230	30.1	A	63.7	A	52.8	A	putative non-LTR retroelement reverse transcriptase
245136_at	245136_at	At2g45210	38.2	A	11.2	A	3.9	A	putative auxin-regulated protein
245137_at	245137_at	At2g45460	83.6	A	38.5	A	77.8	A	unknown protein
245138_at	245138_at	At2g45190	78.3	A	23.9	A	26.7	A	unknown protein predicted by genscan; supported by cDNA: gi_3822215_gb_AF074948.1_AF074948
245139_at	245139_at	At2g45430	10.1	A	83.6	A	155.4	P	putative AT-hook DNA-binding protein highly similar to hypothetical protein gi2245139:gnl:PID:e327087:Z97344
245140_at	245140_at	At2g45420	111.8	A	4.3	A	131.3	A	unknown protein predicted by genefinder and genscan; similar to gi2347197|AC002338
245141_at	245141_at	At2g45400	38.2	A	19	A	30.3	A	putative flavonol reductase
245142_at	245142_at	At2g45270	16.6	A	17.8	A	19.5	A	putative O-sialoglycoprotein endopeptidase ;supported by full-length cDNA: Ceres:112264.
245143_at	245143_at	At2g45450	322.9	P	444	P	551.8	P	unknown protein ;supported by full-length cDNA: Ceres:23203.
245144_at	245144_at	At2g45240	94.4	A	119	A	138.6	A	putative methionine aminopeptidase ;supported by full-length cDNA: Ceres:37621.
245145_at	245145_at	At2g45440	50.7	A	6.8	A	9	A	putative dihydrodipicolinate synthase ;supported by full-length cDNA: Ceres:26817.
245146_at	245146_at	At2g45200	314	P	442.1	P	284	P	putative cis-Golgi SNARE protein ; supported by cDNA: gi_13898894_gb_AF357529.1_AF357529
245147_at	245147_at	At2g45280	37.4	A	133.2	A	79.1	A	putative RAD51C-like DNA repair protein ; supported by cDNA: gi_15425730_dbj_AB062456.1_AB062456
245148_at	245148_at	At2g45220	6.5	A	40.7	A	5.9	A	putative pectinesterase ; supported by cDNA: gi_13605695_gb_AF361829.1_AF361829
245149_at	245149_at	At2g47620	166.7	A	78.8	A	137.5	A	putative SWI/SNF family transcription activator
245150_at	245150_at	At2g47590	69.8	A	3.9	A	85.6	A	photolyase/blue-light receptor (PHR2) ;supported by full-length cDNA: Ceres:34800.
245151_at	245151_at	At2g47550	128.5	M	392	P	206.3	P	putative pectinesterase ;supported by full-length cDNA: Ceres:111254.
245152_at	245152_at	At2g47490	5037.3	P	5228	P	5694.8	P	putative mitochondrial carrier protein similar to SP:P40556:YIA6_YEAST and SP:P39953:YEA6_YEAST;supported by full-length cDNA: Ceres:120306.
245153_at	245153_at	At5g12450	8.9	A	101.6	A	22.8	A	putative protein similarity to predicted proteins, Arabidopsis thaliana
245154_at	245154_at	At5g12460	56.6	A	116.3	A	142.1	P	putative protein similarity to predicted proteins
245155_at	245155_at	At5g12470	219.6	P	286.1	P	210.7	P	putative protein similarity to predicted proteins, Arabidopsis thaliana
245156_at	245156_at	At5g12480	58.3	A	11.2	A	12.8	A	calcium-dependent protein kinase-like protein strong similarity to calcium-dependent protein kinase 19, Arabidopsis thaliana, PIR:S71778~Contains EF-hand calcium-binding domain AA409-421;EF-hand calcium-binding domain AA445-457;EF-hand calcium-binding domain AA482-494;Protein kinases signatures and p
245157_at	245157_at	At2g33160	8.3	A	4.3	A	45.4	A	putative polygalacturonase
245158_at	245158_at	At2g33130	102	A	118.1	A	172	A	hypothetical protein predicted by genefinder
245159_at	245159_at	At2g33100	15902.2	P	16091.3	P	15263.8	P	putative cellulose synthase
245160_at	245160_at	At2g33080	5.5	A	10.2	A	42.3	A	putative leucine-rich repeat disease resistance protein
245161_at	245161_at	At2g33070	163	A	51.6	A	101.2	A	putative myrosinase binding protein
245162_at	245162_at	At2g33240	916.6	P	1035.1	P	921.9	P	putative myosin heavy chain
245163_at	245163_at	At2g33230	18.6	A	30.5	A	59.5	A	putative flavin-containing monooxygenase
245164_at	245164_at	At2g33210	94.6	A	130.4	A	194	A	mitochondrial chaperonin (HSP60)
245165_at	245165_at	At2g33180	8	A	14.3	A	60.3	A	unknown protein predicted by genscan
245166_at	245166_at	At2g33170	76.9	A	87.1	A	100.6	A	putative receptor-like protein kinase
245167_s_at	245167_s_at	At2g33120	1209.1	P	703.2	P	1004.6	P	putative synaptobrevin ;supported by full-length cDNA: Ceres:2443.
245168_at	245168_at	At2g33150	2613.7	P	2292.1	P	2282.7	P	3-ketoacyl-CoA thiolase ;supported by full-length cDNA: Ceres:36488.
245169_at	245169_at	At2g33220	557.2	P	864.7	P	896	P	unknown protein predicted by genefinder and 5 EST; supported by full-length cDNA: Ceres: 954.
245170_at	245170_at	At2g47570	75.5	A	48	A	24.5	A	60S ribosomal protein L18, 5 partial No ATG at the position for start codon
245171_at	245171_at	At2g47560	4.9	A	13.2	A	8.7	A	hypothetical protein predicted by genscan
245172_at	245172_at	At2g47540	65.1	A	21.4	A	63.9	A	hypothetical protein predicted by genscan and genefinder
245173_at	245173_at	At2g47520	5.4	A	10.6	A	124.7	A	putative AP2 domain transcription factor
245174_at	245174_at	At2g47500	83	A	59.4	A	5	A	putative kinesin heavy chain
245175_at	245175_at	At2g47470	844	P	771	P	892.2	P	putative protein disulfide-isomerase
245176_at	245176_at	At2g47440	599.1	P	1011.4	P	1111.3	P	unknown protein similar to GP|2104534|AF001308 (T10M13.11)
245177_at	245177_at	At5g12380	97.7	A	103	A	139	A	annexin-like protein genmodel supported by ESTs AV542769 and Av542175 in condradiction to N-terminal homology data from EMBL:AF188832, PIR:S56674, EMBL:MTANNEXIN~strong similarity to annexin, Fragaria x ananassa, EMBL:AF188832~Contains Annexins repeated domain signature AA198
245178_at	245178_at	At5g12390	10984.1	P	9372	P	8810	P	putative protein similarity to cDNA clones from human and mouse
245179_at	245179_at	At5g12400	695.8	A	1182.2	A	1111.7	A	putative protein similarity to predicted proteins, Arabidopsis thaliana
245180_at	245180_at	At5g12410	61.9	A	75.4	A	128.3	A	putative protein similarity to proteins of unknown function from human and mouse
245181_at	245181_at	At5g12420	28.4	A	47.7	A	71.4	A	putative protein similarity to various predicted proteins~Contains ATP synthase delta (OSCP) subunit signature AA211-230;Prokaryotic membrane lipoprotein lipid attachment site AA140-150
245182_at	245182_at	At5g12430	608.3	P	812.5	P	796.2	P	putative protein similarity to TETRATRICOPEPTIDE REPEAT PROTEIN 2 , human, SWISSPROT:TTC2_HUMAN~Contains dnaJ domains signatures and profile AA1108-1127
245183_at	245183_at	At5g12440	15.9	A	15.7	A	29.6	A	putative protein similarity to predicted proteins, Arabidopsis thaliana
245184_at	245184_at	At1g67790	33.8	A	7.8	A	6.8	A	F12A21.8 hypothetical protein
245185_at	245185_at	At1g67760	112.9	A	111.6	A	98.8	A	F12A21.11 similar to T-Complex protein 1, epsilon subunit sp|004450|TCPE_ARATH
245186_at	245186_at	At1g67710	10.8	A	15.1	A	18.3	A	F12A21.15 hypothetical protein
245187_s_at	245187_s_at	At1g67680	2180.2	P	2109.4	P	2019.7	P	F12A21.17 similar to signal recognition particle 72kD gi|5902124
245188_at	245188_at	At1g67660	116	A	100.9	A	7.5	A	F12A21.19 unknown protein; similar to ESTs gb|AI996033.1, and dbj|AV563431.1
245189_at	245189_at	At1g67670	3271.3	P	4293.2	P	4200.6	P	F12A21.18 hypothetical protein
245190_at	245190_at	At1g67690	84.3	A	80.8	A	90.9	A	F12A21.16 hypothetical protein
245191_at	245191_at	At1g67770	11.2	A	113.2	A	16	A	F12A21.10 similar to terminal ear1 gb|AAC39463.1
245192_at	245192_at	At1g67780	46.5	A	43.9	A	32.8	A	F12A21.9 hypothetical protein
245193_at	245193_at	At1g67810	2018.4	P	1346.4	P	857.9	P	F12A21.6 hypothetical protein
245194_at	245194_at	At1g67820	38.2	A	9.9	A	9.7	A	F12A21.5 similar to protein phosphatase 2C emb|CAA72341.1
245195_at	245195_at	At1g67740	78.7	P	183.2	P	173.9	A	F12A21.13 putative photosystem II Core Complex sp|049347|PSBY_ARATH; similar to ESTs gb|BE523181, dbj|AV531372.1, dbj|AV527826.1, dbj AV520274.1, dbj|AV522153.1, dbj|AV530317.1, dbj|AV526312.1, dbj|AV527090.1, dbj|AV521148.1, and dbj|AV531908.1;supported by full-l
245196_at	245196_at	At1g67750	110.2	A	39.6	A	82.9	A	F12A21.12 similar to pectate lyase like protein emb|CAB41931.1; similar to ESTs dbj|AV519656.1, and dbj|AV563083.1;supported by full-length cDNA: Ceres:94849.
245197_at	245197_at	At1g67800	142.2	P	170.4	P	151.8	A	F12A21.7 hypothetical protein;supported by full-length cDNA: Ceres:34552.
245198_at	245198_at	At1g67700	17.7	A	101.7	A	9.6	A	Expressed protein ; supported by full-length cDNA: Ceres: 19973.
245199_at	245199_at	At1g67730	164.1	P	200.8	P	258	P	Expressed protein ; supported by full-length cDNA: Ceres: 7434.
245200_at	245200_at	At1g67850	1463.9	P	1874.5	P	2046.6	P	F12A21.2 hypothetical protein; supported by cDNA: gi_14326581_gb_AF385745.1_AF385745
245201_at	245201_at	At1g67840	142.6	P	12.7	A	68.5	A	F12A21.3 unknown protein; similar to ESTs gb|AI995396.1, dbj|AV557393.1, and dbj|AV557055.1; supported by cDNA: gi_15146205_gb_AY049244.1_
245202_at	245202_at	At1g67720	91.1	A	92.4	A	4.3	A	F12A21.14 similar to receptor protein kinase-like protein emb|CAB45811.1; supported by cDNA: gi_16604632_gb_AY059761.1_ which likely contains two unspliced introns.
245203_at	245203_at	At3g33080	86.3	A	69.1	A	59.9	A	hypothetical protein similar to protein prospero GI:1346808 [Drosophila melanogaster]
245204_at	245204_at	At5g12270	18.3	A	24.9	A	9.9	A	1-AMINOCYCLOPROPANE-1-CARBOXYLATE OXIDASE-like protein similarity to ripening protein E8, tomato, PIR:S01642
245205_at	245205_at	At5g12280	157.8	P	181	A	162.2	A	putative protein similarity to splicing factor SF3a 120K chain, human, PIR:S60735
245206_at	245206_at	At5g12290	356.2	P	371.7	P	337.3	P	putative protein similarity to NCA2 protein, yeast, PIR:S54389~Contains Homeobox domain signature and profile AA305-328
245207_at	245207_at	At5g12310	890.4	P	764.6	P	768.8	P	RING finger-like protein similarity to predicted protein, Arabidopsis thaliana, AF361602~Contains Zinc finger, C3HC4 type (RING finger), signature AA61-70
245208_at	245208_at	At5g12330	32.4	A	11.5	A	47.5	A	lateral root primordia (LRP1)
245209_at	245209_at	At5g12340	59.7	A	56.7	P	38	A	putative protein similarity to predicted protein, Arabidopsis thaliana
245210_at	245210_at	At5g12350	101.9	A	29.2	A	62.7	A	putative protein similarity to UVB-resistance protein UVR8, Arabidopsis thaliana, PIR:T50662~Contains Regulator of chromosome condensation (RCC1) signatures AA300-310;Regulator of chromosome condensation (RCC1) signatures AA405-415;Regulator of chromosome condensation (RC
245211_at	245211_at	At5g12370	851.8	P	728.2	P	781.5	P	putative protein similarity to sec10, Drosophila melanogaster, AE003746~Contains Putative AMP-binding domain signature AA505-516
245212_at	245212_at	At1g44254	83.8	A	19.9	A	3	A	hypothetical protein predicted by genscan+
245213_at	245213_at	At1g44575	136	P	120.4	A	116.7	A	photosystem II 22kDa protein, putative similar to photosystem II 22kDa protein GI:21306 from [Spinacia oleracea]; supported by cDNA: gi_15294225_gb_AF410304.1_AF410304
245214_at	245214_at	At1g67855	4.8	A	58.3	A	42.2	A	F12A21.1 hypothetical protein
245215_at	245215_at	At1g67830	60.5	A	13.1	A	17	A	F12A21.4 similar to iEP4 gb|AAD11468.1
245216_at	245216_at	At4g16143	88.3	A	96.5	A	84.8	A	Expressed protein non-consensus GG donor splice site at exon 1 and 6; CT acceptor splice site at exon 2; supported by cDNA: gi:13605660
245217_at	245217_at	At1g38340	14.4	A	9.4	A	6.4	A	retroelement pol polyprotein, putative
245218_s_at	245218_s_at	At1g58842	10.5	A	50.4	A	18.9	A	viral resistance protein, putative, 5 partial similar to viral resistance protein GI:7110565 from [Arabidopsis thaliana]
245219_at	245219_at	At1g59124	78.2	A	31	A	126.3	A	viral resistance protein, putative similar to viral resistance protein GI:7110565 from [Arabidopsis thaliana]
245220_at	245220_at	At1g59171	3.6	A	35.5	A	5.7	A	hypothetical protein contains similarity to merozoite-piroplasm surface antigen Tams1
245221_s_at	245221_s_at	At1g59265	38.3	A	4.6	A	38.6	A	polyprotein, putative similar to polyprotein GI:4996365 from [Arabidopsis thaliana]
245222_at	245222_at	At3g29787	15.1	A	2.7	A	22	A	contains similarity to En/Spm transposon protein~gene_id:K17E7.3
245223_at	245223_at	At3g29791	22.3	A	74.5	A	11.9	A	gene_id:K17E7.5~unknown protein
245224_at	245224_at	At3g29796	27.3	A	15.3	A	100.3	A	gene_id:K17E7.8~unknown protein
245225_at	245225_at	At3g29800	15.5	A	23.4	A	5.6	A	mitochondrial protein-like; contains similarity to AAA-type ATPase gene_id:K17E7.100
245226_at	245226_at	At3g29970	103.4	A	15.4	A	70.2	A	gene_id:K17E7.15~unknown protein
245227_s_at	245227_s_at	At3g30140	22.1	A	6.7	A	57.1	A	gunknown protein contains non-consensus TG donor splice site at exon 1
245228_at	245228_at	At3g29810	62.8	A	81.4	P	60.8	A	phytochelatin synthetase-like protein gene_id:K17E7.120;supported by full-length cDNA: Ceres:98007.
245229_at	245229_at	At4g25620	69.3	A	79.5	A	137.3	P	putative protein contains EST gb:T4504800
245230_at	245230_at	At4g25610	1035.1	P	1389.8	P	1539.1	P	hypothetical protein Contains Zinc finger, C2H2 type, domain, [CEKCSREFCSPVNFRRHNRMH]00
245231_at	245231_at	At4g25600	116.1	A	11.9	A	10.7	A	hypothetical protein
245232_at	245232_at	At4g25590	22784.5	P	25438.8	P	22925.8	P	actin depolymerizing factor-like protein strong similarity to actin-depolymerizing factor, Brassica napus, PIR2:S30934~Contains Actin-depolymerizing proteins signature, [PDSSRVRMKMVYASSKDRFK]00
245233_at	245233_at	At4g25580	59.8	A	24.3	A	48.8	A	putative protein similarity to low-temperature-induced protein 65, Arabidopsis thaliana, PIR2:S30153~contains EST gb:W43419, W4351200
245234_at	245234_at	At4g25560	4.2	A	70.9	A	57	A	myb-like protein similarity to ATMYB4 - Arabidopsis thaliana~Contains Myb DNA-binding domain repeat signatures, Myb_1[WSPEEDEKL], Myb_2 [WSQIAKFLPGRTDNEIKNYWHSHL], ATP/GTP-binding site motif A (P-loop), [GLQRNGKS]00
245235_at	245235_at	At4g25550	179	P	125.1	M	215.9	A	putative protein similarity to predicted protein F43G9.5, Caenorhabditis elegans00
245236_at	245236_at	At4g25540	387.7	P	465.6	P	435.4	P	putative DNA mismatch repair protein similarity to DNA mismatch repair protein rep-3, Mus musculus, PIR2:JC4019~Contains DNA mismatch repair proteins mutS family signature, [SLVILDELGRGTSTHDG], ATP/GTP-binding site motif A (P-loop), [GPNMGGKS00
245237_at	245237_at	At4g25520	9.7	A	27.9	A	63.5	A	putative protein similarity to ALR - Homo sapiens~contains EST gb:Aa39558600
245238_at	245238_at	At4g25570	30.7	A	30.4	A	128.6	A	putative protein similarity to cytochrome b561, Homo sapiens, PIR2:S53321~contains EST gb:AA720180, R65413, T46072, AA728528, T04182, T04807, Z37601, F19849, T8828200;supported by full-length cDNA: Ceres:15975.
245239_at	245239_at	At4g25530	103.3	A	11.8	A	39.5	A	putative homeodomain-protein similarity to homeodomain protein AHDP, Arabidopsis thaliana00; supported by cDNA: gi_13506819_gb_AF243535.1_AF243535
245240_at	245240_at	At1g44510	13.5	A	74.7	A	21.1	A	polyprotein, putative similar to polyprotein GI:4996367 from [Arabidopsis thaliana]
245241_at	245241_at	At1g44478	8.3	A	10.2	A	4.4	A	hypothetical protein contains similarity to protein kinase GI:571458 from [Gallus gallus]
245242_at	245242_at	At1g44446	52.5	A	92.1	A	9.7	A	chlorophyll a oxygenase identical to chlorophyll a oxygenase GI:5853117 from [Arabidopsis thaliana]; supported by cDNA: gi_5478806_dbj_AB021316.1_AB021316
245243_at	245243_at	At1g44414	48.3	A	80	A	117.2	A	hypothetical protein predicted by genemark.hmm
245244_at	245244_at	At1g44350	132.1	A	132.9	A	108	A	IAA-amino acid hydrolase, putative similar to IAA-amino acid hydrolase GI:3421384 from [Arabidopsis thaliana]
245245_at	245245_at	At1g44318	62.1	A	106.4	A	99	A	delta-aminolevulinic acid dehydratase (Alad), putative similar to delta-aminolevulinic acid dehydratase (Alad) GI:493019 from [Glycine max]
245246_at	245246_at	At1g44222	29.8	A	10	A	6.7	A	hypothetical protein predicted by genemark.hmm
245247_at	245247_at	At4g17230	32.1	A	33.6	A	84.8	A	scarecrow-like 13 (SCL13) ; supported by cDNA: gi_16930432_gb_AF419570.1_AF419570
245248_at	245248_at	At4g15415	2325.1	P	3734.3	P	3525.2	P	Expressed protein ; supported by cDNA: gi_2160693_gb_U73528.1_ATU73528
245249_at	245249_at	At4g16760	3659.1	P	2869.9	P	2874.3	P	acyl-CoA oxidase like protein ; supported by cDNA: gi_3044213_gb_AF057044.1_AF057044
245250_at	245250_at	At4g17490	103.7	A	141.4	A	20.6	A	ethylene responsive element binding factor-like protein (AtERF6) ; supported by cDNA: gi_3298497_dbj_AB013301.1_AB013301
245251_at	245251_at	At4g17615	1860	P	2858.9	P	2968.9	P	calcineurin B-like protein 1 ; supported by cDNA: gi_3309081_gb_AF076251.1_AF076251
245252_at	245252_at	At4g17500	69.1	A	23.9	A	95.4	A	ethylene responsive element binding factor 1 (frameshift !) ; supported by cDNA: gi_3434966_dbj_AB008103.1_AB008103
245253_at	245253_at	At4g15440	9.3	A	26.4	A	69	A	hydroperoxide lyase (HPOL) like protein ; supported by cDNA: gi_3822402_gb_AF087932.1_AF087932
245254_at	245254_at	At4g14680	64.5	A	120.1	A	92.3	A	ATP-sulfurylase ; supported by cDNA: gi_459143_gb_U06275.1_ATU06275
245255_at	245255_at	At4g14110	929.3	P	488.2	A	451.7	P	COP9 protein ; supported by cDNA: gi_530869_gb_L32874.1_ATHCOP9A
245256_at	245256_at	At4g15090	125.1	A	67.4	A	18.9	A	Expressed protein ; supported by cDNA: gi_5764394_gb_AF159587.1_AF159587
245257_at	245257_at	At4g14640	77.4	A	8.8	A	3.4	A	calmodulin ; supported by cDNA: gi_5825599_gb_AF178074.1_AF178074
245258_at	245258_at	At4g15340	2.4	A	13.1	A	6.1	A	lupeol synthase like protein ; supported by cDNA: gi_6650207_gb_AF062513.1_AF062513
245259_at	245259_at	At4g14150	355	P	283.4	P	205.4	P	kinesin like protein ; supported by cDNA: gi_8745332_gb_AF193767.1_AF193767
245260_at	245260_at	At4g16360	71.1	A	75.9	A	103	A	kinase like protein ; supported by cDNA: gi_13430671_gb_AF360248.1_AF360248
245261_at	245261_at	At4g14385	758.2	P	655.6	P	739.9	P	Expressed protein ; supported by cDNA: gi_13877886_gb_AF370206.1_AF370206
245262_at	245262_at	At4g16563	3.8	A	49.8	A	3.6	A	predicted protein ; supported by cDNA: gi_15809799_gb_AY054167.1_
245263_at	245263_at	At4g17740	178.1	M	163.1	A	214	P	PSII D1 protein processing enzyme ; supported by cDNA: gi_15809807_gb_AY054171.1_
245264_at	245264_at	At4g17245	3.4	A	11.6	A	51.9	A	Expressed protein ; supported by cDNA: gi_15809953_gb_AY054245.1_
245265_at	245265_at	At4g14400	27	A	37.6	A	68.6	A	hypothetical protein ; supported by cDNA: gi_15810232_gb_AY056155.1_
245266_at	245266_at	At4g17070	601.6	P	615.6	P	567.6	P	hypothetical protein ; supported by cDNA: gi_15912320_gb_AY056438.1_
245267_at	245267_at	At4g14060	9	A	68.4	A	84.9	A	major latex protein like ; supported by cDNA: gi_15982831_gb_AY057523.1_
245268_at	245268_at	At4g16570	16.7	A	30	A	169.9	A	hypothetical protein ; supported by cDNA: gi_15983409_gb_AF424579.1_AF424579
245269_at	245269_at	At4g14500	3048.3	P	2965.6	P	2678.5	P	hypothetical protein ; supported by cDNA: gi_16226250_gb_AF428283.1_AF428283
245270_at	245270_at	At4g14960	21033.7	P	26913.7	P	26666.1	P	tubulin alpha-6 chain (TUA6) ; supported by cDNA: gi_16226461_gb_AF428406.1_AF428406
245271_at	245271_at	At4g16430	198.3	P	190.4	P	205.2	P	transcription factor like protein ; supported by cDNA: gi_16226918_gb_AF428368.1_AF428368
245272_at	245272_at	At4g17250	8.5	A	47.6	A	8.4	A	hypothetical protein ; supported by cDNA: gi_16323154_gb_AY057681.1_
245273_at	245273_at	At4g14950	1007.5	P	1693.3	P	1600	P	hypothetical protein ; supported by cDNA: gi_16604570_gb_AY059730.1_
245274_at	245274_at	At4g14360	993.3	P	394.8	P	503.3	P	ankyrin like protein ; supported by cDNA: gi_16604604_gb_AY059747.1_
245275_at	245275_at	At4g15210	65.9	A	14.8	A	7.7	A	beta-amylase ; supported by cDNA: gi_166601_gb_M73467.1_ATHAMYB
245276_at	245276_at	At4g16780	7	A	12.3	A	14.6	A	DNA-binding homeotic protein Athb-2 ; supported by cDNA: gi_166751_gb_M90394.1_ATHHOMEOA
245277_at	245277_at	At4g15550	14.4	A	59.2	A	60.9	A	glucosyltransferase like protein ; supported by cDNA: gi_2149126_gb_U81293.1_ATU81293
245278_at	245278_at	At4g17730	620.1	P	616	P	386.1	P	syntaxin ; supported by cDNA: gi_2149379_gb_U85036.1_ATU85036
245279_at	245279_at	At4g17270	261.5	P	475.9	P	689.8	P	putative protein ; supported by cDNA: gi_14190518_gb_AF380659.1_AF380659
245280_at	245280_at	At4g16845	311.7	P	280.3	P	281.7	P	Expressed protein ; supported by cDNA: gi_14334421_gb_AY034902.1_
245281_at	245281_at	At4g15560	133.9	A	137	A	66.4	A	DEF (CLA1) protein ; supported by cDNA: gi_14334451_gb_AY034917.1_
245282_at	245282_at	At4g14990	164.3	P	136.2	A	96.5	A	hypothetical protein ; supported by cDNA: gi_14334731_gb_AY035039.1_
245283_at	245283_at	At4g13980	326.6	P	392.9	P	418.9	P	Expressed protein ; supported by cDNA: gi_14517386_gb_AY039528.1_
245284_at	245284_at	At4g14210	24.5	A	10.4	A	69.9	A	phytoene dehydrogenase precursor (phytoene desaturase) ; supported by cDNA: gi_14532765_gb_AY040007.1_
245285_s_at	245285_s_at	At4g14040	112.7	A	64.7	A	113.1	A	selenium-binding protein like ; supported by cDNA: gi_14532843_gb_AY040046.1_
245286_at	245286_at	At4g14880	352.9	P	615.9	P	518.3	P	cytosolic O-acetylserine(thiol)lyase (EC 4.2.99.8) ; supported by cDNA: gi_15027936_gb_AY045825.1_
245287_at	245287_at	At4g14910	39	A	42	A	6.1	A	imidazoleglycerol-phosphate dehydratase ; supported by cDNA: gi_15081689_gb_AY048237.1_
245288_at	245288_at	At4g16420	526.2	P	435.6	P	405.4	P	transcriptional adaptor like protein ; supported by cDNA: gi_15215639_gb_AY050348.1_
245289_at	245289_at	At4g15470	11166.2	P	10490.6	P	9764	P	Expressed protein ; supported by cDNA: gi_15215826_gb_AY050443.1_
245290_at	245290_at	At4g16490	74.5	A	51.3	A	80.8	A	hypothetical protein ; supported by cDNA: gi_15292862_gb_AY050865.1_
245291_at	245291_at	At4g16155	61.2	A	143.5	A	141.6	A	Expressed protein ; supported by cDNA: gi_15292886_gb_AY050877.1_
245292_at	245292_at	At4g15093	19515.7	P	20546.8	P	18522.4	P	Expressed protein ; supported by cDNA: gi_15293028_gb_AY050948.1_
245293_at	245293_at	At4g16660	1356.8	P	1571.8	P	1645.2	P	HSP like protein ; supported by cDNA: gi_15293148_gb_AY051008.1_
245294_at	245294_at	At4g14340	113.3	A	93	A	38	A	casein kinase I ; supported by cDNA: gi_15450524_gb_AY052364.1_
245295_at	245295_at	At4g16100	1976.1	P	1598.1	P	1580.5	P	hypothetical protein ; supported by cDNA: gi_15450995_gb_AY054578.1_
245296_at	245296_at	At4g16370	6.5	A	4.9	A	17.1	A	isp4 like protein ; supported by cDNA: gi_15451019_gb_AY054590.1_
245297_at	245297_at	At4g16510	560	P	721.2	P	785.8	P	hypothetical protein ; supported by cDNA: gi_15451033_gb_AY054597.1_
245298_at	245298_at	At4g15010	398.2	P	270.2	P	373.8	P	hypothetical protein ; supported by cDNA: gi_15451217_gb_AY054689.1_
245299_at	245299_at	At4g17530	3163.2	P	2058.6	P	2425.5	P	ras-related small GTP-binding protein RAB1c ; supported by cDNA: gi_15529160_gb_AY052204.1_
245300_at	245300_at	At4g16350	63.2	A	44.4	A	17.9	A	hypothetical protein ; supported by cDNA: gi_11065942_gb_AF192884.1_AF192884
245301_at	245301_at	At4g17190	13	A	2.4	A	89.9	P	farnesyl-pyrophosphate synthetase FPS2 ; supported by cDNA: gi_1146162_gb_L46349.1_ATHFPS2R
245302_at	245302_at	At4g17695	4.4	A	16	A	13.7	A	Expressed protein ; supported by cDNA: gi_15723596_gb_AY048690.1_
245303_at	245303_at	At4g17010	223.2	P	155.5	P	115.2	P	hypothetical protein ; supported by full-length cDNA: Ceres: 91870.
245304_at	245304_at	At4g15630	111.5	M	156.7	P	97.7	A	hypothetical protein ; supported by full-length cDNA: Ceres: 933.
245305_at	245305_at	At4g17215	71	A	94	P	33.5	A	Expressed protein ; supported by full-length cDNA: Ceres: 94923.
245306_at	245306_at	At4g14690	65.6	A	139.8	A	30.2	A	Expressed protein ; supported by full-length cDNA: Ceres: 95834.
245307_at	245307_at	At4g16770	34.2	A	15.8	A	34.1	A	gibberellin oxidase-like protein non-consensus GG acceptor splice site at exon 8; supported by cDNA: gi_13265536_gb_AF324704.2_AF324704
245308_at	245308_at	At4g17486	1946.8	P	1504.6	P	1479.6	P	putative protein ; supported by cDNA: gi_13358188_gb_AF324997.2_AF324997
245309_at	245309_at	At4g15140	156.1	P	456.8	P	322.9	P	putative protein ; supported by cDNA: gi_13926241_gb_AF372879.1_AF372879
245310_at	245310_at	At4g13950	34.4	A	3.8	A	2.4	A	hypothetical protein ;supported by full-length cDNA: Ceres:17977.
245311_at	245311_at	At4g14320	190.1	A	25.9	A	113.2	A	ribosomal protein ; supported by full-length cDNA: Ceres: 18153.
245312_at	245312_at	At4g14600	133.2	P	93.2	A	53.7	A	Expressed protein ; supported by full-length cDNA: Ceres: 20129.
245313_at	245313_at	At4g15420	1607.6	P	2300.7	P	3177.5	P	UFD1 like protein ; supported by full-length cDNA: Ceres: 207652.
245314_at	245314_at	At4g16745	2429.3	P	3757.3	P	3471.3	P	Expressed protein ; supported by full-length cDNA: Ceres: 22084.
245315_at	245315_at	At4g14800	77.6	A	104.9	A	98.4	A	proteasome chain protein ; supported by full-length cDNA: Ceres: 24266.
245316_at	245316_at	At4g14000	60.9	A	154.6	A	107.3	A	hypothetical protein ;supported by full-length cDNA: Ceres:25991.
245317_at	245317_at	At4g15610	337.2	P	348.5	P	228.2	P	hypothetical protein ; supported by full-length cDNA: Ceres: 26019.
245318_at	245318_at	At4g16985	52.7	A	61.4	A	120	A	Expressed protein ; supported by full-length cDNA: Ceres: 30087.
245319_at	245319_at	At4g16146	90.8	P	184.1	P	92.1	P	Expressed protein ; supported by full-length cDNA: Ceres: 30227.
245320_at	245320_at	At4g16444	1120.4	P	837.8	P	741	P	Expressed protein ; supported by full-length cDNA: Ceres: 30471.
245321_at	245321_at	At4g15545	3.8	A	107	A	89.1	A	Expressed protein ; supported by full-length cDNA: Ceres: 307.
245322_at	245322_at	At4g14815	5.3	A	101.3	A	6.9	A	Expressed protein ; supported by full-length cDNA: Ceres: 31856.
245323_at	245323_at	At4g16500	2399.5	P	1492.8	P	1744.8	P	cysteine proteinase inhibitor like protein ; supported by full-length cDNA: Ceres: 31946.
245324_at	245324_at	At4g17260	105.8	P	152.1	A	290.8	P	lactate dehydrogenase (LDH1) ;supported by full-length cDNA: Ceres:33509.
245325_at	245325_at	At4g14130	89.1	A	26.4	A	7.1	A	xyloglucan endotransglycosylase-related protein XTR-7 ;supported by full-length cDNA: Ceres:33554.
245326_at	245326_at	At4g14100	61.9	A	21.5	A	27.9	A	Expressed protein ; supported by full-length cDNA: Ceres: 34967.
245327_at	245327_at	At4g16850	15.6	A	110.9	A	15.3	A	hypothetical protein ; supported by full-length cDNA: Ceres: 35772.
245328_at	245328_at	At4g14465	41.1	A	109.5	A	16.8	A	Expressed protein ; supported by full-length cDNA: Ceres: 36844.
245329_at	245329_at	At4g14365	202.8	P	315.3	P	163.8	P	Expressed protein ; supported by full-length cDNA: Ceres: 37809.
245330_at	245330_at	At4g14930	111.5	A	155.4	P	131.1	A	hypothetical protein ;supported by full-length cDNA: Ceres:38042.
245331_at	245331_at	At4g14410	2219.1	P	2680.6	P	2437.4	P	hypothetical protein ;supported by full-length cDNA: Ceres:40736.
245332_at	245332_at	At4g15940	2411.6	P	2597.5	P	2820.6	P	isomerase like protein ;supported by full-length cDNA: Ceres:40913.
245333_at	245333_at	At4g14615	1080.5	P	1355.6	P	1159.4	P	Expressed protein ; supported by full-length cDNA: Ceres: 42223.
245334_at	245334_at	At4g15800	89.7	A	219.8	P	189.3	P	Expressed protein ; supported by full-length cDNA: Ceres: 5455.
245335_at	245335_at	At4g16160	64.7	A	31.8	A	13.1	A	pore protein homolog ;supported by full-length cDNA: Ceres:5714.
245336_at	245336_at	At4g16515	77.4	A	39.6	A	27.9	A	Expressed protein ; supported by full-length cDNA: Ceres: 6580.
245337_at	245337_at	At4g16566	445.6	P	688	P	534.4	P	Expressed protein ; supported by full-length cDNA: Ceres: 7101.
245338_at	245338_at	At4g16442	27.6	A	39	A	8.1	A	Expressed protein ; supported by full-length cDNA: Ceres: 7632.
245339_at	245339_at	At4g16120	19.4	A	7.9	A	12.6	A	hypothetical protein ;supported by full-length cDNA: Ceres:17019.
245340_at	245340_at	At4g14420	179.8	P	189.1	P	135.8	P	elicitor like protein ; supported by full-length cDNA: Ceres: 1718.
245341_at	245341_at	At4g16447	55.9	A	10.5	A	6.5	A	Expressed protein ; supported by full-length cDNA: Ceres: 17535.
245342_at	245342_at	At4g16720	187.8	P	229.2	P	142.3	P	ribosomal protein ;supported by full-length cDNA: Ceres:23771.
245343_at	245343_at	At4g15830	1249.5	P	2445.9	P	2084.7	P	hypothetical protein ;supported by full-length cDNA: Ceres:39757.
245344_at	245344_at	At4g15475	203.8	P	299.5	P	176.9	P	F-box protein family, AtFBL4 contains similarity to grr1 GI:2407790 from [Glycine max];supported by full-length cDNA: Ceres:100411.
245345_at	245345_at	At4g16640	53.5	A	18.4	A	137.2	A	proteinase like protein ;supported by full-length cDNA: Ceres:14136.
245346_at	245346_at	At4g17090	93.1	A	64.7	A	90.7	A	putative beta-amylase ;supported by full-length cDNA: Ceres:36882.
245347_at	245347_at	At4g14890	4.4	A	60.7	A	67.4	A	ferredoxin ;supported by full-length cDNA: Ceres:22861.
245348_at	245348_at	At4g17770	24.9	A	21.8	A	11.6	A	trehalose-6-phosphate synthase like protein ;supported by full-length cDNA: Ceres:95947.
245349_at	245349_at	At4g16690	68	A	34.1	A	102.4	A	cyanohydrin lyase like protein ;supported by full-length cDNA: Ceres:5546.
245350_at	245350_at	At4g16830	53.3	A	21.7	A	15	A	nuclear antigen homolog ;supported by full-length cDNA: Ceres:118826.
245351_at	245351_at	At4g17640	4494.8	P	4759.9	P	4833.7	P	casein kinase II beta chain CKB2 ;supported by full-length cDNA: Ceres:19505.
245352_at	245352_at	At4g15490	13.5	A	13.3	A	31.4	A	indole-3-acetate beta-glucosyltransferase like protein ;supported by full-length cDNA: Ceres:35383.
245353_at	245353_at	At4g16000	10	A	15.3	A	9.4	A	hypothetical protein ;supported by full-length cDNA: Ceres:9209.
245354_at	245354_at	At4g17600	21	A	60.8	A	44	A	Lil3 protein ;supported by full-length cDNA: Ceres:29150.
245355_at	245355_at	At4g17390	1227.5	P	1281.2	P	1093.4	P	60S ribosomal protein L15 homolog ;supported by full-length cDNA: Ceres:31538.
245356_at	245356_at	At4g13940	1019.8	P	750.9	P	706.6	P	adenosylhomocysteinase ;supported by full-length cDNA: Ceres:16846.
245357_at	245357_at	At4g17560	133.3	P	98.8	A	66.6	A	putative protein ;supported by full-length cDNA: Ceres:2161.
245358_at	245358_at	At4g15900	136.3	P	207.7	P	177.2	P	PRL1 protein ;supported by full-length cDNA: Ceres:123113.
245359_at	245359_at	At4g14430	685.2	P	1195	P	1453.1	P	carnitine racemase like protein ;supported by full-length cDNA: Ceres:28978.
245360_at	245360_at	At4g16330	92.8	A	4.6	A	87.7	A	naringenin 3-dioxygenase like protein ;supported by full-length cDNA: Ceres:40793.
245361_at	245361_at	At4g17790	4858.9	P	5290	P	4489.2	P	hypothetical protein ;supported by full-length cDNA: Ceres:42815.
245362_at	245362_at	At4g17460	5.5	A	6.8	A	9	A	homeobox-leucine zipper protein HAT1 (hd-zip protein 1) ;supported by full-length cDNA: Ceres:34167.
245363_at	245363_at	At4g15120	2437.7	P	2305.4	P	2005.1	P	hypothetical protein ;supported by full-length cDNA: Ceres:36129.
245364_at	245364_at	At4g15790	9.4	A	12.8	A	8.5	A	hypothetical protein ;supported by full-length cDNA: Ceres:22637.
245365_at	245365_at	At4g17720	3110.8	P	3312	P	3234.1	P	hypothetical protein ;supported by full-length cDNA: Ceres:39922.
245366_at	245366_at	At4g14965	16.1	A	33.6	A	29.1	A	Expressed protein ; supported by full-length cDNA: Ceres: 10518.
245367_at	245367_at	At4g16265	36.2	A	17.1	A	5.2	A	Expressed protein ; supported by full-length cDNA: Ceres: 12256.
245368_at	245368_at	At4g15510	36.6	A	26.1	A	91.7	P	hypothetical protein ; supported by full-length cDNA: Ceres: 12451.
245369_at	245369_at	At4g15975	18.2	A	82.7	A	55.7	A	Expressed protein ; supported by full-length cDNA: Ceres: 124835.
245370_at	245370_at	At4g16840	94.3	P	5.9	A	100.4	M	Expressed protein ; supported by full-length cDNA: Ceres: 14223.
245371_at	245371_at	At4g15750	159.2	P	65.1	P	94.7	A	hypothetical protein ;supported by full-length cDNA: Ceres:14485.
245372_at	245372_at	At4g15000	109.3	A	113.8	M	143.9	A	ribosomal protein ;supported by full-length cDNA: Ceres:15384.
245373_s_at	245373_s_at	At4g14716	2090.7	P	1093.3	P	1191.7	P	Expressed protein ; supported by full-length cDNA: Ceres: 16319.
245374_at	245374_at	At4g17620	553.5	P	323.6	P	410.2	P	hypothetical protein
245375_at	245375_at	At4g17660	4.9	A	52.1	A	62.8	A	NAK like protein kinase
245376_at	245376_at	At4g17690	264.3	P	144.1	P	238.5	P	peroxidase like protein
245377_at	245377_at	At4g17700	98.4	A	96.2	A	124.8	A	hypothetical protein
245378_at	245378_at	At4g17710	10.9	A	95.3	A	67	A	GLABRA2 like protein
245379_at	245379_at	At4g17750	400.3	P	307.1	P	375	P	heat shock transcription factor HSF1
245380_at	245380_at	At4g17760	175.8	P	16.1	A	4.6	A	hypothetical protein
245381_at	245381_at	At4g17785	47.6	A	6.4	A	50.4	A	MYB transcription factor like protein
245382_at	245382_at	At4g17800	81.6	A	64.6	A	90.9	A	hypothetical protein
245383_at	245383_at	At4g17810	16.6	A	94.5	A	110.4	A	SUPERMAN like protein
245384_at	245384_at	At4g16790	57.3	A	52.1	A	88.5	A	glycoprotein homolog ;supported by full-length cDNA: Ceres:255542.
245385_at	245385_at	At4g14020	13.1	A	88.6	A	31.2	A	hypothetical protein ;supported by full-length cDNA: Ceres:13520.
245386_at	245386_at	At4g14010	10.3	A	7.4	A	4	A	hypothetical protein ;supported by full-length cDNA: Ceres:7346.
245387_at	245387_at	At4g17520	68.1	A	110.6	A	28.7	A	nuclear RNA binding protein A-like protein ;supported by full-length cDNA: Ceres:35156.
245388_at	245388_at	At4g16410	79.4	A	97.5	A	108	A	hypothetical protein ;supported by full-length cDNA: Ceres:2505.
245389_at	245389_at	At4g17480	9.1	A	81	A	84.4	A	putative protein ;supported by full-length cDNA: Ceres:253398.
245390_at	245390_at	At4g17650	937.6	P	1376.3	P	1342.2	P	putative protein ;supported by full-length cDNA: Ceres:39872.
245391_at	245391_at	At4g16520	114	M	146.9	M	76.1	A	symbiosis-related like protein ;supported by full-length cDNA: Ceres:17851.
245392_at	245392_at	At4g15680	10.6	A	36.7	A	119	A	glutaredoxin ;supported by full-length cDNA: Ceres:32219.
245393_at	245393_at	At4g16260	60.4	A	47.7	A	77.1	A	beta-1,3-glucanase class I precursor ;supported by full-length cDNA: Ceres:3176.
245394_at	245394_at	At4g16450	585.4	P	377.5	P	480.4	P	hypothetical protein ;supported by full-length cDNA: Ceres:16090.
245395_at	245395_at	At4g17420	276.5	P	329.9	P	395.1	P	hypothetical protein ;supported by full-length cDNA: Ceres:26448.
245396_at	245396_at	At4g14870	41.7	A	49.9	A	7.3	A	hypothetical protein ;supported by full-length cDNA: Ceres:30327.
245397_at	245397_at	At4g14560	28.9	A	23	A	31.3	A	auxin-responsive protein IAA1 ;supported by full-length cDNA: Ceres:33860.
245398_at	245398_at	At4g14900	5.4	A	16.6	A	6.6	A	hydroxyproline-rich glycoprotein homolog ;supported by full-length cDNA: Ceres:25333.
245399_at	245399_at	At4g17340	4.3	A	7	A	38.9	A	membrane channel like protein ;supported by full-length cDNA: Ceres:99796.
245400_at	245400_at	At4g17040	12.6	A	86.9	A	71.9	A	ATP-dependent Clp protease proteolytic subunit (ClpR4), putative similar to ATP-dependent Clp protease proteolytic subunit GI:7264063 from [Synechococcus sp.PCC 7942];supported by full-length cDNA: Ceres:36017.
245401_at	245401_at	At4g17670	269.8	P	220	P	227.8	P	hypothetical protein ;supported by full-length cDNA: Ceres:6709.
245402_at	245402_at	At4g17585	112.7	P	98	M	94.3	P	putative protein
245403_at	245403_at	At4g17590	31.8	A	29.4	A	45.1	A	putative protein
245404_at	245404_at	At4g17610	3.3	A	7.1	A	18.7	A	putative protein
245405_at	245405_at	At4g17150	5.4	A	17.8	A	11	A	hypothetical protein
245406_at	245406_at	At4g17160	124.8	P	54	A	121	P	GTP-binding RAB2A like protein
245407_at	245407_at	At4g17170	13536.6	P	15608.6	P	16938.8	P	GTP-binding RAB2A like protein
245408_at	245408_at	At4g17180	139.7	A	146.3	P	230.6	P	putative protein
245409_at	245409_at	At4g17200	74	A	77.1	A	68.7	A	putative protein
245410_at	245410_at	At4g17220	36.3	A	12.3	A	17.7	A	putative protein
245411_at	245411_at	At4g17240	3.4	A	30.9	A	24.1	A	hypothetical protein
245412_at	245412_at	At4g17280	5.6	A	7.2	A	9.7	A	hypothetical protein
245413_at	245413_at	At4g17300	7.8	A	62.5	A	8.3	A	asparagine--tRNA ligase
245414_at	245414_at	At4g17310	13.1	A	20.4	A	127.6	A	hypothetical protein
245415_at	245415_at	At4g17330	809.1	P	844.5	P	853.7	P	G2484-1 protein
245416_at	245416_at	At4g17350	311.2	P	458	P	508	P	putative protein
245417_at	245417_at	At4g17360	462.4	P	691.6	P	725.4	P	phosphoribosylglycinamide formyltransferase-like protein
245418_at	245418_at	At4g17370	100.1	A	106.5	A	96.5	A	putative protein
245419_at	245419_at	At4g17380	3.9	A	15	A	28.6	A	putative protein
245420_at	245420_at	At4g17410	245	A	255	A	234.4	A	hypothetical protein
245421_at	245421_at	At4g17430	9.4	A	27.3	A	13.1	A	hypothetical protein
245422_at	245422_at	At4g17470	42.9	A	56.7	A	8.7	A	putative protein
245423_at	245423_at	At4g17483	10697.6	P	10271.4	P	10626.9	P	putative protein
245424_at	245424_at	At4g17505	19.6	A	58	A	5.3	A	putative protein
245425_at	245425_at	At4g17510	1026.5	P	817.4	P	854.3	P	carboxyl-terminal proteinase like protein
245426_at	245426_at	At4g17540	74.2	A	23.3	A	46.7	A	hypothetical protein
245427_at	245427_at	At4g17550	7279.4	P	5726.8	P	6485.2	P	putative protein
245428_at	245428_at	At4g17570	37.1	A	45.1	A	10.5	A	putative protein
245429_at	245429_at	At4g17580	784.4	P	196.3	A	223.6	P	Bax inhibitor-1-like protein
245430_at	245430_at	At4g17060	863.7	P	1053	P	852.4	P	hypothetical protein
245431_at	245431_at	At4g17080	575	P	436	P	373.3	P	hypothetical protein
245432_at	245432_at	At4g17100	434.6	P	312	P	256.8	P	putative serine protease-like protein
245433_at	245433_at	At4g17110	74	P	115.7	A	132.2	A	hypothetical protein
245434_at	245434_at	At4g17120	39.9	A	133.6	P	108.7	A	hypothetical protein
245435_at	245435_at	At4g17130	13.1	A	6.7	A	73.7	A	hypothetical protein
245436_at	245436_at	At4g16620	44.4	A	109.7	A	17.4	A	membrane protein homolog
245437_at	245437_at	At4g16630	20.3	A	47.2	A	11.2	A	RNA helicase like protein
245438_at	245438_at	At4g16650	37	A	3.3	A	42	A	growth regulator like protein
245439_at	245439_at	At4g16670	143.4	P	94	A	111.4	A	hypothetical protein
245440_at	245440_at	At4g16680	329.2	P	246.5	P	349.7	P	RNA helicase
245441_at	245441_at	At4g16700	130.1	A	54.7	A	128.3	A	decarboxylase like protein
245442_at	245442_at	At4g16710	9.4	A	9.2	A	3.9	A	hypothetical protein
245443_at	245443_at	At4g16730	4.8	A	10.1	A	12.8	A	limonene cyclase like protein
245444_at	245444_at	At4g16740	26.5	A	39.8	A	58.8	A	limonene cyclase like protein
245445_at	245445_at	At4g16750	3.6	A	29.3	A	3.4	A	apetala2 domain TINY like protein
245446_at	245446_at	At4g16800	37	A	85.8	P	86.1	A	enoyl-CoA hydratase
245447_at	245447_at	At4g16820	29.2	A	88.9	A	95.1	A	triacylglycerol lipase like protein
245448_at	245448_at	At4g16860	376.9	P	1106.6	P	1125.9	P	disease resistance RPP5 like protein
245449_at	245449_at	At4g16870	33.4	A	16.6	A	155.1	A	retrotransposon like protein
245450_at	245450_at	At4g16880	41.3	A	65.7	P	95.6	P	disease resistance RPP5 like protein (fragment)
245451_at	245451_at	At4g16890	53.5	M	54.6	A	30.1	A	disease resistance RPP5 like protein
245452_at	245452_at	At4g16910	69.3	A	54.8	A	3	A	retrotransposon like protein
245453_at	245453_at	At4g16900	68	A	38.4	A	13.3	A	disease resistance RPP5 like protein
245454_at	245454_at	At4g16920	210.3	P	161	P	140.9	P	disease resistance RPP5 like protein
245455_at	245455_at	At4g16930	6.6	A	46.6	A	50.5	A	disease resistance RPP5 like protein (fragment)
245456_at	245456_at	At4g16950	437.5	P	390.2	P	403.6	P	disease resistance RPP5 like protein
245457_s_at	245457_s_at	At4g16960	259.4	P	737.2	P	398.5	P	disease resistance RPP5 like protein
245458_at	245458_at	At4g16970	73.8	A	117.9	A	106.7	A	kinase like protein
245459_at	245459_at	At4g16980	12.3	A	8.5	A	33.1	A	hypothetical protein
245460_at	245460_at	At4g16990	39.8	A	50.7	A	62.1	A	disease resistance RPP5 like protein (fragment)
245461_at	245461_at	At4g17000	15.4	A	15.6	A	28.1	A	hypothetical protein
245462_at	245462_at	At4g17020	73.6	A	32.3	A	122.3	A	transcription factor like protein
245463_at	245463_at	At4g17030	28.7	A	7.5	A	148.8	P	allergen like protein
245464_at	245464_at	At4g17050	97.4	A	3.4	A	95.9	P	hypothetical protein
245465_at	245465_at	At4g16590	53.1	A	15.1	A	32.7	A	cellulose synthase like protein
245466_at	245466_at	At4g16600	156.5	P	224.1	P	198.6	P	glucosyltransferase like protein
245467_at	245467_at	At4g16610	52.3	A	13.7	A	37.2	A	hypothetical protein
245468_at	245468_at	At4g15980	829.3	P	820.4	P	695.1	P	pectinesterase like protein
245469_at	245469_at	At4g16010	6.6	A	19.1	A	49.6	A	reverse transcriptase like protein
245470_at	245470_at	At4g16020	6	A	9.7	A	4.7	A	retrotransposon like protein
245471_at	245471_at	At4g16030	63.2	A	80.9	A	12.9	A	probable ribosomal protein
245472_at	245472_at	At4g16040	59.7	A	11.7	A	111	P	hypothetical protein
245473_at	245473_at	At4g16050	8.1	A	3.1	A	11.9	A	hypothetical protein
245474_at	245474_at	At4g16060	114	A	16.4	A	122.4	A	hypothetical protein
245475_at	245475_at	At4g16080	134.5	A	178.4	A	94.3	A	hypothetical protein
245476_at	245476_at	At4g16090	5	A	15.2	A	24.6	A	hypothetical protein
245477_at	245477_at	At4g16110	681.8	P	657.3	P	646.4	P	hypothetical protein
245478_at	245478_at	At4g16130	24.3	A	103.1	A	61.8	A	galactokinase like protein
245479_at	245479_at	At4g16140	77.2	A	73.3	A	119.1	P	extensin like protein
245480_at	245480_at	At4g16150	242.4	P	394.6	P	266.5	M	transcription factor like protein
245481_at	245481_at	At4g16170	114.7	P	62.2	A	19	A	hypothetical protein
245482_at	245482_at	At4g16180	29.3	A	16	A	4.6	A	hypothetical protein
245483_at	245483_at	At4g16190	87.6	A	17.4	A	49.9	A	cysteine proteinase contains similarity to papain-like cysteine proteinase isoform I GI:7381219 from [Ipomoea batatas]
245484_at	245484_at	At4g16210	232	P	181	P	265.7	P	enoyl-CoA hydratase like protein
245485_at	245485_at	At4g16230	71	A	143	A	118.7	A	proline-rich, APG like protein
245486_x_at	245486_x_at	At4g16240	23	A	156.9	A	22.3	A	glycine-rich protein homolog
245487_at	245487_at	At4g16250	40.6	A	67.5	A	7.7	A	phytochrome D
245488_at	245488_at	At4g16270	16.7	A	27.4	A	108.2	A	peroxidase like protein
245489_at	245489_at	At4g16280	563.4	P	434.7	P	474	P	FCA gamma protein
245490_at	245490_at	At4g16310	76.2	A	39.8	A	103	A	hypothetical protein
245491_at	245491_at	At4g16320	144.6	A	167.1	P	110.8	P	hypothetical protein
245492_at	245492_at	At4g16340	74	A	37.1	A	11.5	A	putative protein
245493_at	245493_at	At4g16380	37.5	A	100.3	P	21.6	A	hypothetical protein
245494_at	245494_at	At4g16390	7.5	A	93.2	P	74.2	A	salt-inducible protein homolog
245495_at	245495_at	At4g16400	94.1	A	56.8	A	41.5	A	hypothetical protein
245496_at	245496_at	At4g16440	218.3	A	305.3	M	199.6	M	LET1 like protein
245497_at	245497_at	At4g16460	258.1	P	68.3	A	170.3	A	hypothetical protein
245498_at	245498_at	At4g16470	136.7	P	205.2	P	268.4	P	hypothetical protein
245499_at	245499_at	At4g16480	29299.6	P	36941.9	P	32344.2	P	membrane transporter like protein
245500_at	245500_at	At4g15590	6.4	A	20.1	A	6.7	A	reverse transcriptase like protein
245501_at	245501_at	At4g15620	4.2	A	5.2	A	6.8	A	hypothetical protein
245502_at	245502_at	At4g15640	9.5	A	60.9	A	16.2	A	hypothetical protein
245503_at	245503_at	At4g15650	21678.2	P	21597.9	P	22872.6	P	kinase like protein
245504_at	245504_at	At4g15660	46.9	A	16.7	A	81.6	A	glutaredoxin
245505_at	245505_at	At4g15690	12.6	A	8.2	A	13.2	A	glutaredoxin
245506_at	245506_at	At4g15700	30.7	A	2.5	A	1.7	A	glutaredoxin homolog
245507_at	245507_at	At4g15710	14.8	A	17.2	A	8.2	A	hypothetical protein
245508_at	245508_at	At4g15720	11.3	A	3.6	A	85.3	A	hypothetical protein
245509_at	245509_at	At4g15730	319.6	P	236.9	P	184.8	P	hypothetical protein
245510_at	245510_at	At4g15740	547.3	P	731.7	P	728.6	P	hypothetical protein
245511_at	245511_at	At4g15760	51.7	A	29.7	A	22.6	A	hypothetical protein
245512_at	245512_at	At4g15770	70.7	A	58.7	A	109.2	A	hypothetical protein
245513_at	245513_at	At4g15780	5.7	A	76.3	A	102.1	A	SYBL1 like protein
245514_at	245514_at	At4g15805	73.3	A	28.5	A	42.8	A	OEP8 like protein
245515_at	245515_at	At4g15810	7.4	A	7.8	A	37.9	A	hypothetical protein
245516_at	245516_at	At4g15820	4.2	A	21.8	A	73.3	A	hypothetical protein
245517_at	245517_at	At4g15840	342.1	P	176.3	A	303.5	P	hypothetical protein
245518_at	245518_at	At4g15850	57.6	A	100.7	A	113.2	P	ATP-dependent RNA helicase like protein
245519_at	245519_at	At4g15860	17.7	A	4.1	A	4.4	A	retrotransposon like protein
245520_at	245520_at	At4g15870	43.7	A	57.1	A	10	A	delta-cadinene synthase like protein
245521_at	245521_at	At4g15880	576.9	P	381.2	P	565.1	P	Expressed protein ;supported by cDNA: gi:14423393
245522_at	245522_at	At4g15890	561.1	P	396.2	P	348	P	hypothetical protein
245523_at	245523_at	At4g15910	170.3	P	109.1	P	43.1	A	drought-induced protein like
245524_at	245524_at	At4g15920	96.1	A	64.7	A	18.6	A	cytochrome c oxidoreductase like protein
245525_at	245525_at	At4g15930	45.8	A	62.7	A	85.3	A	dynein light chain like protein
245526_at	245526_at	At4g15950	64.5	A	90.2	A	110.6	A	putative protein
245527_at	245527_at	At4g15960	128	A	9.7	A	15.4	A	putative epoxide hydrolase
245528_at	245528_at	At4g15530	6968.1	P	4205.7	P	4223.3	P	pyruvate,orthophosphate dikinase
245529_at	245529_at	At4g15570	70.6	A	31.7	A	71.5	A	SEN1 like protein
245530_at	245530_at	At4g15580	8.6	A	64.3	A	83.1	A	splicing factor like protein
245531_at	245531_at	At4g15100	65.2	A	45.1	A	71.9	A	hydroxynitrile lyase like protein
245532_at	245532_at	At4g15110	157.3	P	136	P	183.6	A	cytochrome P450 like protein
245533_at	245533_at	At4g15130	5405.7	P	5127.6	P	5563.8	P	putative phosphocholine cytidylyltransferase
245534_at	245534_at	At4g15150	7.3	A	4.9	A	44	A	hypothetical protein
245535_at	245535_at	At4g15160	65.4	A	51.8	A	44.4	A	cell wall protein like
245536_at	245536_at	At4g15180	746.6	P	405.7	P	555.2	P	hypothetical protein
245537_at	245537_at	At4g15190	8512.1	P	12577.3	P	10782.4	P	hypothetical protein
245538_at	245538_at	At4g15200	2975.2	P	4926.3	P	4355.6	P	p140mDia like protein
245539_at	245539_at	At4g15220	6.8	A	7.2	A	6.4	A	ABC transporter homolog
245540_at	245540_at	At4g15230	170.1	P	202.2	P	140.6	P	ABC transporter like protein
245541_at	245541_at	At4g15240	7.5	A	75	A	4.7	A	hypothetical protein
245542_at	245542_at	At4g15250	53.2	A	6.6	A	18.7	A	CONSTANS like protein
245543_at	245543_at	At4g15260	49.1	A	11.2	A	76.8	P	glucosyltransferase
245544_at	245544_at	At4g15270	45.9	A	13	A	27.4	A	UTP-glucose glucosyltransferase like protein
245545_at	245545_at	At4g15280	42.9	A	120.4	A	138.3	P	UTP-glucose glucosyltransferase
245546_at	245546_at	At4g15290	58.8	A	76	A	10	A	cellulose synthase like protein
245547_at	245547_at	At4g15300	24.7	A	43	A	6.3	A	cytochrome P450 like protein
245548_at	245548_at	At4g15310	8.4	A	101.4	A	70.6	A	cytochrome P450 like protein
245549_at	245549_at	At4g15320	67.7	A	69.8	A	16.1	A	cellulose synthase like protein
245550_at	245550_at	At4g15330	41.7	A	26.5	A	10.8	A	cytochrome P450 like protein
245551_at	245551_at	At4g15350	67.7	A	5.7	A	2.4	A	cytochrome P450 like protein
245552_at	245552_at	At4g15360	60.8	P	52.4	A	40.8	A	cytochrome P450 like protein
245553_at	245553_at	At4g15370	9.1	A	78.3	A	35.3	A	lupeol synthase like protein
245554_at	245554_at	At4g15380	8.8	A	37.4	A	3.3	A	cytochrome P450 like protein
245555_at	245555_at	At4g15390	7.5	A	64.5	A	4.2	A	HSR201 like protein
245556_at	245556_at	At4g15400	11.8	A	3.8	A	5.8	A	HSR201 like protein
245557_at	245557_at	At4g15410	1144.5	P	1028.5	P	970.1	P	phosphatase like protein
245558_at	245558_at	At4g15430	107.3	A	109.9	A	36.1	A	hypothetical protein
245559_at	245559_at	At4g15460	45.1	A	30.4	A	86.8	A	glycine-rich protein like
245560_at	245560_at	At4g15480	22.2	A	65	A	4.8	A	indole-3-acetate beta-glucosyltransferase like protein
245561_at	245561_at	At4g15500	158.5	A	57.2	A	128.8	A	indole-3-acetate beta-glucosyltransferase like protein
245562_at	245562_at	At4g15520	32.7	A	86.9	A	99.5	P	OBP33pep like protein contains non_consensus donor splice site TA at exon 4
245563_at	245563_at	At4g14580	55.3	A	65.3	M	24	A	SNF1 like protein kinase ; supported by cDNA: gi_13249502_gb_AY007221.1_
245564_at	245564_at	At4g14590	56.7	A	92	A	113.8	A	hypothetical protein
245565_at	245565_at	At4g14605	73.5	A	135.6	M	21.4	A	hypothetical protein
245566_at	245566_at	At4g14610	9	A	2.7	A	4.9	A	disease resistance RPS2 like protein
245567_at	245567_at	At4g14630	3.1	A	3.4	A	3.1	A	germin precursor oxalate oxidase
245568_at	245568_at	At4g14650	5.9	A	9.5	A	15.5	A	hypothetical protein
245569_at	245569_at	At4g14660	38.8	A	4.5	A	10	A	RNA polymerase II fifth largest subunit like protein
245570_at	245570_at	At4g14670	7	A	19.8	A	4.5	A	heat shock protein 101 (HSP101),putative similar to heat shock protein 101 GI:6715468 GB:AAF26423 from [Arabidopsis thaliana]
245571_at	245571_at	At4g14695	12.2	A	6.2	A	5.5	A	light induced protein like
245572_at	245572_at	At4g14720	110.5	A	81.9	A	25.6	A	hypothetical protein
245573_at	245573_at	At4g14730	85.4	A	94	A	20.6	A	hypothetical protein
245574_at	245574_at	At4g14750	36.5	A	11.4	A	16.1	A	hypothetical protein
245575_at	245575_at	At4g14760	69.9	A	110.2	A	48.4	A	centromere protein homolog
245576_at	245576_at	At4g14770	227.2	P	117.3	A	124.9	P	hypothetical protein
245577_at	245577_at	At4g14780	4197.3	P	2867.8	P	3003.5	P	kinase like protein
245578_at	245578_at	At4g14790	196.9	P	153.1	P	148.6	A	RNA helicase like protein
245579_at	245579_at	At4g14810	1040.8	P	1800.3	P	1559.6	P	hypothetical protein
245580_at	245580_at	At4g14820	66.9	A	33.7	A	83.6	A	hypothetical protein
245581_at	245581_at	At4g14840	13.1	A	11.4	A	29.1	A	hypothetical protein
245582_at	245582_at	At4g14850	66	A	55.2	A	55	A	hypothetical protein
245583_at	245583_at	At4g14920	530.2	P	463.2	P	360.3	P	hypothetical protein
245584_at	245584_at	At4g14940	4.6	A	22.9	A	62.3	A	amine oxidase like protein
245585_at	245585_at	At4g14970	39.1	A	51.6	A	19.2	A	hypothetical
245586_at	245586_at	At4g14980	82.7	A	70.4	A	6	A	hypothetical protein
245587_at	245587_at	At4g15020	788.9	P	1254.2	P	1420.3	P	putative protein
245588_at	245588_at	At4g15030	150.1	P	293	P	163	P	putative protein
245589_at	245589_at	At4g15040	8.2	A	5.8	A	13.3	A	subtilisin-like serine protease contains similarity to prepro-cucumisin GI:807698 from [Cucumis melo]
245590_at	245590_at	At4g15060	7.6	A	51.5	A	66.7	A	hypothetical protein
245591_at	245591_at	At4g14530	333.7	P	304.1	P	425.3	P	hypothetical protein
245592_at	245592_at	At4g14540	44.3	A	6.7	A	37.9	A	CCAAT-binding transcription factor subunit A(CBF-A)
245593_at	245593_at	At4g14550	96.3	P	82.4	A	5.1	A	IAA7 like protein
245594_at	245594_at	At4g14570	98.8	A	62.4	A	114.2	P	acylaminoacyl-peptidase like protein
245595_at	245595_at	At4g14170	16.2	A	27.9	A	8.3	A	hypothetical protein
245596_at	245596_at	At4g14180	6.4	A	4.3	A	5.3	A	hypothetical protein
245597_at	245597_at	At4g14190	214.2	P	154.4	A	112	A	salt-inducible protein homolog
245598_at	245598_at	At4g14200	477.7	P	600.4	P	469.8	P	hypothetical protein
245599_at	245599_at	At4g14220	33.4	A	23.1	A	110.5	A	RING-H2 finger protein RHF1a
245600_at	245600_at	At4g14230	1646.7	P	1735.8	P	1652.9	P	hypothetical protein
245601_at	245601_at	At4g14240	372.9	P	350.6	P	317.7	P	hypothetical protein
245602_at	245602_at	At4g14270	602.3	P	820.3	P	1049.8	P	Expressed protein ;supported by cDNA: Ceres:30129; supported by cDNA: gi:15028002
245603_at	245603_at	At4g14280	91.5	A	112.8	A	88.5	A	hypothetical protein
245604_at	245604_at	At4g14290	1299.7	P	1829.5	P	2076.8	P	hypothetical protein
245605_at	245605_at	At4g14300	1496.7	P	1320	P	1494.8	P	ribonucleoprotein like protein
245606_at	245606_at	At4g14310	175.9	P	191.3	P	223.7	P	hypothetical protein
245607_at	245607_at	At4g14330	141.3	P	184.4	P	115.5	A	kinesin like protein
245608_at	245608_at	At4g14350	234.7	P	336.4	P	390.1	P	protein kinase
245609_at	245609_at	At4g14370	384.2	P	324.7	P	302.7	P	disease resistance N like protein
245610_at	245610_at	At4g14380	70.1	A	15.2	A	38.1	A	hypothetical protein
245611_at	245611_at	At4g14390	112.5	P	133.4	P	203.9	P	hypothetical protein
245612_at	245612_at	At4g14440	7.9	A	4.3	A	9.7	A	carnitine racemase like protein
245613_at	245613_at	At4g14450	12.8	A	50.5	A	85.6	A	hypothetical protein
245614_at	245614_at	At4g14460	16.3	A	59.3	A	18.7	A	retrovirus-related like polyprotein
245615_at	245615_at	At4g14470	129.3	A	12.7	A	83.4	A	reverse transcriptase like protein
245616_at	245616_at	At4g14480	49.3	A	112	A	43.8	A	kinase like protein
245617_at	245617_at	At4g14490	237.6	P	432.1	P	415	P	hypothetical protein
245618_at	245618_at	At4g14510	315.7	P	170.3	P	172.5	P	hypothetical protein
245619_at	245619_at	At4g13990	84.6	P	104.1	P	5.4	A	hypothetical protein
245620_at	245620_at	At4g14050	37.3	A	5.9	A	5.2	A	hypothetical protein
245621_at	245621_at	At4g14070	53.4	A	83.9	A	42.8	A	AMP-binding protein
245622_at	245622_at	At4g14080	6.1	A	9.6	A	36.8	A	A6 anther-specific protein
245623_s_at	245623_s_at	At4g14103	14.4	A	2.4	A	1.5	A	hypothetical protein
245624_at	245624_at	At4g14090	15.2	A	11.8	A	9.1	A	glucosyltransferase like protein
245625_at	245625_at	At4g14160	453.1	P	625	P	719.2	P	transport protein
245626_at	245626_at	At1g56700	158.1	P	150.8	P	131.3	P	unknown protein ;supported by full-length cDNA: Ceres:21415.
245627_at	245627_at	At1g56600	59.5	A	4.4	A	4.6	A	water stress-induced protein, putative similar to water stress-induced protein GI:454879 from [Oryza sativa]; supported by cDNA: gi_15215761_gb_AY050410.1_
245628_at	245628_at	At1g56650	92.9	A	10.1	A	7.8	A	anthocyanin2, putative similar to anthocyanin2 (An2) GI:7673088 from [Petunia integrifolia]; supported by cDNA: gi_3941507_gb_AF062908.1_AF062908
245629_at	245629_at	At1g56580	2039.5	P	1105.8	P	986.1	P	hypothetical protein predicted by genemark.hmm; supported by cDNA: gi_16648668_gb_AY058110.1_
245630_at	245630_at	At1g25360	144	P	125.9	A	125.8	M	hypothetical protein similar to putative selenium-binding protein GI:3860271 from [Arabidopsis thaliana]
245631_at	245631_at	At1g25350	366.8	P	456.5	P	416.2	P	tRNA-glutamine synthetase, putative similar to tRNA-glutamine synthetase GI:2995454 from [Lupinus luteus]
245632_at	245632_at	At1g25290	160.5	A	139.8	A	106.2	A	unknown protein contains similarity to membrane protein GI:294845 from [Saccharum hybrid cultivar]
245633_at	245633_at	At1g25280	10.6	A	40.8	A	61.1	A	unknown protein similar to putative Tub family protein GI:3738302 from [Arabidopsis thaliana]
245634_at	245634_at	At1g25270	34.6	A	37.9	A	10	A	MtN21 nodulin protein, putative similar to MtN21 nodulin protein GI:9759561 from [Arabidopsis thaliana]
245635_at	245635_at	At1g25250	22.6	A	59.2	A	75.4	A	zinc finger protein ID1, putative similar to zinc finger protein ID1 GI:3170601 from [Zea mays]
245636_at	245636_at	At1g25240	29575.4	P	29158.5	P	28380.1	P	hypothetical protein similar to hypothetical protein GI:6553885 from [Arabidopsis thaliana]
245637_at	245637_at	At1g25230	2.5	A	4.6	A	64.9	A	hypothetical protein similar to putative purple acid phosphatase precursor GI:7331195 from [Glycine max]
245638_s_at	245638_s_at	At1g24996	99.4	A	67.7	A	108.2	A	F5A9.10 unknown protein; similar to ESTs dbj AV530941.1, dbj|AV530975.1, gb|BE037999.1, gb|BE037993.1, gb|AI995009.1, gb|AI099531.1, gb|N37906.1, gb|T76894.1
245639_at	245639_at	At1g25260	69.3	A	131.3	A	91.1	A	unknown protein contains similarity to 60S acidic ribosomal protein GI:5815233 from [Homo sapiens];supported by full-length cDNA: Ceres:6288.
245640_at	245640_at	At1g25330	15	A	95.9	M	264.4	P	helix-loop-helix protein homolog, putative similar to helix-loop-helix protein homolog GI:6520231 from [Arabidopsis thaliana];supported by full-length cDNA: Ceres:98716.
245641_at	245641_at	At1g25370	1184.9	P	1496.6	P	1442.5	P	Expressed protein ; supported by full-length cDNA: Ceres: 118770.
245642_at	245642_at	At1g25275	25	A	110.3	A	9.8	A	Expressed protein ; supported by full-length cDNA: Ceres: 21980.
245643_at	245643_at	At1g25340	16.9	A	35	A	53.4	A	myb-related transcription factor (cpm7), putative similar to myb-related transcription factor (cpm7) GI:1002799 from [Craterostigma plantagineum]; supported by cDNA: gi_15375294_gb_AF334815.2_AF334815
245644_at	245644_at	At1g25320	74.9	A	37.3	A	55.4	A	unknown protein similar to putative receptor-like protein kinase GI:4262228 from [Arabidopsis thaliana]; supported by cDNA: gi_15912326_gb_AY056441.1_
245645_at	245645_at	At1g24764	68.4	A	72.1	A	59.4	A	F5A9.19 unknown protein; similar to ESTs dbj AV529799.1, dbj|AV524005.1
245646_x_at	245646_x_at	At1g25025	27.9	A	87	A	13.1	A	F5A9.9 hypothetical protein
245647_at	245647_at	At1g24678	15	A	45.2	A	5.4	A	F5A9.22 hypothetical protein
245648_at	245648_at	At1g24938	873.7	P	1029.9	P	1166.8	P	F5A9.12 hypothetical protein
245649_at	245649_at	At1g24706	137.6	P	236.2	P	207.4	P	F5A9.21 unknown protein; similar to ESTs gb R64797.1, dbj|AV539937.1
245650_at	245650_at	At1g24735	12.1	A	13.7	A	40.2	A	F5A9.20 similar to S-adenosyl-L-methionine:trans-caffeoyl-Co enzyme A 3-0-methyltransferase gb AAA62426.1
245651_s_at	245651_s_at	At1g24793	10156.4	P	9554.6	P	9132	P	F5A9.18 unknown protein; similar to ESTs dbj AV442495.1, gb|BE522756.1, gb|T42945.1, gb|BE525268.1, gb|BE523201.1, gb|BE526298.1, gb|T42945.1, gb|AA651584.1, dbj|AV552951.1, dbj|AV547151.1, dbj|AV563142.1
245652_at	245652_at	At4g13960	77.3	A	130.7	A	141.3	A	F-box protein family, putative
245653_at	245653_at	At4g13985	18.6	A	11.9	A	3.9	A	heat shock transcription factor like protein
245654_at	245654_at	At1g56540	702.9	P	1022	P	883.2	P	disease resistance protein, putative similar to disease resistance protein GI:9279731 from [Arabidopsis thaliana]
245655_at	245655_at	At1g56530	56.9	A	16.7	A	33.9	A	hypothetical protein predicted by genemark.hmm
245656_at	245656_at	At1g56620	50.6	A	11.2	A	6.9	A	hypothetical protein predicted by genemark.hmm
245657_at	245657_at	At1g56720	56.9	A	47.4	A	74.9	A	unknown protein similar to receptor-like protein kinase GI:7529754 from [Arabidopsis thaliana];supported by full-length cDNA: Ceres:36000.
245658_at	245658_at	At1g28270	55035.4	P	65023.8	P	60769	P	hypothetical protein predicted by genemark.hmm
245659_at	245659_at	At1g28260	157.5	M	16.9	A	24.3	A	hypothetical protein predicted by genemark.hmm
245660_at	245660_at	At1g28240	1157.8	P	1131	P	1368.1	P	unknown protein
245661_at	245661_at	At1g28220	1558.4	P	1168.8	P	1343.3	P	purine permease, putative similar to purine permease GI:7620007 from [Arabidopsis thaliana]
245662_at	245662_at	At1g28190	97.1	A	21.6	A	39.6	A	hypothetical protein predicted by genemark.hmm
245663_at	245663_at	At1g28170	7.1	A	44.3	A	7.5	A	steroid sulfotransferase, putative similar to steroid sulfotransferase 3 GI:3420008 from [Brassica napus]
245664_at	245664_at	At1g28327	2.7	A	12.8	A	12.6	A	hypothetical protein predicted by genemark.hmm
245665_at	245665_at	At1g28250	494.5	P	408.9	P	615.9	P	unknown protein ;supported by full-length cDNA: Ceres:24560.
245666_at	245666_at	At1g28280	7.3	A	77.8	A	80.6	A	hypothetical protein predicted by genemark.hmm;supported by full-length cDNA: Ceres:20991.
245667_at	245667_at	At1g28200	2354.6	P	1843.4	P	1894.8	P	FH protein interacting protein FIP1 identical to FH protein interacting protein FIP1 GI:6503012 from [Arabidopsis thaliana]; supported by full-length cDNA: Ceres: 30245.
245668_at	245668_at	At1g28330	8.5	A	14.9	A	8.6	A	dormancy-associated protein, putative similar to dormancy-associated protein GI:2995990 from [Arabidopsis thaliana]; supported by cDNA: gi_14335095_gb_AY037227.1_
245669_at	245669_at	At1g28300	57.5	A	33.8	A	3.5	A	hypothetical protein contains similarity to C-ABI3 protein GI:5578746 from [Daucus carota]; supported by cDNA: gi_15987515_gb_AF400123.1_AF400123
245670_at	245670_at	At1g28210	925.3	P	336	P	227.1	P	mitochondrial protein (AtJ1), putative similar to mitochondrial protein (AtJ1) GI:564030 from [Arabidopsis thaliana]; supported by cDNA: gi_564029_gb_U16246.1_ATU16246
245671_at	245671_at	At1g28230	59	A	83.4	A	60	A	purine permease identical to purine permease GI:7620007 from [Arabidopsis thaliana]; supported by cDNA: gi_7620006_gb_AF078531.1_AF078531
245672_at	245672_at	At1g56710	4.9	A	33.7	A	107.6	A	polygalacturonase, putative similar to polygalacturonase PG1 GI:5669846 from [Glycine max]
245673_at	245673_at	At1g56690	11.8	A	37.6	A	28.2	A	hypothetical protein similar to putative selenium-binding protein GI:9230129 from [Arabidopsis thaliana]
245674_at	245674_at	At1g56680	6.5	A	5.7	A	5.4	A	chitinase, putative similar to chitinase GI:17798 from [Brassica napus]
245675_at	245675_at	At1g56675	46.9	A	25.1	A	49.1	A	hypothetical protein similar to putative retroelement pol polyprotein GI:6850344 from [Arabidopsis thaliana]
245676_at	245676_at	At1g56670	7.7	A	6.4	A	6.6	A	nodule-specific protein, putative similar to early nodule-specific protein GI:3328240 from [Medicago truncatula]
245677_at	245677_at	At1g56660	272.7	P	302.2	P	320.5	P	hypothetical protein predicted by genemark.hmm
245678_at	245678_at	At1g56610	154.8	P	80	A	25.1	A	unknown protein
245679_at	245679_at	At1g56590	250.8	P	295.7	P	328.3	P	clathrin-associated protein, putative similar to clathrin-associated protein GI:3341417 from [Drosophila melanogaster]
245680_at	245680_at	At1g56570	4.7	A	14.3	A	55.1	A	hypothetical protein contains similarity to putative selenium-binding protein GI:9230129 from [Arabidopsis thaliana]
245681_at	245681_at	At1g56560	1535.4	P	1816.7	P	1718.1	P	alkaline/neutral invertase, putative similar to alkaline/neutral invertase GI:9758657 from [Arabidopsis thaliana]
245682_at	245682_at	At5g08750	4	A	91	A	58.6	A	Expressed protein ; supported by cDNA: gi_16209721_gb_AY057621.1_
245683_at	245683_at	At5g22030	753	P	997.5	P	944	P	ubiquitin-specific protease 8 (UBP8), putative similar to ubiquitin-specific protease 8 partial sequence GI:11993469 [Arabidopsis thaliana]
245684_at	245684_at	At5g22000	9277.3	P	8360.6	P	8128.5	P	Expressed protein ; supported by cDNA: gi_11762135_gb_AF324994.1_AF324994
245685_at	245685_at	At5g22220	532.2	P	517	P	587.5	P	Expressed protein ; supported by cDNA: gi_10443848_gb_AF242580.1_AF242580
245686_at	245686_at	At5g22060	4267.7	P	5015.1	P	5800.2	P	Expressed protein ; supported by cDNA: gi_535587_gb_L36113.1_ATHATJ
245687_at	245687_at	At1g28320	164	P	187.5	P	195	P	unknown protein
245688_at	245688_at	At1g28290	6.2	A	5.6	A	3.2	A	prolin-rich protein, putative similar to prolin-rich protein GI:21045 from [Phaseolus vulgaris]
245689_at	245689_at	At5g04120	75.1	A	95.3	A	93.5	P	phosphoglycerate mutase - like protein
245690_at	245690_at	At5g04230	85.1	A	151	P	132	P	phenylalanine ammonia-lyase PAL3
245691_at	245691_at	At5g04240	688.1	P	817.9	P	685.2	P	zinc finger protein - like
245692_at	245692_at	At5g04150	7.4	A	5.6	A	6.1	A	myc - like protein
245693_at	245693_at	At5g04260	5.5	A	14	A	13.5	A	thioredoxin - like protein
245694_at	245694_at	At5g04170	867	P	746.8	P	1019	P	EF - hand Calcium binding protein - like
245695_at	245695_at	At5g04270	210.4	A	327.1	P	336.4	P	rec - like protein
245696_at	245696_at	At5g04190	3.3	A	7.8	A	4.4	A	phytochrome kinase substrate 1 - like protein
245697_at	245697_at	At5g04200	90.1	A	41.4	A	96.8	A	latex-abundant protein - like ;supported by full-length cDNA: Ceres:25121.
245698_at	245698_at	At5g04160	1604.4	P	1476.3	P	1693.3	P	phosphate/phosphoenolpyruvate translocator - like protein ;supported by full-length cDNA: Ceres:100777.
245699_at	245699_at	At5g04250	2401.4	P	2594.7	P	2669.5	P	putative protein ;supported by full-length cDNA: Ceres:29990.
245700_at	245700_at	At5g04180	50660.6	P	38298.7	P	31578.4	P	carbonate dehydratase - like protein ;supported by full-length cDNA: Ceres:97982.
245701_at	245701_at	At5g04140	12	A	22.2	A	24.7	A	ferredoxin-dependent glutamate synthase ; supported by cDNA: gi_3869250_gb_U39287.1_ATU39287
245702_at	245702_at	At5g04220	321	P	229.2	P	366.1	P	calcium lipid binding protein - like GC donor splice site at exon 3; supported by cDNA: gi_16604592_gb_AY059741.1_
245703_at	245703_at	At5g04380	43.2	A	39.3	A	7.3	A	S-adenosyl-L-methionine:salicylic acid carboxyl methyltransferase-like protein
245704_at	245704_at	At5g04290	70.7	A	103.1	A	49.9	A	glycine-rich protein
245705_at	245705_at	At5g04390	1189.9	P	1941.1	P	1625.6	P	zinc finger transcription factor-like protein
245706_at	245706_at	At5g04300	41.7	A	14.2	A	84.5	A	putative protein
245707_at	245707_at	At5g04400	17	A	154.4	A	20.2	A	NAC2-like protein
245708_at	245708_at	At5g04310	49.8	A	71.4	A	76.9	A	pectate lyase-like protein
245709_at	245709_at	At5g04320	159	P	158.1	P	190.6	M	putative protein
245710_at	245710_at	At5g04330	8.4	A	20.1	A	32.2	A	ferulate-5-hydroxylase
245711_at	245711_at	At5g04340	38	A	116	A	64.4	A	putative c2h2 zinc finger transcription factor
245712_at	245712_at	At5g04360	50.7	A	214.2	M	241.1	A	pullulanase-like protein (starch debranching enzyme)
245713_at	245713_at	At5g04370	5.7	A	7.1	A	2.4	A	S-adenosyl-L-methionine:salicylic acid carboxyl methyltransferase-like protein
245714_at	245714_at	At5g04280	474.7	P	563.4	P	426.2	P	RNA-binding protein-like
245715_s_at	245715_s_at	At5g08690	842.8	P	735.5	P	856	P	Expressed protein ; supported by cDNA: gi_15293122_gb_AY050995.1_
245716_at	245716_at	At5g08740	183.3	P	210.4	P	216.3	P	Expressed protein ; supported by cDNA: gi_15912292_gb_AY056424.1_
245717_at	245717_at	At5g33390	65.9	A	153.4	A	98.5	A	Expressed protein ; supported by cDNA: gi_15293032_gb_AY050950.1_
245718_at	245718_at	At5g04100	2989.5	P	3247	P	2999.6	P	putative protein
245719_at	245719_at	At5g04110	614.5	P	695	P	689.6	P	DNA gyrase subunit B - like protein
245720_at	245720_at	At5g04210	39.7	A	12.4	A	89	A	RNA binding protein - like
245721_s_at	245721_s_at	At1g73460	1658.7	P	1856.7	P	1867.7	P	hypothetical protein similar to Ser-Thr protein kinase-like protein GI:9294588 from [Arabidopsis thaliana]
245722_at	245722_at	At1g73430	362.1	P	197.5	P	446.9	P	unknown protein
245723_at	245723_at	At1g73400	91.4	A	111.6	A	37.5	A	hypothetical protein predicted by genemark.hmm
245724_at	245724_at	At1g73390	488.4	P	539.8	P	562.1	P	hypothetical protein predicted by genemark.hmm
245725_at	245725_at	At1g73370	14	A	11.9	A	11.1	A	sucrose synthase, putative similar to sucrose synthase GI:4468151 from [Craterostigma plantagineum]
245726_at	245726_at	At1g73360	59.2	A	92.7	A	68.2	A	homeobox protein, putative similar to homeobox protein GI:1173621 from [ Phalaenopsis sp.]
245727_at	245727_at	At1g73350	437.3	P	429.1	P	369.9	P	hypothetical protein contains similarity to glucosidase II beta-subunit GI:5452942 from [Mus musculus]
245728_at	245728_at	At1g73340	5	A	6.1	A	63.5	A	steroid 22-alpha-hydroxylase, putative similar to steroid 22-alpha-hydroxylase GI:2935342 from [Arabidopsis thaliana]
245729_at	245729_at	At1g73490	141.6	P	253.8	P	252.6	P	unknown protein
245730_at	245730_at	At1g73470	74	A	41.7	A	45.7	A	unknown protein ;supported by full-length cDNA: Ceres:39155.
245731_at	245731_at	At1g73500	14.1	A	126.1	A	124.2	A	MAP kinase, putative similar to MAP kinase kinase 5 GI:3219273 from [Arabidopsis thaliana];supported by full-length cDNA: Ceres:112118.
245732_at	245732_at	At1g73440	456.1	P	365.5	P	401.1	P	unknown protein contains similarity to calmodulin GI:166304 from [Achlya klebsiana]; supported by cDNA: gi_13358218_gb_AF325029.2_AF325029
245733_at	245733_at	At1g73380	225.5	P	165.3	P	125.9	M	hypothetical protein predicted by genemark.hmm; supported by cDNA: gi_14334537_gb_AY035173.1_
245734_at	245734_at	At1g73480	6599.3	P	4571.4	P	5273.7	P	lysophospholipase homolog, putative similar to lysophospholipase homolog GI:2801536 from [Oryza sativa]; supported by cDNA: gi_15028212_gb_AY045929.1_
245735_at	245735_at	At1g73410	22.3	A	19.5	A	41.7	A	myb-like transcription factor, putative similar to myb-like protein GI:6979341 from [Oryza sativa]; supported by cDNA: gi_3941471_gb_AF062890.1_AF062890
245736_at	245736_at	At1g73330	113.2	A	74.3	A	14	A	Dr4(protease inhibitor) identical to Dr4 GI:469114 from [Arabidopsis thaliana]; supported by cDNA: gi_13877842_gb_AF370184.1_AF370184
245737_at	245737_at	At1g44160	10090.5	P	11046.6	P	10408.4	P	hypothetical protein similar to putative heat shock protein GI:6403504 from [Arabidopsis thaliana]
245738_at	245738_at	At1g44130	25.9	A	28.6	A	26.8	A	nucellin, putative similar to nucellin GI:2290201 from [Hordeum vulgare]
245739_at	245739_at	At1g44110	266.5	P	772.9	P	574.7	P	mitotic cyclin a2-type, putative similar to mitotic cyclin a2-type GI:857396 from [Glycine max]
245740_at	245740_at	At1g44100	81.4	A	120.2	A	46.9	A	amino acid permease, putative almost identical to amino acid permease GI:608673 from [Arabidopsis thaliana]
245741_at	245741_at	At1g44120	6504.3	P	7130.1	P	7222	P	hypothetical protein similar to unknown protein GI:6382494 from [Arabidopsis thaliana]
245742_at	245742_at	At1g44170	58.4	A	79.3	A	19	A	aldehyde dehydrogenase, putative similar to aldehyde dehydrogenase GI:2351120 from [Synechococcus PCC7942];supported by full-length cDNA: Ceres:1141.
245743_at	245743_at	At1g51080	4.7	A	5.3	A	3.9	A	hypothetical protein contains similarity to DNA polymerase III, epsilon subunit GI:8163241 from [Chlamydia muridarum]
245744_at	245744_at	At1g51110	8.4	A	29	A	6.6	A	unknown protein
245745_at	245745_at	At1g51115	62.5	A	18.2	A	35.3	A	unknown protein contains similarity to anthranilate synthase large subunit GI:1374671 from [Buchnera aphidicola]
245746_at	245746_at	At1g51070	33.6	A	167.5	A	152.6	A	bHLH transcription factor, putative similar to bHLH transcription factor GI:3757520 from [Arabidopsis thaliana];supported by full-length cDNA: Ceres:16284.
245747_at	245747_at	At1g51100	5.6	A	17.7	A	4.8	A	hypothetical protein predicted by genemark.hmm;supported by full-length cDNA: Ceres:31356.
245748_at	245748_at	At1g51140	60.1	A	156.6	A	41.3	A	unknown protein contains similarity to phytochrome interacting factor 3 GI:3929586 from [Arabidopsis thaliana]; supported by cDNA: gi_14334499_gb_AY034941.1_
245749_at	245749_at	At1g51090	9.5	A	5.1	A	4.6	A	proline-rich protein, putative similar to proline-rich protein GI:3242079 from [Capsicum annuum]; supported by cDNA: gi_14334847_gb_AY035097.1_
245750_at	245750_at	At1g51060	8546.3	P	9434.2	P	10307.1	P	histone H2A, putative similar to histone H2A GI:9758956 from [Arabidopsis thaliana]; supported by cDNA: gi_13877850_gb_AF370188.1_AF370188
245751_s_at	245751_s_at	At1g25988	1205.4	P	1802.4	P	1612.5	P	hypothetical protein contains similarity to virulence regulator GI:9106522 from [Xylella fastidiosa]
245752_at	245752_at	At1g35150	32.7	A	11	A	37.4	A	hypothetical protein similar to Ac-like transposase GB:AAD25149 GI:4584355 from [Arabidopsis thaliana]
245753_at	245753_at	At1g35143	39.7	A	3.2	A	15.6	A	hypothetical protein similar to putative replication protein GB:AAF30343 GI:6862955 from [Arabidopsis thaliana]
245754_at	245754_at	At1g35183	25	A	12.9	A	6.2	A	hypothetical protein predicted by genemark.hmm
245755_at	245755_at	At1g35210	21.8	A	55.6	A	33.5	A	hypothetical protein predicted by genemark.hmm;supported by full-length cDNA: Ceres:42217.
245756_at	245756_at	At1g35190	7029.8	P	7236.9	P	6661.7	P	hyoscyamine 6-dioxygenase hydroxylase, putative similar to hyoscyamine 6-dioxygenase hydroxylase GB:P24397 from [Hyoscyamus niger];supported by full-length cDNA: Ceres:2551.
245757_at	245757_at	At1g35140	1049.1	P	4541.7	P	4132.9	P	phosphate-induced (phi-1) protein, putative similar to phi-1 GB:BAA33810 GI:3759184 from [Nicotiana tabacum];supported by full-length cDNA: Ceres:118937.
245758_at	245758_at	At1g32240	80.2	A	37.7	A	129.7	P	unknown protein contains similarity to transfactor GB:BAA75684 GI:4519671 from [Nicotiana tabacum]; supported by cDNA: gi_15723594_gb_AY048689.1_
245759_at	245759_at	At1g66900	1146.5	P	2296.8	P	2063	P	hypothetical protein predicted by genemark.hmm
245760_s_at	245760_s_at	At1g66920	8.7	A	2.8	A	4.2	A	receptor serine/threonine kinase PR5K, putative similar to receptor serine/threonine kinase PR5K GI:1235680 from [Arabidopsis thaliana]
245761_at	245761_at	At1g66890	34	A	55.3	A	21.9	A	hypothetical protein predicted by genemark.hmm;supported by full-length cDNA: Ceres:7343.
245762_at	245762_at	At1g27880	184.4	P	170.5	P	104.3	A	ATP-dependent DNA helicase RecQ, putative similar to ATP-dependent DNA helicase RecQ GB:AAF93372 GI:9654602 from [Vibrio cholerae]
245763_at	245763_at	At1g27850	272.3	P	153.1	P	230.4	P	transposon protein, putative similar to En/Spm-like transposon protein GB:AAB95292 GI:2088658 from [Arabidopsis thaliana]
245764_s_at	245764_s_at	At1g27840	192.6	P	222.7	P	221.8	P	hypothetical protein contains similarity to cockayne syndrome complementation group A protein GB:U28413 GI:975301 from [Homo sapiens]
245765_at	245765_at	At1g33600	109.7	A	280.9	P	155.5	P	hypothetical protein similar to putative disease resistance protein GB:AAC14512 GI:2739389 from [Arabidopsis thaliana]
245766_at	245766_at	At1g33580	2.5	A	65.7	A	84.1	A	En/Spm-like transposon protein, putative similar to En/Spm-like transposon protein GB:AAD03364 GI:4115362 from [Arabidopsis thaliana]
245767_at	245767_at	At1g33610	52.2	A	3.2	A	50.6	A	hypothetical protein similar to putative disease resistance protein GB:AAC14512 GI:2739389 from [Arabidopsis thaliana]
245768_at	245768_at	At1g33590	86.9	P	126.1	A	41.8	A	hypothetical protein similar to putative disease resistance protein GB:AAC14512 GI:2739389 from [Arabidopsis thaliana];supported by full-length cDNA: Ceres:105146.
245769_at	245769_at	At1g30220	75.9	A	96.4	A	77.4	P	hypothetical protein similar to putative sugar transporter GI:4263781 from [Arabidopsis thaliana]
245770_at	245770_at	At1g30240	52.9	A	56.2	A	51.9	A	hypothetical protein predicted by genemark.hmm
245771_at	245771_at	At1g30250	39.4	A	11.7	A	13.3	A	hypothetical protein predicted by genemark.hmm
245772_at	245772_at	At1g30300	528.7	P	848.5	P	829	P	hypothetical protein similar to putative hydrolase GI:7270684 from [Arabidopsis thaliana]
245773_at	245773_at	At1g30290	276.5	P	203.8	P	164.6	P	hypothetical protein predicted by genscan+
245774_at	245774_at	At1g30210	18.4	A	4.3	A	10.7	A	hypothetical protein contains similarity to cyc1A protein GI:6358548 from [Antirrhinum graniticum]; supported by cDNA: gi_14334669_gb_AY035008.1_
245775_at	245775_at	At1g30270	2753.2	P	3067	P	2967.8	P	serine/threonine kinase, putative similar to serine/threonine kinase GI:2632252 from [Sorghum bicolor]; supported by cDNA: gi_14486385_gb_AY035226.1_
245776_at	245776_at	At1g30260	3.1	A	3.4	A	5.9	A	hypothetical protein predicted by genscan+; supported by cDNA: gi_16323183_gb_AY057696.1_
245777_at	245777_at	At1g73540	6417.3	P	6051.4	P	5288.9	P	unknown protein contains similarity to diphosphoinositol polyphosphate phosphohydrolase GI:3978224 from [Homo sapiens]
245778_at	245778_at	At1g73530	66.4	A	62.2	A	21	A	RNA-binding glycine-rich protein, putative similar to RNA-binding glycine-rich protein (RGP-1a) GI:436789 from [Nicotiana sylvestris]
245779_at	245779_at	At1g73510	311.5	P	465.8	P	403.2	P	hypothetical protein predicted by genemark.hmm
245780_at	245780_at	At1g45688	64.6	A	9.5	A	9.1	A	unknown protein ;supported by full-length cDNA: Ceres:8255.
245781_at	245781_at	At1g45976	1059.9	P	1100.9	P	1188.3	P	S-ribonuclease binding protein SBP1, putative similar to S-ribonuclease binding protein SBP1 GI:6760451 from [Petunia hybrida]; supported by cDNA: gi_11692935_gb_AF324720.1_AF324720
245782_at	245782_at	At1g35200	5	A	5.9	A	6.5	A	60S ribosomal protein (fragment), putative similar to 60S ribosomal protein L4 (fragment) GB:P49691 from [Arabidopsis thaliana]
245783_s_at	245783_s_at	At1g35180	36.8	A	9.9	A	25.7	A	hypothetical protein similar to hypothetical protein GB:AAF69173 GI:7767676 from [Arabidopsis thaliana]
245784_at	245784_at	At1g32190	38.1	A	15.6	A	28.1	A	hypothetical protein similar to hypothetical protein GB:AAD18105 GI:4337191 from [Arabidopsis thaliana]
245785_at	245785_at	At1g32180	19.2	A	6.8	A	3.1	A	cellulose synthase catalytic subunit, putative similar to cellulose synthase catalytic subunit GB:BAB09693 GI:9759258 from [Arabidopsis thaliana]
245786_at	245786_at	At1g32150	216.8	P	93	A	200.3	A	G-Box binding protein, putative similar to G-Box binding protein 2 GB:AAD42938 GI:5381313 from [Catharanthus roseus]
245787_at	245787_at	At1g32130	3074	P	3185.5	P	3121.2	P	unknown protein
245788_at	245788_at	At1g32120	10.7	A	8.1	A	8.7	A	hypothetical protein similar to hypothetical protein GB:AAD27684 GI:4680504 from [Oryza sativa]
245789_at	245789_at	At1g32090	9.8	A	47.1	A	14.2	A	hypothetical protein similar to hypothetical protein GB:CAB77775 GI:7269775 from [Arabidopsis thaliana]
245790_at	245790_at	At1g32200	5	A	26.5	A	6.6	A	glycerol-3-phosphate acyltransferase identical to glycerol-3-phosphate acyltransferase GB:Q43307 from [Arabidopsis thaliana]
245791_at	245791_at	At1g32210	588.4	P	398.8	P	448.7	P	defender against cell death protein, putative similar to defender against cell death protein GB:AAC36169 GI:3608136 from [Arabidopsis thaliana]
245792_at	245792_at	At1g32100	73.3	A	92.3	A	48.2	A	pinoresinol-lariciresinol reductase, putative similar to pinoresinol-lariciresinol reductase GB:AAF63508 GI:7542583 from [Thuja plicata];supported by full-length cDNA: Ceres:33000.
245793_at	245793_at	At1g32220	411.2	P	481.5	P	283.7	P	unknown protein ;supported by full-length cDNA: Ceres:3464.
245794_at	245794_at	At1g32170	6209.2	P	6110.9	P	5691.8	P	endoxyloglucan transferase, putative similar to endoxyloglucan transferase GB:AAD45125 GI:5533313 from [Arabidopsis thaliana]; supported by full-length cDNA: Ceres: 21403.
245795_at	245795_at	At1g32160	106.9	A	51.2	A	7.9	A	unknown protein contains similarity to obtusifoliol 14-alpha-demethylase (CYP51) GB:Y09292 GI:1707854 from [Triticum aestivum];supported by full-length cDNA: Ceres:39425.
245796_at	245796_at	At1g32230	3327.1	P	2365.5	P	2209.8	P	unknown protein similar to unknown protein GB:AAC36170 GI:3608137 from [Arabidopsis thaliana]; supported by cDNA: gi_11044956_emb_AJ251578.1_ATH251578
245797_at	245797_at	At1g45261	60	A	106.7	A	15.5	A	defective chloroplasts and leaves (DCL) protein, putative similar to defective chloroplasts and leaves (DCL) protein GI:1305530 from [Lycopersicon esculentum]
245798_at	245798_at	At1g45545	1176.3	P	1330	P	1296.9	P	hypothetical protein predicted by genemark.hmm
245799_at	245799_at	At1g45616	4.4	A	2.8	A	30.8	A	disease resistance protein, putative similar to disease resistance protein GI:9294201 from [Arabidopsis thaliana]
245800_at	245800_at	At1g46264	4.4	A	7.3	A	5.1	A	heat shock transcription factor, putative similar to heat shock transcription factor 5 GI:662931 from [Glycine max]
245801_at	245801_at	At1g46912	22.3	A	43.5	A	3.7	A	hypothetical protein similar to hypothetical protein GI:4589954 from [Arabidopsis thaliana]
245802_at	245802_at	At1g46840	5.1	A	34.8	A	53.8	A	hypothetical protein similar to hypothetical protein GI:4589954 from [Arabidopsis thaliana]
245803_at	245803_at	At1g47128	151.6	P	124	A	188.1	P	cysteine proteinase RD21A identical to thiol protease RD21A SP:P43297 from [Arabidopsis thaliana]
245804_at	245804_at	At1g46696	18.4	A	86.3	A	69.1	A	hypothetical protein predicted by genemark.hmm
245805_at	245805_at	At1g46336	2.9	A	2.2	A	20.1	A	hypothetical protein predicted by genemark.hmm
245806_at	245806_at	At1g45474	67	A	45.1	A	59.2	A	light-harvesting complex protein similar to light-harvesting complex protein GI:22752 from [Pinus sylvestris];supported by full-length cDNA: Ceres:41745.
245807_at	245807_at	At1g46768	9.3	A	35.5	A	79.9	A	AP2 domain containing protein RAP2.1 similar to AP2 domain containing protein RAP2.1 GI:2281627 from [Arabidopsis thaliana];supported by full-length cDNA: Ceres:28451.
245808_at	245808_at	At1g58470	108.3	A	43.6	A	115.9	A	RNA binding protein identical to RNA binding protein GI:6566348 from [Arabidopsis thaliana]; supported by cDNA: gi_15450911_gb_AY054536.1_
245809_at	245809_at	At1g58440	9171	P	10069.8	P	9656.7	P	squalene monooxygenase, putative similar to squalene monooxygenase GI:9757924 from [Arabidopsis thaliana]; supported by cDNA: gi_6566341_dbj_AB008021.1_AB008021
245810_at	245810_at	At1g37607	6.5	A	23.3	A	7.1	A	axi 1 protein, putative similar to axi 1 protein GB:X80301 GI:559920 from [Nicotiana tabacum]
245811_at	245811_at	At1g37826	47	A	2.3	A	68.5	A	hypothetical protein similar to putative retroelement pol polyprotein GB:AAD23707 GI:4567295 from [Arabidopsis thaliana]
245812_at	245812_at	At1g37900	10	A	45.1	A	5.1	A	hypothetical protein predicted by genemark.hmm
245813_at	245813_at	At1g49920	37.1	A	44.6	A	100.8	A	hypothetical protein contains similarity to mutator-like transposase GB:AAD25847 GI:4587619 from [Arabidopsis thaliana]
245814_at	245814_at	At1g49910	631.9	P	531.7	P	614	P	mitotic checkpoint protein, putative similar to mitotic checkpoint protein GB:BAB02543 GI:9294423 from [Arabidopsis thaliana]
245815_at	245815_at	At1g26090	52.6	A	18.3	A	6.5	A	unknown protein
245816_at	245816_at	At1g26210	26	A	7.1	A	44	A	hypothetical protein similar to hypothetical protein GI:6524175 from [Arabidopsis thaliana];supported by full-length cDNA: Ceres:3618.
245817_at	245817_at	At1g26160	186.1	P	138.3	P	43.2	A	hypothetical protein similar to unknown protein GI:3738315 from [Arabidopsis thaliana];supported by full-length cDNA: Ceres:37861.
245818_at	245818_at	At1g26100	15.4	A	45.5	A	64.8	A	cytochrome b561, putative similar to cytochrome b561 GI:291 from (Bos taurus)
245819_at	245819_at	At1g26310	16.6	A	136.2	P	7.7	A	cauliflower identical to CAULIFLOWER GI:3789808 from [Arabidopsis thaliana]; supported by full-length cDNA: Ceres: 23736.
245820_at	245820_at	At1g26320	787.3	P	710.7	P	652.1	P	allyl alcohol dehydrogenase, putative similar to allyl alcohol dehydrogenase GI:9758497 from [Arabidopsis thaliana];supported by full-length cDNA: Ceres:40824.
245821_at	245821_at	At1g26270	556.4	P	593.5	P	637.6	P	hypothetical protein similar to putative ubiquitin GI:4415931 from [Arabidopsis thaliana]; supported by cDNA: gi_14334681_gb_AY035014.1_
245822_at	245822_at	At1g26110	118.6	A	207.9	P	169.5	P	unknown protein ; supported by cDNA: gi_13605703_gb_AF361833.1_AF361833
245823_at	245823_at	At1g57906	47.8	A	4.1	A	18	A	hypothetical protein predicted by genemark.hmm
245824_at	245824_at	At1g57943	5.9	A	6.1	A	73.7	A	hypothetical protein predicted by genemark.hmm
245825_at	245825_at	At1g57870	69.7	A	128.9	P	102.8	A	protein kinase, putative similar to protein kinase GI:717180 from (Arabidopsis thaliana)
245826_at	245826_at	At1g57850	43.4	A	3.5	A	45.9	A	disease resistance protein RPS4, putative similar to disease resistance protein RPS4 GI:9759605 from [Arabidopsis thaliana]
245827_at	245827_at	At1g57830	23.8	A	56.2	A	54.7	A	disease resistance protein RPS4, putative similar to disease resistance protein RPS4 GI:5459305 from [Arabidopsis thaliana]
245828_at	245828_at	At1g57820	581.8	P	573.7	P	945.2	P	transcription factor, putative similar to transcription factor ICBP90 GI:6815251 from [Homo sapiens]
245829_at	245829_at	At1g57780	4.8	A	35.5	A	8.6	A	hypothetical protein predicted by genemark.hmm
245830_at	245830_at	At1g57790	17.7	A	17.7	A	10.4	A	hypothetical protein predicted by genemark.hmm;supported by full-length cDNA: Ceres:111354.
245831_at	245831_at	At1g48840	24.4	A	95.1	A	52.1	A	unknown protein
245832_at	245832_at	At1g48850	973.8	P	1220	P	1242.8	P	chorismate synthase, putative similar to chorismate synthase GI:452796 from [Synechocystis sp.]; supported by cDNA: gi_15982823_gb_AY057519.1_
245833_at	245833_at	At1g42220	124.5	A	57	A	81	A	transposon protein, putative similar to En/Spm-like transposon protein GI:4263768 from [Arabidopsis thaliana]
245834_at	245834_at	At1g42200	14.1	A	3.1	A	4	A	transposon protein, putative similar to En/Spm-like transposon protein GI:2342733 from [Arabidopsis thaliana]
245835_at	245835_at	At1g42190	6.6	A	4.4	A	40.4	A	hypothetical protein similar to putative transposon protein GI:7267139 from [Arabidopsis thaliana]
245836_at	245836_at	At1g42250	3.2	A	45.3	A	2.1	A	hypothetical protein similar to hypothetical protein GI:7573347 from [Arabidopsis thaliana]
245837_at	245837_at	At1g58450	6.6	A	4.4	A	4.8	A	peptidylprolyl isomerase, putative similar to peptidylprolyl isomerase GI:9294180 from [Arabidopsis thaliana]
245838_at	245838_at	At1g58410	53.5	A	137.8	A	59.5	A	disease resistance protein, putative similar to disease resistance protein RPP8 GI:8843900 from [Arabidopsis thaliana]
245839_at	245839_at	At1g58390	2.7	A	8	A	2.7	A	disease resistance protein, putative similar to disease resistance protein RPP8 GI:8843900 from [Arabidopsis thaliana]
245840_at	245840_at	At1g58420	174.5	P	383.1	P	356	P	hypothetical protein predicted by genemark.hmm;supported by full-length cDNA: Ceres:124269.
245841_s_at	245841_s_at	At1g58380	648.7	P	658.3	P	764.1	P	ribosomal protein S2, putative similar to ribosomal protein S2 GI:939717 from [Urechis caupo];supported by full-length cDNA: Ceres:93867.
245842_at	245842_at	At1g58430	85	A	69	A	13.3	A	proline-rich protein, putative similar to proline-rich protein GI:22596 from [Brassica napus];supported by full-length cDNA: Ceres:34681.
245843_at	245843_at	At1g26180	262	P	612.8	P	525.6	P	unknown protein
245844_at	245844_at	At1g26170	90.5	A	91.6	A	80.3	A	hypothetical protein predicted by genemark.hmm
245845_at	245845_at	At1g26150	97.9	A	51	A	58	A	Pto kinase interactor, putative similar to Pto kinase interactor 1 GI:3668069 from [Lycopersicon esculentum]
245846_at	245846_at	At1g26130	1316.6	P	1140.6	P	1247.1	P	P-type transporting ATPase, putative similar to P-type transporting ATPase GI:9229867 from [Arabidopsis thaliana]
245847_at	245847_at	At5g11050	81.6	A	40.8	A	54.2	A	MYB DNA-binding - like protein myb-related gene A-myb, Homo sapiens, EMBL:HSAMYB; supported by cDNA: gi_15375309_gb_AY032854.2_
245848_at	245848_at	At5g13480	347.3	P	381.4	P	367	P	putative protein predicted proteins - different species
245849_at	245849_at	At5g13520	54.7	A	7.1	A	5.8	A	leukotriene-A4 hydrolase-like protein leukotriene-A4 hydrolase (EC 3.3.2.6) long isoform - Homo sapiens, EMBL:U27292
245850_at	245850_at	At5g13530	8.9	A	85.5	A	36.4	A	ankyrin-repeat containing protein ankyrin-repeat containing proteins
245851_at	245851_at	At5g13540	235.7	P	547.8	P	495.6	P	putative protein HERC2 - Homo sapiens, EMBL:AF071172
245852_at	245852_at	At5g13510	88.6	A	97.5	A	21.3	A	ribosomal protein L10-like ribosomal protein L10- Nicotiana tabacum, EMBL:AB010879;supported by full-length cDNA: Ceres:29083.
245853_at	245853_at	At5g13500	26.7	A	29.2	A	67.7	A	putative protein predicted protein At2g25260 - Arabidopsis thaliana, EMBL:AC007070;supported by full-length cDNA: Ceres:6674.
245854_at	245854_at	At5g13490	5306	P	5035.7	P	5133.5	P	adenosine nucleotide translocator ; supported by cDNA: gi_15292846_gb_AY050857.1_
245855_at	245855_at	At5g13550	491.2	P	320.5	P	338	P	sulfate transporter ; supported by cDNA: gi_2626752_dbj_AB008782.1_AB008782
245856_at	245856_at	At5g28240	9.7	A	35.1	A	6.6	A	putative protein predicted proteins, Arabidopsis thaliana
245857_at	245857_at	At5g28270	2.8	A	8.4	A	41.8	A	putative protein various predicted proteins, Arabidopsis thaliana
245858_at	245858_at	At5g28280	11.7	A	8.4	A	29	A	CER1-like protein CER1-like, A.thaliana, ATCER1L19
245859_at	245859_at	At5g28290	10.4	A	5	A	5.7	A	serine (threonine) protein kinase - like serine (threonine) protein kinase, Mouse, PIR:JC7122
245860_at	245860_at	At5g28310	19.5	A	52.4	A	41.1	A	putative protein predicted proteins, Arabidopsis thaliana
245861_at	245861_at	At5g28300	6	A	61.8	A	12.2	A	GTL1 - like protein GTL1, Arabidopsis thaliana, EMBL:ATAJ3215; supported by cDNA: gi_14423451_gb_AF386963.1_AF386963
245862_at	245862_at	At5g01010	770.9	P	739.2	P	652.8	P	putative protein
245863_s_at	245863_s_at	At1g58050	1338.4	P	453.2	P	465.1	P	hypothetical protein contains similarity to maleless protein (mle) GI:157905 from [Drosophila melanogaster]
245864_at	245864_at	At1g58070	25.9	A	9.1	A	56.4	A	hypothetical protein predicted by genemark.hmm
245865_at	245865_at	At1g58025	92.2	A	13.6	A	19.9	A	hypothetical protein contains similarity to cell proliferation related protein GI:9931486 from [Mus musculus]
245866_s_at	245866_s_at	At1g57990	24.8	A	5.4	A	21.6	A	unknown protein
245867_at	245867_at	At1g58080	28.4	A	110.8	A	18.6	A	ATP phosphoribosyl transferase identical to ATP phosphoribosyl transferase GI:6683617 from [Arabidopsis thaliana];supported by full-length cDNA: Ceres:95544.
245868_at	245868_at	At1g58032	5480.1	P	4408.5	P	4005.1	P	hypothetical protein
245869_at	245869_at	At1g26330	33	A	7.4	A	30	A	hypothetical protein predicted by genemark.hmm
245870_at	245870_at	At1g26300	889.9	P	558.7	P	568.2	P	hypothetical protein similar to hypothetical protein GI:6358777 from [Arabidopsis thaliana]
245871_at	245871_at	At1g26290	76.2	A	30.3	A	34.6	A	hypothetical protein predicted by genemark.hmm
245872_at	245872_at	At1g26280	334	P	381.6	P	332.6	P	hypothetical protein contains similarity to arginine metabolism regulation protein i GI:695715 from [Saccharomyces cerevisiae]
245873_at	245873_at	At1g26260	19.5	A	72.4	A	5.9	A	bHLH transcription factor GBOF-1, putative similar to bHLH transcription factor GBOF-1 GI:5923912 from [Tulipa gesneriana]
245874_at	245874_at	At1g26250	3.1	A	8.5	A	4	A	unknown protein
245875_at	245875_at	At1g26240	15.8	A	6.2	A	19.2	A	hypothetical protein predicted by genemark.hmm
245876_at	245876_at	At1g26230	28.7	A	36	A	17.8	A	chaperonin precursor, putative similar to chaperonin precursor GI:806807 from [Pisum sativum]
245877_at	245877_at	At1g26220	10.2	A	37.2	A	8.2	A	unknown protein
245878_at	245878_at	At1g26190	71.4	A	79.8	M	122.8	P	hypothetical protein contains similarity to uridine kinase GI:6899310 from [Ureaplasma urealyticum]
245879_at	245879_at	At5g09420	84.2	A	12.9	A	42	A	putative subunit of TOC complex chloroplast gene Toc64 - Pisum sativum, EMBL:AF179282
245880_at	245880_at	At5g09430	2103.9	P	2186	P	1986.6	P	putative hydrolase EtbD1 - Rhodococcus sp., EMBL:AB004320
245881_at	245881_at	At5g09460	43.8	A	14.5	A	43.6	A	putative protein
245882_at	245882_at	At5g09470	116.8	A	203.5	A	211.2	A	mitochondrial carrier-like protein mitochondrial dicarboxylate carrier - Rattus norvegicus, EMBL:AJ223355
245883_at	245883_at	At5g09500	39.4	A	59.9	A	91.2	A	ribosomal protein S15-like ribosomal protein S15 - Arabidopsis thaliana, EMBL:Z23161
245884_at	245884_at	At5g09300	320.2	P	309.5	P	380.4	P	branched-chain alpha keto-acid dehydrogenase E1 alpha subunit-like protein branched-chain alpha keto-acid dehydrogenase E1 alpha subunit - Arabidopsis thaliana, EMBL:AF077955;supported by full-length cDNA: Ceres:3693.
245885_at	245885_at	At5g09440	2547.8	P	2534.4	P	2830.7	P	putative protein phi-1 - Nicotiana tabacum, EMBL:AB018441;supported by full-length cDNA: Ceres:38576.
245886_at	245886_at	At5g09510	13.6	A	120.5	A	118.2	A	ribosomal protein S15-like ribosomal protein S15 - Arabidopsis thaliana, EMBL:Z23161;supported by full-length cDNA: Ceres:164.
245887_at	245887_at	At5g09390	2137.2	P	1692.8	P	1335.2	P	putative protein CD2 cytoplasmic domain binding protein - Homo sapiens, EMBL:AF104222;supported by full-length cDNA: Ceres:13887.
245888_at	245888_at	At5g09450	156.4	P	100.1	A	84.5	A	putative protein DNA-binding protein - Triticum aestivum, EMBL:AF091837;supported by full-length cDNA: Ceres:249741.
245889_at	245889_at	At5g09480	30.2	A	3.4	A	33.2	A	PEE-rich protein ;supported by full-length cDNA: Ceres:20407.
245890_at	245890_at	At5g09490	10.5	A	91.4	A	23.4	A	ribosomal protein S15-like ribosomal protein S15 - Arabidopsis thaliana, EMBL:Z23161;supported by full-length cDNA: Ceres:29963.
245891_at	245891_at	At5g09220	110	P	64.8	A	73.3	A	amino acid transport protein AAP2 ;supported by full-length cDNA: Ceres:114602.
245892_at	245892_at	At5g09370	4325.2	P	4831.6	P	4108.6	P	putative lipid transfer protein lipid transfer protein - Hordeum vulgare, EMBL:AF109195;supported by full-length cDNA: Ceres:21969.
245893_at	245893_at	At5g09270	244.5	P	217.9	P	179.6	P	hypothetical protein ;supported by full-length cDNA: Ceres:38657.
245894_at	245894_at	At5g09310	181.8	P	146.3	A	148.4	P	putative protein ; supported by full-length cDNA: Ceres: 8242.
245895_at	245895_at	At5g09230	1300.6	P	579.9	P	645.9	P	SIR2-family protein sirtuin type 4 (SIRT4) - Homo sapiens, EMBL:AF083109; supported by cDNA: gi_15028032_gb_AY045873.1_
245896_at	245896_at	At5g09250	5687.3	P	5975.3	P	5592.3	P	putative transcriptional co-activator (KIWI) ; supported by cDNA: gi_2997683_gb_AF053302.1_AF053302
245897_at	245897_at	At5g09400	50.2	A	12.9	A	6.3	A	potassium transport protein-like several potassium transport proteins
245898_at	245898_at	At5g11015	35.9	A	14.9	A	55.4	A	ser/thr specific protein kinase-like protein protein kinase 1, Populus nigra, EMBL:AB041503
245899_at	245899_at	At5g11030	9.8	A	14.5	A	18.6	A	putative protein
245900_at	245900_at	At5g11040	144.6	P	183.4	P	233.7	P	putative protein predicted proteins, Arabidopsis thaliana
245901_at	245901_at	At5g11060	19.6	A	82	A	94.1	A	HOMEOBOX PROTEIN KNOTTED-1 LIKE 4 (KNAT4)
245902_at	245902_at	At5g11080	424.7	P	354.6	P	322.2	P	putative protein Scythe protein, Xenopus laevis, PIR:T30561
245903_at	245903_at	At5g11100	182.1	P	150.2	P	258.1	P	CLB1 - like protein CLB1 protein, Lycopersicon esculentum, PIR:T04143
245904_at	245904_at	At5g11110	8295	P	7372.7	P	8491.6	P	sucrose-phosphate synthase -like protein sucrose-phosphate synthase isoform 1, Citrus unshiu, PIR:S72648
245905_at	245905_at	At5g11090	312.3	P	519.9	P	457.6	P	putative protein predicted proteins, Arabidopsis thaliana;supported by full-length cDNA: Ceres:32958.
245906_at	245906_at	At5g11070	3064.6	P	3172.3	P	3077.2	P	putative protein ;supported by full-length cDNA: Ceres:42742.
245907_at	245907_at	At5g09340	236.2	P	80.6	A	70.2	A	ubiquitin-like protein ubiquitins - different species
245908_at	245908_at	At5g09360	82.9	A	16.2	A	23.4	A	laccase-like protein laccase - Acer pseudoplatanus, EMBL:AP12757
245909_at	245909_at	At5g09380	58.8	A	62.7	A	37.2	A	putative protein DNA-directed RNA polymerase III chain C53 - Saccharomyces cerevisiae, EMBL:X63501
245910_at	245910_at	At5g09410	730.2	P	793.4	P	768.7	P	putative protein ER66 - Lycopersicon esculentum, EMBL:AF096260
245911_at	245911_at	At5g19690	83.8	A	25.2	A	45.3	A	oligosaccharyl transferase STT3-like protein integral membrane protein 1/OLIGOSACCHARYL TRANSFERASE STT3 - Mus musculus, SISSPROT:P46978; supported by cDNA: gi_15215735_gb_AY050397.1_
245912_at	245912_at	At5g19600	339.8	P	88.6	A	275.1	M	putative protein sulfate transporter ATST1 [imported] - Arabidopsis thaliana, PIR:T48901; supported by cDNA: gi_14141683_dbj_AB061739.1_AB061739
245913_at	245913_at	At5g19860	1547.7	P	1303.4	P	1298.5	P	predicted protein
245914_at	245914_at	At5g19620	64.7	A	10.2	A	17.4	A	putative protein outer membrane protein (IAP75) - Pisum sativum, L36858; supported by cDNA: gi_13430585_gb_AF360205.1_AF360205
245915_s_at	245915_s_at	At5g19770	7705.9	P	10520.3	P	11435.2	P	tubulin alpha-5 chain-like protein tubulin alpha-5 chain - Arabidopsis thaliana, EMBL:M84698; supported by cDNA: gi_13605804_gb_AF367301.1_AF367301
245916_at	245916_at	At5g28720	46	A	30.6	A	15.5	A	putative protein
245917_at	245917_at	At5g28740	596.4	P	793.8	P	728.8	P	putative protein HCNP, Homo sapiens, EMBL:AF226051
245918_at	245918_at	At5g28760	55.1	A	25.9	A	64.6	A	putative protein various predicted proteins, Arabidopsis thaliana
245919_at	245919_at	At5g28780	12.5	A	2.8	A	80.2	A	putative protein various predicted proteins, Arabidopsis thaliana
245920_at	245920_at	At5g28790	79.4	A	32	A	8.7	A	putative protein
245921_at	245921_at	At5g28800	55.1	A	79.7	A	13.6	A	putative protein predicted protein, Arabidopsis thaliana
245922_at	245922_at	At5g28810	1.3	A	6	A	7	A	putative protein predicted proteins, Arabidopsis thaliana
245923_at	245923_at	At5g28820	56.1	A	26	A	77.9	P	putative protein predicted proteins, Arabidopsis thaliana
245924_at	245924_at	At5g28750	25.3	A	50.4	A	93.1	A	Tha4 protein - like Tha4 protein, Pisum sativum, EMBL:AF144708; supported by cDNA: gi_13358198_gb_AF325006.2_AF325006
245925_at	245925_at	At5g28770	167.9	P	228.6	A	200.6	P	bZIP transcription factor family protein similar to seed storage protein opaque-2(bZIP family)GI:168428 from Zea mays; supported by cDNA: gi_15450640_gb_AY052688.1_
245926_at	245926_at	At5g24740	138.9	A	154	A	204.3	A	VPS13 - like protein VPS13, Saccharomyces cerevisiae, EMBL:AF001317
245927_at	245927_at	At5g24750	26.8	A	21.3	A	81.9	A	sterol glucosyltransferase - like protein sterol glucosyltransferase (ugt52), Dictyostelium discoideum, EMBL:AF098916
245928_s_at	245928_s_at	At5g24780	56	A	124.2	A	48.8	A	vegetative storage protein Vsp1 ;supported by full-length cDNA: Ceres:32606.
245929_at	245929_at	At5g24760	14.2	A	138.8	A	52.3	A	alcohol dehydrogenase - like protein alcohol dehydrogenase 6, Vitis vinifera, EMBL:AF195866;supported by full-length cDNA: Ceres:155666.
245930_at	245930_at	At5g09240	184	P	70.8	A	12.9	A	transcriptional co-activator-like protein putative transcriptional co-activator (KIWI) - Arabidopsis thaliana, EMBL:AF053302
245931_at	245931_at	At5g09280	30699.2	P	36781.1	P	34344.3	P	major pollen allergen-like protein pollen major allergen, partial cup a 1 protein - Cupressus arizonica, EMBL:AJ243570
245932_at	245932_at	At5g09290	187.4	M	105.5	A	129	P	3 (2 ),5 -bisphosphate nucleotidase-like protein 3 (2 ),5 -bisphosphate nucleotidase - Arabidopsis thaliana, EMBL:AB019227
245933_at	245933_at	At5g09320	10.3	A	5.6	A	8.5	A	putative protein KIAA1521 - Homo sapiens, EMBL:AB040954
245934_at	245934_at	At5g09330	429.2	P	191.1	P	239	P	putative protein NAC1 - Medicago truncatula, EMBL:AF254124
245935_at	245935_at	At5g19840	67.6	A	139.5	A	12.3	A	hypothetical protein
245936_at	245936_at	At5g19850	28.2	A	64.7	A	72.9	P	putative protein predicted proteins - different species
245937_at	245937_at	At5g19750	4.7	A	4.2	A	16.6	A	putative protein 22kDa peroxisomal membrane protein-like - Homo sapiens, EMBL:AF250136;supported by full-length cDNA: Ceres:6789.
245938_at	245938_at	At5g19680	167.6	P	137.8	M	110	P	putative protein protein phosphatase-1 regulatory subunit 7 alpha2 - Homo sapiens, EMBL:AF067136;supported by full-length cDNA: Ceres:110392.
245939_at	245939_at	At5g19760	2067.2	P	1325.6	P	1698.1	P	oxoglutarate/malate translocator-like protein oxoglutarate/malate translocator - Solanum tuberosum, PIR:T07405;supported by full-length cDNA: Ceres:19510.
245940_at	245940_at	At5g19630	105.8	A	43	A	129.8	A	putative protein predicted proteins - different species; supported by full-length cDNA: Ceres: 28323.
245941_at	245941_at	At5g19820	640.4	P	458.2	P	531.3	P	putative protein karyopherin beta 3 - Homo sapiens, EMBL:U72761; supported by cDNA: gi_14334741_gb_AY035044.1_
245942_at	245942_at	At5g19490	9.7	A	9.8	A	6.7	A	putative protein transcription regulator, Homo sapiens, PIR:S70618
245943_at	245943_at	At5g19500	58.8	A	179.1	A	98.8	A	putative protein permease family protein TC0205, Chlamydia muridarum, PIR:D81729
245944_at	245944_at	At5g19520	7.3	A	4.2	A	6.6	A	putative protein various predicted proteins, Arabidopsis thaliana and S. pombe
245945_at	245945_at	At5g19560	21.2	A	3.6	A	22.1	A	putative protein various predicted proteins, Arabidopsis thaliana
245946_at	245946_at	At5g19580	67489	P	81082.8	P	71647.6	P	putative protein glyoxal oxidase precursor, Phanerochaete chrysosporium, PIR:A48296
245947_at	245947_at	At5g19530	6.5	A	4.1	A	12.4	A	spermine synthase (ACL5) ;supported by full-length cDNA: Ceres:3968.
245948_at	245948_at	At5g19540	45.8	A	58.2	A	5.2	A	putative protein ;supported by full-length cDNA: Ceres:120101.
245949_at	245949_at	At5g19510	374.3	P	422.3	P	436.2	P	elongation factor 1B alpha-subunit ;supported by full-length cDNA: Ceres:26936.
245950_at	245950_at	At5g19570	180.2	A	86.7	A	119.3	A	putative protein predicted protein, D. melanogaster; supported by cDNA: gi_15027866_gb_AY045790.1_
245951_at	245951_at	At5g19550	283.6	P	172.6	P	212.4	P	aspartate aminotransferase Asp2 ; supported by cDNA: gi_693689_gb_U15033.1_ATU15033
245952_at	245952_at	At5g28500	111.7	A	113.3	A	144.4	A	putative protein predicted proteins, Arabidopsis thaliana and Synechocystis sp.
245953_at	245953_at	At5g28520	10.4	A	8.1	A	5.9	A	myrosinase - binding protein - like probable myrosinase-binding protein, Brassica napus, EMBL:Y11483
245954_at	245954_at	At5g28530	477.3	P	394.4	P	470.9	P	far-red impaired response protein (FAR1) - like far-red impaired response protein (FAR1), Arabidopsis thaliana, EMBL:AF159587
245955_at	245955_at	At5g28510	14.1	A	16.2	A	17.5	A	hypothetical protein
245956_s_at	245956_s_at	At5g28540	33058.7	P	28292	P	27455.9	P	luminal binding protein ; supported by cDNA: gi_1303694_dbj_D84414.1_ATHBIPA
245957_at	245957_at	At5g19590	808.1	P	268.6	P	328.8	P	putative protein predicted proteins - Arabidopsis thaliana
245958_at	245958_at	At5g19610	1163.5	P	1267.6	P	1377.1	P	GNOM-like protein pattern-formation (GNOM) - Arabidopsis thaliana, EMBL:U36432
245959_at	245959_at	At5g19640	52.6	A	36.1	A	17.5	A	peptide transport protein-like peptide transport protein - Hordeum vulgare, EMBL:AF023472
245960_at	245960_at	At5g19660	260.2	A	139.8	M	205.6	A	subtilisin-like protein subtilisin/kexin isozyme SKI-1 precursor - Rattus norvegicus, EMBL:AF094821
245961_at	245961_at	At5g19670	7.1	A	58.2	A	15.2	A	putative protein predicted proteins - Arabidopsis thaliana
245962_at	245962_at	At5g19700	7.3	A	29.3	A	76.3	A	putative protein predicted proteins - Arabidopsis thaliana
245963_at	245963_at	At5g19710	72.5	A	28.5	A	42	A	putative protein HPt phosphotransmitter - Arabidopsis thaliana, EMBL:AB041766
245964_at	245964_at	At5g19720	49.7	A	32.2	A	44.6	A	putative protein C-terminus of glutamine--tRNA ligase - Lupinus luteus, EMBL:X91787
245965_at	245965_at	At5g19730	9	A	126.1	A	96.9	A	pectin methylesterase-like protein pectin methyl esterase - Solanum tuberosum, EMBL:AF152172
245966_at	245966_at	At5g19790	6.1	A	10.6	A	20.1	A	AP2 domain containing protein RAP2.11
245967_at	245967_at	At5g19800	41.5	A	7.3	A	14.6	A	proline-rich protein extensins
245968_at	245968_at	At5g19810	19.1	A	34.3	A	26.7	A	proline-rich protein extensins
245969_at	245969_at	At5g19830	105.7	A	150.8	A	95.2	A	putative protein nuclear gene for chloroplast product CRS2 - Zea mays, EMBL:AF225708
245970_at	245970_at	At5g20710	133.9	A	42.6	A	81.9	A	beta-galactosidase ; supported by cDNA: gi_15027868_gb_AY045791.1_
245971_at	245971_at	At5g20730	54.9	A	18.1	A	10	A	putative protein ; supported by cDNA: gi_4103242_gb_AF022368.1_AF022368
245972_at	245972_at	At5g20680	1204.6	P	1309.3	P	1182.9	P	putative protein predicted proteins, Arabidopsis thaliana; supported by cDNA: gi_15810384_gb_AY056231.1_
245973_at	245973_at	At5g32490	2.3	A	2.1	A	8.7	A	putative protein predicted proteins, Arabidopsis thaliana
245974_at	245974_at	At5g32510	78.5	A	86.1	A	95.9	A	putative protein
245975_at	245975_at	At5g13070	830.8	P	651.9	P	588.8	P	putative protein CGI-107 protein - Homo sapiens, EMBL:AF151865
245976_at	245976_at	At5g13080	5.2	A	226.7	P	218.7	P	WRKY-like protein WRKY DNA binding protein - Solanum tuberosum, EMBL:AJ278507
245977_at	245977_at	At5g13110	338.8	P	267	P	210.4	P	glucose-6-phosphate 1-dehydrogenase
245978_at	245978_at	At5g13130	58.8	A	31.9	A	38.2	A	putative protein MORC microrchidia - Homo sapiens, EMBL:AF084946
245979_at	245979_at	At5g13150	6118.5	P	6165.2	P	6732.6	P	putative protein leucine zipper-containing protein - Lycopersicon esculentum, EMBL:Z12127
245980_at	245980_at	At5g13140	30.2	A	12.4	A	82.5	A	putative protein ;supported by full-length cDNA: Ceres:14064.
245981_at	245981_at	At5g13100	12297.9	P	12714.5	P	13716.1	P	putative protein ;supported by full-length cDNA: Ceres:39563.
245982_at	245982_at	At5g13170	9	A	115.8	A	82.7	A	senescence-associated protein (SAG29) ;supported by full-length cDNA: Ceres:38843.
245983_at	245983_at	At5g13050	156.2	P	206.1	P	160.5	P	5-formyltetrahydrofolate cyclo-ligase-like protein 5-formyltetrahydrofolate cyclo-ligase (EC 6.3.3.2) - Homo sapiens, EMBL:L38928;supported by full-length cDNA: Ceres:106858.
245984_at	245984_at	At5g13090	115.3	A	84.1	A	66	A	putative protein predicted proteins - Arabidopsis thaliana;supported by full-length cDNA: Ceres:2537.
245985_at	245985_at	At5g13120	64.3	A	62.2	A	9.1	A	peptidylprolyl isomerase-like protein chloroplast stromal cyclophilin (ROC4) - Arabidopsis thaliana, EMBL:L14845;supported by full-length cDNA: Ceres:620.
245986_at	245986_at	At5g13160	703.1	P	499.9	P	538.7	P	protein kinase-like protein kinase 1 PnPK1 - Populus nigra, EMBL:AB041503; supported by cDNA: gi_13937146_gb_AF372927.1_AF372927
245987_at	245987_at	At5g13180	10.6	A	125.8	P	21.4	A	NAM-like protein hypothetical protein SENU5, senescence up-regulated - Lycopersicon esculentum, EMBL:Z75524; supported by cDNA: gi_14326559_gb_AF385734.1_AF385734
245988_at	245988_at	At5g20610	192.6	P	110.2	A	160.8	A	putative protein predicted protein, Plasmodium falciparum
245989_s_at	245989_s_at	At5g20620	1980.3	P	1807.2	P	2340.3	P	polyubiquitin (UBQ4) identical to GI:17677
245990_at	245990_at	At5g20640	6	A	47.1	A	27.8	A	putative protein predicted proteins, Arabidopsis thaliana
245991_at	245991_at	At5g20660	161.9	A	212.5	P	182.2	P	24 kDa vacuolar protein - like 24 kDa vacuolar protein VP24, Ipomoea batatas, EMBL:AB025531
245992_at	245992_at	At5g20690	10496.6	P	12830.1	P	11829.3	P	receptor protein kinase - like receptor-like protein kinase PRK1, tomato, PIR:T07865
245993_at	245993_at	At5g20700	83.3	A	9.5	A	34	A	putative protein predicted proteins, Arabidopsis thaliana
245994_at	245994_at	At5g20760	66	A	144.2	A	35.8	A	putative protein various predicted proteins, Arabidopsis thaliana
245995_at	245995_at	At5g20770	7.5	A	16.2	A	20.4	A	putative protein various predicted proteins, Arabidopsis thaliana
245996_at	245996_at	At5g20800	5.2	A	27.5	A	38.8	A	putative protein predicted non-LTR reverse ranscriptase sequence fragments
245997_at	245997_at	At5g20810	3799.9	P	8594.2	P	6441.2	P	putative protein saur1 protein, Zea mays, EMBL:AF148498
245998_at	245998_at	At5g20830	70.7	A	130.7	A	89.4	A	sucrose-UDP glucosyltransferase
245999_at	245999_at	At5g20650	887	P	876.4	P	624.6	P	putative protein predicted protein, Arabidopsis thaliana;supported by full-length cDNA: Ceres:29453.
246000_at	246000_at	At5g20820	65.4	A	4.5	A	5.6	A	putative protein predicted proteins, Arabidopsis thaliana;supported by full-length cDNA: Ceres:19897.
246001_at	246001_at	At5g20790	11.3	A	131.9	A	110	A	putative protein predicted protein, Arabidopsis thaliana;supported by full-length cDNA: Ceres:267031.
246002_at	246002_at	At5g20740	5.1	A	4.3	A	11.5	A	ripening-related protein - like grip28 ripening-related protein, Vitis vinifera, EMBL:VVI237985;supported by full-length cDNA: Ceres:1710.
246003_at	246003_at	At5g20720	185.7	P	152.4	A	93.8	A	chloroplast Cpn21 protein ; supported by cDNA: gi_14334611_gb_AY034979.1_
246004_at	246004_at	At5g20630	54.9	A	112.4	A	4.2	A	germin-like protein ; supported by cDNA: gi_14517363_gb_AY039516.1_
246005_at	246005_at	At5g08415	443.1	P	538.7	P	532.5	P	lipoic acid synthase - like protein lipoic acid synthase, Arabidopsis thaliana, PIR:T44259;supported by full-length cDNA: Ceres:152427.
246006_at	246006_at	At5g08290	3863.8	P	3237.5	P	2888.6	P	putative protein DIM1 protein, Homo sapiens, EMBL:AF023611; supported by full-length cDNA: Ceres: 12591.
246007_at	246007_at	At5g08410	227.5	P	312.9	P	361.3	P	Expressed protein ; supported by full-length cDNA: Ceres: 31366.
246008_at	246008_at	At5g08320	4.6	A	40.2	A	6	A	putative protein predicted proteins, Homo sapiens and Caenorhabditis elegans; supported by full-length cDNA: Ceres: 31390.
246009_at	246009_at	At5g08335	194.8	P	189.7	P	171	P	Expressed protein ; supported by cDNA: gi_14334709_gb_AY035028.1_
246010_at	246010_at	At5g08440	145.3	A	125.1	A	70.9	A	putative protein predicted proteins, Arabidopsis thaliana; supported by cDNA: gi_13877640_gb_AF370521.1_AF370521
246011_at	246011_at	At5g08330	6.9	A	9.3	A	11.7	A	putative protein auxin-induced basic helix-loop-helix transcription factor, Gossypium hirsutum, EMBL:AF165924; supported by cDNA: gi_15724267_gb_AF412074.1_AF412074
246012_at	246012_at	At5g10650	919	P	717	P	677.3	P	Pspzf zinc finger protein - like DNA binding zinc finger protein (Pspzf), Pisum sativum, EMBL:AB018422
246013_at	246013_at	At5g10660	2846.6	P	2841.3	P	2842.5	P	vacuolar calcium binding protein - like vacuolar calcium binding protein, Raphanus sativus, EMBL:AB035900
246014_at	246014_at	At5g10680	49.8	A	16.8	A	24.6	A	putative protein
246015_at	246015_at	At5g10700	223.3	P	180	P	234.1	P	putative protein predicted proteins, Drosophila melanogaster and Caenorhabditis elegans
246016_at	246016_at	At5g10720	51.2	A	5.1	A	9.7	A	histidine kinase - like protein sensory transduction histidine kinase slr1759, Synechocystis sp., PIR:S75142
246017_at	246017_at	At5g10730	940	P	1266.7	P	1307.1	P	putative protein predicted proteins from various species;supported by full-length cDNA: Ceres:10217.
246018_at	246018_at	At5g10695	1869.9	P	1838.9	P	1502	P	Expressed protein ; supported by full-length cDNA: Ceres: 103171.
246019_at	246019_at	At5g10690	122.1	P	91.2	A	18.5	A	putative protein predicted proteins, Arabidopsis thaliana and Oryza sativa;supported by full-length cDNA: Ceres:254744.
246020_at	246020_at	At5g10710	271.3	P	257.6	M	203.8	A	putative protein ; supported by cDNA: gi_13430737_gb_AF360281.1_AF360281
246021_at	246021_at	At5g21100	894.5	P	1310.5	P	1213.6	P	ascorbate oxidase-like protein ascorbate oxidase - Brassica juncea, EMBL:AF206721
246022_at	246022_at	At5g21110	38.9	A	4	A	3.8	A	putative protein predicted protein - Arabidopsis thaliana, EMBL:AL163852
246023_at	246023_at	At5g21120	313.3	P	754.4	P	744.7	P	ethylene-insensitive3-like2 (EIL2)
246024_at	246024_at	At5g21130	77.3	A	126	M	94.2	A	putative protein predicted protein - Arabidopsis thaliana, EMBL:AC005623
246025_at	246025_at	At5g21150	1253.9	P	1142.4	P	1164.2	P	zwille/pinhead-like protein GERp95 - Rattus norvegicus, EMBL:AF195534
246026_at	246026_at	At5g21070	82	A	16.4	A	100.2	A	putative protein predicted protein - Oryza sativa - TREMBL:AP001072_3;supported by full-length cDNA: Ceres:3689.
246027_at	246027_at	At5g21060	47.9	A	79.1	A	37.8	A	homoserine dehydrogenase-like protein thrA bifunctional enzyme - Escherichia coli, PIR:B64720;supported by full-length cDNA: Ceres:123335.
246028_at	246028_at	At5g21170	904.9	P	784.9	P	770.1	P	AKIN beta1 ; supported by full-length cDNA: Ceres: 41668.
246029_at	246029_at	At5g21090	470	P	697.9	P	553.7	P	leucine-rich repeat protein ; supported by cDNA: gi_13358181_gb_AF324989.2_AF324989
246030_at	246030_at	At5g21105	191.6	M	131	A	250.3	P	Expressed protein genomic sequence interrupted by a stop codon in exon 4, resequencing necessary to remove ambiguity; otherwise supported by cDNA: gi_15215753_gb_AY050406.1_
246031_at	246031_at	At5g21160	111	M	86.9	A	187.8	A	putative protein KIAA0731 - Homo sapiens, EMBL:AB018274; supported by cDNA: gi_15450526_gb_AY052365.1_
246032_s_at	246032_s_at	At5g32480	8.7	A	10.8	A	30.6	A	putative protein
246033_at	246033_at	At5g08280	72.7	A	64.6	A	102.5	A	hydroxymethylbilane synthase ;supported by full-length cDNA: Ceres:3051.
246034_at	246034_at	At5g08350	9.7	A	5.4	A	105.1	A	putative protein FH protein interacting protein FIP1, Arabidopsis thaliana, EMBL:AF174428;supported by full-length cDNA: Ceres:19508.
246035_at	246035_at	At5g08300	165.8	P	147.6	P	131.5	A	succinyl-CoA-ligase alpha subunit ;supported by full-length cDNA: Ceres:10292.
246036_at	246036_at	At5g08370	9.4	A	16	A	7.5	A	alpha-galactosidase - like protein alpha-galactosidase, coffee, PIR:T50781;supported by full-length cDNA: Ceres:156141.
246037_at	246037_at	At5g19420	230.9	P	254.1	P	159.2	P	putative protein predicted chromosome condensation regulator protein, Arabidopsis thaliana, EMBL:AB025608
246038_s_at	246038_s_at	At5g19470	44.8	A	89.4	A	108.2	A	putative protein thiamin pyrophosphokinase, Schizosaccharomyces pombe, PIR:S52350
246039_at	246039_at	At5g19480	1158.5	P	937.5	P	1259.6	P	putative protein serine-arginine-rich splicing regulatory protein SRRP86, Rattus norvegicus, EMBL:AF234765
246040_at	246040_at	At5g19370	22.1	A	89.3	M	122.3	P	peptidyl-prolyl cis-trans isomerase - like protein peptidyl-prolyl cis-trans isomerase A.thaliana;supported by full-length cDNA: Ceres:25533.
246041_at	246041_at	At5g19290	9876.5	P	11075.8	P	9982.7	P	phospholipase - like protein various predicted phospholipase proteins;supported by full-length cDNA: Ceres:253499.
246042_at	246042_at	At5g19440	290.3	P	404.8	P	391.9	P	cinnamyl-alcohol dehydrogenase - like protein cinnamyl-alcohol dehydrogenase, apple tree, PIR:T16995;supported by full-length cDNA: Ceres:6748.
246043_at	246043_at	At5g19380	45	A	88.1	A	81.9	A	putative protein predicted protein, Arabidopsis thaliana, EMBL:ATZ86095;supported by full-length cDNA: Ceres:158575.
246044_at	246044_at	At5g19450	114.5	P	93.5	A	120.6	P	calcium-dependent protein kinase ; supported by cDNA: gi_836941_gb_U20624.1_ATU20624
246045_at	246045_at	At5g19430	642.7	P	925.9	P	783.2	P	putative protein predicted proteins, Drosophila melanagoster and Homo sapiens; supported by cDNA: gi_13605552_gb_AF361602.1_AF361602
246046_at	246046_at	At5g28860	98.6	A	36.8	A	87.2	A	putative protein predicted proteins, Arabidopsis thaliana
246047_at	246047_at	At5g28870	11.1	A	14.4	A	34.6	A	putative protein predicted proteins, Arabidopsis thaliana
246048_at	246048_at	At5g28880	3.5	A	11.8	A	51.5	A	putative protein
246049_at	246049_at	At5g28890	56.9	A	68.7	A	90.3	A	putative protein predicted proteins, Arabidopsis thaliana
246050_s_at	246050_s_at	At5g28900	126.6	P	128.2	A	167.1	P	protein phosphatase 2A regulatory subunit B-like protein protein phosphatase 2A 62 kDa B regulatory subunit, Arabidopsis thaliana, TREMBL:AF165429
246051_at	246051_at	At5g28840	1998.5	P	1674.5	P	1980.7	P	epimerase/dehydratase - like protein dTDP-glucose 4-6-dehydratase homolog D18, Arabidopsis thaliana, PIR:S58282; supported by cDNA: gi_16323112_gb_AY057660.1_
246052_at	246052_at	At5g08310	125.7	P	159.1	P	84.8	A	putative protein predicted proteins, Arabidopsis thaliana and others
246053_at	246053_at	At5g08340	160.1	P	179.7	P	67.2	A	putative protein farnesyl cysteine carboxyl methyltransferase, Rattus norvegicus, EMBL:AF075595
246054_at	246054_at	At5g08360	144.8	A	131.8	A	230.6	P	putative protein predicted proteins, Arabidopsis thaliana
246055_at	246055_at	At5g08380	60.2	A	74.2	A	40	A	alpha-galactosidase - like protein alpha-galactosidase, coffee, PIR:T50781
246056_at	246056_at	At5g08390	17.3	A	19	A	4.4	A	katanin p80 subunit - like protein katanin p80 subunit, Strongylocentrotus purpuratus, EMBL:AF052433
246057_at	246057_at	At5g08400	75.4	A	140.3	A	11.6	A	putative protein predicted proteins, Arabidopsis thaliana and Synechocystis sp.
246058_at	246058_at	At5g08430	273.9	P	333.3	P	227.6	P	putative protein predicted proteins, Arabidopsis thaliana
246059_at	246059_at	At5g08450	2653.7	P	3139.6	P	3503.2	P	putative protein KED, Nicotiana tabacum, EMBL:AB009883
246060_at	246060_at	At5g08420	78.2	A	98.5	A	110.8	A	rev interacting protein mis3 - like rev interacting protein mis3, Schizosaccharomyces pombe, PIR:T39981;supported by full-length cDNA: Ceres:3036.
246061_at	246061_at	At5g19320	13	A	82.1	A	89.9	A	RAN GTPase activating protein 2 ; supported by cDNA: gi_6708467_gb_AF214560.1_AF214560
246062_at	246062_at	At5g19330	246.8	P	217.7	P	121.3	M	putative protein VAC8 protein, Saccharomyces cerevisiae, PIR:S50446
246063_at	246063_at	At5g19340	89.6	A	29.4	A	36.9	A	putative protein predicted proteins, Arabidopsis thaliana
246064_at	246064_at	At5g19350	90.6	A	111.5	A	50.5	A	DNA binding protein ACBF - like DNA binding protein ACBF, Nicotiana tabacum, PIR:T03934
246065_at	246065_at	At5g19360	22775.2	P	16615.7	P	18542.9	P	calcium-dependent protein kinase - like calcium-dependent protein kinase Marchantia polymorpha, EMBL:AB017515
246066_at	246066_at	At5g19400	602	P	960.2	P	899	P	putative protein predicted proteins, Homo sapiens
246067_at	246067_at	At5g19410	44.6	A	32.1	A	66.1	A	membrane transporter - like protein white membrane transporter, Bactrocera tryoni, EMBL:U97104
246068_at	246068_at	At5g20290	328.8	P	293.3	P	267.8	P	putative protein ribosomal protein S8 - Zea mays, PIR:T04088;supported by full-length cDNA: Ceres:29997.
246069_at	246069_at	At5g20220	31.6	A	41.4	A	4.2	A	zinc finger protein ;supported by full-length cDNA: Ceres:152664.
246070_at	246070_at	At5g20160	111.4	P	137.1	A	162.3	A	ribosomal protein L7Ae-like NHP2/RS6 FAMILY PROTEIN YEL026W HOMOLOG - Homo sapiens, EMBL:D50420;supported by full-length cDNA: Ceres:30288.
246071_at	246071_at	At5g20150	1048	P	718.7	P	796.7	P	ids4-like protein ids-4 protein - Hordeum vulgare, PIR:T05905;supported by full-length cDNA: Ceres:32843.
246072_at	246072_at	At5g20240	59.8	A	42.1	A	96.6	A	PISTILLATA ; supported by full-length cDNA: Ceres: 1480.
246073_at	246073_at	At5g20180	242.4	P	437.5	P	377.1	P	ribosomal protein L36-like ribosomal protein L36 - Synechocystis sp., PIR:S77481;supported by full-length cDNA: Ceres:28109.
246074_at	246074_at	At5g20130	17.6	A	70.4	A	23.2	A	hypothetical protein ; supported by full-length cDNA: Ceres: 38847.
246075_at	246075_at	At5g20410	25179.9	P	21492.8	P	19423	P	monogalactosyldiacylglycerol synthase ; supported by cDNA: gi_13937144_gb_AF372926.1_AF372926
246076_at	246076_at	At5g20280	62.5	A	50.2	A	144.2	A	sucrose-phosphate synthase-like protein sucrose-phosphate synthase (EC 2.4.1.14) isoform 1 - Citrus unshiu, EMBL:AB005023; supported by cDNA: gi_14532573_gb_AY039911.1_
246077_at	246077_at	At5g20420	11.3	A	12.1	A	6	A	putative protein XNP-1, Caenorhabditis elegans, EMBL:AF134186
246078_s_at	246078_s_at	At5g20440	103.4	P	100.6	A	81.8	A	putative protein probable mitosis and maintenance of ploidy protein, Schizosaccharomyces pombe, PIR:T40465
246079_at	246079_at	At5g20450	42	A	90.7	A	3.7	A	putative protein unconventional myosin heavy chain, Zea mays, PIR:A59310
246080_at	246080_at	At5g20460	1146.6	P	1061.2	P	1255.4	P	putative protein
246081_s_at	246081_s_at	At5g20470	14	A	36.7	A	14.6	A	myosin-like protein unconventional myosin heavy chain, Zea mays, PIR:A59310
246082_at	246082_at	At5g20480	14.6	A	26.5	A	62.8	A	receptor protein kinase - like protein kinase Xa21, Oryza sativa, PIR:A57676
246083_at	246083_at	At5g20510	37.2	A	41.5	A	38.5	A	zinc finger protein - like probable zinc finger protein, alfalfa, PIR:T09646
246084_at	246084_at	At5g20530	4.3	A	86.6	A	50.8	A	putative protein predicted proteins, Arabidopsis thaliana
246085_at	246085_at	At5g20540	88.2	M	55.4	A	112.4	M	putative protein predicted proteins, Arabidopsis thaliana
246086_at	246086_at	At5g20560	83.4	A	149.9	A	35.3	A	beta-1,3-glucanase - like protein beta-1,3-glucanase bg4 and bg5, A.thaliana, EMBL:ATCBG45
246087_at	246087_at	At5g20580	504.7	P	452.2	P	581.4	P	putative protein predicted protein, Arabidopsis thaliana
246088_at	246088_at	At5g20600	444.7	P	291.3	P	350.2	P	putative protein
246089_at	246089_at	At5g20570	2264.4	P	2176.2	P	2462.1	P	ring-box protein - like ring-box protein-like, Homo sapiens, PIR:T51146;supported by full-length cDNA: Ceres:29408.
246090_at	246090_at	At5g20520	1199.2	P	788.6	P	818.3	P	putative protein BEM46 bem1/bud5 suppressor, Schizosaccharomyces pombe, bem1/bud5 suppressor, EMBL:SP29892;supported by full-length cDNA: Ceres:36716.
246091_at	246091_at	At5g20590	355.3	P	293.2	P	265	P	putative protein various predicted proteins, Arabidopsis thaliana;supported by full-length cDNA: Ceres:22963.
246092_at	246092_at	At5g20500	246.1	P	230.1	P	264	P	glutaredoxin ;supported by full-length cDNA: Ceres:115597.
246093_at	246093_at	At5g20550	11.8	A	7.2	A	5	A	ethylene-forming-enzyme-like dioxygenase - like ethylene-forming-enzyme-like dioxygenase, Prunus armeniaca, EMBL:U97530;supported by full-length cDNA: Ceres:12971.
246094_at	246094_at	At5g19300	15.2	A	89.4	A	13.5	A	putative protein predicted proteins, H. sapiens, D. melanogaster and others
246095_at	246095_at	At5g19310	1786.1	P	1652.8	P	1777.5	P	homeotic gene regulator - like protein homeotic gene regulator, mouse, PIR:I53078
246096_at	246096_at	At5g20330	8051.9	P	8000	P	6618.4	P	beta-1,3-glucanase bg4 ;supported by full-length cDNA: Ceres:14120.
246097_at	246097_at	At5g20270	97.4	A	52.9	A	62	A	putative protein CGI-45 protein - Homo sapiens, EMBL:AF151803;supported by full-length cDNA: Ceres:24749.
246098_at	246098_at	At5g20400	44.4	A	100.3	A	10.5	A	ethylene-forming-enzyme-like dioxygenase-like protein ethylene-forming-enzyme-like dioxygenase - Prunus armeniaca, EMBL:U97530;supported by full-length cDNA: Ceres:38372.
246099_at	246099_at	At5g20230	51716.3	P	44780.7	P	38534.2	P	blue copper binding protein ;supported by full-length cDNA: Ceres:7767.
246100_at	246100_at	At5g32570	22	A	65.1	A	2.7	A	putative protein predicted protein, Arabidopsis thaliana
246101_at	246101_at	At5g32580	35.2	A	70.6	A	25.4	A	putative protein
246102_at	246102_at	At5g32590	10.9	A	10	A	38.3	A	putative protein various predicted proteins, Arabidopsis thaliana
246103_at	246103_at	At5g28640	51.4	A	89.2	A	44.9	A	putative protein
246104_at	246104_at	At5g28650	81.6	A	65.1	A	29.1	A	DNA-binding protein - like DNA-binding protein WRKY3, parsley, PIR:S72445
246105_at	246105_at	At5g28670	2.3	A	8.1	A	3.4	A	putative protein predicted helicase proteins, Arabidopsis thaliana
246106_at	246106_at	At5g28680	28329.2	P	32045.6	P	30094.1	P	receptor-like protein kinase precursor - like receptor-like protein kinase, Madagascar periwinkle, PIR:T10060
246107_at	246107_at	At5g28700	88.7	A	19.4	A	62.9	A	putative protein various predicted proteins, Arabidopsis thaliana and others
246108_at	246108_at	At5g28630	53.6	A	14.1	A	7.6	A	putative protein retinal glutamic acid-rich protein, bovine, PIR:A40437;supported by full-length cDNA: Ceres:24151.
246109_at	246109_at	At5g20120	504.8	P	294.5	P	371.3	P	hypothetical protein (fragment?)
246110_at	246110_at	At5g20140	16.7	A	3.6	A	26.4	A	putative protein predicted proteins - Arabidopsis thaliana
246111_at	246111_at	At5g20170	175.7	P	211.5	P	143.7	P	putative protein
246112_at	246112_at	At5g20200	143.3	P	122.9	A	51.1	A	putative protein predicted proteins - Arabidopsis thaliana
246113_at	246113_at	At5g20210	111.4	A	12.3	A	60.3	A	putative protein predicted proteins - Arabidopsis thaliana
246114_at	246114_at	At5g20250	463.9	P	556.1	P	676.5	P	seed imbitition protein-like seed imbitition protein Sip1 - Hordeum vulgare, EMBL:M77475
246115_at	246115_at	At5g20300	2275.9	P	2202.9	P	2066.3	P	putative protein chloroplast outer envelope protein OEP86 precursor -Pisum sativum, PIR:S49910
246116_at	246116_at	At5g20310	14365.3	P	17499.5	P	16841.8	P	putative protein predicted proteins - Arabidopsis thaliana
246117_at	246117_at	At5g20320	91.8	A	7.7	A	8.4	A	CAF-like protein CAF protein - Arabidopsis thaliana, EMBL:AF187317
246118_at	246118_at	At5g20340	3808.5	P	3318.6	P	3003.3	P	beta-1,3-glucanase bg5
246119_at	246119_at	At5g20350	2945.2	P	2021.1	P	1935.3	P	ankyrin-repeat protein patsas protein - Drosophila melanogaster, EMBL:AF163011
246120_at	246120_at	At5g20360	395.9	P	442.2	P	575.1	P	tetratricopeptide repeat protein tetratricopeptide repeat protein - Homo sapiens, EMBL:U46570
246121_at	246121_at	At5g20370	524.6	P	430.3	P	385.1	P	putative protein motif in PGPS/D10 - Petunia x hybrida, EMBL:AF049926
246122_at	246122_at	At5g20380	34.1	A	8.3	A	31.6	A	putative protein brain specific Na+-dependent inorganic phosphate cotransporter - Rattus norvegicus, EMBL:U07609
246123_at	246123_at	At5g20390	5762.5	P	6609.2	P	5114.8	P	beta-1,3-glucanase-like protein beta-1,3-glucanase bg4 - A.thaliana, EMBL:X79694
246124_at	246124_at	At5g20060	807.3	P	457.4	P	574.4	P	putative protein acyl-protein thioesterase, Homo sapiens, EMBL:AF098668;supported by full-length cDNA: Ceres:42475.
246125_at	246125_at	At5g19875	8.2	A	26.8	A	74.5	A	Expressed protein ; supported by full-length cDNA: Ceres: 59.
246126_at	246126_at	At5g20070	128	M	152.2	A	94.8	A	putative protein predicted protein, Oryza sativa; supported by cDNA: gi_15146277_gb_AY049280.1_
246127_s_at	246127_s_at	At5g32530	45.8	A	6.7	A	16.3	A	putative protein
246128_at	246128_at	At5g32540	10.1	A	5.4	A	14.8	A	putative protein predicted proteins, Arabidopsis thaliana
246129_at	246129_at	At5g32550	6.2	A	8.1	A	21.3	A	putative protein predicted protein, Arabidopsis thaliana
246130_at	246130_at	At5g32560	31.9	A	9.7	A	14.4	A	putative protein various predicted proteins, Arabidopsis thaliana
246131_at	246131_at	At5g20990	328.9	P	393.5	P	355.2	P	MOLYBDOPTERIN BIOSYNTHESIS CNX1 PROTEIN ; supported by cDNA: gi_1263313_gb_L47323.1_ATHCNX1R
246132_at	246132_at	At5g20850	92.1	A	112	M	36.3	A	Rad51-like protein ; supported by cDNA: gi_1706946_gb_U43528.1_ATU43528
246133_at	246133_at	At5g20960	77.1	A	50.6	A	27.7	A	aldehyde oxidase AAO1 ; supported by cDNA: gi_2792301_gb_AF039895.1_AF039895
246134_at	246134_at	At5g20930	136.3	P	168.7	P	155.2	P	protein kinase tousled ; supported by cDNA: gi_433051_gb_L23985.1_ATHTGPA
246135_at	246135_at	At5g20885	34.3	A	104.7	A	125.4	A	putative protein non-consensus donor splice site GA at exon 1; predicted proteins, Arabidopsis thaliana; supported by cDNA: gi_16209695_gb_AY057610.1_
246136_at	246136_at	At5g28470	36.2	A	106.2	A	61.3	A	peptide transporter - like protein peptide transport protein, Hordeum vulgare, EMBL:AF023472
246137_at	246137_at	At5g28490	2.9	A	9.3	A	76.5	A	putative protein predicted proteins, Arabidopsis thaliana
246138_at	246138_at	At5g19870	5	A	88.9	A	83.9	P	putative protein predicted proteins from various organisms
246139_at	246139_at	At5g19900	3785.2	P	3504.1	P	4331.5	P	putative protein predicted protein, Drosophila melanogaster
246140_at	246140_at	At5g19910	740.7	P	970.1	P	909.9	P	SOH1 - like protein SOH1, Saccharomyces cerevisiae, PIR:S47895
246141_at	246141_at	At5g19920	10.4	A	15	A	40.8	A	TipD - like WD repeat protein TipD, Dictyostelium discoideum, PIR:T08602
246142_at	246142_at	At5g19970	17.4	A	37	A	9.5	A	putative protein
246143_at	246143_at	At5g19980	62.6	A	84.1	A	88	P	lipophosphoglycan biosynthetic protein - like lipophosphoglycan biosynthetic protein (LPG2), Leishmania donovani, TREMBL:LD26175
246144_at	246144_at	At5g20110	63.2	A	140.2	A	5.3	A	dynein light chain - like protein dynein light chain LC6, Anthocidaris crassispina, EMBL:AB004830
246145_at	246145_at	At5g19880	47.2	A	62.9	A	26.9	A	peroxidase peroxidase, Lycopersicon esculentum, PIR:S32768;supported by full-length cDNA: Ceres:100990.
246146_at	246146_at	At5g20050	19	A	57.7	A	104.7	A	receptor-like protein kinase - like protein receptor-like protein kinase, Arabidopsis thaliana, EMBL:M84659;supported by full-length cDNA: Ceres:206658.
246147_s_at	246147_s_at	At5g20000	717.1	P	825	P	1055.7	P	26S proteasome AAA-ATPase subunit RPT6a - like protein 26S proteasome AAA-ATPase subunit RPT6a, Arabidopsis thaliana, EMBL:AF123395;supported by full-length cDNA: Ceres:36085.
246148_at	246148_at	At5g19960	59.1	A	8.2	A	13.7	A	glycine-rich RNA-binding protein - like glycine-rich RNA-binding protein (GRRBP2), Euphorbia esula, TREMBL:AF031933;supported by full-length cDNA: Ceres:152904.
246149_at	246149_at	At5g19890	41.8	A	109.3	A	111.9	P	peroxidase ATP N ;supported by full-length cDNA: Ceres:40493.
246150_at	246150_at	At5g19930	687.3	P	551.1	P	525.7	P	putative protein predicted proteins from various organisms;supported by full-length cDNA: Ceres:12566.
246151_at	246151_at	At5g19950	8.5	A	35.4	A	9.9	A	putative protein predicted proteins from various organisms;supported by full-length cDNA: Ceres:950.
246152_at	246152_at	At5g20040	8.8	A	11	A	34.3	A	IPP transferase - like protein tRNA delta(2)-isopentenylpyrophosphate transferase (IPP transferase), Pseudomonas putida, EMBL:AF016312;supported by full-length cDNA: Ceres:19250.
246153_s_at	246153_s_at	At5g20010	10993.3	P	10193.8	P	11914.8	P	RAN1 small Ras-like GTP-binding nuclear protein (Ran-1) ;supported by full-length cDNA: Ceres:9480.
246154_at	246154_at	At5g19940	22.7	A	14.6	A	5.6	A	putative protein predicted protein, Arabidopsis thaliana;supported by full-length cDNA: Ceres:32193.
246155_at	246155_at	At5g20030	70.6	A	18.9	A	82.8	A	putative protein predicted proteins, Arabidopsis thaliana;supported by full-length cDNA: Ceres:142064.
246156_at	246156_at	At5g20090	920.9	P	917.4	P	1058.3	P	putative protein predicted proteins from various species; supported by full-length cDNA: Ceres: 17786.
246157_at	246157_at	At5g20080	121.4	A	107.8	A	78.9	A	cytochrome-b5 reductase - like protein cytochrome-b5 reductase, Saccharomyces cerevisiae, PIR:S37800;supported by full-length cDNA: Ceres:33544.
246158_at	246158_at	At5g19855	116.8	A	102.4	A	174.5	P	Expressed protein ; supported by full-length cDNA: Ceres: 42402.
246159_at	246159_at	At5g20935	14.6	A	79	A	65	A	Expressed protein ; supported by full-length cDNA: Ceres: 99394.
246160_at	246160_at	At5g21040	898.5	P	726.7	P	746.5	P	putative protein predicted protein, Oryza sativa; supported by cDNA: gi_15081722_gb_AY048254.1_
246161_at	246161_at	At5g20900	775.3	P	783.4	P	709	P	putative protein predicted proteins, Arabidopsis thaliana; supported by cDNA: gi_15293158_gb_AY051013.1_
246162_at	246162_at	At4g36400	7.1	A	26.9	A	47.1	A	actin interacting protein ; supported by cDNA: gi_16604325_gb_AY058061.1_
246163_at	246163_at	At5g32600	53.3	A	37.2	A	60.1	A	putative protein predicted proteins, Arabidopsis thaliana
246164_at	246164_at	At5g32610	8.2	A	40.6	A	3.2	A	putative protein predicted proteins, Arabidopsis thaliana and Borrelia burgdorferi
246165_at	246165_at	At5g32400	22.5	A	21	A	5	A	putative protein
246166_at	246166_at	At5g32410	83.8	A	11.8	A	8.7	A	putative protein
246167_at	246167_at	At5g32430	15.5	A	175.7	A	49	A	putative protein
246168_at	246168_at	At5g32460	137.9	A	52.2	A	72.8	A	meristem protein - like reproductive meristem protein 1, broccoli, PIR:T14433
246169_at	246169_at	At5g32470	105	A	151.7	A	34.9	A	putative protein predicted protein, Haemophilus influenzae
246170_at	246170_at	At5g32450	139.8	P	72	A	61.8	A	putative protein various predicted proteins, Arabidopsis thaliana and others;supported by full-length cDNA: Ceres:5850.
246171_at	246171_at	At5g32440	7394.4	P	5414.3	P	5611.2	P	putative protein centrosomal Nek2-associated protein 1, Homo sapiens, EMBL:AF049105; supported by cDNA: gi_13877754_gb_AF370140.1_AF370140
246172_s_at	246172_s_at	At5g28360	64	P	63.8	A	66.2	A	fragment of 1-aminocyclopropane-1-carboxylate synthase 1-aminocyclopropane-1-carboxylate synthase - Arabidopsis thaliana, EMBL:U26542
246173_s_at	246173_s_at	At5g28370	111.4	A	52.6	A	52.9	A	putative protein hypothetical protein F2A19.120 - Arabidopsis thaliana, PIR:T47944
246174_s_at	246174_s_at	At5g28380	1465.8	P	4351.6	P	4384.7	P	putative protein hypothetical protein T27I15_50 - Arabidopsis thaliana, PIR:T50517
246175_s_at	246175_s_at	At5g28400	93.2	P	161.5	P	185.9	P	putative protein hypothetical protein F15G16.170 - Arabidopsis thaliana, PIR:T47970
246176_at	246176_at	At5g28410	8.7	A	21	A	12.3	A	putative protein DYNAMIN-LIKE PROTEIN- Arabidopsis thaliana, EMBL:L36939
246177_at	246177_at	At5g28420	5.2	A	14.3	A	10.7	A	putative protein predicted proteins - Arabidopsis thaliana
246178_s_at	246178_s_at	At5g28430	76.3	P	169.6	P	149.3	P	putative protein predicted proteins - Arabidopsis thaliana
246179_at	246179_at	At5g28440	5.5	A	16.2	A	4.5	A	putative protein hypothetical protein F2A19.80 - Arabidopsis thaliana, PIR:T47940
246180_at	246180_at	At5g20840	786.4	P	725.8	P	653.2	P	putative protein predicted proteins, Arabidopsis thaliana and others
246181_at	246181_at	At5g20860	8.1	A	25.7	A	20.7	A	pectinesterase - like protein probable pectinesterase precursor, garden pea, PIR:T06374
246182_at	246182_at	At5g20870	8.4	A	13.8	A	24.5	A	beta-1,3-glucanase - like protein probable beta-1,3-glucanase, wheat, PIR:T06268
246183_at	246183_at	At5g20940	19.3	A	109	A	29.7	A	beta-glucosidase - like protein beta-glucosidase, common nasturtium, PIR:T10521
246184_at	246184_at	At5g20950	15.9	A	117.3	M	15.4	A	beta-D-glucan exohydrolase - like protein beta-D-glucan exohydrolase, Nicotiana tabacum, EMBL:AB017502
246185_at	246185_at	At5g20980	381.9	P	251.9	P	254.4	P	5-methyltetrahydropteroyltriglutamate-homocysteine S-methyltransferase - like protein 5-methyltetrahydropteroyltriglutamate-homocysteine S-methyltransferase, Arabidopsis thaliana, EMBL:U97200
246186_at	246186_at	At5g21030	106.9	A	122.3	A	66.9	A	PINHEAD - like protein PINHEAD, Arabidopsis thaliana, EMBL:AF154272
246187_at	246187_at	At5g21020	148.2	A	243	A	265.4	A	putative protein
246188_at	246188_at	At5g21050	6857.9	P	4695.3	P	5019.4	P	putative protein
246189_at	246189_at	At5g20910	1395	P	1349.3	P	1178.6	P	ABI3-interacting protein 2 ;supported by full-length cDNA: Ceres:30983.
246190_at	246190_at	At5g21010	151	P	146.7	A	90.8	A	hypothetical protein (fragment) ;supported by full-length cDNA: Ceres:113260.
246191_at	246191_at	At5g20890	419.3	P	541.5	P	553	P	T-complex protein 1, beta subunit T-COMPLEX PROTEIN 1, BETA SUBUNIT, Homo sapiens, EMBL:AF026293;supported by full-length cDNA: Ceres:12972.
246192_at	246192_at	At5g20920	1407.3	P	1346.6	P	1664.4	P	translation initiation factor eIF-2 beta chain - like protein translation initiation factor eIF-2 beta chain, apple tree, PIR:T17104;supported by full-length cDNA: Ceres:3855.
246193_at	246193_at	At5g20880	9.9	A	54.8	A	5	A	Expressed protein ; supported by full-length cDNA: Ceres: 37542.
246194_at	246194_at	At4g37000	46.5	A	47.5	A	98.9	A	putative protein ;supported by full-length cDNA: Ceres:18266.
246195_at	246195_at	At4g36410	58.5	A	17.3	A	32.6	A	E2, ubiquitin-conjugating enzyme 17 (UBC17) identical to gi:2801446; supported by full-length cDNA: Ceres:40968.
246196_at	246196_at	At4g37090	224.1	P	250.8	P	228.6	P	hypothetical protein ;supported by full-length cDNA: Ceres:108940.
246197_at	246197_at	At4g37010	7.4	A	41.5	A	9	A	caltractin-like protein ;supported by full-length cDNA: Ceres:26540.
246198_at	246198_at	At4g36810	83.9	A	81.8	A	99.3	A	geranylgeranyl pyrophosphate synthase ;supported by full-length cDNA: Ceres:36701.
246199_at	246199_at	At4g36530	16.5	A	13.6	A	47.8	A	putative protein ;supported by full-length cDNA: Ceres:36845.
246200_at	246200_at	At4g37240	118.5	M	33.4	A	72.7	A	putative protein ;supported by full-length cDNA: Ceres:16131.
246201_at	246201_at	At4g36750	75.3	A	116.9	M	60.3	A	minor allergen ;supported by full-length cDNA: Ceres:35084.
246202_at	246202_at	At4g37040	149.1	P	191.1	P	88.3	P	methionyl aminopeptidase-like protein ;supported by full-length cDNA: Ceres:18909.
246203_at	246203_at	At4g36610	226.6	P	276.1	P	263.4	P	putative protein ; supported by full-length cDNA: Ceres: 38141.
246204_at	246204_at	At4g37020	435.9	P	236.4	A	158.9	A	putative protein ; supported by cDNA: gi_13358194_gb_AF325002.2_AF325002
246205_at	246205_at	At4g36970	11.9	A	9.4	A	4.1	A	hypothetical protein ; supported by cDNA: gi_15028060_gb_AY045887.1_
246206_at	246206_at	At4g36655	15.5	A	4.3	A	90.6	A	Expressed protein ; supported by cDNA: gi_15028196_gb_AY045921.1_
246207_at	246207_at	At4g36960	1061.9	P	912.7	P	1045.6	P	RNA-binding like protein non-consensus TA donor splice site at exon 6; supported by cDNA: gi_15081786_gb_AY048286.1_
246208_at	246208_at	At4g36490	56253.2	P	61340.2	P	57195.8	P	hypothetical protein ; supported by cDNA: gi_15215779_gb_AY050419.1_
246209_at	246209_at	At4g36870	3.3	A	12.8	A	52.2	A	BEL1-like homeobox 2 protein (BLH2) ; supported by cDNA: gi_15215856_gb_AY050459.1_
246210_at	246210_at	At4g36420	16.7	A	30	A	45.6	A	ribosomal protein ; supported by cDNA: gi_15450414_gb_AY052308.1_
246211_at	246211_at	At4g36730	37.7	A	147.4	P	76.8	A	G-box-binding factor 1 ; supported by cDNA: gi_15450987_gb_AY054574.1_
246212_at	246212_at	At4g36930	45.9	A	79	A	42.2	A	putative protein ; supported by cDNA: gi_11245493_gb_AF319540.1_AF319540
246213_at	246213_at	At4g36480	425.8	A	306.5	A	258.8	A	serine C-palmitoyltransferase like protein ; supported by cDNA: gi_14488274_dbj_AB063254.1_AB063254
246214_at	246214_at	At4g36990	47.5	A	104.2	P	4.4	A	heat shock transcription factor HSF4 ; supported by cDNA: gi_1619920_gb_U68017.1_ATU68017
246215_at	246215_at	At4g37180	1224.5	P	806.9	P	912.7	P	putative cytoskeletal protein ; supported by cDNA: gi_1732508_gb_U62741.1_ATU62741
246216_at	246216_at	At4g36380	131.7	A	9.1	A	58.1	A	cytochrome P450 like protein ; supported by cDNA: gi_4176419_dbj_AB008097.1_AB008097
246217_at	246217_at	At4g36920	41.3	A	5.3	A	60	A	APETALA2 protein ; supported by cDNA: gi_533708_gb_U12546.1_ATU12546
246218_at	246218_at	At4g36800	885.4	P	1378.5	P	1420.2	P	RUB1-conjugating enzyme RCE1, putative similar to gi:6635457; supported by cDNA: gi_6635456_gb_AF202771.1_AF202771
246219_at	246219_at	At4g36760	194.3	P	182.7	P	176.7	P	aminopeptidase-like protein ; supported by cDNA: gi_13430673_gb_AF360249.1_AF360249
246220_at	246220_at	At4g37210	930.2	P	603.8	P	716	P	putative protein ; supported by cDNA: gi_13877852_gb_AF370189.1_AF370189
246221_at	246221_at	At4g37120	2056.2	P	1308.9	P	1672.5	P	step II splicing factor - like protein ; supported by cDNA: gi_15912280_gb_AY056418.1_
246222_at	246222_at	At4g36900	9.6	A	105.3	A	102.1	A	TINY-like protein ; supported by cDNA: gi_16323158_gb_AY057683.1_
246223_at	246223_at	At4g36890	12.3	A	94.9	A	26.3	A	UDP-glucuronyltransferase-like protein
246224_at	246224_at	At4g36590	57.6	P	150.4	P	79.2	M	putative MADS-box protein ;supported by full-length cDNA: Ceres:21999.
246225_at	246225_at	At4g36910	91.1	A	72.7	A	61.9	A	putative protein ;supported by full-length cDNA: Ceres:13475.
246226_at	246226_at	At4g37200	358	P	244.1	P	376	P	thiol-disulfide interchange like protein
246227_at	246227_at	At4g36510	19.9	A	30.3	A	85.8	A	hypothetical protein
246228_at	246228_at	At4g36430	114.7	A	66.1	A	92.6	A	peroxidase like protein
246229_at	246229_at	At4g37160	53.8	A	31.3	A	80.1	A	pectinesterase like protein
246230_at	246230_at	At4g36710	5.7	A	7.6	A	10.9	A	SCARECROW-like protein
246231_at	246231_at	At4g37080	46.5	A	6.4	A	71	A	putative protein
246232_at	246232_at	At4g36630	1255.6	P	1334.8	P	1353.8	P	hypothetical protein
246233_at	246233_at	At4g36550	83.2	A	73.4	A	131.6	A	putative protein
246234_at	246234_at	At4g37280	30374.4	P	37463.2	P	36257.6	P	putative protein
246235_at	246235_at	At4g36830	195.4	P	171.4	P	123.1	P	putative protein
246236_at	246236_at	At4g36470	45.6	A	87.9	A	159.3	A	hypothetical protein
246237_at	246237_at	At4g36390	12.3	A	54.8	A	140.1	A	putative protein
246238_at	246238_at	At4g36670	71.1	A	47.9	A	146	P	sugar transporter like protein
246239_at	246239_at	At4g36790	118.5	A	107.5	A	122.8	A	putative protein
246240_at	246240_at	At4g37130	188.8	P	248.6	P	175.3	P	nucleoporin-like protein
246241_at	246241_at	At4g37050	22.3	A	12.3	A	10.1	A	patatin-like protein
246242_at	246242_at	At4g36600	1914.3	P	1173.3	P	1383.5	P	putative protein
246243_at	246243_at	At4g36520	47.4	A	46.7	A	68.4	A	trichohyalin like protein
246244_at	246244_at	At4g37250	14	A	15.8	A	8.6	A	receptor kinase-like protein
246245_at	246245_at	At4g36440	977.4	P	679.4	P	807.9	P	putative protein
246246_at	246246_at	At4g37170	6	A	25.3	A	15.2	A	putative protein
246247_at	246247_at	At4g36640	345.3	P	197.4	P	147.7	P	putative protein
246248_at	246248_at	At4g36560	3.1	A	2	A	27.8	A	hypothetical protein
246249_at	246249_at	At4g36680	8.2	A	55.7	A	18.5	A	salt-inducible like protein
246250_at	246250_at	At4g36880	10.9	A	11.1	A	40	A	cysteine proteinase similar to cysteine proteinase COT44 precursor SP:P25251 from [Brassica napus] (Rape)
246251_at	246251_at	At4g37220	52.5	A	17.5	A	14.8	A	cold acclimation protein homolog
246252_s_at	246252_s_at	At4g37070	33.4	A	9.3	A	53.1	P	patatin-like protein ;supported by full-length cDNA: Ceres:30438.
246253_at	246253_at	At4g37260	280.8	P	226.5	P	180.6	P	myb-related protein
246254_at	246254_at	At4g36450	24.8	A	41.4	A	17.3	A	MAP kinase like protein
246255_at	246255_at	At4g36650	165.7	M	593.2	P	471.7	P	transcription initiation factor like protein
246256_at	246256_at	At4g36770	45.4	A	61.7	A	21.5	A	glucosyltransferase-like protein
246257_at	246257_at	At4g36690	3776	P	4186.1	P	3445.5	P	splicing factor-like protein
246258_at	246258_at	At1g31840	279.3	P	220.7	P	197.3	P	PPR-repeat protein, putative contains multiple PPR domains: Pfam profile: PF01535: PPR repeat
246259_at	246259_at	At1g31830	1172.2	P	1450	P	1475.4	P	amino acid permease, putative contains Pfam profile: PF00324: Amino acid permease
246260_at	246260_at	At1g31820	111.1	P	159	A	118.2	A	amino acid permease, putative contains Pfam profile: PF00324: Amino acid permease
246261_at	246261_at	At1g31810	137.8	P	246	P	230.2	P	unknown protein
246262_at	246262_at	At1g31790	90.5	P	284.9	P	342.9	P	hypothetical protein
246263_at	246263_at	At1g31780	924.3	P	1137.9	P	1069.3	P	unknown protein
246264_at	246264_at	At1g31814	406.1	P	352.6	P	443.7	P	hypothetical protein
246265_at	246265_at	At1g31860	63.5	A	32.5	A	8.3	A	phosphoribosyl-ATP pyrophosphohydrolase (At-IE) identical to phosphoribosyl-ATP pyrophosphohydrolase (At-IE) [Arabidopsis thaliana] GI:3461884 (Plant Physiol. 118 (1), 275-283 (1998)); supported by full-length cDNA: Ceres: 25538.
246266_at	246266_at	At1g31817	419	P	538.2	P	551.9	P	30S ribosomal protein S11, putative contains Pfam profile: PF00411: Ribosomal protein S11; supported by full-length cDNA: Ceres: 36981.
246267_at	246267_at	At1g31812	3125.2	P	2527.3	P	2518.1	P	Acyl CoA binding protein, putative contains Pfam profile: PF00887: Acyl CoA binding protein;supported by full-length cDNA: Ceres:5663.
246268_at	246268_at	At1g31800	9.5	A	59.6	A	16.9	A	cytochrome P450, putative contains Pfam profile: PF00067: Cytochrome P450; supported by cDNA: gi_15912336_gb_AY056446.1_
246269_at	246269_at	At4g37110	285.9	P	318.4	P	226.1	P	putative protein
246270_at	246270_at	At4g36500	6.4	A	125.2	A	158.9	M	putative protein
246271_at	246271_at	At4g37230	7.6	A	4	A	5	A	photosystem II oxygen-evolving complex like protein
246272_at	246272_at	At4g37150	131.7	A	122.9	A	190.1	A	hydroxynitrile lyase like protein
246273_at	246273_at	At4g36700	6.2	A	6	A	50.6	A	globulin-like protein
246274_at	246274_at	At4g36620	7.3	A	45.2	A	16.6	A	transcription factor like protein
246275_at	246275_at	At4g36540	3.7	A	3.6	A	66.7	A	putative protein ; supported by full-length cDNA: Ceres: 123997.
246276_at	246276_at	At4g37270	246.2	P	268.2	P	230.6	P	Cu2+-transporting ATPase-like protein
246277_at	246277_at	At4g36460	19.7	A	66.2	A	37.5	A	hypothetical protein
246278_at	246278_at	At4g37190	93.1	A	29.9	A	97.6	A	tubulin-like protein
246279_at	246279_at	At4g36740	6.6	A	12.5	A	5.2	A	homeodomain protein
246280_at	246280_at	At4g36660	6.7	A	93.3	A	4.1	A	hypothetical protein
246281_at	246281_at	At4g36940	82.1	M	101	A	136	A	hypothetical protein
246282_at	246282_at	At4g36580	12.5	A	22.8	A	38.8	A	ATPase-like protein
246283_at	246283_at	At4g36860	36.9	A	94	A	41.2	A	putative protein
246284_at	246284_at	At4g36780	46.1	A	69.8	A	74.3	A	putative protein
246285_at	246285_at	At4g36980	45.4	A	207.5	A	189.8	A	putative protein
246286_at	246286_at	At1g31910	3280.7	P	4176.1	P	4241.4	P	unknown protein
246287_at	246287_at	At1g31870	629	P	552.6	P	591.3	P	unknown protein
246288_at	246288_at	At1g31850	5.4	A	11.5	A	5.9	A	unknown protein
246289_at	246289_at	At3g56880	128	P	157.6	P	183.8	P	putative protein predicted protein At2g41010 - Arabidopsis thaliana, EMBL:AC004261;supported by full-length cDNA: Ceres:39584.
246290_at	246290_at	At3g56800	25163.2	P	24338.7	P	23801.8	P	calmodulin-3 ;supported by full-length cDNA: Ceres:16715.
246291_at	246291_at	At3g56820	938.8	P	675.4	P	865.2	P	hypothetical protein ; supported by full-length cDNA: Ceres: 8960.
246292_at	246292_at	At3g56860	1563	P	1487.5	P	1591.7	P	putative protein hnRNP A/B related protein - Felis catus, EMBL:AF153444; supported by cDNA: gi_14194148_gb_AF367280.1_AF367280
246293_at	246293_at	At3g56710	46.4	A	70.1	A	25.1	A	SigA binding protein ; supported by cDNA: gi_14596086_gb_AY042831.1_
246294_at	246294_at	At3g56910	132.5	P	19.2	A	90.5	A	ribosomal protein, chloroplast ribosomal protein PsCL18 precursor, chloroplast - Pisum sativum, PIR:R5PM18; supported by cDNA: gi_14596188_gb_AY042882.1_
246295_at	246295_at	At3g56690	52.8	A	22	A	57.4	A	calmodulin-binding protein ; supported by cDNA: gi_6760427_gb_AF217546.1_AF217546
246296_at	246296_at	At3g56750	16.5	A	7.4	A	12	A	putative protein hypothetical protein At2g41150 - Arabidopsis thaliana, EMBL:AC004261; supported by cDNA: gi_16648896_gb_AY059818.1_
246297_at	246297_at	At3g51760	5.2	A	54.6	A	28.9	A	putative protein hypothetical protein F17M19.12 - Arabidopsis thaliana, EMBL:AC021665
246298_at	246298_at	At3g51770	2937	P	3556.6	P	3759.8	P	putative protein sequence in GenBank Accession Number AC002330
246299_at	246299_at	At3g51810	8.5	A	17.7	A	5.8	A	embryonic abundant protein AtEm1
246300_at	246300_at	At3g51830	14.9	A	119.5	A	225.6	A	putative transmembrane protein G5p yeast Sac1 protein, PIR:A33622
246301_at	246301_at	At3g51850	66.9	A	10.2	A	94.2	A	calcium-dependent protein kinase
246302_at	246302_at	At3g51860	110.7	A	129.3	A	84.7	A	Ca2+/H+-exchanging protein-like Arabidopsis thaliana high affinity calcium antiporter CAX1 encoded by GenBank Accession Number U57411
246303_at	246303_at	At3g51870	466.3	P	319.7	P	222.6	P	putative carrier protein peroxisomal Ca-dependent solute carrier - Oryctolagus cuniculus, EMBL:AF004161
246304_at	246304_at	At3g51840	595.7	P	694	P	679.3	P	acyl-coA dehydrogenase Mus musculus glutaryl-CoA dehydrogenase precursor encoded by GenBank Accession Number U18992;supported by full-length cDNA: Ceres:3844.
246305_at	246305_at	At3g51890	49	A	96.1	A	56.2	A	putative protein protein At2g40060 - Arabidopsis thaliana, EMBL:AF002109;supported by full-length cDNA: Ceres:93427.
246306_at	246306_at	At3g51780	1290	P	922.3	P	967.6	P	putative protein hypothetical proteins - Oryza sativa, Arabidopsis thaliana;supported by full-length cDNA: Ceres:21630.
246307_at	246307_at	At3g51800	150.2	M	131.5	A	184.1	M	putative nuclear DNA-binding protein G2p Mus musculus p38-2G4 protein: SwissProt Accession Number P50580; supported by cDNA: gi_14532885_gb_AY040067.1_
246308_at	246308_at	At3g51820	3049.7	P	2035.9	P	2291.9	P	chlorophyll synthetase ; supported by cDNA: gi_14596066_gb_AY042821.1_
246309_at	246309_at	At3g51790	221.4	P	263.4	P	239.9	P	putative transmembrane protein G1p Bradyrhizobium japonicum CycJ: PIR Accession Number S54745; supported by cDNA: gi_1657614_gb_U72502.1_ATU72502
246310_at	246310_at	At3g51895	830.8	P	753.4	P	881.5	P	sulfate transporter ATST1 ; supported by cDNA: gi_2285884_dbj_D89631.1_D89631
246311_at	246311_at	At3g51880	1728.3	P	2000.4	P	1832.5	P	high mobility group protein 2-like ; supported by cDNA: gi_15912190_gb_AY056373.1_
246312_at	246312_at	At1g31930	404.7	P	345.6	A	323.2	A	G-protein, putative contains Pfam profile: PF00503: G-protein alpha subunit
246313_at	246313_at	At1g31920	6	A	91	A	10.6	A	PPR-repeat protein, putative contains multiple PPR domains: PF01535: PPR repeat
246314_at	246314_at	At3g56850	300	P	381.1	P	502.5	P	promoter-binding factor-like protein Dc3 promoter-binding factor-3 - Helianthus annuus, EMBL:AF061870; supported by cDNA: gi_13346154_gb_AF334208.1_AF334208
246315_at	246315_at	At3g56870	157.3	P	365.2	P	350.8	P	hypothetical protein
246316_at	246316_at	At3g56890	12.6	A	6.9	A	55.2	A	putative protein predicted proteins - Arabidopsis thaliana
246317_at	246317_at	At3g56900	107.1	P	79	A	108.3	A	putative protein unnamed ORF - Homo sapiens, EMBL:AK000833
246318_at	246318_at	At3g56740	419.3	P	376	P	474.6	P	putative protein predicted protein BAA88548.1- Oryza sativa, EMBL:AP000969;supported by full-length cDNA: Ceres:18436.
246319_at	246319_at	At3g56680	1841.4	P	2434.5	P	1923.8	P	putative protein HYPOTHETICAL PROTEIN KIAA0029 - Homo sapiens, EMBL:D21852;supported by full-length cDNA: Ceres:27753.
246320_at	246320_at	At1g16560	81.8	A	12.1	A	98.4	A	unknown protein
246321_at	246321_at	At1g16640	49	A	102	P	72.3	A	unknown protein
246322_at	246322_at	At1g16680	29.7	A	100.1	A	19.6	A	S-locus protein, putative similar to S-locus protein 5 GI:6069485 from [Brassica rapa]
246323_at	246323_at	At1g16690	481.4	P	197.3	A	213.6	A	hypothetical protein predicted by genemark.hmm
246324_at	246324_at	At1g16610	328.9	P	666.4	P	411.3	P	arginine/serine-rich protein, putative similar to arginine/serine-rich protein GI:6601502 from [Arabidopsis thaliana]; supported by cDNA: gi_15027956_gb_AY045835.1_
246325_at	246325_at	At1g16540	48.2	A	144.1	A	89.6	A	hypothetical protein contains similarity to molybdopterin cofactor sulfurase GI:8978317 from [Bos taurus]; supported by cDNA: gi_13123672_gb_AF325457.1_AF325457
246326_at	246326_at	At1g16590	94.1	A	52.2	A	62.4	A	unknown protein ; supported by cDNA: gi_14583009_gb_AF372829.1_AF372829
246327_at	246327_at	At1g16670	46.4	A	68.4	A	24.1	A	receptor-like serine/threonine kinase, putative similar to receptor-like serine/threonine kinase GI:2465923 from [Arabidopsis thaliana]; supported by cDNA: gi_16649102_gb_AY059921.1_
246328_at	246328_at	At3g43590	372.3	P	410.5	P	478.1	P	putative protein hexamer-binding protein HEXBP - Leishmania major, PIR:A47156
246329_at	246329_at	At3g43610	128.6	A	90.6	A	161.8	P	putative protein gamma-tubulin interacting protein - Xenopus laevis, EMBL:AF052663
246330_at	246330_at	At3g43600	24.7	A	122.9	A	5.6	A	aldehyde oxidase ; supported by cDNA: gi_3172024_dbj_AB005805.1_AB005805
246331_at	246331_at	At3g44820	34.2	A	120.7	A	19.4	A	non-phototropic hypocotyl 3-like protein non-phototropic hypocotyl 3 - Arabidopsis thaliana, EMBL:AF180390
246332_at	246332_at	At3g44830	11.4	A	6.7	A	38.7	A	putative protein phosphatidylcholine--sterol O-acyltransferase (EC 2.3.1.43) precursor, mouse, PIR:XXMSN
246333_at	246333_at	At3g44840	10.2	A	68.2	A	12.1	A	proteinkinase AtPP -like protein AtPP protein, Brassica napus, EMBL:BNA245479
246334_at	246334_at	At3g44850	271.2	P	305	P	381.9	P	putative protein serine kinase SRPK2, Homo sapiens, EMBL:AC005070
246335_at	246335_at	At3g44880	18.6	A	103	A	4.8	A	lethal leaf-spot 1 homolog Lls1
246336_at	246336_at	At3g44900	2089.9	P	2696.2	P	2212.3	P	putative protein putative integral membrane ion antiporter, Amycolatopsis orientalis, EMBL:AL078635
246337_at	246337_at	At3g44910	6169.5	P	6713.6	P	6135.2	P	putative protein putative integral membrane ion antiporter, Amycolatopsis orientalis, EMBL:AL078635
246338_s_at	246338_s_at	At3g44930	7419.4	P	7763.2	P	8006	P	putative protein putative integral membrane ion antiporter, Amycolatopsis orientalis, EMBL:AL078635
246339_at	246339_at	At3g44890	9.9	A	84.8	A	52.4	A	RP19 gene for chloroplast ribosomal protein CL9 ;supported by full-length cDNA: Ceres:13554.
246340_s_at	246340_s_at	At3g44860	58.4	A	5.4	A	2.3	A	AtPP -like protein AtPP protein, Brassica napus, EMBL:BNA245479; supported by cDNA: gi_15293070_gb_AY050969.1_
246341_x_at	246341_x_at	At3g43150	4.7	A	8.3	A	6.5	A	putative protein predicted proteins, Arabidopsis thaliana
246342_at	246342_at	At3g56700	31.9	A	14.3	A	86	A	putative protein male sterility protein 2 - Arabidopsis thaliana, EMBL:X73652
246343_at	246343_at	At3g56720	583.9	P	519.4	P	512.1	P	putative protein
246344_at	246344_at	At3g56730	875.1	P	762.1	P	755.5	P	putative protein predicted proteins - Arabidopsis thaliana
246345_at	246345_at	At3g56760	982.7	P	733.1	P	842.8	P	calcium-dependent protein kinase-like CDPK-related protein kinase - Arabidopsis thaliana, EMBL:Y09418
246346_at	246346_at	At3g56810	3.6	A	60.6	A	11.4	A	hypothetical protein
246347_at	246347_at	At3g56830	75.1	A	82.3	A	161.5	A	putative protein probable chloroplast allophycocyanin linker protein - different species
246348_at	246348_at	At3g56840	92.9	P	148.2	P	147.5	P	putative protein putative glycerol-3-phosphate dehydrogenases - bacteria
246349_at	246349_at	At1g51915	4.8	A	9.4	A	2.8	A	Expressed protein ; supported by full-length cDNA: Ceres: 4795.
246350_at	246350_at	At1g16650	7	A	7.2	A	17.7	A	hypothetical protein predicted by genemark.hmm
246351_at	246351_at	At1g16570	209.8	P	170.3	A	201.6	A	unknown protein contains similarity to beta-1,4 mannosyltransferase GI:6970470 from [Homo sapiens]
246352_at	246352_at	At1g39270	50.6	A	8.8	A	5.4	A	hypothetical protein
246353_s_at	246353_s_at	At1g39190	7.1	A	32	A	6.5	A	hypothetical protein
246354_at	246354_at	At1g38950	48.6	A	26.4	A	54.3	A	hypothetical protein
246355_at	246355_at	At1g38470	78	M	20.1	A	80.9	A	hypothetical protein
246356_x_at	246356_x_at	At1g40150	54.4	A	73	A	88.4	A	hypothetical protein, 5 partial
246357_x_at	246357_x_at	At1g40550	59.1	A	82.9	A	20.5	A	hypothetical protein
246358_x_at	246358_x_at	At1g40710	7.5	A	111.3	A	101.5	A	hypothetical protein
246359_x_at	246359_x_at	At1g40871	67.2	A	141.5	P	16	A	hypothetical protein
246360_at	246360_at	At1g40952	153	A	103.2	A	8.4	A	hypothetical protein
246361_s_at	246361_s_at	At1g41114	54.2	A	8.7	A	45.9	A	hypothetical protein
246362_at	246362_at	At1g41276	17.8	A	22.7	A	22.2	A	hypothetical protein
246363_at	246363_at	At1g40390	4	A	10.6	A	10.2	A	hypothetical protein
246364_at	246364_at	At1g40230	7.7	A	15	A	30.6	A	hypothetical protein
246365_at	246365_at	At1g39750	19.3	A	12.8	A	3	A	hypothetical protein
246366_at	246366_at	At1g51850	25.7	A	11.3	A	7.7	A	light repressible receptor protein kinase, putative similar to light repressible receptor protein kinase GI:1321686 from [Arabidopsis thaliana]
246367_at	246367_at	At1g51880	18.7	A	20.1	A	5.8	A	light repressible receptor protein kinase, putative similar to light repressible receptor protein kinase GI:1321686 from [Arabidopsis thaliana]
246368_at	246368_at	At1g51890	24.6	A	75.2	A	43.1	A	light repressible receptor protein kinase, putative similar to light repressible receptor protein kinase GI:1321686 from [Arabidopsis thaliana]
246369_at	246369_at	At1g51910	50.9	A	66.6	A	44.6	A	light repressible receptor protein kinase, putative similar to light repressible receptor protein kinase GI:1321686 from [Arabidopsis thaliana]
246370_at	246370_at	At1g51920	66.6	A	19.7	A	61.7	A	hypothetical protein predicted by genemark.hmm
246371_at	246371_at	At1g51940	66.5	A	21.3	A	33.3	A	unknown protein contains similarity to protein kinases
246372_at	246372_at	At1g51900	24.5	A	7.8	A	84.6	A	hypothetical protein predicted by genemark.hmm
246373_at	246373_at	At1g51860	7	A	12.6	A	39	A	receptor-like protein kinase, putative similar to receptor-like protein kinase GI:9758831 from [Arabidopsis thaliana]
246374_at	246374_at	At1g51840	3.8	A	7.2	A	4.5	A	light repressible receptor protein kinase, putative similar to light repressible receptor protein kinase GI:1321686 from [Arabidopsis thaliana]
246375_at	246375_at	At1g51830	4.6	A	22.7	A	31.9	A	light repressible receptor protein kinase, putative similar to light repressible receptor protein kinase GI:1321686 from [Arabidopsis thaliana]
246376_at	246376_at	At1g51950	36.1	A	43.4	A	34.7	A	auxin regulated protein IAA18, putative similar to auxin regulated protein IAA18 GI:2618725 from [Arabidopsis thaliana];supported by full-length cDNA: Ceres:6493.
246377_at	246377_at	At1g57550	317.5	P	236.9	P	195.2	P	low-temperature-specific protein, putative similar to low-temperature-specific protein GI:439272 from (Hordeum vulgare)
246378_at	246378_at	At1g57620	123.1	A	51.8	A	32.4	A	integral membrane protein, putative similar to integral membrane protein GI:3288599 from [Rattus norvegicus]; supported by full-length cDNA: Ceres: 17602.
246379_s_at	246379_s_at	At1g57660	357.1	P	224.7	P	192.3	P	60S ribosomal protein L21, putative similar to 60S ribosomal protein L21 GB:Q43291 GI:2851508 from [Arabidopsis thaliana]; supported by full-length cDNA: Ceres: 28545.
246380_at	246380_at	At1g57750	20.3	A	21.3	A	5.5	A	cytochrome P450, putative similar to cytochrome P450 GI:4688670 from [Catharanthus roseus]; supported by cDNA: gi_16930512_gb_AF419610.1_AF419610
246381_at	246381_at	At1g39430	53.9	A	17.5	A	10.5	A	hypothetical protein
246382_at	246382_at	At1g39350	82.7	A	27.5	A	37.8	A	hypothetical protein
246383_at	246383_at	At1g77360	149.4	A	212	A	171.1	P	hypothetical protein predicted by genemark.hmm
246384_at	246384_at	At1g77370	190.5	A	111.9	A	173	A	glutaredoxin, putative similar to glutaredoxin GI:1732424 from [Ricinus communis]
246385_at	246385_at	At1g77390	2488.3	P	2070.2	P	2101.8	P	mitotic cyclin a2-type, putative similar to mitotic cyclin a2-type GI:857396 from [Glycine max]
246386_at	246386_at	At1g77410	3665	P	5992	P	6483.6	P	beta-galactosidase, putative similar to beta-galactosidase GI:452711 from [Asparagus officinalis]
246387_at	246387_at	At1g77400	16.9	A	48.2	A	42	A	hypothetical protein predicted by genscan+
246388_at	246388_at	At1g77405	15.5	A	112.1	A	5.8	A	hypothetical protein predicted by genscan+
246389_at	246389_at	At1g77380	8.2	A	5	A	12	A	amino acid carrier, putative similar to amino acid carrier GI:3293031 from [Ricinus communis];supported by full-length cDNA: Ceres:15825.
246390_at	246390_at	At1g77330	17.1	A	6.1	A	11.8	A	1-aminocyclopropane-1-carboxylate oxidase, putative similar to 1-aminocyclopropane-1-carboxylate oxidase GI:3386565 from [Sorghum bicolor];supported by full-length cDNA: Ceres:269582.
246391_at	246391_at	At1g77350	121.3	A	126.9	A	124.3	A	unknown protein ; supported by cDNA: gi_16648790_gb_AY058172.1_
246392_at	246392_at	At1g58120	28050.3	P	33936	P	32601.2	P	hypothetical protein predicted by genemark.hmm
246393_at	246393_at	At1g58150	6.9	A	17	A	15.4	A	phosphoglycerate kinase, putative similar to phosphoglycerate kinase GI:155584 from [Zymomonas mobilis]
246394_at	246394_at	At1g58160	5.5	A	92.5	P	51.3	A	myrosinase binding protein, putative similar to myrosinase binding protein GI:1711295 from [Brassica napus]
246395_at	246395_at	At1g58170	118.2	A	177.8	P	78	A	dirigent protein, putative similar to dirigent protein GI:6694699 from [Thuja plicata]
246396_at	246396_at	At1g58180	10	A	63.1	A	4.7	A	carbonic anhydrase, putative similar to carbonic anhydrase 1 GI:882241 from [Flaveria linearis]
246397_at	246397_at	At1g58190	11.3	A	6.1	A	3.1	A	hypothetical protein contains similarity to disease resistance protein GI:3894383 from [Lycopersicon esculentum]
246398_at	246398_at	At1g58100	78.6	A	32	A	103.7	A	auxin-induced basic helix-loop-helix transcription factor, putative similar to auxin-induced basic helix-loop-helix transcription factor GI:5731257 from (Gossypium hirsutum)
246399_at	246399_at	At1g58110	13.5	A	5.4	A	89	A	bZIP transcription factor similar to bZIP transcriptional activator RSG GI:8777512 from (Nicotiana tabacum)
246400_at	246400_at	At1g57540	50.7	A	34.7	A	12.6	A	hypothetical protein contains similarity to T-box domain GI:5931592 from [Cynops pyrrhogaster]
246401_at	246401_at	At1g57560	126	P	220.9	P	298.6	P	DNA-binding protein, putative similar to DNA-binding protein GI:19058 from [Hordeum vulgare]; supported by full-length cDNA: Ceres:250386.
246402_at	246402_at	At1g57570	46.1	A	66.9	A	53	A	jasmonate inducible protein, putative similar to jasmonate inducible protein GI:9279645 from [Arabidopsis thaliana]
246403_at	246403_at	At1g57590	74	A	30.5	A	132.3	A	pectinacetylesterase precursor, putative similar to pectinacetylesterase precursor GI:1431629 from [Vigna radiata]
246404_at	246404_at	At1g57600	66.2	A	12.8	A	9.8	A	hypothetical protein contains similarity to cytochrome oxidase subunit GI:440282 from [Ceratoglyphina styracicola]
246405_at	246405_at	At1g57630	8.4	A	45.3	A	4.9	A	disease resistance protein RPP1-WsB, putative similar to disease resistance protein RPP1-WsB GI:9279731 from [Arabidopsis thaliana]
246406_at	246406_at	At1g57650	7.6	A	11.1	A	62.8	A	disease resistance protein RPP1-WsA, putative similar to disease resistance protein RPP1-WsA GI:3860163 from [Arabidopsis thaliana]
246407_at	246407_at	At1g57670	47.2	A	34.5	A	35.1	A	disease resistance protein RPS4, putative similar to disease resistance protein RPS4 GI:9759605 from [Arabidopsis thaliana]
246408_at	246408_at	At1g57680	6736.2	P	7947.3	P	7583.7	P	hypothetical protein predicted by genemark.hmm
246409_at	246409_at	At1g57700	251.4	P	85.8	A	81.7	P	CRK1 protein, putative similar to CRK1 protein GI:7671528 from [Beta vulgaris]
246410_at	246410_at	At1g57760	170.2	A	164.9	M	236.5	A	hypothetical protein predicted by genemark.hmm
246411_at	246411_at	At1g57770	37.4	A	6.3	A	12.1	A	hypothetical protein contains similarity to phytoene dehydrogenase (PDH1) GI:433144 from [Cercospora nicotianae]
246412_at	246412_at	At5g17530	4.2	A	13.2	A	61.8	A	phosphoglucomutase-like protein phosphoglucomutase, chloroplast - Spinacia oleracea, EMBL:X75898; supported by cDNA: gi_16974561_gb_AY061751.1_
246413_at	246413_at	At1g77310	460.7	P	577.2	P	647.7	P	unknown protein
246414_at	246414_at	At1g77340	79.2	A	2.1	A	4.6	A	hypothetical protein similar to hypothetical protein GI:8978284 from [Arabidopsis thaliana]
246415_at	246415_at	At5g17160	103.9	A	97.1	A	4.5	A	putative protein (fragment) predicted protein, Arabidopsis thaliana
246416_at	246416_at	At5g16920	23.7	A	47.7	A	72.1	A	putative protein predicted proteins, Arabidopsis thaliana;supported by full-length cDNA: Ceres:158721.
246417_at	246417_at	At5g16990	191.1	P	200.7	P	119.9	A	quinone oxidoreductase - like protein probable quinone oxidoreductase (EC 1.6.5.5) P1, Arabidopsis thaliana, PIR:S57612;supported by full-length cDNA: Ceres:205489.
246418_at	246418_at	At5g16960	19.2	A	50.1	A	59.2	A	quinone oxidoreductase -like protein probable quinone oxidoreductase (EC 1.6.5.5) P1, Arabidopsis thaliana, PIR:S57611;supported by full-length cDNA: Ceres:7898.
246419_at	246419_at	At5g17030	6.5	A	18.3	A	12.8	A	UDP glucose:flavonoid 3-o-glucosyltransferase -like protein UDP glucose:flavonoid 3-o-glucosyltransferase, Vitis vinifera, EMBL:AF000372;supported by full-length cDNA: Ceres:4234.
246420_at	246420_at	At5g16870	6.4	A	5.8	A	4.3	A	putative protein various predicted proteins from various species;supported by full-length cDNA: Ceres:312.
246421_at	246421_at	At5g16880	3717.1	P	2523.4	P	2476.1	P	TOM (target of myb1) -like protein TOM1, Mus musculus, EMBL:MUS6972;supported by full-length cDNA: Ceres:1330.
246422_at	246422_at	At5g17060	1193.2	P	1193.4	P	1030.8	P	ADP-ribosylation factor -like protein ADP-ribosylation factor, Dugesia japonica, EMBL:DJAB1051;supported by full-length cDNA: Ceres:26844.
246423_at	246423_at	At5g16950	11.1	A	17.6	A	44.3	A	putative protein ribosomal protein L18, Vibrio proteolyticus, PIR:JC5753; supported by cDNA: gi_13926246_gb_AF372881.1_AF372881
246424_at	246424_at	At5g17020	321.1	P	312.3	P	432.8	P	Exportin1 (XPO1) protein ; supported by cDNA: gi_15810122_gb_AY056126.1_
246425_at	246425_at	At5g17420	107.9	A	29.1	A	78.7	A	cellulose synthase catalytic subunit (IRX3) ; supported by cDNA: gi_4886755_gb_AF088917.1_AF088917
246426_at	246426_at	At5g17430	52.3	A	186	A	223.8	A	ovule development protein aintegumenta-like protein ovule development protein aintegumenta - Arabidopsis thaliana, PIR:S71365
246427_at	246427_at	At5g17400	9480.3	P	7106	P	6694.2	P	ADP/ATP translocase-like protein adp/atp translocase - Schizosaccharomyces pombe, PIR:T40526;supported by full-length cDNA: Ceres:36031.
246428_at	246428_at	At5g17410	5.6	A	40.8	A	46.9	A	spindle pole body protein-like spindle pole body protein - Homo sapiens, EMBL:AF042379; supported by cDNA: gi_14532825_gb_AY040037.1_
246429_at	246429_at	At5g17450	7.3	A	61.5	A	9.5	A	farnesylated protein ATFP6-like protein farnesylated protein ATFP6 - Arabidopsis thaliana, EMBL:U64909
246430_at	246430_at	At5g17470	32.2	A	11.9	A	30.8	A	calmodulin-like protein calmodulin-related protein (TCH2) - Arabidopsis thaliana, EMBL:AF026473
246431_at	246431_at	At5g17480	1117.1	P	829.2	P	1410.7	P	calcium-binding protein calcium binding protein - Brassica rapa, EMBL:D63154
246432_at	246432_at	At5g17490	5.7	A	7.6	A	8.9	A	RGA-like protein putative member of the VHIID domain transcription factor family RGAL - Arabidopsis thaliana, EMBL:AJ224957
246433_at	246433_at	At5g17510	370.6	P	372.7	P	411.1	P	glutamine-rich protein predicted protein T21P5.12 - Arabidopsis thaliana, EMBL:AC009895
246434_at	246434_at	At5g17520	183.4	P	272.6	P	258.7	P	root cap 1 (RCP1) ;supported by full-length cDNA: Ceres:10216.
246435_at	246435_at	At5g17460	5.2	A	5.4	A	41.5	A	hypothetical protein ; supported by cDNA: gi_15292800_gb_AY050834.1_
246436_at	246436_at	At5g17440	102.2	P	130.8	P	209.1	P	putative protein cisplatin resistance-associated overexpressed protein - Homo sapiens, EMBL:AB034205; supported by cDNA: gi_15450598_gb_AY052667.1_
246437_at	246437_at	At5g17540	3.8	A	53.2	A	42.3	A	putative protein hypersensitivity-related gene product HSR201 - Nicotiana tabacum, EMBL:X95343
246438_at	246438_at	At5g17580	18.3	A	65.6	A	3.8	A	putative protein non-phototropic hypocotyl 3 (NPH3) - Arabidopsis thaliana, EMBL:AF180390
246439_at	246439_at	At5g17600	28.3	A	52	A	17.3	A	RING-H2 zinc finger protein-like RING-H2 zinc finger protein ATL4 - Arabidopsis thaliana, EMBL:AF132014
246440_at	246440_at	At5g17650	166.5	M	130.4	A	125.1	A	glycine/proline-rich protein glycine/proline-rich protein GPRP - Arabidopsis thaliana, EMBL:X84315
246441_at	246441_at	At5g17560	71.8	A	135.8	A	34	A	putative protein ;supported by full-length cDNA: Ceres:9667.
246442_at	246442_at	At5g17610	204.4	P	227.6	P	108.5	P	hypothetical protein ;supported by full-length cDNA: Ceres:96001.
246443_at	246443_at	At5g17620	137.9	P	56	A	106.9	P	hypothetical protein ;supported by full-length cDNA: Ceres:22757.
246444_at	246444_at	At5g17570	454.7	P	268.8	P	385.8	P	putative protein predicted protein T21P5.8 - Arabidopsis thaliana, EMBL:AC009895;supported by full-length cDNA: Ceres:6685.
246445_at	246445_at	At5g17630	112.7	A	146.9	M	12.5	A	glucose 6 phosphate/phosphate translocator-like protein glucose 6 phosphate/phosphate translocator - Arabidopsis thaliana, EMBL:AF233658; supported by cDNA: gi_13937217_gb_AF372964.1_AF372964
246446_at	246446_at	At5g17640	373.2	P	434.8	P	400.2	P	putative protein hypothetical protein T27I1.4 - Arabidopsis thaliana, EMBL:AC004122; supported by cDNA: gi_13877884_gb_AF370205.1_AF370205
246447_at	246447_at	At5g16780	1455.8	P	1543.2	P	1586.3	P	putative protein SART-1 protein - Homo sapiens, PIR:T00034
246448_at	246448_at	At5g16800	2022.9	P	2851.1	P	2766.5	P	putative protein putative N-acetlytransferase F13E7.7 - Arabidopsis thaliana, EMBL:AC018363
246449_at	246449_at	At5g16810	67.2	A	17.4	A	9.8	A	hypothetical protein
246450_at	246450_at	At5g16820	9.1	A	4.2	A	5.3	A	Heat Shock Factor 3
246451_at	246451_at	At5g16760	3689.6	P	3798.5	P	3833.4	P	Inositol 1,3,4-Trisphosphate 5/6 kinase ;supported by full-length cDNA: Ceres:30653.
246452_at	246452_at	At5g16840	2843.3	P	1894	P	1993.7	P	putative protein predicted proteins - Arabidopsis thaliana;supported by full-length cDNA: Ceres:34944.
246453_at	246453_at	At5g16830	2707	P	2145.3	P	2324.4	P	syntaxin homologue ;supported by full-length cDNA: Ceres:8257.
246454_at	246454_at	At5g16710	101.9	P	139.4	P	170.3	P	Expressed protein ; supported by full-length cDNA: Ceres: 16205.
246455_at	246455_at	At5g16790	6.4	A	4.5	A	7.5	A	putative protein predicted protein F13E7.10 - Arabidopsis thaliana, EMBL:AC018363;supported by full-length cDNA: Ceres:18788.
246456_at	246456_at	At5g16850	60.3	A	7.6	A	111.5	P	telomerase reverse transcriptase ; supported by cDNA: gi_5880682_gb_AF135454.1_AF135454
246457_at	246457_at	At5g16750	116.4	A	29.1	A	7.5	A	WD40-repeat protein transducin homolog sazD - Homo sapiens, EMBL:U02609; supported by cDNA: gi_15810484_gb_AY056281.1_
246458_at	246458_at	At5g16860	6.7	A	4.1	A	12.3	A	putative protein various predicted proteins, Arabidopsis thaliana
246459_at	246459_at	At5g16900	90	P	55	A	155.3	P	receptor protein kinase -like protein serine/threonine-specific receptor protein kinase (EC 2.7.1.-), Arabidopsis thaliana, PIR:S71277
246460_at	246460_at	At5g16910	53.1	A	90.1	P	81	A	cellulose synthase catalytic subunit -like protein Ath-B, cellulose synthase catalytic subunit, Arabidopsis thaliana, EMBL:AF027174
246461_at	246461_at	At5g16930	9.3	A	6.1	A	58.1	A	putative protein AAA family protein Bor, Drosophila melanogaster, EMBL:AF227209
246462_at	246462_at	At5g16940	14.8	A	3.8	A	11	A	putative protein predicted protein, Drosophila melanogaster
246463_at	246463_at	At5g16970	243.3	A	502.6	P	291.9	A	quinone oxidoreductase -like protein probable quinone oxidoreductase (EC 1.6.5.5) P1, Arabidopsis thaliana, PIR:S57611
246464_at	246464_at	At5g16980	97.8	A	139	A	61	A	quinone oxidoreductase -like protein probable quinone oxidoreductase (EC 1.6.5.5) P1, Arabidopsis thaliana, PIR:S57611
246465_at	246465_at	At5g17000	4	A	48.8	A	3.7	A	quinone oxidoreductase - like protein probable quinone oxidoreductase (EC 1.6.5.5) P1, Arabidopsis thaliana, PIR:S57611
246466_at	246466_at	At5g17010	97.9	P	76.1	A	102.5	A	sugar transporter - like protein D-XYLOSE-PROTON SYMPORTER (D-XYLOSE TRANSPORTER), Lactobacillus brevis, SWISSPROT:XYLT_LACBR
246467_at	246467_at	At5g17040	12	A	15.1	A	13.2	A	UDP glucose:flavonoid 3-o-glucosyltransferase -like protein UDP glucose:flavonoid 3-o-glucosyltransferase, Vitis vinifera, EMBL:AF000371
246468_at	246468_at	At5g17050	52.6	A	27.9	A	17.1	A	UDP glucose:flavonoid 3-o-glucosyltransferase -like protein UDP glucose:flavonoid 3-o-glucosyltransferase, Vitis vinifera, EMBL:AF000372
246469_at	246469_at	At5g17070	92.7	A	136.8	P	132.9	P	putative protein predicted protein, Drosophila melanogaster, EMBL:AE003450
246470_at	246470_at	At5g17080	51.8	A	55.7	A	42.3	A	putative protein predicted proteins, from Arabidopsis and Drosophila
246471_s_at	246471_s_at	At5g17100	375.4	P	254.8	P	246.4	P	putative protein predicted proteins, Arabidopsis thaliana
246472_at	246472_at	At5g17130	32	A	35.5	A	59.6	A	putative protein predicted protein, Arabidopsis thaliana
246473_at	246473_at	At5g17140	60.3	A	11.3	A	55.4	A	putative protein cathepsin L-like cysteine proteinase, Haemaphysalis longicornis, EMBL:AB020491
246474_at	246474_at	At5g17150	4	A	8.8	A	76.1	A	putative protein predicted protein, Arabidopsis thaliana
246475_at	246475_at	At5g16720	44.5	A	63.8	A	19.8	A	putative protein IFA-binding protein - Arabidopsis thaliana, EMBL:AF004556
246476_at	246476_at	At5g16730	3.7	A	24.6	A	45.5	A	putative protein predicted proteins - Arabidopsis thaliana and Oryza sativa
246477_at	246477_at	At5g16770	73.2	A	8.8	A	65.4	A	putative transcription factor (MYB9)
246478_at	246478_at	At5g15980	17.2	A	4.6	A	75.1	A	putative protein several hypothetical proteins - Arabidopsis thaliana
246479_at	246479_at	At5g16060	152.7	P	108.7	A	80.1	A	hypothetical protein
246480_at	246480_at	At5g16070	136	A	19.8	A	123.4	A	TCP-1 chaperonin-like protein t-complex-type molecular chaperone Cctz - Mus musculus, EMBL:Z31557
246481_s_at	246481_s_at	At5g15960	217.6	P	569.2	P	448.9	P	cold and ABA inducible protein kin1 ;supported by full-length cDNA: Ceres:2270.
246482_at	246482_at	At5g15930	2221.1	P	2202.2	P	2255.5	P	plant adhesion molecule 1 (PAM1) ;supported by full-length cDNA: Ceres:39585.
246483_at	246483_at	At5g16000	51.5	A	41.9	A	65.1	A	receptor protein kinase-like protein probable somatic embryogenesis receptor-like kinase - Daucus carota, EMBL:U93048;supported by full-length cDNA: Ceres:40594.
246484_at	246484_at	At5g16040	113.6	P	139	P	85.2	A	UVB-resistance protein-like UVB-resistance protein UVR8 - Arabidopsis thaliana, EMBL:AF130441;supported by full-length cDNA: Ceres:13316.
246485_at	246485_at	At5g16080	79.3	A	87.3	A	175.5	A	putative protein cell death associated protein - Nicotiana tabacum, EMBL:AF212184;supported by full-length cDNA: Ceres:37170.
246486_at	246486_at	At5g15910	412.7	P	902.8	P	887	P	putative protein ;supported by full-length cDNA: Ceres:22994.
246487_at	246487_at	At5g16030	18.9	A	86.6	A	19.7	A	putative protein with poly glutamic acid stretch hypothetical protein F16B3.13 - Arabidopsis thaliana, EMBL:AC021640; supported by full-length cDNA: Ceres: 29745.
246488_at	246488_at	At5g16010	2111.6	P	739.8	P	703.7	P	steroid 5alpha-reductase-like protein steroid 5alpha-reductase - Rattus norvegicus, PIR:A34239; supported by cDNA: gi_14190512_gb_AF380656.1_AF380656
246489_at	246489_at	At5g16050	5193	P	4782.1	P	3961.1	P	14-3-3 protein GF14upsilon (grf5) identical to 14-3-3 protein GF14 upsilon GI:2232148 from [Arabidopsis thaliana] ; supported by cDNA: gi_14334531_gb_AY035170.1_
246490_at	246490_at	At5g15950	4441.9	P	4300.8	P	4205.4	P	S-adenosylmethionine decarboxylase (adoMetDC2) ; supported by cDNA: gi_16930682_gb_AF436825.1_AF436825
246491_at	246491_at	At5g16100	24742.6	P	31149.1	P	29611.4	P	hypothetical protein
246492_at	246492_at	At5g16140	3.4	A	60.7	A	37.2	A	CRS2-like protein CRS2 - Zea mays, EMBL:AF225708
246493_at	246493_at	At5g16180	4	A	36	A	3.4	A	putative protein hypothetical proteins - Arabidopsis thaliana
246494_at	246494_at	At5g16190	4.5	A	32.8	A	15.1	A	putative protein putative cellulose synthase celA - Rhizobium leguminosarum, EMBL:AF121340
246495_at	246495_at	At5g16200	256.4	P	218.4	P	121.2	P	putative protein hypothetical protein T2E12.2 - Arabidopsis thaliana, EMBL:AC015986
246496_at	246496_at	At5g16210	550.2	P	434.1	P	726.2	P	putative protein KIAA1468 - Homo sapiens, EMBL:AB040901
246497_at	246497_at	At5g16220	664.8	P	1124.6	P	936	P	putative protein hypothetical proteins - Arabidopsis thaliana
246498_at	246498_at	At5g16230	406.7	P	603.7	P	485	P	stearoyl-acyl carrier protein desaturase stearoyl-acyl carrier protein desaturase sad1 - Linum usitatissimum, EMBL:AJ006957
246499_at	246499_at	At5g16260	500.2	P	473.6	P	554.2	P	putative protein Tat-SF1 - Homo sapiens, EMBL:U76992
246500_at	246500_at	At5g16270	228.7	P	421.3	P	341.4	P	putative protein HR21spA protein involved in DNA double-strand break repair - Mus musculus, EMBL:X98293
246501_at	246501_at	At5g16280	360.6	A	444	A	537.1	P	putative protein KIAA1012 protein - Homo sapiens, EMBL:AB023229
246502_at	246502_at	At5g16240	5108.8	P	5380.7	P	5521	P	stearoyl-acyl carrier protein desaturase stearoyl-acyl carrier protein desaturase sad1 - Linum usitatissimum, EMBL:AJ006957;supported by full-length cDNA: Ceres:41275.
246503_at	246503_at	At5g16130	184.1	P	217.4	P	177	A	40S ribosomal protein S7-like 40S ribosomal protein S7 homolog - Brassica oleracea, EMBL:AF144752;supported by full-length cDNA: Ceres:23518.
246504_at	246504_at	At5g16160	79.3	P	39.4	A	44	A	hypothetical protein ;supported by full-length cDNA: Ceres:8964.
246505_at	246505_at	At5g16250	65.5	A	75.9	A	153.9	P	putative protein hypothetical protein F16B3.27 - Arabidopsis thaliana, EMBL:AC021640;supported by full-length cDNA: Ceres:18222.
246506_at	246506_at	At5g16110	9724	P	9750.1	P	10385.3	P	putative protein hypothetical protein T26J14.6 - Arabidopsis thaliana, EMBL:AC011915; supported by cDNA: gi_13358202_gb_AF325010.2_AF325010
246507_at	246507_at	At5g16120	334.9	P	297.3	P	263.8	P	lipase-like protein monoglyceride lipase - Mus musculus, EMBL:AJ001118; supported by cDNA: gi_15293170_gb_AY051019.1_
246508_at	246508_at	At5g16150	159.3	A	152.4	A	109.4	A	sugar transporter-like protein putative sugar transporter - Prunus armeniaca, EMBL:AF000952; supported by cDNA: gi_16648752_gb_AY058152.1_
246509_at	246509_at	At5g16715	645.1	P	275	P	439.7	P	valine--tRNA ligase-like protein several bacterial valine--tRNA ligases
246510_at	246510_at	At5g15410	81.1	A	57.6	A	9.3	A	cyclic nucleotide-gated cation channel ; supported by cDNA: gi_3894398_gb_AF067798.1_AF067798
246511_at	246511_at	At5g15490	3616.5	P	2990.1	P	2925.6	P	UDP-glucose dehydrogenase-like protein UDP-glucose 6-dehydrogenase - Glycine max, EMBL:U53418; supported by cDNA: gi_15810322_gb_AY056200.1_
246512_at	246512_at	At5g15630	44.9	A	55.7	A	107	A	putative phytochelatin synthetase putative phytochelatin synthetase - Arabidopsis thaliana, EMBL:AJ006787
246513_at	246513_at	At5g15680	204.6	P	188.6	P	237.9	P	hypothetical protein
246514_at	246514_at	At5g15700	6.4	A	15.8	A	8.6	A	DNA-directed RNA polymerase (mitochondrial)
246515_at	246515_at	At5g15710	355.9	P	314.7	P	398.6	P	putative protein unusual floral organs protein UFO - Arabidopsis thaliana, PIR:S57710
246516_at	246516_at	At5g15740	17.1	A	12.7	A	10.1	A	putative protein auxin-independent growth promoter - Nicotiana tabacum, PIR:A44226
246517_at	246517_at	At5g15760	8	A	3.3	A	63.1	A	ribosomal protein 3 precursor-like protein plastid-specific ribosomal protein 3 precursor - Spinacia oleracea, EMBL:AF239218
246518_at	246518_at	At5g15770	70.6	A	13.7	A	10.8	A	acetyltransferase-like protein Glucosamine-6-phosphate acetyltransferase EMeg32 protein - Mus musculus, EMBL:AJ001006
246519_at	246519_at	At5g15780	110.8	P	160.9	A	150	P	proline-rich protein other proline-rich proteins
246520_at	246520_at	At5g15790	4.4	A	39.7	A	141.6	A	putative protein RING-H2 finger protein RHB1a - Arabidopsis thaliana, EMBL:AF079179
246521_at	246521_at	At5g15810	116.5	A	73.8	A	94.7	A	N2,N2-dimethylguanine tRNA methyltransferase-like protein several N2,N2-dimethylguanine tRNA methyltransferases
246522_at	246522_at	At5g15830	23.7	A	4.4	A	82.1	A	bZIP DNA-binding protein-like putative bZIP DNA-binding protein - Capsicum chinense, EMBL:AF127797
246523_at	246523_at	At5g15850	34	A	19.8	A	54.9	A	CONSTANS-like 1
246524_at	246524_at	At5g15860	137.3	A	173.2	A	121.7	A	Carboxylesterase-like protein sterol esterase - Rattus norvegicus, EMBL:Z22803
246525_at	246525_at	At5g15840	40.8	A	9	A	51	A	CONSTANS ;supported by full-length cDNA: Ceres:2588.
246526_at	246526_at	At5g15720	16.4	A	23.5	A	117.7	A	putative protein RXF26 - Arabidopsis thaliana, EMBL:AB008020;supported by full-length cDNA: Ceres:118296.
246527_at	246527_at	At5g15750	93.1	A	12.5	A	90.2	A	ribosomal protein-like 40S RIBOSOMAL PROTEINs - different species;supported by full-length cDNA: Ceres:25543.
246528_at	246528_at	At5g15640	2613.8	P	2224.4	P	2423.8	P	putative mitochondrial carrier protein Mitochondrial carrier protein - Ribes nigrum, EMBL:AJ007580;supported by full-length cDNA: Ceres:18738.
246529_at	246529_at	At5g15730	125.3	A	71.3	A	9.5	A	serine/threonine-specific protein kinase-like protein serine/threonine-specific protein kinase NPK15 - Nicotiana tabacum;supported by full-length cDNA: Ceres:25636.
246530_at	246530_at	At5g15725	33.8	A	34.6	A	61	A	Expressed protein ; supported by full-length cDNA: Ceres: 113200.
246531_at	246531_at	At5g15800	66.4	A	13.4	A	16.9	A	MADS box protein AGL2 ; supported by cDNA: gi_166589_gb_M55551.1_ATHAGL2A
246532_at	246532_at	At5g15870	1130.9	P	854.8	P	759.7	P	putative protein beta-glucan-elicitor receptor - Glycine max, EMBL:D78510
246533_at	246533_at	At5g15880	462.5	P	330.6	P	515.6	P	putative protein
246534_at	246534_at	At5g15890	351	A	6.7	A	9.3	A	putative protein several hypothetical proteins - Arabidopsis thaliana
246535_at	246535_at	At5g15900	474.9	P	96.9	A	6.3	A	putative protein several hypothetical proteins - Arabidopsis thaliana
246536_at	246536_at	At5g15920	186.6	P	166.5	P	171.4	P	putative protein KIAA0594 - Homo sapiens, EMBL:AB011166, chromosome segregation proteins
246537_at	246537_at	At5g15940	560.7	P	433.9	P	504.1	P	putative protein protochlorophyllide reductase homolog - Oryza sativa, EMBL:AF093628
246538_at	246538_at	At5g15520	125.2	P	143.9	P	47.9	A	40S RIBOSOMAL PROTEIN S19 - like 40S RIBOSOMAL PROTEIN S19 - Oryza sativa, SWISSPROT:RS19_ORYSA;supported by full-length cDNA: Ceres:255203.
246539_at	246539_at	At5g15460	326	P	264.3	P	294	P	putative protein geranylgeranylated protein NTGP5 - Nicotiana tabacum, EMBL:U64926; supported by full-length cDNA: Ceres: 250561.
246540_at	246540_at	At5g15600	17862.3	P	14784.4	P	13452.9	P	nitrilase associated protein-like nitrilase associated protein NAP16kDa - Arabidopsis thaliana, EMBL:Z96936;supported by full-length cDNA: Ceres:32451.
246541_at	246541_at	At5g15400	137.3	A	133.5	A	65.8	A	ubiquitin-fusion degradation protein-like ubiquitin-fusion degradation protein - Homo sapiens, EMBL:AF043117; supported by cDNA: gi_15215855_gb_AY050458.1_
246542_at	246542_at	At5g15020	270.2	P	254.3	P	359.7	P	transcriptional regulatory - like protein transcriptional regulatory protein (mSin3), Mus musculus, EMBL:HSSIN3A
246543_at	246543_at	At5g15060	13.2	A	14	A	20.9	A	putative protein
246544_at	246544_at	At5g15100	1178.8	P	1095.2	P	1013.4	P	auxin transport protein - like auxin transport protein (PIN7), Arabidopsis thaliana, EMBL:AF087820
246545_at	246545_at	At5g15110	10867.8	P	8591.8	P	7553.7	P	pectate lyase -like protein pectate lyase LAT59, tomato, PIR:S27098
246546_at	246546_at	At5g15090	502.8	P	257.4	P	249.2	P	voltage-dependent anion-selective channel protein hsr2 ;supported by full-length cDNA: Ceres:1417.
246547_at	246547_at	At5g14970	826.4	P	627.6	P	774.7	P	seed maturation -like protein seed maturation protein PM23, Glycine max., EMBL:AF116752;supported by full-length cDNA: Ceres:106301.
246548_at	246548_at	At5g14910	7.7	A	12.8	A	9.1	A	putative protein ;supported by full-length cDNA: Ceres:21085.
246549_at	246549_at	At5g15050	38.3	A	16.2	A	8.5	A	putative protein predicted proteins, Arabidopsis thaliana;supported by full-length cDNA: Ceres:25053.
246550_at	246550_at	At5g14920	6	A	8.6	A	4.6	A	putative protein predicted protein, Arabidopsis thaliana;supported by full-length cDNA: Ceres:32599.
246551_at	246551_at	At5g15070	2110.3	P	2179.7	P	2306.7	P	putative protein predicted proteins, Arabidopsis thliana; supported by cDNA: gi_16604622_gb_AY059756.1_
246552_at	246552_at	At5g15420	72.7	A	54.2	A	101.2	A	putative protein
246553_at	246553_at	At5g15440	62.9	A	45.6	A	14.4	A	putative protein hypothetical protein T20O10.160 - Arabidopsis thaliana, EMBL:AL163816
246554_at	246554_at	At5g15450	788.5	P	896.1	P	1206.4	P	HSP100/ClpB, putative similar to HSP100/ClpB GI:9651530 [Phaseolus lunatus]
246555_at	246555_at	At5g15470	2379.2	P	2353.2	P	2359.5	P	putative protein 68 kDa protein - Cicer arietinum, EMBL:AJ276420
246556_at	246556_at	At5g15480	25.3	A	11.8	A	87	A	putative protein hypothetical protein T4P13.29 - Arabidopsis thaliana, EMBL:AC008261
246557_at	246557_at	At5g15510	720.5	P	554.6	P	610.5	P	putative protein hypothetical protein TEL3N.1 - Arabidopsis thaliana, EMBL:AC067753
246558_at	246558_at	At5g15540	310.2	P	354.2	P	343.6	P	putative protein IDN3-B - Homo sapiens, EMBL:AB019602
246559_at	246559_at	At5g15550	136	A	149.1	A	112	A	putative protein YTM1 - Homo sapiens, EMBL:AF242546
246560_at	246560_at	At5g15560	7714.4	P	11127	P	9626.9	P	putative protein hypothetical protein F1C9.9 - Arabidopsis thaliana
246561_at	246561_at	At5g15570	380.9	P	988.3	P	1058.6	P	putative protein hypothetical protein F14P3.19 - Arabidopsis thaliana, EMBL:AC009755
246562_at	246562_at	At5g15580	45.8	A	98	A	44.4	A	putative protein unknown protein F14P3.18 - Arabidopsis thaliana, EMBL:AC009755
246563_at	246563_at	At5g15590	16.2	A	2.9	A	9.3	A	putative protein
246564_at	246564_at	At5g15610	155.3	A	131.5	A	249.8	P	putative protein hypothetical protein F14P3.15 - Arabidopsis thaliana, EMBL:AC009755
246565_at	246565_at	At5g15530	137.8	A	76.5	A	161.2	A	biotin carboxyl carrier protein precursor-like protein biotin carboxyl carrier protein (clone BP6) precursor - Brassica napus, EMBL:X90731;supported by full-length cDNA: Ceres:25607.
246566_at	246566_at	At5g14940	10.6	A	76.3	A	58.9	A	oligopeptide transporter -like protein oligopeptide transporter (LeOPT1), Lycopersicon esculentum, EMBL:AF016713
246567_at	246567_at	At5g14950	442.2	P	146.2	A	96.8	A	alpha-mannosidase -like protein mannosyl-oligosaccharide 1,3-1,6-alpha-mannosidase, mouse, PIR:A41641
246568_at	246568_at	At5g14960	68.7	A	3.7	A	4.5	A	E2F transcription factor -like protein E2F protein, Triticum sp., EMBL:TSP238590
246569_at	246569_at	At5g14980	10	A	16.6	A	33.4	A	lysophospholipase -like protein lysophospholipase homolog (HU-K5), human, EMBL:HSU67963
246570_at	246570_at	At5g14990	5.3	A	9.8	A	28.1	A	putative protein nonmuscle myosin heavy chain (NMHC), human, EMBL:HSMYONM
246571_at	246571_at	At5g15000	17.3	A	43.5	A	3.9	A	putative protein
246572_at	246572_at	At5g15010	3.2	A	7.9	A	2.4	A	putative protein predicted proteins, Arabidopsis thaliana
246573_at	246573_at	At1g31680	9.3	A	12.7	A	4.1	A	copper amine oxidase, putative similar to copper amine oxidase GI:4651202 from [Pisum sativum]
246574_at	246574_at	At1g31670	10.7	A	4.7	A	4.4	A	copper amine oxidase, putative similar to copper amine oxidase GI:685197 from [Pisum sativum]
246575_at	246575_at	At1g31660	100.5	A	44.7	A	18.3	A	bystin, putative similar to bystin GI:1160618 from [Homo sapiens]
246576_at	246576_at	At1g31650	14.1	A	85.7	A	47	A	hypothetical protein predicted by genemark.hmm
246577_at	246577_at	At1g31640	10.7	A	36.7	A	83.9	A	MADS box transcription factor, putative similar to MADS box transcription factor GI:3688589 from [Triticum aestivum]
246578_at	246578_at	At1g31630	27	A	7.3	A	13.2	A	MADS-box protein, putative similar to MADS-box protein NMH 7 GI:2827300 from [Medicago sativa]
246579_at	246579_at	At1g31620	9.8	A	4.6	A	7.6	A	hypothetical protein predicted by genemark.hmm
246580_at	246580_at	At1g31770	1458.9	P	1545.9	P	1299	P	ABC transporter, putative contains Pfam profile: PF00005: ABC transporter;supported by full-length cDNA: Ceres:95290.
246581_at	246581_at	At1g31760	4.3	A	12.4	A	17.3	A	hypothetical protein predicted by genemark.hmm; supported by full-length cDNA: Ceres: 12819.
246582_at	246582_at	At1g31750	2875.4	P	4512	P	4035.7	P	hypothetical protein predicted by genemark.hmm; supported by full-length cDNA: Ceres: 144447.
246583_at	246583_at	At5g14720	2627.6	P	3228.3	P	3059	P	protein kinase -like protein Ste-20 related kinase SPAK, Homo sapiens, EMBL:AF099989
246584_at	246584_at	At5g14730	4.6	A	119.7	A	49.9	A	putative protein predicted protein, Arabidopsis thaliana
246585_at	246585_at	At5g14750	3.9	A	19.4	A	3.6	A	myb transcription factor werewolf (WER)/ MYB66
246586_at	246586_at	At5g14770	20.1	A	60.2	A	63	A	putative protein predicted protein, Arabidopsis thaliana
246587_at	246587_at	At5g14830	47.5	A	17.8	A	13.9	A	putative protein predicted proteins, Arabidopsis thaliana
246588_at	246588_at	At5g14840	69.8	A	86.6	P	119.3	P	putative protein predicted protein, Arabidopsis thaliana
246589_at	246589_at	At5g14860	17.1	A	20	A	26.7	A	glucosyltransferase -like protein glucosyltransferase IS5a, common tobacco, PIR:T03747
246590_at	246590_at	At5g14870	3332.1	P	3605.1	P	3333.3	P	cyclic nucleotide and calmodulin-regulated ion channel -like protein cyclic nucleotide and calmodulin-regulated ion channel cngc6, Arabidopsis thaliana, EMBL:ATH17914
246591_at	246591_at	At5g14880	134	A	46	A	64	A	putative cation transport protein putative potassium transporter AtKT2p, Arabidopsis thaliana, EMBL:AF012657
246592_at	246592_at	At5g14890	5217.4	P	3646.8	P	3005.6	P	putative protein predicted protein, Arabidopsis thaliana
246593_at	246593_at	At5g14790	16.7	A	143.3	A	116.3	A	putative protein predicted protein, Arabidopsis thaliana;supported by full-length cDNA: Ceres:98046.
246594_at	246594_at	At5g14800	303.1	P	264.6	P	282.1	P	pyrroline-5-carboxylate reductase ;supported by full-length cDNA: Ceres:36386.
246595_at	246595_at	At5g14780	85.2	A	158.1	P	126	A	formate dehydrogenase (FDH) ;supported by full-length cDNA: Ceres:7530.
246596_at	246596_at	At5g14740	72.3	A	18.9	A	9.9	A	CARBONIC ANHYDRASE 2 ; supported by cDNA: gi_13265565_gb_AF324712.2_AF324712
246597_at	246597_at	At5g14760	3089.1	P	3442.1	P	3604	P	L-aspartate oxidase -like protein L-aspartate oxidase, Pseudomonas aeruginosa, PIR:T46863; supported by cDNA: gi_15010649_gb_AY045626.1_
246598_at	246598_at	At5g14850	7.8	A	44.9	A	159.8	A	dolichyl-phosphate-mannose--glycolipid alpha-mannosyltransferase -like protein dolichyl-phosphate-mannose--glycolipid alpha-mannosyltransferase PIGB, Homo sapiens, PIR:S71751; supported by cDNA: gi_15215851_gb_AY050456.1_
246599_at	246599_at	At5g14900	116.1	A	62.4	A	62.3	A	putative protein ATP-dependent RNA helicase, human, PIR:JC5785
246600_at	246600_at	At5g14930	22.3	A	9.5	A	5.9	A	putative protein disease resistance protein EDS1, Arabidopsis thaliana, PIR:T48859; supported by cDNA: gi:8699169
246601_at	246601_at	At1g31710	14.3	A	60.7	A	9.6	A	copper amine oxidase, putative similar to copper amine oxidase GI:685197 from [Pisum sativum]
246602_at	246602_at	At1g31700	47.8	A	4.6	A	4.3	A	copper amine oxidase, putative similar to copper amine oxidase GI:685197 from [Pisum sativum]
246603_at	246603_at	At1g31690	129.9	A	64.5	A	84	A	copper amine oxidase, putative similar to copper amine oxidase GI:3819099 from [Cicer arietinum]
246604_at	246604_at	At5g35310	37.3	A	8.1	A	63.6	A	putative protein
246605_at	246605_at	At5g35340	27.3	A	76	A	51.1	A	putative protein predicted proteins, Arabidopsis thaliana
246606_at	246606_at	At5g35350	4.8	A	55.6	A	80.8	A	putative protein
246607_at	246607_at	At5g35370	993	P	975.2	P	1203.6	P	receptor-like protein kinase - like protein receptor-like protein kinase, Arabidopsis thaliana, EMBL:ATRLPKB
246608_at	246608_at	At5g35380	8220.6	P	12739.9	P	10964.1	P	putative protein various predicted protein kinases, Arabidopsis thaliana
246609_at	246609_at	At5g35390	9508.6	P	11987.1	P	11226	P	putative receptor-like protein kinase receptor-like protein kinase PRK1, Lycopersicon esculentum, PIR:T07865
246610_at	246610_at	At5g35400	4.9	A	63.2	A	6.3	A	putative protein
246611_at	246611_at	At5g35330	488.9	P	313.5	P	401.3	P	putative protein predicted proteins, Arabidopsis thaliana;supported by full-length cDNA: Ceres:40501.
246612_at	246612_at	At5g35320	1976.1	P	1757.6	P	3113	P	putative protein ;supported by full-length cDNA: Ceres:38281.
246613_at	246613_at	At5g35360	155.9	P	187.6	P	144.9	P	acetyl-CoA carboxylase ;supported by full-length cDNA: Ceres:20286.
246614_at	246614_at	At5g35410	591.7	P	677.2	P	554.8	P	serine/threonine protein kinase SOS2 (gb|AAF62923.1) ; supported by cDNA: gi_14701909_gb_AF395081.1_AF395081
246615_at	246615_at	At5g35420	88.1	A	14.3	A	10.5	A	putative protein similar to unknown protein (gb|AAD56332.1)
246616_at	246616_at	At5g36260	8151.7	P	8862.1	P	8228	P	aspartyl protease-like
246617_at	246617_at	At5g36270	10.3	A	28.4	A	93.3	A	GSH-dependent dehydroascorbate reductase 1-like
246618_at	246618_at	At5g36280	73.3	A	14.7	A	100.8	A	putative protein similar to unknown protein (pir||T02351)
246619_at	246619_at	At5g36290	1428.8	P	986.1	P	1200.9	P	transmembrane protein FT27/PFT27-like ;supported by full-length cDNA: Ceres:12993.
246620_at	246620_at	At5g36220	124.9	P	52.2	A	71	A	cytochrome P450 ; supported by cDNA: gi_3164141_dbj_D78606.1_D78606
246621_at	246621_at	At5g36230	423.7	P	317.7	P	318.4	P	putative protein strong similarity to unknown protein (gb|AAD26879.1); supported by cDNA: gi_16323076_gb_AY057642.1_
246622_at	246622_at	At5g36250	123.2	P	58.7	A	167	P	protein phosphatase-2C PP2C-like ; supported by cDNA: gi_16974563_gb_AY061752.1_
246623_at	246623_at	At1g48920	200.6	P	180.4	P	110.8	A	nuM1 protein, putative similar to nuM1 protein GI:1279562 from [Medicago sativa]
246624_at	246624_at	At1g48910	65	A	64.6	A	55.7	A	flavin-containing monooxygenase, putative similar to flavin-containing monooxygenase 4 GI:31429 from [Homo sapiens]
246625_at	246625_at	At1g48880	641.1	P	726.9	P	849.5	P	hypothetical protein predicted by genscan+
246626_at	246626_at	At1g48870	125.4	A	179.7	A	55.8	A	hypothetical protein contains similarity to rab11 binding protein GI:4512103 from [Bos taurus]
246627_s_at	246627_s_at	At1g48860	716.3	P	420.1	P	553.7	P	5-enolpyruvylshikimate-3-phosphate (EPSP) synthase, putative similar to 5-enolpyruvylshikimate-3-phosphate (EPSP) synthase GI:2583124 from (Arabidopsis thaliana);supported by full-length cDNA: Ceres:270032.
246628_at	246628_at	At1g48900	1915.7	P	1816	P	1966.1	P	signal recognition particle 54 kDa protein 2 (SRP54), putative similar to signal recognition particle 54 kDa protein 2 (SRP54) GI:556901 from [Lycopersicon esculentum]; supported by cDNA: gi_15450460_gb_AY052331.1_
246629_at	246629_at	At1g50750	4.2	A	43.5	A	19.9	A	unknown protein similar to hypothetical protein GI:7268354 from [Arabidopsis thaliana]
246630_at	246630_at	At1g50730	108.7	A	119	A	78.9	A	hypothetical protein predicted by genemark.hmm
246631_at	246631_at	At1g50740	16306.1	P	11689.6	P	11354	P	unknown protein ; supported by full-length cDNA: Ceres: 34587.
246632_at	246632_at	At1g29710	75.7	A	41.2	A	42.2	A	hypothetical protein similar to putative selenium-binding protein GI:6598404 from [Arabidopsis thaliana]
246633_at	246633_at	At1g29720	5.7	A	4.1	A	4.1	A	hypothetical protein ; supported by cDNA: gi_13605878_gb_AF367338.1_AF367338
246634_at	246634_at	At1g31730	752.7	P	666.9	P	780.7	P	epsilon-adaptin, putative similar to epsilon-adaptin GI:5689377 from [Homo sapiens]
246635_at	246635_at	At1g31720	3.6	A	108.2	A	61.8	A	hypothetical protein predicted by genemark.hmm
246636_at	246636_at	At5g34850	6321.1	P	7347.9	P	6467.2	P	acid phosphatase-like protein purple acid phosphatase - Ipomoea batatas, EMBL:AJ006224; supported by cDNA: gi_15292756_gb_AY050812.1_
246637_at	246637_at	At5g34870	6.7	A	7.6	A	18.1	A	putative protein polymorphic membrane protein B/C family TC0695, Chlamydia muridarum, PIR:D81675
246638_at	246638_at	At5g34880	54.2	A	17.5	A	59	P	putative protein predicted proteins, Arabidopsis thaliana
246639_x_at	246639_x_at	At5g34895	16.7	A	143.5	P	55.5	A	adenylate kinase -like protein predicted proteins, Arabidopsis thaliana
246640_x_at	246640_x_at	At5g34900	54.7	A	218.5	P	160.8	P	putative protein predicted proteins, Arabidopsis thaliana
246641_s_at	246641_s_at	At5g34885	8.4	A	52.9	A	66.1	A	Expressed protein ; supported by full-length cDNA: Ceres: 24263.
246642_s_at	246642_s_at	At5g34920	22.3	A	94.3	A	44.5	A	putative protein predicted proteins, Arabidopsis thaliana
246643_s_at	246643_s_at	At5g34990	3.6	A	5.6	A	3.5	A	putative protein various predicted proteins, Arabidopsis thaliana
246644_at	246644_at	At5g35100	133.7	P	72.8	A	39	A	putative protein
246645_at	246645_at	At5g35080	715.7	P	434.4	P	598.8	P	putative protein ;supported by full-length cDNA: Ceres:232091.
246646_at	246646_at	At5g35090	5704.4	P	4907.9	P	5079.6	P	putative protein ;supported by full-length cDNA: Ceres:42538.
246647_at	246647_at	At5g35130	10.9	A	76	A	27.7	A	putative protein predicted proteins from different species
246648_at	246648_at	At5g35140	14.4	A	48.7	A	6.6	A	putative protein predicted proteins from different species
246649_at	246649_at	At5g35150	69.9	A	79.4	A	17.9	A	putative protein predicted proteins, Arabidopsis thaliana
246650_at	246650_at	At5g35160	311	P	177.3	P	254.3	P	putative protein p76, Homo sapiens, EMBL:HSU81006
246651_at	246651_at	At5g35170	192.2	P	180.2	P	178.4	P	adenylate kinase -like protein adenylate kinase (EC 2.7.4.3), chloroplast, maize, PIR:S45634
246652_at	246652_at	At5g35190	3.8	A	2.6	A	5.4	A	extensin -like protein extensin, soybean, PIR:T06782
246653_at	246653_at	At5g35200	4445.4	P	5031.2	P	5374.9	P	putative protein clathrin assembly protein short form, Rattus norvegicus, EMBL:AF041373
246654_s_at	246654_s_at	At5g35210	429.1	P	373.8	P	306.1	P	putative protein predicted protein from Synechocystis sp.
246655_at	246655_at	At5g35230	68.5	A	5	A	6.6	A	hypothetical protein
246656_at	246656_at	At5g35240	12.4	A	8.1	A	54.4	A	hypothetical protein
246657_at	246657_at	At5g35250	7.5	A	23.8	A	21.5	A	putative protein predicted proteins, Arabidopsis thaliana
246658_at	246658_at	At5g35260	2.2	A	31.2	A	41	A	putative protein predicted proteins, Arabidopsis thaliana
246659_at	246659_at	At5g35270	93.9	M	92	A	41.9	A	putative protein predicted proteins Arabidopsis thaliana
246660_at	246660_at	At5g35180	3516	P	3504	P	3071.2	P	putative protein predicted protein, Arabidopsis thaliana; supported by cDNA: gi_16930704_gb_AF436836.1_AF436836
246661_at	246661_at	At5g35280	88.7	A	15.4	A	2.8	A	putative protein various predicted proteins, Arabidopsis thaliana
246662_at	246662_at	At5g35290	2.2	A	9.2	A	5.5	A	putative protein
246663_at	246663_at	At5g35300	48.3	A	17.5	A	6	A	putative protein
246664_at	246664_at	At5g34800	24.9	A	51.4	A	9.2	A	putative protein predicted proteins - Arabidopsis thaliana
246665_s_at	246665_s_at	At5g34820	8.5	A	11.3	A	13.8	A	putative protein predicted proteins - Arabidopsis thaliana
246666_at	246666_at	At5g34830	69.8	A	128.4	A	63.2	A	hypothetical protein
246667_at	246667_at	At5g34840	8.9	A	12	A	125.7	P	putative protein hypothetical proteins - Arabidopsis thaliana
246668_at	246668_at	At5g29397	2.3	A	50.9	A	3.1	A	putative protein
246669_at	246669_at	At5g29958	19.8	A	16.4	A	11.6	A	galactinol synthase, putative
246670_at	246670_at	At5g29584	23.2	A	37.8	A	48.5	A	putative protein
246671_at	246671_at	At5g30820	17.8	A	27.4	A	7.6	A	putative protein
246672_at	246672_at	At5g30426	6.4	A	99.4	A	52.5	A	putative protein
246673_at	246673_at	At5g29771	44.8	A	48.3	A	104.4	A	ribosomal protein S1 ;supported by full-length cDNA: Ceres:4565.
246674_at	246674_at	At5g30145	440.9	P	642.3	P	654.4	P	bcnt-like protein ; supported by full-length cDNA: Ceres: 9811.
246675_at	246675_at	At5g31411	3.7	A	45.5	A	6.2	A	putative protein
246676_at	246676_at	At5g31017	3	A	6.3	A	10.4	A	putative protein
246677_at	246677_at	At5g32202	4.9	A	5.8	A	5.5	A	putative protein predicted proteins - Arabidopsis thaliana
246678_at	246678_at	At5g33200	53.2	A	35.4	A	37.1	A	putative protein predicted replication A1 proteins - Arabidopsis thaliana
246679_at	246679_at	At5g33240	74.1	A	4.3	A	7.6	A	putative protein replication protein A1 - Xenopus laevis, PIR:A43458
246680_at	246680_at	At5g33260	7.7	A	16.7	A	5	A	putative protein predicted proteins - Arabidopsis thaliana
246681_at	246681_at	At5g33280	10.3	A	13.3	A	19.8	A	chloride channel-like protein chloride channel protein ClC-1 - Nicotiana tabacum, PIR:T02939
246682_at	246682_at	At5g33290	68	A	108.9	A	31.6	A	putative protein EXOSTOSIN-1 (PUTATIVE TUMOR SUPPRESSOR PROTEIN EXT1) - Homo sapiens, EMBL:S79639
246683_at	246683_at	At5g33300	274.7	P	385.1	P	369.6	P	putative protein chromokinesin KIF4 - Homo sapiens, EMBL:AF179308
246684_at	246684_at	At5g33340	15.1	A	38.5	A	3.5	A	putative protein nucleoid DNA-binding protein cnd41, chloroplast - Nicotiana tabacum, PIR:T01996
246685_at	246685_at	At5g33350	100.1	A	6.3	A	12.5	A	putative protein nucleoid DNA-binding protein cnd41, chloroplast - Nicotiana tabacum, PIR:T01996
246686_at	246686_at	At5g33380	27.3	A	5.9	A	8.8	A	putative protein predicted proteins - Arabidopsis thaliana
246687_at	246687_at	At5g33370	8.5	A	15.7	A	4.3	A	putative protein proline-rich protein APG - Arabidopsis thaliana, PIR:S21961; supported by full-length cDNA: Ceres: 34612.
246688_at	246688_at	At5g34450	34.4	A	12.8	A	56.7	A	putative protein predicted proteins - Arabidopsis thaliana
246689_at	246689_at	At5g34460	23.5	A	1.8	A	21.1	A	putative protein predicted proteins - Arabidopsis thaliana
246690_at	246690_at	At5g34770	22.9	A	18.9	A	15.4	A	hypothetical protein
246691_at	246691_at	At5g34790	80.4	A	45.5	A	98.5	A	putative protein predicted proteins - Arabidopsis thaliana
246692_at	246692_at	At5g29060	6.1	A	54.5	A	42.1	A	putative protein predicted protein, Arabidopsis thaliana
246693_at	246693_at	At5g29070	8	A	11.6	A	7.8	A	putative protein
246694_at	246694_at	At5g29080	7.6	A	4.9	A	134.8	A	putative protein
246695_at	246695_at	At5g29090	6.8	A	5.8	A	8.4	A	putative protein
246696_at	246696_at	At5g29100	7.2	A	10.4	A	5.9	A	putative protein predicted protein, Arabidopsis thaliana
246697_at	246697_at	At5g29210	7.5	A	10.7	A	24.1	A	putative protein
246698_at	246698_at	At5g30332	34.3	A	14.3	A	14.7	A	putative protein
246699_at	246699_at	At5g27990	122.4	M	11.4	A	18.1	A	putative protein predicted proteins, Saccharomyces cerevisiae and Schizosaccharomyces pombe;supported by full-length cDNA: Ceres:5109.
246700_at	246700_at	At5g28030	10.6	A	6.1	A	11.8	A	cysteine synthase - like cysteine synthase, Arabidopsis thaliana, EMBL:AB024283;supported by full-length cDNA: Ceres:108171.
246701_at	246701_at	At5g28020	36.8	A	4.1	A	10.1	A	cysteine synthase ;supported by full-length cDNA: Ceres:154690.
246702_at	246702_at	At5g28050	238.2	P	179.4	P	227.5	P	putative cytidine deaminase - like putative cytidine deaminase, Cicer arietinum, EMBL:AJ006764;supported by full-length cDNA: Ceres:37242.
246703_at	246703_at	At5g28080	10.4	A	20.8	A	49.1	A	mitogen activated protein kinase - like probable mitogen activated protein kinase , Oryza sativa, PIR:T02951
246704_at	246704_at	At5g28090	55.7	A	61.9	A	87.3	A	putative protein
246705_x_at	246705_x_at	At5g28110	782.7	P	737.6	P	762.6	P	putative protein predicted resistance protein, Arabidopsis thaliana
246706_at	246706_at	At5g28130	11.2	A	4.8	A	10.4	A	putative protein predicted proteins, Arabidopsis thaliana
246707_at	246707_at	At5g28140	18.4	A	26	A	10.1	A	putative protein
246708_at	246708_at	At5g28150	1301.8	P	554.2	P	757.6	P	putative protein various predicted proteins, Arabidopsis thaliana
246709_s_at	246709_s_at	At5g28160	1.9	A	7.9	A	79.2	A	putative protein many predicted proteins, Arabidopsis thaliana
246710_at	246710_at	At5g28170	48.6	A	81.3	A	74	A	putative protein predicted proteins, Arabidopsis thaliana
246711_at	246711_at	At5g28190	11.5	A	70.1	A	97.1	A	putative protein
246712_at	246712_at	At5g28200	10	A	42	A	43.8	A	putative protein various predicted proteins, Arabidopsis thaliana
246713_at	246713_at	At5g28210	120.2	A	86.5	A	112.9	A	mRNA capping enzyme - like capping enzyme 1a, Xenopus laevis, PIR:JC7197
246714_at	246714_at	At5g28220	7.9	A	7.8	A	49.2	A	putative protein predicted proteins, Arabidopsis thaliana, D.melanogaster, C.elegans and S.pombe
246715_at	246715_at	At5g28230	140.2	A	32.1	A	94.5	A	putative protein glucose-6-phosphate/phosphate-translocator precursor, Zea mays, PIR:T01210
246716_s_at	246716_s_at	At5g28910	10.3	A	28.4	A	57	A	putative protein
246717_at	246717_at	At5g28920	113.2	A	7.2	A	17.9	A	putative protein
246718_at	246718_at	At5g28930	8.5	A	40.3	A	4	A	putative protein various predicted proteins, Arabidopsis thaliana
246719_at	246719_at	At5g28940	27.4	A	26.6	A	42	A	homology to many predicted putative replication proteins eg EMBL:AC007662 replication protein A1, Xenopus laevis, PIR:A43458
246720_at	246720_at	At5g28950	80.7	M	78.1	A	73.8	A	putative protein predicted proteins, Arabidopsis thaliana and Sorghum bicolor
246721_at	246721_at	At5g29010	37.5	A	64.9	A	94.3	A	putative protein glycine-rich protein, Phalaenopsis sp., EMBL:PS34746
246722_at	246722_at	At5g29020	53.1	A	77.7	A	5.2	A	putative protein various predicted proteins, Arabidopsis thaliana
246723_at	246723_at	At5g29030	16.5	A	10.6	A	26.3	A	putative protein various predicted proteins, Arabidopsis thaliana
246724_at	246724_at	At5g29000	194.6	P	224.9	A	107.8	A	putative protein CDPK substrate protein 1, Mesembryanthemum crystallinum, EMBL:AF219972;supported by full-length cDNA: Ceres:13378.
246725_at	246725_at	At5g29040	72.1	M	9.1	A	57.5	A	putative protein various predicted proteins, Arabidopsis thaliana
246726_at	246726_at	At5g29050	39.1	A	3	A	108.1	A	putative protein predicted protein, Arabidopsis thaliana
246727_at	246727_at	At5g28010	215.9	P	208.8	P	180	P	major latex protein homolog - like major latex protein homolog, common ice plant, PIR:T12249
246728_at	246728_at	At5g28040	1364.2	P	1832.1	P	2062	P	putative protein various predicted proteins, Arabidopsis thaliana and Oryza sativa
246729_at	246729_at	At5g28070	2.5	A	54.6	A	4	A	putative protein
246730_at	246730_at	At5g28060	83.7	A	105.9	A	81.5	A	40S ribosomal protein S19 - like 40S ribosomal protein S19, Cyanophora paradoxa, EMBL:CPA245654;supported by full-length cDNA: Ceres:27178.
246731_at	246731_at	At5g27630	853	P	854.5	P	963.3	P	putative protein RING finger rngB protein, cytosolic - Dictyostelium discoideum, PIR:S68824
246732_at	246732_at	At5g27650	527.9	P	530.3	A	563.5	P	putative protein hypothetical protein F22F7.12 - Arabidopsis thaliana, EMBL:AC009606
246733_at	246733_at	At5g27660	30.2	A	39.4	A	16.9	A	serine protease-like protein serine protease OMI - Homo sapiens, EMBL:AF020760
246734_at	246734_at	At5g27680	194.3	P	77.7	A	35.3	A	putative protein WRN (Werner syndrome) protein - Mus musculus, EMBL:AF241636; supported by cDNA: gi_16604618_gb_AY059754.1_
246735_at	246735_at	At5g27670	480.3	P	523.7	P	792.7	P	histone H2A-like protein histone H2A - Brassica napus, EMBL:AJ245999; supported by cDNA: gi_14326515_gb_AF385711.1_AF385711
246736_at	246736_at	At5g27560	55.8	A	15.1	A	14.2	A	putative protein hypothetical protein slr1702 - Synechocystis sp., PIR:S75312; supported by cDNA: gi_13877992_gb_AF370259.1_AF370259
246737_at	246737_at	At5g27710	394.7	P	193.5	P	240.4	P	putative protein
246738_at	246738_at	At5g27740	19.5	A	25.9	A	6.9	A	replication factor C - like replication factor C 38K chain, Homo sapiens, PIR:T09573
246739_at	246739_at	At5g27800	36.9	A	96	A	42.3	A	putative protein predicted protein, Arabidopsis thaliana
246740_at	246740_at	At5g27810	16.9	A	6	A	45.2	A	putative protein
246741_at	246741_at	At5g27720	182	P	81	A	133.3	A	glycine rich protein - like glycine rich protein, Nicotiana tabacum, PIR:S54169;supported by full-length cDNA: Ceres:39561.
246742_at	246742_at	At5g27840	1979.4	P	1995.9	P	1731.8	P	TOPP8 serine/threonine protein phosphatase type one ;supported by full-length cDNA: Ceres:38656.
246743_at	246743_at	At5g27750	680.2	P	341.6	P	315	M	putative protein predicted proteins, Arabidopsis thaliana;supported by full-length cDNA: Ceres:153200.
246744_at	246744_at	At5g27760	3190.2	P	3802.8	P	3605	P	putative protein predicted protein, Arabidopsis thaliana; supported by full-length cDNA: Ceres: 108472.
246745_at	246745_at	At5g27770	111.3	A	55.5	A	21.4	A	60S ribosomal protein L22 - like ribosomal protein L22 (cytosolic), Rattus norvegicus, PIR:S52084; supported by full-length cDNA: Ceres: 19722.
246746_at	246746_at	At5g27820	103.8	A	74.6	A	63.7	A	putative protein predicted proteins, Oryza sativa and Arabidopsis thaliana;supported by full-length cDNA: Ceres:20143.
246747_at	246747_at	At5g27700	500.4	P	482.6	P	384.9	P	ribosomal protein S21 - like ribosomal protein S21, Zea mays, PIR:T03945;supported by full-length cDNA: Ceres:93174.
246748_at	246748_at	At5g27730	112.7	A	20.6	A	48.7	A	putative protein predicted protein, Drosophila melanogaster; supported by cDNA: gi_14334591_gb_AY034969.1_
246749_at	246749_at	At5g27830	13.6	A	82.8	A	54.3	A	putative protein ; supported by cDNA: gi_14532675_gb_AY039962.1_
246750_at	246750_at	At5g27860	119.4	P	167.1	P	136.3	P	putative protein predicted proteins, Drosophila melanogaster, Caenorhabditis elegans and Arabidopsis thaliana
246751_at	246751_at	At5g27870	1123.3	P	1232.5	P	997.5	P	pectin methyl-esterase - like protein pectin methyl-esterase PER, Medicago truncatula, EMBL:MTR249611
246752_at	246752_at	At5g27890	80.3	A	26	A	8.1	A	putative protein predicted proteins, Arabidopsis thaliana
246753_at	246753_at	At5g27900	15.5	A	14.2	A	6.1	A	putative protein
246754_at	246754_at	At5g27910	43.1	A	94.9	A	82.7	A	transcription factor - like protein Hap5a transcription factor, Arabidopsis thaliana, EMBL:Y13726
246755_at	246755_at	At5g27920	269.3	P	164.4	P	229	P	F-box protein family contains similarity to leucine-rich repeats containing F-box protein FBL3 GI:5919219 from [Homo sapiens]
246756_at	246756_at	At5g27930	6.7	A	30.7	A	15.2	A	protein phosphatase - like protein phosphatase-2C, Mesembryanthemum crystallinum, EMBL:AF075581;supported by full-length cDNA: Ceres:23348.
246757_at	246757_at	At5g27940	204.1	M	206.3	P	206.4	P	Expressed protein ; supported by full-length cDNA: Ceres: 19054.
246758_at	246758_at	At5g27850	169.1	P	161.9	P	228	P	60S ribosomal protein - like 60S ribosomal protein L18, Arabidopsis thaliana, SWISSPROT:RL18_ARATH; supported by cDNA: gi_15810152_gb_AY056141.1_
246759_at	246759_at	At5g27950	199.5	P	215.6	P	282.6	P	putative protein kinesin heavy chain-like protein, potato, PIR:T07397
246760_at	246760_at	At5g27970	408.3	P	307.9	P	414.1	P	putative protein predicted proteins, Caenorhabditis elagans and Saccharomyces cerevisiae
246761_at	246761_at	At5g27980	533	P	731.1	P	679.5	P	embryonic abundant protein - like embryonic abundant protein gD-34, upland cotton, PIR:S04046
246762_at	246762_at	At5g27620	263.4	P	270.5	P	217.7	P	cyclin H-like protein cycH (CAK associated cyclinH homolog) - Populus tremula x Populus tremuloides, EMBL:AF092743
246763_at	246763_at	At5g27150	3539.9	P	3190.7	P	3316.6	P	NHE1 Na+/H+ exchanger ; supported by cDNA: gi_6650176_gb_AF056190.1_AF056190
246764_s_at	246764_s_at	At5g27310	44	A	19.9	A	2.8	A	putative protein At2g27780 and At2g13640 - Arabidopsis thaliana, EMBL:AC005824, EMBL:AC007063
246765_at	246765_at	At5g27330	90.4	A	32.7	A	43.4	A	glutamic acid-rich protein hypothetical protein T12H1.9 - Arabidopsis thaliana, EMBL:AC009177
246766_at	246766_at	At5g27340	84.4	A	64.6	A	120	P	hypothetical protein
246767_at	246767_at	At5g27390	105.1	A	65.6	A	131.7	P	putative protein CG6949 - Drosophila melanogaster, EMBL:AE003739
246768_at	246768_at	At5g27400	49.5	A	21.7	A	6.3	A	putative protein hypothetical proteins - different species
246769_at	246769_at	At5g27440	62.6	A	96.2	A	66.1	A	hypothetical protein
246770_at	246770_at	At5g27460	250.2	P	91.7	A	207.9	P	putative protein DNA-binding protein - Triticum aestivum, EMBL:AF091837
246771_at	246771_at	At5g27480	8.1	A	48.9	A	10.8	A	putative protein putative replication proteins - Arabidopsis thaliana
246772_at	246772_at	At5g27490	654.7	P	396	P	397	P	putative protein unknown protein T12H1.25 - Arabidopsis thaliana, EMBL:AC009177
246773_at	246773_at	At5g27510	116.2	P	95.8	A	48.5	A	protein kinase-like protein MAP3Ka MEK kinase - Arabidopsis thaliana, EMBL:U58918
246774_at	246774_at	At5g27530	21.8	A	38.9	A	23.7	A	polygalacturonase-like protein polygalacturonase - Lycopersicon esculentum, EMBL:AF118567
246775_at	246775_at	At5g27540	595.5	P	441.5	P	578.4	P	putative protein GTP-binding proteins at the N-terminus
246776_at	246776_at	At5g27550	68	A	30.8	A	144.7	P	kinesin-like protein kinesin-like heavy chain - Arabidopsis thaliana, EMBL:AF080249
246777_at	246777_at	At5g27420	221	P	305.3	P	370.8	P	RING-H2 zinc finger protein-like RING-H2 zinc finger protein ATL6 - Arabidopsis thaliana, EMBL:AF132016;supported by full-length cDNA: Ceres:106078.
246778_at	246778_at	At5g27450	604.8	P	639.8	P	594.8	P	mevalonate kinase supported by full-length cDNA: Ceres:1045.
246779_at	246779_at	At5g27520	2068.6	P	2869.3	P	2857.8	P	putative protein peroxisomal integral membrane protein - Homo sapiens;supported by full-length cDNA: Ceres:20865.
246780_at	246780_at	At5g27470	277.1	P	212.5	P	157.7	P	seryl-tRNA synthetase ; supported by cDNA: gi_15293240_gb_AY051054.1_
246781_at	246781_at	At5g27350	212.3	P	500.7	P	399.6	P	sugar transporter-like protein putative sugar transporter (SUGTL2) - Arabidopsis thaliana, EMBL:AJ249968; supported by cDNA: gi_15294181_gb_AF410282.1_AF410282
246782_at	246782_at	At5g27320	42.2	A	89.8	A	66.5	A	putative protein PrMC3 - Pinus radiata, EMBL:AF110333 and to estereases of different species; supported by cDNA: gi_15451145_gb_AY054653.1_
246783_at	246783_at	At5g27360	109.7	A	217.7	P	131.9	M	sugar transporter-like protein putative sugar transporter (SUGTL1) - Arabidopsis thaliana, EMBL:AJ249967; supported by cDNA: gi_14585700_gb_AY026255.1_
246784_at	246784_at	At5g27430	405.8	P	261.2	P	379.7	P	signal peptidase ; supported by cDNA: gi_3044217_gb_AF057144.1_AF057144
246785_at	246785_at	At5g27380	201.9	P	113.3	M	92.8	A	glutathione synthetase gsh2 non-consensus AT donor splice site at exon 6, AC acceptor splice site at exon 7; supported by cDNA: gi_758451_gb_U22359.1_ATU22359
246786_at	246786_at	At5g27410	5.9	A	14.4	A	7	A	putative amino acid aminotransferase branched-chain amino acid aminotransferase - Pseudomonas aeruginosa, SWISSPROT:ILVE_PSEAE; supported by cDNA: gi_13605848_gb_AF367323.1_AF367323
246787_s_at	246787_s_at	At5g27570	2	A	4.8	A	39.6	A	cdc20-like protein putative cdc20 protein - Arabidopsis thaliana, EMBL:AF029262
246788_at	246788_at	At5g27580	71.8	A	79.6	A	71	A	putative protein hypothetical proteins - Arabidopsis thaliana, weak similarity to MADS-box proteins
246789_at	246789_at	At5g27600	425.9	P	505.7	P	434.5	P	long-chain-fatty-acid--CoA ligase-like protein long-chain-fatty-acid--CoA ligase - Brassica napus, EMBL:Z72152
246790_at	246790_at	At5g27610	6042.1	P	6317.3	P	5382.8	P	putative protein unknown protein F22F7.18 - Arabidopsis thaliana, EMBL:AC009606
246791_at	246791_at	At5g27280	181.8	P	88.6	A	47.8	A	putative protein predicted proteins, Arabidopsis thaliana, Drosophila melanogaster and Saccharomyces cerevisiae;supported by full-length cDNA: Ceres:23239.
246792_at	246792_at	At5g27290	37.7	A	15.4	A	34.9	A	putative protein predicted proteins, Arabidopsis thaliana;supported by full-length cDNA: Ceres:38304.
246793_at	246793_at	At5g27210	352.3	P	461.9	P	358.5	P	putative protein seven transmembrane domain orphan receptor, Mus musculus, EMBL:AF051098;supported by full-length cDNA: Ceres:96808.
246794_s_at	246794_s_at	At5g27010	105.7	A	80.4	A	76.9	A	putative protein predicted proteins, Arabidopsis thaliana and Homo sapiens
246795_at	246795_at	At5g27020	17.3	A	5.3	A	65.5	A	putative protein
246796_at	246796_at	At5g26770	173.2	A	96.9	A	159.2	A	putative protein myosin heavy chain, chicken, PIR:S24348;supported by full-length cDNA: Ceres:147806.
246797_at	246797_at	At5g26790	4.4	A	94	A	32.2	A	putative protein ;supported by full-length cDNA: Ceres:39714.
246798_at	246798_at	At5g26930	66.2	A	100.4	A	27.9	A	putative protein various predicted proteins, Arabidopsis thaliana;supported by full-length cDNA: Ceres:27625.
246799_at	246799_at	At5g26940	553.5	P	469.8	P	297.4	P	putative protein various predicted bacterial DNA polymerase subunits;supported by full-length cDNA: Ceres:32265.
246800_at	246800_at	At5g26780	96.8	A	58.8	A	83.3	A	glycine hydroxymethyltransferase - like protein glycine hydroxymethyltransferase, Solanum tuberosum, EMBL:Z25863; supported by cDNA: gi_14334887_gb_AY035117.1_
246801_at	246801_at	At5g26830	316.7	P	256.6	P	185.3	P	threonyl-tRNA synthetase ; supported by cDNA: gi_15081625_gb_AY048205.1_
246802_at	246802_at	At5g27000	5431.2	P	6546	P	5940	P	kinesin-like heavy chain non-consensus AT donor splice site at exon 12; non-consensus AC acceptor splice site at exon 13; supported by cDNA: gi_3421377_gb_AF080249.1_AF080249
246803_at	246803_at	At5g26980	114.8	A	195.7	P	247.4	P	tSNARE AtTLG2a ; supported by cDNA: gi_4932458_gb_AF067789.2_AF067789
246804_at	246804_at	At5g27040	4.1	A	4	A	2.8	A	putative protein
246805_at	246805_at	At5g27050	3.4	A	9.9	A	9.3	A	putative protein various predicted transcription factors, Arabidopsis thaliana
246806_at	246806_at	At5g27080	5.1	A	61	A	3.4	A	putative cdc20 protein
246807_at	246807_at	At5g27100	409.9	P	487.1	P	431.9	P	ion channel - like protein ligand gated channel-like protein, Brassica napus, EMBL:AF109392
246808_at	246808_at	At5g27110	75.8	A	60.1	A	56.7	A	putative protein many predicted proteins, Arabidopsis thaliana
246809_s_at	246809_s_at	At5g27140	7.9	A	21	A	98	A	SAR DNA-binding protein - like SAR DNA-binding protein-1, garden pea, PIR:T06377
246810_at	246810_at	At5g27160	11.8	A	12	A	4.1	A	putative protein many predicted proteins, Arabidopsis thaliana
246811_at	246811_at	At5g27170	40.5	A	10.7	A	44.6	A	putative protein
246812_at	246812_at	At5g27180	216.6	P	294.6	P	314	P	putative protein predicted proteins, Arabidopsis thaliana
246813_at	246813_at	At5g27190	12.6	A	75.3	A	4.2	A	putative protein various predicted proteins, Arabidopsis thaliana
246814_at	246814_at	At5g27200	201.7	P	137.1	P	122.8	P	acyl carrier protein precursor - like acyl carrier protein precursor, field mustard, PIR:A26860
246815_at	246815_at	At5g27220	102.8	P	90.2	P	109.4	P	putative protein integrin analogue, Saccharomyces cerevisiae, EMBL:SCINTANA
246816_at	246816_at	At5g27230	25.9	A	32.4	A	146.6	P	putative protein
246817_at	246817_at	At5g27240	32.2	A	127	A	63.2	A	putative protein various predicted proteins, Arabidopsis thaliana
246818_at	246818_at	At5g27270	13.2	A	9.1	A	4.7	A	putative protein crp1, Zea mays, PIR:T01685
246819_at	246819_at	At5g26900	4.3	A	46	A	34	A	WD-repeat protein - like WD-repeat protein, carrot, PIR:T14352
246820_at	246820_at	At5g26910	102.8	A	19.2	A	23.6	A	putative protein predicted proteins, Arabidopsis thaliana
246821_at	246821_at	At5g26920	13.2	A	7.2	A	3.6	A	calmodulin-binding - like protein calmodulin-binding protein TCB60, Nicotiana tabacum, EMBL:U58971
246822_at	246822_at	At5g26960	12.8	A	103.1	A	118.3	A	putative protein predicted proteins, Arabidopsis thaliana and Oryza sativa
246823_at	246823_at	At5g26970	3.7	A	24.4	A	4.4	A	putative protein
246824_at	246824_at	At5g26990	2241.7	P	2728.8	P	2669.9	P	drought-induced protein - like non-consensus AT donor splice site at exon 3, AC acceptor splice site at exon 4, drought-induced protein Di19, Arabidopsis thaliana, EMBL:X78584
246825_at	246825_at	At5g26260	11.5	A	3.5	A	9.7	A	putative protein various predicted proteins, Arabidopsis thaliana; supported by cDNA: gi_15293178_gb_AY051023.1_
246826_at	246826_at	At5g26310	24.1	A	12.5	A	6	A	UTP-glucose glucosyltransferase - like protein UTP-glucose glucosyltransferase, cassava, PIR:S41951
246827_at	246827_at	At5g26330	70.4	A	71.1	A	64.4	A	copper binding - like protein mavicyanin, zucchini, PIR:S72218
246828_at	246828_at	At5g26350	52.4	A	5.4	A	10.1	A	putative protein hypothetical protein, Plasmodium falciparum
246829_at	246829_at	At5g26570	105.1	A	103.9	A	137.8	A	putative protein pyruvate water dikinase, Archaeoglobus fulgidus, PIR:F69338
246830_at	246830_at	At5g26360	4.9	A	48.2	A	18.7	A	chaperonin gamma chain - like protein chaperonin containing TCP-1 complex gamma chain, African clawed frog, PIR:S54210; supported by cDNA: gi_14532703_gb_AY039976.1_
246831_at	246831_at	At5g26340	30.2	A	253.8	P	132	P	hexose transporter - like protein hexose transporter HT2, Lycopersicon esculentum, EMBL:LES132224; supported by cDNA: gi_15010579_gb_AY045591.1_
246832_at	246832_at	At5g26595	1318.3	P	1372.5	P	1524.8	P	putative protein isopenicillin N epimerase, Streptomyces clavuligerus, EMBL:M32324
246833_at	246833_at	At5g26615	148.3	A	132.9	A	85.2	A	putative protein
246834_at	246834_at	At5g26625	9.7	A	65.2	A	9.9	A	putative protein homeotic protein boi1AP3, Brassica oleracea, EMBL:U67453
246835_at	246835_at	At5g26635	80.5	A	217.5	P	141.5	A	putative protein putative APC11 anaphase-promoting complex subunit, Drosophila melanogaster, EMBL:DME251510
246836_s_at	246836_s_at	At5g26645	57.4	A	34.8	A	11.7	A	putative protein MADS box protein AGL29, Arabidopsis thaliana, PIR:T02331
246837_at	246837_at	At5g26665	56.6	A	4.9	A	5.9	A	pectin acetylesterase precursor - like protein pectinacetylesterase precursor, Vigna radiata, PIR:S68805
246838_at	246838_at	At5g26675	440.8	P	382.1	P	351.7	P	flap endonuclease - like protein OsFEN-1, Oryza sativa, EMBL:AB021666
246839_at	246839_at	At5g26718	1967.7	P	2671.9	P	2347.7	P	putative protein
246840_at	246840_at	At5g26605	418	P	341	P	352.5	P	putative protein ;supported by full-length cDNA: Ceres:108509.
246841_at	246841_at	At5g26696	72225.4	P	83039.3	P	77152.6	P	nectarin - like protein nectarin I precursor, Nicotiana plumbaginifolia, EMBL:AF132671; supported by full-length cDNA: Ceres: 14379.
246842_at	246842_at	At5g26731	53.8	A	67.1	A	6	A	Expressed protein ; supported by full-length cDNA: Ceres: 30174.
246843_at	246843_at	At5g26734	3329.1	P	2884.2	P	3015.4	P	putative protein various predicted proteins, Arabidopsis thaliana, Caenorhabditis elegans and Drosophila melanogaster; supported by cDNA: gi_15292726_gb_AY050797.1_
246844_at	246844_at	At5g26655	61.3	A	44.1	A	90.2	A	transcription factor ATMYB4 ; supported by cDNA: gi_2280529_dbj_AB005889.1_AB005889
246845_at	246845_at	At5g26707	449.1	P	498.6	P	423.3	P	glutamyl-tRNA synthetase ; supported by cDNA: gi_3435195_gb_AF067773.1_AF067773
246846_at	246846_at	At5g26760	473.1	P	307.1	A	329.4	A	putative protein
246847_at	246847_at	At5g26820	1343.4	P	2449.2	P	2346.7	P	putative protein ferroportin1, Mus musculus, EMBL:AF226613
246848_at	246848_at	At5g26840	9.5	A	23.1	A	6.6	A	putative protein
246849_at	246849_at	At5g26850	93.2	A	155.2	A	160.7	A	putative protein various predicted proteins, Arabidopsis thaliana, Homo sapiens and Caenorhabdidtis elegans
246850_at	246850_at	At5g26860	112.2	P	238.7	P	115.6	P	Lon protease homolog 2 precursor almost identical to Lon protease homolog 2 mitochondrial precursor SP:P93655, GI:1848290 from [Arabidopsis thaliana]
246851_at	246851_at	At5g26870	2.1	A	28.6	A	3.3	A	putative protein various predicted proteins, Arabidopsis thaliana
246852_at	246852_at	At5g26880	11.1	A	14.7	A	18.8	A	putative protein various predicted bacterial rRNA methylases
246853_at	246853_at	At5g26890	17.6	A	63.2	A	28.1	A	putative protein
246854_at	246854_at	At5g26200	5.5	A	16.4	A	2.5	A	mitochondrial carrier - like protein mitochondrial carrier protein, Ribes nigrum, EMBL:RNI7580;supported by full-length cDNA: Ceres:6836.
246855_at	246855_at	At5g26280	83.4	P	38	A	5	A	putative protein various predicted proteins, Arabidopsis thaliana;supported by full-length cDNA: Ceres:1360.
246856_at	246856_at	At5g26210	179	P	198.4	P	105.1	P	nucleic acid binding protein - like nucleic acid binding protein, Oryza sativa, PIR:T02745;supported by full-length cDNA: Ceres:32443.
246857_at	246857_at	At5g25920	7	A	38.2	A	104.5	P	putative protein
246858_at	246858_at	At5g25930	112.4	P	47.4	A	87.5	P	receptor-like protein kinase - like receptor-like protein kinase 5, Arabidopsis thaliana, PIR:S27756
246859_at	246859_at	At5g25950	7.4	A	9.2	A	13.7	A	putative protein various predicted proteins, Arabidopsis thaliana
246860_at	246860_at	At5g25840	5.5	A	5.7	A	156.1	A	putative protein various predicted proteins, Arabidopsis thaliana;supported by full-length cDNA: Ceres:28528.
246861_at	246861_at	At5g25890	111.2	A	9.7	A	9.4	A	putative protein phytochrome-associated protein 1, Arabidopsis thaliana, EMBL:AF088281;supported by full-length cDNA: Ceres:2499.
246862_at	246862_at	At5g25760	1147.5	P	1115.2	P	1283.2	P	E2, ubiquitin-conjugating enzyme, putative ubiquitin-conjugating enzyme, Pichia pastoris, PIR:A53848; supported by full-length cDNA: Ceres: 102813.
246863_at	246863_at	At5g25940	507	P	494.5	P	530.3	P	nodulin - like protein early nodulin N93, Glycine max, EMBL:D13506;supported by full-length cDNA: Ceres:21669.
246864_at	246864_at	At5g25900	72.1	P	99	P	180.6	P	cytochrome P450 GA3 ; supported by cDNA: gi_3342248_gb_AF047719.1_AF047719
246865_s_at	246865_s_at	At5g25780	292.4	P	342.3	P	224.2	P	eukaryotic translation initiation factor - like protein eukaryotic translation initiation factor 3, Nicotiana tabacum, EMBL:Y11996; supported by cDNA: gi_7689382_gb_AF255680.1_AF255680
246866_at	246866_at	At5g25960	9.3	A	81.6	A	5.9	A	putative protein various predicted proteins, Arabidopsis thaliana
246867_at	246867_at	At5g25990	2.5	A	5	A	3.4	A	putative protein various predicted proteins, Arabidopsis thaliana
246868_at	246868_at	At5g26010	31.6	A	35.1	A	104.8	A	protein phosphatase - like protein phosphatase-2C, Mesembryanthemum crystallinum, AF075579
246869_at	246869_at	At5g26020	4.4	A	62	A	48.1	A	putative protein various predicted proteins, Plasmodium falciparum and Caenorhabditis elegans
246870_at	246870_at	At5g26030	3707.7	P	3837.6	P	3581.5	P	ferrochelatase-I
246871_at	246871_at	At5g26070	3.4	A	102.2	A	12.7	A	extensin - like protein pAP8 protein, Nicotiana tabacum, PIR:S33159
246872_at	246872_at	At5g26080	633.9	P	1586.1	P	1364.1	P	extensin - like protein hydroxyproline-rich glycoprotein precursor, Nicotiana tabacum, PIR:S06733
246873_at	246873_at	At5g26100	10325.1	P	11882.4	P	13891.6	P	putative protein
246874_at	246874_at	At5g26120	98.6	A	34.6	A	12.1	A	arabinosidase - like protein arabinosidase asdI, Bacteroides ovatus, EMBL:BO15178
246875_at	246875_at	At5g26130	15.4	A	60.1	A	48.7	A	pathogenesis-related protein - like pathogenesis-related protein 1 precursor 18.9K, Arabidopsis thaliana, PIR:S71270
246876_at	246876_at	At5g26140	4.7	A	4.3	A	34.9	A	putative protein various predicted lysine decarboxylase proteins, Arabidopsis thaliana
246877_at	246877_at	At5g26150	4790	P	4801.9	P	4298.2	P	putative protein various predicted protein kinases, Arabidopsis thaliana
246878_at	246878_at	At5g26060	22650.5	P	22033.9	P	17865.8	P	putative protein self-incompatibility protein S1 precursor, Papaver rhoeas, PIR:S69186;supported by full-length cDNA: Ceres:23558.
246879_at	246879_at	At5g26110	48.6	A	28.5	A	43.1	A	endopeptidase - like protein O-sialoglycoprotein endopeptidase, Methanococcus jannaschii, pir:A64441;supported by full-length cDNA: Ceres:21854.
246880_s_at	246880_s_at	At5g25980	50	A	105.3	P	69.2	P	myrosinase TGG2 ; supported by cDNA: gi_13507564_gb_AF360348.1_AF360348
246881_at	246881_at	At5g26040	49.4	A	85.1	A	92	A	putative protein histone deacetylase/AcuC/AphA family protein, Deinococcus radiodurans, PIR:H75470; supported by cDNA: gi_16226803_gb_AF428336.1_AF428336
246882_at	246882_at	At5g26180	16.4	A	73.7	A	34.9	A	putative protein predicted proteins, Homo sapiens, Caenorhabditis elegans and Drosophila melanogaster
246883_at	246883_at	At5g26190	132.5	P	94.4	P	70.4	A	putative protein many predicted proteins, Arabidopsis thaliana
246884_at	246884_at	At5g26220	22274.4	P	24140.6	P	21521.6	P	putative protein cation transport protein chaC, Escherichia coli, PIR:G64868
246885_at	246885_at	At5g26230	17.2	A	18.2	A	14.9	A	putative protein predicted protein, Arabidopsis thaliana
246886_at	246886_at	At5g26240	321.9	P	305.5	P	311.4	P	CLC-d chloride channel protein
246887_at	246887_at	At5g26250	6381.2	P	2372.4	P	3875.1	P	hexose transporter - like protein hexose transporter HT2, Lycopersicon esculentum, EMBL:LES132224
246888_at	246888_at	At5g26270	167	P	109.9	P	135.6	P	putative protein
246889_at	246889_at	At5g25470	25.8	A	54.6	A	5.3	A	putative protein various predicted proteins, Arabidopsis thaliana; supported by full-length cDNA: Ceres: 29201.
246890_at	246890_at	At5g25410	61.8	A	67.1	A	13.4	A	Expressed protein ; supported by cDNA: gi_15529243_gb_AY052246.1_
246891_at	246891_at	At5g25490	53.7	A	92.9	A	11.7	A	putative protein various predicted proteins, Oryza sativa and Arabidopsis thaliana
246892_at	246892_at	At5g25500	40.3	A	74.3	A	31.2	A	putative protein predicted protein, Oryza sativa
246893_at	246893_at	At5g25520	479.6	P	430.7	P	337.9	P	PHD finger protein - like PHD finger protein 3, Homo sapiens, EMBL:AF091622
246894_at	246894_at	At5g25530	3453.2	P	3230.5	P	3096.3	P	heat-shock protein - like heat-shock protein hsp40, Homo sapiens, PIR:JN0912
246895_at	246895_at	At5g25540	7797.9	P	7078.5	P	6978.1	P	putative protein predicted protein, Arabidopsis thaliana
246896_at	246896_at	At5g25550	138.4	A	20.5	A	113.6	A	extensin - like protein Pex1 extensin-like protein, Lycopersicon esculentum, EMBL:AF159296
246897_at	246897_at	At5g25560	1751.3	P	1555.7	P	1420.8	P	putative protein predicted proteins, Arabidopsis thaliana and Drosophila melanogaster
246898_at	246898_at	At5g25580	724.6	P	490.5	P	549	P	putative protein
246899_at	246899_at	At5g25590	708.6	P	576.4	P	642.9	P	putative protein various predicted proteins, Arabidopsis thaliana
[truncated: 20,811 more rows]
