# Supplementary material for: Penetration of the Stigma and Style Elicits a Novel Transcriptome in Pollen Tubes, Pointing to Genes Critical for Growth in a Pistil
Source: PLoS Genet. 2009 Aug 28;5(8):e1000621. doi: 10.1371/journal.pgen.1000621 (PMC2726614; doi:10.1371/journal.pgen.1000621)
Supplement: Table S8 — SIV PT-enriched genes (0.51 MB XLS) [file pgen.1000621.s013.xls]

## Sheet: SIV PT-enriched
ID	Symbol	Description	Genbank	flag	average signal_ dry pollen (log2)	average signal_0.5h PT (log2)	average signal_4h PT (log2)	average signal_SIV PT (log2)	average signal_7 day root (log2)	average signal_17 day root (log2)	average signal_8 day seedling (log2)	average signal_21 d seedling (log2)	average signal_rosette leaves (log2)	average signal_ovary_no pollen (log2)	average signal_stigma_no pollen (log2)	Present in Sperm (Borges et al., 2008)
266562_at		defense-related protein, putative; similar to glutamine amidotransferase class-I domain-containing protein [Arabidopsis thaliana] (TAIR:AT4G30550.1); similar to defense-related protein [Brassica carinata] (GB:AAK50344.1); contains InterPro domain Glutamine amidotransferase class-I; (InterPro:IPR000991); contains InterPro domain Glutamine amidotransferase superfamily; (InterPro:IPR011702)	AT2G23970		4.8865	5.48075	6.614	11.08	4.367	4.392	4.393	4.41667	4.316	4.77875	4.56333
264648_at		luminal binding protein 3 (BiP-3) (BP3); similar to BIP (LUMINAL BINDING PROTEIN), ATP binding [Arabidopsis thaliana] (TAIR:AT5G42020.1); similar to luminal binding protein 1 (BiP-1) (BP1) [Arabidopsis thaliana] (TAIR:AT5G28540.1); similar to HSP70B (heat shock protein 70B), ATP binding [Arabidopsis thaliana] (TAIR:AT1G16030.1); similar to luminal binding protein [Pseudotsuga menziesii] (GB:CAA89…	AT1G09080		3.74625	3.981	3.6745	10.6767	3.179	3.141	3.28933	3.274	3.44933	3.331	3.33667
261545_at		similar to hydroxyproline-rich glycoprotein family protein [Arabidopsis thaliana] (TAIR:AT1G63540.1); similar to Leishmania major strain Friedlin proteophosphoglycan 5 [Leishmania major strain Friedlin] (GB:XP_843163.1)	AT1G63530		5.26025	4.81225	5.76475	10.54	5.24233	5.45867	5.149	5.02467	4.81767	4.51475	4.51
251398_at		zinc finger (C2H2 type) family protein; similar to zinc finger (C2H2 type) family protein [Arabidopsis thaliana] (TAIR:AT2G45120.1); similar to ZPT3-3 [Petunia x hybrida] (GB:BAA21927.1); contains InterPro domain Zinc finger, C2H2-type; (InterPro:IPR007087)	AT3G60580		5.692	5.8725	6.228	10.15	4.21333	4.122	4.20433	4.26433	4.342	4.763	5.418
262167_at		zinc finger (C3HC4-type RING finger) family protein; similar to zinc finger (C3HC4-type RING finger) family protein [Arabidopsis thaliana] (TAIR:AT1G19310.1); similar to Os12g0636000 [Oryza sativa (japonica cultivar-group)] (GB:NP_001067361.1); similar to Os01g0766200 [Oryza sativa (japonica cultivar-group)] (GB:NP_001044354.1); similar to putative RING finger protein [Oryza sativa (japonica cult…	AT1G74990		5.77625	5.88025	6.1845	10.09	4.958	4.94767	5.072	5.11767	5.203	5.30125	5.52433	yes
254683_at		permease-related; similar to permease-related [Arabidopsis thaliana] (TAIR:AT3G23870.1); similar to OSJNBa0069D17.4 [Oryza sativa (japonica cultivar-group)] (GB:CAD40575.1); similar to Os05g0424800 [Oryza sativa (japonica cultivar-group)] (GB:NP_001055595.1); similar to Protein of unknown function DUF803 [Medicago truncatula] (GB:ABE89975.1); contains InterPro domain Protein of unknown function D…	AT4G13800		5.82	5.82325	6.5755	9.884	4.95733	4.80567	5.22667	5.40067	5.46967	5.23325	5.52067
259852_at	AERO1	endoplasmic reticulum oxidoreductin	AT1G72280		5.93575	5.8505	6.1815	9.797	5.45633	4.90533	5.59567	5.30367	5.241	5.293	5.90533	yes
246887_at		sugar transporter, putative; Identical to Sugar transport protein 8 (Hexose transporter 8) (STP8) [Arabidopsis Thaliana] (GB:Q9SBA7;GB:O81492); similar to sugar transporter, putative [Arabidopsis thaliana] (TAIR:AT3G05960.1); similar to monosaccharide transporter [Populus tremula x Populus tremuloides] (GB:CAG27608.1); contains InterPro domain Sugar transporter; (InterPro:IPR003663); contains Int…	AT5G26250		5.517	5.4625	5.91175	9.60367	4.56833	4.46067	4.483	4.543	4.697	4.9115	4.40833
259923_at		protein kinase family protein; similar to kinase [Arabidopsis thaliana] (TAIR:AT1G17540.1); similar to High mobility group protein HMG14 and HMG17; Protein kinase [Medicago truncatula] (GB:ABE79015.1); contains InterPro domain Protein kinase-like; (InterPro:IPR011009); contains InterPro domain Protein kinase; (InterPro:IPR000719); contains InterPro domain Serine/threonine protein kinase, active s…	AT1G72760		4.6975	4.512	5.20825	9.58533	3.37367	3.523	3.74467	3.72133	3.66033	3.847	4.135
256911_at		transaminase; similar to Glucosamine 6-phosphate synthetases, contain amidotransferase and phosphosugar isomerase domains (ISS) [Ostreococcus tauri] (GB:CAL54169.1); similar to glucosamine-fructose-6-phosphate aminotransferase, isomerizing family protein, expressed [Oryza sativa (japonica cultivar-group)] (GB:ABA91394.2); similar to SIS domain containing protein, expressed [Oryza sativa (japonica…	AT3G24090		5.75375	5.80525	5.8165	9.55867	6.40733	6.033	5.067	4.62533	5.344	5.684	5.18233
258907_at	AT3G06370.1, NHX4	member of Sodium proton exchanger family, member of Sodium proton exchanger family	AT3G06370		5.5225	5.80925	6.39375	9.53333	6.54367	5.76033	5.32967	5.311	5.267	4.99425	5.03967
259539_at		similar to unknown protein [Arabidopsis thaliana] (TAIR:AT1G76270.1); similar to axi 1 [Nicotiana tabacum] (GB:CAA56570.1); contains InterPro domain Protein of unknown function DUF246, plant; (InterPro:IPR004348)	AT1G20550		5.251	5.2585	6.35175	9.49033	5.131	5.13333	4.575	4.556	4.60267	5.55475	5.17533	yes
261883_at		protein kinase family protein; similar to protein kinase family protein [Arabidopsis thaliana] (TAIR:AT2G45590.1); similar to Os03g0251700 [Oryza sativa (japonica cultivar-group)] (GB:NP_001049573.1); similar to Protein kinase domain containing protein, expressed [Oryza sativa (japonica cultivar-group)] (GB:ABF94994.1); contains InterPro domain Protein kinase-like; (InterPro:IPR011009); contains …	AT1G80870		5.963	6.14875	6.286	9.38133	6.266	5.95933	5.19233	5.45867	5.95367	6.04875	5.76467
266161_at	AT2G28170.1, ATCHX7	member of Putative Na+/H+ antiporter family, member of Putative Na+/H+ antiporter family	AT2G28170		4.156	4.56975	5.0045	9.24633	3.47767	3.46567	3.652	3.56	3.65267	3.79175	3.84433
246336_at	ATCHX4	member of Putative Na+/H+ antiporter family	AT3G44900		4.4405	4.53175	6.43725	9.24333	3.54867	3.44733	3.572	3.785	3.834	4.01025	4.094
258719_at		pectate lyase family protein; similar to pectate lyase family protein [Arabidopsis thaliana] (TAIR:AT3G55140.1); similar to Os01g0546800 [Oryza sativa (japonica cultivar-group)] (GB:NP_001043284.1); similar to putative pectate lyase [Oryza sativa (japonica cultivar-group)] (GB:BAD73403.1); contains InterPro domain Virulence factor, pectin lyase fold; (InterPro:IPR011050); contains InterPro domain…	AT3G09540		4.6045	4.58	6.51825	9.228	5.934	5.746	4.80467	4.838	5.99767	4.87575	4.76733
266568_at		similar to unknown protein [Arabidopsis thaliana] (TAIR:AT4G30710.1); similar to Protein of unknown function DUF566 [Medicago truncatula] (GB:ABE79495.1); contains InterPro domain Protein of unknown function DUF566; (InterPro:IPR007573)	AT2G24070		4.64	4.95575	5.3185	9.13333	5.053	4.96267	4.261	4.29767	4.509	4.567	4.93267
266381_at	AT2G14670.1	ATSUC8 (SUCROSE-PROTON SYMPORTER 8); carbohydrate transporter/ sucrose:hydrogen symporter/ sugar porter; Identical to Sucrose transport protein SUC8 (Sucrose permease 8) (Sucrose-proton symporter 8) (SUC8) [Arabidopsis Thaliana] (GB:Q9ZVK6); similar to ATSUC9 (SUCROSE-PROTON SYMPORTER 9), carbohydrate transporter/ sucrose:hydrogen symporter/ sugar porter [Arabidopsis thaliana] (TAIR:AT5G06170.1);…	AT2G14670		4.86775	5.00775	5.35825	9.11733	4.837	4.63667	4.698	4.687	4.76233	4.90875	4.921
246839_at		similar to unknown protein [Arabidopsis thaliana] (TAIR:AT3G05935.1); similar to hypothetical protein MtrDRAFT_AC149038g24v1 [Medicago truncatula] (GB:ABD32861.1)	AT5G26720		4.6195	5.2335	6.345	9.107	4.67533	4.65867	4.842	4.90667	4.71033	4.6425	4.871	yes
252435_at		Mutator-like transposase family, has a 6.7e-76 P-value blast match to Q9SI25 /181-349 Pfam PF03108 MuDR family transposase (MuDr-element domain), similar to unknown protein [Arabidopsis thaliana] (TAIR:AT5G37385.1), Mutator-like transposase family, has a 2.2e-75 P-value blast match to Q9SI25 /181-349 Pfam PF03108 MuDR family transposase (MuDr-element domain), Mutator-like transposase family, has …	multiple		5.6815	5.916	5.51575	9.09	3.091	3.086	3.06667	2.95633	3.008	3.1365	3.16633
263003_at		calcium-binding EF-hand family protein; similar to calcium-binding EF hand family protein [Arabidopsis thaliana] (TAIR:AT5G28900.1); similar to calcium-binding EF hand family protein, putative / protein phosphatase 2A 62 kDa B'' regulatory subunit, putative [Arabidopsis thaliana] (TAIR:AT5G44090.1); similar to calcium-binding EF hand family protein [Arabidopsis thaliana] (TAIR:AT5G28850.2); simil…	AT1G54450		5.207	5.279	5.88725	9.04133	4.28	4.33833	3.929	4.18867	4.44067	4.32225	4.99133
249883_at	AT5G22900.1, ATCHX3	member of Putative Na+/H+ antiporter family, member of Putative Na+/H+ antiporter family	AT5G22900		3.3195	3.46975	5.427	9.00833	3.107	3.10167	3.101	3.06033	3.16267	3.21325	3.255
259435_at		Potential natural antisense gene, locus overlaps with AT1G01450, protein kinase-related; similar to kinase [Arabidopsis thaliana] (TAIR:AT1G64300.2); similar to Os05g0585800 [Oryza sativa (japonica cultivar-group)] (GB:NP_001056458.1); similar to photoreceptor [Ceratodon purpureus] (GB:CAA71838.1); similar to Os01g0621600 [Oryza sativa (japonica cultivar-group)] (GB:NP_001043605.1); contains Inte…	multiple		5.0325	4.97025	6.41275	8.969	4.26367	4.22533	4.39367	4.356	4.48833	4.57275	4.72267
262307_at		DNAJ heat shock N-terminal domain-containing protein; similar to DNAJ heat shock N-terminal domain-containing protein [Arabidopsis thaliana] (TAIR:AT1G56300.1); similar to DnaJ-like protein [Glycine max] (GB:AAM23263.1); contains InterPro domain Heat shock protein DnaJ, N-terminal; (InterPro:IPR001623)	AT1G71000		4.28475	4.3465	5.27275	8.95933	3.783	4.229	3.912	3.93067	4.00267	3.98225	5.09233	yes
247064_at		disease resistance protein (CC-NBS-LRR class), putative; Identical to Probable disease resistance protein At5g66890 [Arabidopsis Thaliana] (GB:Q9FKZ2); similar to disease resistance protein (CC-NBS-LRR class), putative [Arabidopsis thaliana] (TAIR:AT5G66900.1); similar to Disease resistance protein; AAA ATPase [Medicago truncatula] (GB:ABE88570.1); contains InterPro domain Leucine-rich repeat; (I…	AT5G66890		4.605	4.474	5.437	8.89867	3.773	3.75633	3.755	3.90033	3.982	3.7385	3.98867	yes
253154_at		similar to unknown protein [Arabidopsis thaliana] (TAIR:AT4G35690.1); similar to hypothetical protein [Glycine max] (GB:AAK01735.1); contains InterPro domain Protein of unknown function DUF241, plant; (InterPro:IPR004320)	AT4G35710		4.8985	5.204	5.419	8.892	4.01267	4.09033	4.01267	3.97767	4.13933	3.826	3.98867	yes
258752_at	AT3G09520.1	A member of EXO70 gene family, putative exocyst subunits, conserved in land plants. Arabidopsis thaliana contains 23 putative EXO70 genes, which can be classified into eight clusters on the phylogenetic tree.	AT3G09520		6.027	6.41375	6.2485	8.821	4.354	4.29	5.40767	4.98533	5.444	4.5815	4.74567	yes
265174_s_at		polygalacturonase; similar to polygalacturonase, putative / pectinase, putative [Arabidopsis thaliana] (TAIR:AT1G70500.1); similar to polygalacturonase [Cucumis sativus] (GB:BAA88472.1); contains InterPro domain Virulence factor, pectin lyase fold; (InterPro:IPR011050); contains InterPro domain Glycoside hydrolase, family 28; (InterPro:IPR000743); contains InterPro domain Pectolytic enzyme, Pecti…	multiple		3.54025	3.58925	3.8075	8.80233	5.237	5.08067	4.33767	4.371	5.04933	4.4765	5.16767
249565_at		self-incompatibility protein-related; similar to self-incompatibility protein-related [Arabidopsis thaliana] (TAIR:AT5G04350.1); contains InterPro domain Plant self-incompatibility S1; (InterPro:IPR010264)	AT5G38440		3.94925	4.301	5.30825	8.74167	3.25767	3.185	3.24067	3.21167	3.29533	3.38325	3.19467
263614_at		serpin, putative / serine protease inhibitor, putative; similar to serpin, putative / serine protease inhibitor, putative [Arabidopsis thaliana] (TAIR:AT2G26390.1); similar to serpin-like protein [Citrus x paradisi] (GB:AAN76362.1); contains InterPro domain Proteinase inhibitor I4, serpin; (InterPro:IPR000215)	AT2G25240		4.59175	4.9855	4.775	8.74133	4.69233	4.26867	4.19033	4.046	4.015	4.06775	4.458
260805_at	AT1G78320.1, ATGSTU23	Encodes glutathione transferase belonging to the tau class of GSTs. Naming convention according to Wagner et al. (2002)., Encodes glutathione transferase belonging to the tau class of GSTs. Naming convention according to Wagner et al. (2002).	AT1G78320		5.087	5.3685	6.50075	8.68467	6.38267	5.81767	4.56633	4.751	4.85433	4.7125	4.528
246705_x_at		similar to unknown protein [Arabidopsis thaliana] (TAIR:AT5G28120.1), similar to unknown protein [Arabidopsis thaliana] (TAIR:AT5G28110.1)	multiple		5.44	5.45875	6.0635	8.68367	3.576	3.51667	3.65333	3.54567	3.66233	3.915	3.98767	yes
254733_at		glycoside hydrolase family 28 protein / polygalacturonase (pectinase) family protein; similar to glycoside hydrolase family 28 protein / polygalacturonase (pectinase) family protein [Arabidopsis thaliana] (TAIR:AT2G15450.1); similar to glycoside hydrolase family 28 protein / polygalacturonase (pectinase) family protein [Arabidopsis thaliana] (TAIR:AT2G15470.1); similar to glycoside hydrolase fami…	AT4G13760		3.3465	3.74075	4.97925	8.67633	3.17	3.14267	3.24567	3.15	3.18867	3.14075	3.235
246607_at		carbohydrate binding / kinase; similar to lectin protein kinase family protein [Arabidopsis thaliana] (TAIR:AT4G32300.1); similar to Os02g0767400 [Oryza sativa (japonica cultivar-group)] (GB:NP_001048231.1); similar to D-mannose binding lectin family protein, expressed [Oryza sativa (japonica cultivar-group)] (GB:ABA99625.1); similar to Os09g0454900 [Oryza sativa (japonica cultivar-group)] (GB:NP…	AT5G35370		5.484	5.5695	5.61725	8.66267	6.22567	6.33567	6.63967	6.40233	4.99867	4.916	5.85633
257483_at	AT1G49620.1, ICK5	Kip-related protein (KRP) gene, encodes CDK (cyclin-dependent kinase) inhibitor (CKI), negative regulator of cell division. A member of seven KRP genes found in Arabidopsis thaliana. Differential expression patterns for distinct KRPs were revealed by in situ hybridization. Binds to D type cyclins and may inhibit cell cycle., Kip-related protein (KRP) gene, encodes CDK (cyclin-dependent kinase) in…	AT1G49620		6.355	6.3865	6.52825	8.65833	5.78333	5.712	5.67033	5.72233	6.07167	5.9215	5.98667
245604_at		similar to unknown protein [Arabidopsis thaliana] (TAIR:AT3G23540.1); similar to expressed protein [Oryza sativa (japonica cultivar-group)] (GB:ABF96061.1); contains InterPro domain Esterase/lipase/thioesterase; (InterPro:IPR000379); contains InterPro domain Alpha/beta hydrolase fold-1; (InterPro:IPR000073)	AT4G14290		4.15325	4.3085	5.59375	8.61333	4.64833	4.857	3.799	3.78133	3.80933	4.59975	4.388
247514_at	PMSR1	ubiquitous enzyme that repairs oxidatively damaged proteins	AT5G61640		6.51375	6.37225	6.36625	8.60233	5.344	5.65467	6.02233	6.594	5.13567	5.695	5.72233	yes
251061_at		armadillo/beta-catenin repeat family protein / U-box domain-containing protein; similar to PUB17 (PLANT U-BOX17), ubiquitin-protein ligase [Arabidopsis thaliana] (TAIR:AT1G29340.1); similar to arm repeat protein [Oryza sativa (japonica cultivar-group)] (GB:AAO72657.1); contains InterPro domain Armadillo; (InterPro:IPR000225); contains InterPro domain Armadillo-like helical; (InterPro:IPR011989); …	AT5G01830		5.9975	6.1025	6.039	8.59333	6.01467	5.89533	5.965	5.16367	4.27833	4.35	4.38533
256407_at	AT1G66570.1, AT1G66570.1	ATSUC7 (SUCROSE-PROTON SYMPORTER 7); carbohydrate transporter/ sucrose:hydrogen symporter/ sugar porter; Identical to Probable sucrose transport protein SUC7 (Sucrose permease 7) (Sucrose- proton symporter 7) (SUC7) [Arabidopsis Thaliana] (GB:Q67YF8;GB:Q9C6H8;GB:Q9C716); similar to ATSUC9 (SUCROSE-PROTON SYMPORTER 9), carbohydrate transporter/ sucrose:hydrogen symporter/ sugar porter [Arabidopsis…	AT1G66570		4.213	4.419	5.04	8.48	3.42833	3.45833	3.518	3.51567	3.57867	3.66325	3.66667
255883_at		oxidoreductase, 2OG-Fe(II) oxygenase family protein; similar to oxidoreductase, 2OG-Fe(II) oxygenase family protein [Arabidopsis thaliana] (TAIR:AT2G17720.1); similar to putative prolyl 4-hydroxylase [Oryza sativa (japonica cultivar-group)] (GB:BAD23054.1); contains InterPro domain Prolyl 4-hydroxylase, alpha subunit; (InterPro:IPR006620); contains InterPro domain 2OG-Fe(II) oxygenase; (InterPro:…	AT1G20270		5.298	5.107	5.6645	8.433	5.80133	5.63333	5.05667	5.219	5.14533	5.291	5.56633
261430_at		transducin family protein / WD-40 repeat family protein; similar to EMB2221 (EMBRYO DEFECTIVE 2221) [Arabidopsis thaliana] (TAIR:AT3G63460.1); similar to Sec31p [Oryza sativa] (GB:BAB47154.1); similar to Os07g0657200 [Oryza sativa (japonica cultivar-group)] (GB:NP_001060510.1); contains InterPro domain WD-40 repeat; (InterPro:IPR001680); contains InterPro domain WD40-like; (InterPro:IPR011046)	AT1G18830		4.78225	5.12975	4.912	8.41467	3.78233	3.74267	3.868	3.747	3.84733	3.96275	4.22667
251952_at		histone H2B, putative; Identical to Putative histone H2B.8 (HTB6) [Arabidopsis Thaliana] (GB:Q9LFF6); similar to histone H2B, putative [Arabidopsis thaliana] (TAIR:AT2G37470.1); similar to Probable histone H2B.3 (GB:Q1SU99); contains InterPro domain Histone-fold; (InterPro:IPR009072); contains InterPro domain Histone core; (InterPro:IPR007125); contains InterPro domain Histone-fold/TFIID-TAF/NF-Y…	AT3G53650		4.873	5.35575	6.47375	8.40933	5.856	5.14667	3.82333	3.44167	4.556	4.0405	3.84167	yes
258138_at	AT3G24495.1, MSH7	encodes a DNA mismatch repair homolog of human MutS gene, MSH6. There are four MutS genes in Arabidopsis, MSH2, MSH3, MSH6, and MSH7, which all act as heterodimers and bind to 51-mer duplexes. MSH2*MSH7 exhibit moderate affinity for a (T/G) substrate and weak binding of (+T), suggesting MSH2*MSH7 may be specialized for lesions/base mispairs not tested or for (T/G) mispairs in special contexts., e…	AT3G24495		5.44625	5.362	5.9815	8.39467	6.62067	6.30367	4.90067	4.73833	6.022	6.4745	5.69233
257447_at		F-box family protein; similar to F-box family protein [Arabidopsis thaliana] (TAIR:AT3G49030.1); similar to Cyclin-like F-box; FBD [Medicago truncatula] (GB:ABE92019.1); contains InterPro domain FBD-like; (InterPro:IPR006566); contains InterPro domain Cyclin-like F-box; (InterPro:IPR001810); contains InterPro domain FBD; (InterPro:IPR013596); contains InterPro domain Leucine-rich repeat 2; (Inter…	AT2G04230		5.14125	4.886	5.1585	8.388	4.40333	4.38933	5.81467	5.60833	5.76667	5.7875	5.82533
264214_s_at	AT1G65300.1, PHE2, AT1G65300.1, PHE2, PHE1	PHE2 (PHERES2); DNA binding / transcription factor; Identical to MADS-box transcription factor PHERES2 (PHE2) [Arabidopsis Thaliana] (GB:Q7XJK8;GB:O80802); similar to PHE1 (PHERES1), DNA binding / transcription factor [Arabidopsis thaliana] (TAIR:AT1G65330.1); similar to putative MADS-box protein AGL35 [Oryza sativa (japonica cultivar-group)] (GB:BAD81343.1); contains InterPro domain Transcriptio…	multiple		6.147	5.7885	6.3535	8.38733	4.845	4.55	4.54467	4.664	4.48367	4.68325	5.39233
254015_at	AT4G26140.1, BGAL12	putative beta-galactosidase, putative beta-galactosidase	AT4G26140		4.648	4.583	4.75325	8.38433	5.22267	5.103	4.54667	4.828	4.49933	4.26325	4.47133
247456_at	AT5G62160.1, ZIP12	member of Fe(II) transporter isolog family, member of Fe(II) transporter isolog family	AT5G62160		5.6015	5.7535	5.70075	8.38	4.99567	4.89533	5.12867	5.07733	5.223	5.4125	5.489
263169_at		phototropic-responsive NPH3 family protein; similar to phototropic-responsive NPH3 family protein [Arabidopsis thaliana] (TAIR:AT2G47860.1); similar to Os03g0347700 [Oryza sativa (japonica cultivar-group)] (GB:NP_001050100.1); similar to transposon protein, putative, Mutator sub-class, expressed [Oryza sativa (japonica cultivar-group)] (GB:ABA91176.1); contains InterPro domain NPH3; (InterPro:IPR…	AT1G03010		4.0185	4.00975	3.96975	8.35333	4.96567	5.72767	3.63767	3.69933	4.03667	4.37025	4.15133
266637_at	AT2G35600.1, BRXL1	Belongs to five-member BRX gene family. Arabidopsis BRX genes share high levels of similarity among each others, with several conserved domains. The most distinct is BRX domain - highly conserved in all BRX genes among distantly related species. This protein-protein interaction domain is required and sufficient for BRX activity., Belongs to five-member BRX gene family. Arabidopsis BRX genes share…	AT2G35600		6.51275	6.53625	6.559	8.349	4.51867	4.43933	4.44433	4.508	4.389	4.45275	4.466	yes
254749_at		DC1 domain-containing protein; similar to DC1 domain-containing protein [Arabidopsis thaliana] (TAIR:AT1G62030.1); similar to DC1 domain-containing protein [Arabidopsis thaliana] (TAIR:AT4G02540.1); similar to DC1 domain-containing protein [Arabidopsis thaliana] (TAIR:AT5G48320.1); similar to DC1 domain-containing protein [Brassica oleracea] (GB:ABD65623.1); contains InterPro domain Zinc finger, …	AT4G13130		5.39325	5.6885	5.82825	8.33667	6.538	6.37767	4.784	4.85767	4.873	4.69575	5.21433
251909_at	TRFL4	Arabidopsis thaliana telomere-binding protein, putative (At3g53790)	AT3G53790		6.636	6.31325	6.58175	8.33367	4.46367	4.65067	4.65433	4.534	4.64833	4.6955	4.74733
257768_at		zinc finger (C3HC4-type RING finger) family protein; similar to zinc finger (C3HC4-type RING finger) family protein [Arabidopsis thaliana] (TAIR:AT1G06770.1); similar to zinc finger (C3HC4-type RING finger) family protein [Arabidopsis thaliana] (TAIR:AT2G30580.1); similar to Zinc finger, C3HC4 type family protein, expressed [Oryza sativa (japonica cultivar-group)] (GB:ABF97766.1); contains InterP…	AT3G23060		5.98825	5.87	5.9655	8.31467	4.63633	4.66633	4.65067	4.62133	4.70633	4.86625	5.081
263087_s_at		mannitol transporter, putative; Identical to Putative polyol transporter 1 (PLT1) [Arabidopsis Thaliana] (GB:Q9XIH7); similar to ATPLT5 (POLYOL TRANSPORTER 5), D-ribose transporter/ D-xylose transporter/ carbohydrate transporter/ galactose transporter/ glucose transporter/ glycerol transporter/ hydrogen:sugar symporter/ mannitol transporter/ monosaccharide transporter/ myo-inositol transporter/ s…	multiple		6.629	6.57075	6.63225	8.29667	4.96167	4.88033	4.79533	5.102	5.162	5.11675	5.12633
259520_at		similar to unknown protein [Arabidopsis thaliana] (TAIR:AT1G62840.1); similar to Os02g0455400 [Oryza sativa (japonica cultivar-group)] (GB:NP_001046773.1); similar to unknown protein [Oryza sativa (japonica cultivar-group)] (GB:BAD19988.1); contains InterPro domain Protein of unknown function DUF1442; (InterPro:IPR009902)	AT1G12320		4.6225	4.3645	6.52325	8.26767	4.19067	4.58867	5.13233	5.06667	5.87367	6.56275	4.70667
251752_at	ProT2	Encodes a proline transporter with affinity for gly betaine, proline, and GABA. Protein is expressed most highly in the roots.	AT3G55740		5.203	4.73275	4.93775	8.259	5.783	5.25067	5.60267	5.38333	5.53833	5.3925	6.474
245648_at		similar to unknown protein [Arabidopsis thaliana] (TAIR:AT1G35100.1)	AT1G24938		5.1885	5.625	6.309	8.24033	3.966	3.88833	3.90433	3.81633	4.091	4.23775	4.28233
261097_at		leucine-rich repeat transmembrane protein kinase, putative; similar to leucine-rich repeat transmembrane protein kinase, putative [Arabidopsis thaliana] (TAIR:AT1G12460.1); similar to putative receptor-like protein kinase [Oryza sativa (japonica cultivar-group)] (GB:AAM88626.1); similar to Os03g0127700 [Oryza sativa (japonica cultivar-group)] (GB:NP_001048834.1); contains InterPro domain Protein …	AT1G62950		6.4295	6.3005	6.53925	8.21433	4.93167	5.02567	4.97467	4.95967	4.9	5.3755	5.415	yes
256513_at	SGR2	encodes a novel protein that may be part of a gene family represented by bovine phosphatidic acid-preferring phospholipase A1 (PA-PLA1)containing a putative transmembrane domain. SGR2 is involved in the formation and function of the vacuole.	AT1G31480		4.8225	5.566	5.69475	8.19067	5.953	6.105	6.069	6.39433	5.72633	5.73	6.02833
246872_at		proline-rich family protein; similar to proline-rich family protein [Arabidopsis thaliana] (TAIR:AT3G20850.1); similar to Extensin precursor (Cell wall hydroxyproline-rich glycoprotein) (GB:P13983); contains InterPro domain Pistil-specific extensin-like protein; (InterPro:IPR003882); contains InterPro domain Glutelin; (InterPro:IPR000480)	AT5G26080		5.29925	5.3855	5.25775	8.19	3.949	3.644	4.08567	4.06167	4.01367	4.266	4.742
261003_at		pentatricopeptide (PPR) repeat-containing protein; similar to pentatricopeptide (PPR) repeat-containing protein [Arabidopsis thaliana] (TAIR:AT3G62470.1); similar to putative disease resistance protein RPH8A [Oryza sativa (japonica cultivar-group)] (GB:BAC15497.1); similar to Os07g0599100 [Oryza sativa (japonica cultivar-group)] (GB:NP_001060187.1); contains InterPro domain Pentatricopeptide repe…	AT1G26500		5.2125	5.50075	5.696	8.13633	4.065	4.07233	4.44033	4.37467	4.63167	4.6245	4.417
262741_at		similar to unknown protein [Arabidopsis thaliana] (TAIR:AT5G67610.2); similar to expressed protein [Oryza sativa (japonica cultivar-group)] (GB:ABF97955.1); similar to Os03g0654500 [Oryza sativa (japonica cultivar-group)] (GB:NP_001050797.1)	AT1G28760		5.4165	5.57325	5.8685	8.13167	6.10133	5.99167	5.96067	5.975	5.793	6.50025	6.26933
264888_at		similar to unknown protein [Arabidopsis thaliana] (TAIR:AT4G38360.2); similar to hypothetical protein [Oryza sativa (japonica cultivar-group)] (GB:AAU89247.1); contains InterPro domain Protein of unknown function DUF300; (InterPro:IPR005178)	AT1G23070		5.00625	5.064	4.67375	8.125	3.93	3.97067	3.91233	4.035	4.119	4.0515	4.03
249547_at		protease inhibitor/seed storage/lipid transfer protein (LTP) family protein; similar to protease inhibitor/seed storage/lipid transfer protein (LTP) family protein [Arabidopsis thaliana] (TAIR:AT5G38170.1); similar to lipid transfer-like protein [Brassica napus var. napus] (GB:AAS68185.1); similar to seed specific protein Bn15D80B [Brassica napus] (GB:AAP37973.1); contains InterPro domain Plant l…	AT5G38160		5.56	5.29875	5.43	8.11933	4.536	4.37967	4.65667	4.60767	4.692	4.68825	4.771
265373_at		replication protein, putative; similar to replication protein, putative [Arabidopsis thaliana] (TAIR:AT5G45400.1); similar to Os02g0776800 [Oryza sativa (japonica cultivar-group)] (GB:NP_001048287.1); similar to replication protein A 70kDa [Oryza sativa (japonica cultivar-group)] (GB:BAB40712.1); similar to RPA 70kDa subunit [Pisum sativum] (GB:AAQ23194.1); contains InterPro domain Nucleic acid-b…	AT2G06510		6.406	6.48825	6.14425	8.10633	5.62	5.32533	5.2	5.085	4.87033	6.243	5.64633	yes
254731_at	AT4G13740.1	EMB2597 (EMBRYO DEFECTIVE 2597); similar to unknown protein [Arabidopsis thaliana] (TAIR:AT1G08300.1); similar to conserved hypothetical protein [Medicago truncatula] (GB:ABE91506.1)	AT4G13740		6.13575	6.01775	5.7865	8.09933	4.706	4.63267	4.542	4.726	4.79333	4.5205	4.478	yes
250588_at		structural maintenance of chromosomes (SMC) family protein; similar to MIM (HYPERSENSITIVE TO MMS, IRRADIATION AND MMC), ATP binding [Arabidopsis thaliana] (TAIR:AT5G61460.1); similar to SMC6 protein [Oryza sativa] (GB:CAD59413.1); contains InterPro domain SMC protein, N-terminal; (InterPro:IPR003395); contains InterPro domain ABC transporter related; (InterPro:IPR003439)	AT5G07660		5.992	6.53475	6.5255	8.08633	4.44567	4.389	4.072	3.948	4.49667	4.99225	4.32	yes
256974_at		copia-like retrotransposon family, has a 4.9e-07 P-value blast match to GB:CAA31653 polyprotein (Ty1_Copia-element) (Arabidopsis thaliana)	AT3G20990		6.1875	6.118	6.638	8.07567	3.35167	3.347	3.41967	3.478	3.42667	3.32975	3.28667	yes
262928_at		F-box family protein; similar to F-box family protein [Arabidopsis thaliana] (TAIR:AT1G65740.1); similar to Cyclin-like F-box [Medicago truncatula] (GB:ABE79226.1); contains InterPro domain Cyclin-like F-box; (InterPro:IPR001810); contains InterPro domain Protein of unknown function DUF295; (InterPro:IPR005174)	AT1G65760		5.66175	6.01225	6.0575	8.029	3.52367	3.40833	3.63667	3.76933	3.7	3.67825	3.80733	yes
266056_at	AT2G40810.1, AtATG18c, AT2G40810.1, AtATG18c	AtATG18c (Arabidopsis thaliana homolog of yeast autophagy 18 (ATG18) c); similar to AtATG18d (Arabidopsis thaliana homolog of yeast autophagy 18 (ATG18) d) [Arabidopsis thaliana] (TAIR:AT3G56440.1); similar to P0028E10.20 [Oryza sativa (japonica cultivar-group)] (GB:BAB39916.1); similar to Os01g0168500 [Oryza sativa (japonica cultivar-group)] (GB:NP_001042130.1); contains InterPro domain WD-40 re…	AT2G40810		4.714	5.2395	5.62125	8.024	5.26333	5.323	6.24067	6.10067	5.57	5.48275	5.67267
260850_at		glucose-6-phosphate/phosphate translocator-related; similar to glucose-6-phosphate/phosphate translocator-related [Arabidopsis thaliana] (TAIR:AT1G77610.1); similar to hypothetical protein DDBDRAFT_0187416 [Dictyostelium discoideum AX4] (GB:XP_637234.1); similar to Os08g0104900 [Oryza sativa (japonica cultivar-group)] (GB:NP_001060782.1); similar to Os04g0692000 [Oryza sativa (japonica cultivar-g…	AT1G21870		5.8855	5.9	6.16425	8.01467	4.947	4.88	4.86067	4.92667	4.93133	5.19675	5.43133	yes
251135_at		similar to proline-rich family protein [Arabidopsis thaliana] (TAIR:AT3G09000.1); similar to Os01g0141900 [Oryza sativa (japonica cultivar-group)] (GB:NP_001041987.1); similar to putative proteophosphoglycan [Oryza sativa (japonica cultivar-group)] (GB:BAD61066.1)	AT5G01280		6.05425	6.159	6.283	8.00533	3.58733	3.51733	3.506	3.43	3.49467	3.549	3.63167	yes
266725_at	AT2G03170.1	ASK14 (ARABIDOPSIS SKP1-LIKE 14); protein binding / ubiquitin-protein ligase; similar to ASK15 (ARABIDOPSIS SKP1-LIKE 15), ubiquitin-protein ligase [Arabidopsis thaliana] (TAIR:AT3G25650.1); similar to kinetochore protein [Brassica juncea] (GB:BAB85606.1); similar to kinetochore protein [Brassica juncea] (GB:BAB85607.1); contains InterPro domain SKP1 component; (InterPro:IPR001232)	AT2G03170		5.9925	6.06475	6.5995	8.00533	3.89133	3.87133	4.323	4.30167	4.32767	4.401	4.465	yes
262385_at		root hair defective 3 GTP-binding (RHD3) family protein; similar to root hair defective 3 GTP-binding (RHD3) family protein [Arabidopsis thaliana] (TAIR:AT5G45160.1); similar to RHD3 (ROOT HAIR DEFECTIVE 3) [Arabidopsis thaliana] (TAIR:AT3G13870.1); similar to root hair defective 3 GTP-binding protein [Triticum aestivum] (GB:AAS67855.2); similar to Os01g0575000 [Oryza sativa (japonica cultivar-gr…	AT1G72960		6.58275	6.36975	6.31825	8.002	4.785	4.46933	4.88367	4.82067	4.92333	4.857	4.77433
264223_s_at	AT3G16030.1	CES101 (CALLUS EXPRESSION OF RBCS 101); carbohydrate binding / kinase; similar to B120, protein kinase/ sugar binding [Arabidopsis thaliana] (TAIR:AT4G21390.1); similar to SFR1 [Brassica oleracea var. acephala] (GB:CAA74661.1); contains InterPro domain Serine/threonine protein kinase; (InterPro:IPR002290); contains InterPro domain Apple-like; (InterPro:IPR003609); contains InterPro domain Curculi…	AT3G16030		3.849	3.9855	3.77625	7.99167	5.13267	4.81833	5.48467	5.49667	3.964	3.66475	3.486
257955_at		zinc finger (CCCH-type) family protein; similar to BRI1-KD interacting protein 105 [Oryza sativa (japonica cultivar-group)] (GB:BAD11333.1); similar to Os02g0161200 [Oryza sativa (japonica cultivar-group)] (GB:NP_001045976.1); contains InterPro domain Zinc finger, CCCH-type; (InterPro:IPR000571)	AT3G21810		5.836	5.82875	5.81875	7.96967	5.78233	5.55367	5.288	5.17933	5.807	5.79025	6.02167
261341_s_at	AT1G52940.1, AT2G18130.1, AT3G46120.1	ATPAP5/PAP5 (purple acid phosphatase 5); acid phosphatase/ protein serine/threonine phosphatase; similar to ATPAP11/PAP11 (purple acid phosphatase 11), acid phosphatase/ protein serine/threonine phosphatase [Arabidopsis thaliana] (TAIR:AT2G18130.1); similar to purple acid phosphatase [Ipomoea batatas] (GB:CAA06921.1); contains InterPro domain Fibronectin, type III-like fold; (InterPro:IPR008957);…	multiple		5.485	5.194	5.69025	7.953	5.598	5.52833	5.45867	5.543	5.619	5.82425	5.96933
245654_at		disease resistance protein (TIR-NBS-LRR class), putative; similar to disease resistance protein (TIR-NBS-LRR class), putative [Arabidopsis thaliana] (TAIR:AT2G16870.1); similar to disease resistance protein (TIR-NBS-LRR class), putative [Arabidopsis thaliana] (TAIR:AT1G56510.1); similar to disease resistance protein (TIR-NBS-LRR class), putative [Arabidopsis thaliana] (TAIR:AT1G56520.1); similar …	AT1G56540		4.1605	4.30825	5.1895	7.952	3.538	3.48267	4.039	3.94967	3.907	3.5815	3.739
248602_s_at		MADS-box protein (AGL73); similar to MADS-box protein (AGL84) [Arabidopsis thaliana] (TAIR:AT5G49420.1); similar to At3g12510-like protein [Boechera stricta] (GB:ABB89768.1); contains InterPro domain Transcription factor, MADS-box; (InterPro:IPR002100), MADS-box protein (AGL84); similar to MADS-box protein (AGL73) [Arabidopsis thaliana] (TAIR:AT5G38620.1); similar to At3g12510-like protein [Boech…	multiple		4.845	5.02025	6.06225	7.94233	3.09533	3.009	2.98067	3.02867	3.176	3.2415	3.16933	yes
246731_at	AT5G27630.1	Acyl-CoA binding protein with high affinity for oleoyl-CoA. Expressed in all plant organs. Involved in fatty acid transport.	AT5G27630		5.605	5.28375	5.62125	7.93333	4.19	3.99633	4.18733	4.24533	4.82367	5.25425	4.98233	yes
266230_at		armadillo/beta-catenin repeat family protein / U-box domain-containing protein; similar to armadillo/beta-catenin repeat family protein / U-box domain-containing family protein [Arabidopsis thaliana] (TAIR:AT3G46510.1); similar to Spotted leaf protein 11 (Spotted leaf11) (Cell death-related protein SPL11) (GB:Q64HA9); similar to Os03g0275900 [Oryza sativa (japonica cultivar-group)] (GB:NP_0010497…	AT2G28830		4.771	4.7725	5.34675	7.93133	4.95733	5.089	5.77833	5.139	4.943	4.8415	4.80433
267075_at	EEL	Transcription factor homologous to ABI5. Regulates AtEm1 expression by binding directly at the AtEm1 promoter. Located in the nucleus and expressed during seed maturation in the cotyledons and later in the whole embryo.	AT2G41070		6.10575	6.14475	5.61325	7.92033	5.673	6.38067	4.50367	4.688	4.38767	4.2785	4.92733
251379_at		similar to unknown protein [Arabidopsis thaliana] (TAIR:AT2G45260.1); similar to expressed protein [Oryza sativa (japonica cultivar-group)] (GB:ABB47396.1); similar to Os10g0508100 [Oryza sativa (japonica cultivar-group)] (GB:NP_001065020.1); contains InterPro domain Protein of unknown function DUF641, plant; (InterPro:IPR006943)	AT3G60680		5.17375	5.223	5.78325	7.914	6.07333	5.871	5.87	5.422	5.393	6.10525	5.76767
265044_at	AT1G03950.1	SNF7 family protein; similar to SNF7 family protein [Arabidopsis thaliana] (TAIR:AT5G44560.1); similar to Os10g0476400 [Oryza sativa (japonica cultivar-group)] (GB:NP_001064848.1); similar to BRI1-KD interacting protein 109 [Oryza sativa (japonica cultivar-group)] (GB:BAD11337.1); similar to Os03g0639800 [Oryza sativa (japonica cultivar-group)] (GB:NP_001050739.1); contains InterPro domain Snf7; …	AT1G03950		6.03125	5.90825	6.0485	7.90233	6.263	6.17167	6.58	6.33567	6.02867	5.855	6.38333
261726_at		similar to unknown protein [Arabidopsis thaliana] (TAIR:AT4G38390.1); similar to unknown protein [Arabidopsis thaliana] (TAIR:AT1G20550.1); similar to OSJNBb0078D11.5 [Oryza sativa (japonica cultivar-group)] (GB:CAE01922.2); similar to putative auxin-independent growth promoter [Oryza sativa (japonica cultivar-group)] (GB:BAD10226.1); similar to axi 1 [Nicotiana tabacum] (GB:CAA56570.1); contains…	AT1G76270		6.03475	6.21425	5.9645	7.9	5.85667	5.58833	4.93867	4.611	4.75767	5.871	5.22533	yes
260843_at		Identical to Bet1-like protein At1g29060 [Arabidopsis Thaliana] (GB:Q8L9S0;GB:Q9LP36); similar to unknown protein [Arabidopsis thaliana] (TAIR:AT4G14600.1); similar to Os07g0577900 [Oryza sativa (japonica cultivar-group)] (GB:NP_001060092.1); similar to unknown [Striga asiatica] (GB:ABE66395.1); contains InterPro domain Target SNARE coiled-coil region; (InterPro:IPR000727); contains InterPro doma…	AT1G29060		5.147	5.2075	5.0665	7.89633	4.54667	4.487	5.17333	5.141	4.461	5.22375	5.51667	yes
253192_at		transducin family protein / WD-40 repeat family protein; similar to transducin family protein / WD-40 repeat family protein [Arabidopsis thaliana] (TAIR:AT4G18905.1); similar to WD40-like [Medicago truncatula] (GB:ABE79929.1); contains InterPro domain WD-40 repeat; (InterPro:IPR001680)	AT4G35370		6.21825	6.33975	6.35525	7.88633	5.23467	4.91033	4.88467	4.815	5.24867	5.23875	5.11967	yes
260462_at	ZIP4	A member of Zrt- and Irt-related protein (ZIP) family. transcript is induced in response to zinc deficiency in the root and shoot. Expression is regulated by copper, but response to copper deficiency is detected only after three weeks of deficiency.	AT1G10970		5.631	5.79	5.8385	7.88367	5.53533	5.66333	4.93633	5.33133	5.37633	5.69475	5.758
246743_at		F-box family protein; similar to unknown protein [Arabidopsis thaliana] (TAIR:AT1G13780.1); similar to Cyclin-like F-box; FBD [Medicago truncatula] (GB:ABE80758.1); contains InterPro domain FBD-like; (InterPro:IPR006566); contains InterPro domain Cyclin-like F-box; (InterPro:IPR001810); contains InterPro domain FBD; (InterPro:IPR013596); contains InterPro domain Leucine-rich repeat 2; (InterPro:I…	AT5G27750		5.90625	6.18525	5.927	7.881	6.08	6.29667	5.99033	5.811	5.64533	6.24625	6.11467	yes
246561_at		similar to unknown protein [Arabidopsis thaliana] (TAIR:AT3G02160.1); similar to hypothetical protein [Cleome spinosa] (GB:ABD96923.1); contains InterPro domain Bromodomain transcription factor; (InterPro:IPR006565); contains InterPro domain Histone-fold; (InterPro:IPR009072)	AT5G15570		6.0175	5.92	5.7755	7.88	6.18167	6.079	6.015	5.964	6.03967	6.52075	6.46133	yes
264814_at	AT2G17900.1, SDG37	Homology Subgroup S-ET - Protein containing an interrupted SET domain., Homology Subgroup S-ET - Protein containing an interrupted SET domain.	AT2G17900		6.32175	6.49575	6.56725	7.88	6.15333	5.909	5.816	5.68767	5.771	5.15425	5.574	yes
260633_at	AT1G62400.1	HT1 (HIGH LEAF TEMPERATURE 1); kinase/ protein threonine/tyrosine kinase; Identical to Serine/threonine-protein kinase HT1 (EC 2.7.11.1) (High leaf temperature protein 1) (HT1) [Arabidopsis Thaliana] (GB:Q2MHE4;GB:Q9MAV2); similar to protein kinase family protein [Arabidopsis thaliana] (TAIR:AT5G58950.1); similar to flag-tagged protein kinase domain of putative mitogen-activated protein kinase ki…	AT1G62400		5.18225	5.325	5.998	7.87867	4.47067	4.529	5.7	5.299	5.40167	4.5695	4.72167
263832_at		glycoside hydrolase family 28 protein / polygalacturonase (pectinase) family protein; similar to glycoside hydrolase family 28 protein / polygalacturonase (pectinase) family protein [Arabidopsis thaliana] (TAIR:AT1G43080.1); similar to glycoside hydrolase family 28 protein / polygalacturonase (pectinase) family protein [Arabidopsis thaliana] (TAIR:AT2G15470.1); similar to glycoside hydrolase fami…	AT2G40310		4.193	4.4855	5.17325	7.861	3.50233	3.48467	3.432	3.526	3.63367	3.63425	3.64167
248495_at		ATP-binding region, ATPase-like domain-containing protein; similar to ATP-binding region, ATPase-like domain-containing protein [Arabidopsis thaliana] (TAIR:AT4G24970.1); similar to Os02g0469300 [Oryza sativa (japonica cultivar-group)] (GB:NP_001046827.1); similar to OSIGBa0148D14.7 [Oryza sativa (indica cultivar-group)] (GB:CAH66201.1); similar to Unknown protein [Oryza sativa (japonica cultivar…	AT5G50780		6.353	6.1695	6.294	7.86	5.358	5.29233	5.069	5.09567	4.83533	4.47275	5.02933	yes
245863_s_at		helicase domain-containing protein; similar to helicase domain-containing protein [Arabidopsis thaliana] (TAIR:AT1G58060.1); similar to Os04g0432200 [Oryza sativa (japonica cultivar-group)] (GB:NP_001052829.1); similar to PREDICTED: similar to DEAH (Asp-Glu-Ala-His) box polypeptide 29 [Canis familiaris] (GB:XP_535238.2); contains InterPro domain Helicase-associated region; (InterPro:IPR007502); c…	multiple		5.077	5.61125	5.49625	7.85633	6.03633	5.88033	5.375	5.555	5.46933	5.90125	5.985	yes
245685_at	AT5G22220.1, E2F1	Member of the E2F transcription factors, (cell cycle genes), key components of the cyclin D/retinoblastoma/E2F pathway. Binds DPA and RBR1 proteins. Expressed throughout the cell cycle. Abundance increased by auxin through stabilization of the protein. Elevates CDK levels and activity, even under hormone-free conditions. Promotes cell division and shortens cell doubling time, inhibits cell growth…	AT5G22220		6.2885	6.336	6.2815	7.84767	5.174	4.91267	5.5	4.85067	4.728	5.3905	5.31933	yes
249446_at		leucine-rich repeat family protein / protein kinase family protein; similar to EFR (EF-TU RECEPTOR), ATP binding / kinase/ protein serine/threonine kinase [Arabidopsis thaliana] (TAIR:AT5G20480.1); similar to Os02g0215700 [Oryza sativa (japonica cultivar-group)] (GB:NP_001046291.1); similar to putative protein kinase Xa21 [Oryza sativa (japonica cultivar-group)] (GB:BAD17689.1); similar to Os02g0…	AT5G39390		5.4695	5.31775	5.74425	7.84567	4.13267	4.23267	4.732	4.77667	4.663	4.653	4.91233
245954_at	AT5G28530.1	FRS10 (FAR1-RELATED SEQUENCE 10); zinc ion binding; similar to FRS11 (FAR1-RELATED SEQUENCE 11), zinc ion binding [Arabidopsis thaliana] (TAIR:AT1G10240.1); similar to FAR1 [Medicago truncatula] (GB:ABE91851.1); similar to FAR1; Zinc finger, SWIM-type [Medicago truncatula] (GB:ABE78949.1); contains InterPro domain Zinc finger, PMZ-type; (InterPro:IPR006564); contains InterPro domain Zinc finger, …	AT5G28530		6.1475	5.6475	6.02625	7.835	5.499	5.592	5.538	5.33967	5.64233	6.05425	6.269	yes
259930_at		forkhead-associated domain-containing protein / FHA domain-containing protein; similar to unknown protein [Arabidopsis thaliana] (TAIR:AT2G34110.1); similar to hypothetical protein [Oryza sativa (japonica cultivar-group)] (GB:AAX93017.1); similar to Os11g0171700 [Oryza sativa (japonica cultivar-group)] (GB:NP_001065865.1); contains InterPro domain Forkhead-associated; (InterPro:IPR000253); contai…	AT1G34355		6.595	6.5555	6.363	7.823	6.633	6.09033	5.00067	4.94533	5.69333	6.19475	5.65033	yes
251832_at	AT3G55150.1	A member of EXO70 gene family, putative exocyst subunits, conserved in land plants. Arabidopsis thaliana contains 23 putative EXO70 genes, which can be classified into eight clusters on the phylogenetic tree.	AT3G55150		4.7165	4.85575	4.65375	7.81767	6.13333	5.606	6.02333	4.059	3.766	3.87225	4.242	yes
250044_at		disease resistance protein (TIR-NBS-LRR class), putative; similar to disease resistance protein (TIR-NBS-LRR class), putative [Arabidopsis thaliana] (TAIR:AT5G11250.1); similar to disease resistance protein (TIR-NBS-LRR class), putative [Arabidopsis thaliana] (TAIR:AT2G14080.1); similar to disease resistance protein (TIR-NBS-LRR class), putative [Arabidopsis thaliana] (TAIR:AT5G18360.1); similar …	AT5G17680		5.21725	5.1835	5.29	7.81533	4.87633	4.71667	4.75033	4.55867	4.612	4.8655	5.31967
262792_at		Encodes a Maternally expressed gene (MEG) family protein	AT1G10710		4.93925	4.66925	5.28675	7.807	4.196	4.24633	4.24367	4.26833	4.48233	4.5595	4.823	yes
255755_s_at		pseudogene, putative polygalacturonase, blastp match of 52% identity and 9.5e-65 P-value to SP|P35339|PGLT_MAIZE Exopolygalacturonase precursor (EC 3.2.1.67) (ExoPG) (Pectinase) (Galacturan 1,4-alpha-galacturonidase). (Maize) {Zea mays}, glycoside hydrolase family 28 protein / polygalacturonase (pectinase) family protein; similar to glycoside hydrolase family 28 protein / polygalacturonase (pecti…	multiple		4.0025	4.453	4.49025	7.79133	3.31933	3.33633	3.28733	3.27067	3.39267	3.43825	3.56633
262758_at		F-box family protein; similar to F-box family protein [Arabidopsis thaliana] (TAIR:AT1G67190.1); similar to Os09g0454300 [Oryza sativa (japonica cultivar-group)] (GB:NP_001063351.1); similar to Os08g0469500 [Oryza sativa (japonica cultivar-group)] (GB:NP_001062012.1); similar to Cyclin-like F-box [Medicago truncatula] (GB:ABE77844.1); contains InterPro domain Cyclin-like F-box; (InterPro:IPR00181…	AT1G10780		5.429	5.555	6.08725	7.78967	6.63633	6.24133	4.79067	4.49767	5.758	5.99925	4.99667	yes
249564_at		unknown protein	AT5G38400		6.014	5.803	5.93225	7.78467	4.539	4.678	4.72	4.73467	4.734	4.86025	4.90567
247861_at		actin binding; similar to actin binding [Arabidopsis thaliana] (TAIR:AT1G31810.1); similar to IMP dehydrogenase/GMP reductase [Medicago truncatula] (GB:ABE94585.1); similar to Actin-binding FH2; Quinonprotein alcohol dehydrogenase-like [Medicago truncatula] (GB:ABE85432.1); similar to Unknown protein [Oryza sativa] (GB:AAL31655.1); contains InterPro domain Quinonprotein alcohol dehydrogenase-like…	AT5G58160		6.57	6.3395	6.3955	7.78	4.61367	4.591	4.642	4.58167	4.378	4.14825	4.621
265100_at	AT1G31010.1	single-stranded DNA binding; similar to PTAC9 (PLASTID TRANSCRIPTIONALLY ACTIVE9), single-stranded DNA binding [Arabidopsis thaliana] (TAIR:AT4G20010.1); similar to mitochondrial SBP40 [Solanum tuberosum] (GB:AAX34397.1); contains InterPro domain Nucleic acid-binding, OB-fold, subgroup; (InterPro:IPR012340); contains InterPro domain Nucleic acid-binding, OB-fold; (InterPro:IPR008994); contains In…	AT1G31010		5.83725	5.97825	6.20075	7.771	6.07633	5.87967	5.157	5.16867	5.42867	6.441	6.29567	yes
264831_at		similar to COG3148: Uncharacterized conserved protein [Yersinia intermedia ATCC 29909] (GB:ZP_00833766.1); similar to Os06g0342600 [Oryza sativa (japonica cultivar-group)] (GB:NP_001057573.1); contains InterPro domain DTW; (InterPro:IPR005636)	AT1G03687		6.13875	6.4365	6.123	7.76767	6.273	6.07433	5.58733	5.439	6.21567	6.2235	6.37267	yes
267519_at	AT2G30470.1, HSI2	HSI2 is a member of a novel family of B3 domain proteins with a sequence similar to the ERF-associated amphiphilic repression (EAR) motif. It functions as an active repressor of the Spo minimal promoter (derived from a gene for sweet potato sporamin A1) through the EAR motif. It contains a plant-specific B3 DNA-binding domain. The Arabidopsis genome contains 42 genes with B3 domains which could b…	AT2G30470		4.9665	5.0015	5.5465	7.76333	5.38433	5.43933	6.00733	5.89933	5.11133	5.2525	4.84367	yes
250841_at		spermidine synthase-related / putrescine aminopropyltransferase-related; similar to unknown protein [Arabidopsis thaliana] (TAIR:AT2G31740.1); similar to Os08g0520400 [Oryza sativa (japonica cultivar-group)] (GB:NP_001062267.1); similar to Os04g0379300 [Oryza sativa (japonica cultivar-group)] (GB:NP_001052588.1); similar to unnamed protein product [Homo sapiens] (GB:BAB55240.1); contains InterPro…	AT5G04610		5.702	5.64725	5.7685	7.75733	4.692	4.78367	4.921	4.78833	5.084	4.64425	4.99533	yes
258887_at	AT3G05630.1, PLDP2	Encodes a member of the PXPH-PLD subfamily of phospholipase D proteins. Regulates vesicle trafficking. Required for auxin transport and distribution and hence auxin responses. This subfamily is novel structurally different from the majority of plant PLDs by having phox homology (PX) and pleckstrin homology (PH) domains. Involved regulating root development in response to nutrient limitation. Play…	AT3G05630		5.2765	5.36575	5.15925	7.75667	3.96233	4.14733	4.20567	4.42833	3.999	4.17375	4.313
264925_at		similar to unknown protein [Arabidopsis thaliana] (TAIR:AT1G10820.2); similar to unknown protein [Oryza sativa (japonica cultivar-group)] (GB:BAD26476.1); similar to Os04g0523100 [Oryza sativa (japonica cultivar-group)] (GB:NP_001053344.1); similar to OSIGBa0153E02-OSIGBa0093I20.5 [Oryza sativa (indica cultivar-group)] (GB:CAH67876.1); contains InterPro domain Homeodomain-like; (InterPro:IPR00905…	AT1G60670		5.12375	5.09075	5.5	7.75267	6.01733	5.86767	5.83933	5.79167	5.71667	6.00725	6.02067
253157_at	AT4G35740.1, RecQl3, AT4G35740.1, RecQl3, AT4G35740.1, RecQl3	RecQl3 (Recq-like 3); ATP binding / ATP-dependent helicase; similar to RECQL2 (Arabidopsis RecQ helicase l2), ATP-dependent helicase/ protein binding [Arabidopsis thaliana] (TAIR:AT1G31360.1); similar to predicted protein [Populus alba x Populus tremula] (GB:AAR14271.1); similar to DNA helicase RECQE-like [Oryza sativa (japonica cultivar-group)] (GB:BAD19436.1); contains InterPro domain DEAD/DEAH…	AT4G35740		6.178	6.52225	6.24825	7.75167	5.73467	5.68433	5.45933	5.491	5.56733	5.802	5.83867
263095_at		hAT dimerisation domain-containing protein / transposase-related; similar to hAT dimerisation domain-containing protein / transposase-related [Arabidopsis thaliana] (TAIR:AT2G06500.1); similar to Hypothetical protein with similarity to putative Ac-like transposases [Oryza sativa] (GB:AAM08782.1); contains InterPro domain Nucleic acid-binding, OB-fold; (InterPro:IPR008994); contains InterPro domai…	AT2G16040		5.3215	5.09925	6.2145	7.73967	3.23133	3.12267	3.30067	3.263	3.33933	3.24675	3.34767
250037_at		disease resistance protein (TIR-NBS-LRR class), putative; similar to disease resistance protein (TIR-NBS-LRR class), putative [Arabidopsis thaliana] (TAIR:AT5G44510.1); similar to disease resistance protein (TIR-NBS-LRR class), putative [Arabidopsis thaliana] (TAIR:AT5G18370.1); similar to disease resistance protein (TIR-NBS-LRR class), putative [Arabidopsis thaliana] (TAIR:AT2G14080.1); similar …	AT5G18350		6.12425	6.1245	6.23425	7.738	5.07067	4.97367	5.24567	5.31233	5.41867	5.397	5.75233
254062_at		zinc finger (AN1-like) family protein; Identical to Zinc finger A20 and AN1 domain-containing stress-associated protein 10 (AtSAP10) (SAP10) [Arabidopsis Thaliana] (GB:Q9STJ9); similar to zinc finger (AN1-like) family protein [Arabidopsis thaliana] (TAIR:AT4G22820.2); similar to zinc finger protein 216-like [Oryza sativa (japonica cultivar-group)] (GB:BAD87150.1); similar to Os03g0792900 [Oryza s…	AT4G25380		6.083	6.0345	6.31225	7.738	4.888	5.37633	4.711	4.689	4.75233	5.0595	5.55633	yes
266786_at		non-LTR retrotransposon family (LINE), has a 1.3e-43 P-value blast match to GB:NP_038605 L1 repeat, Tf subfamily, member 30 (LINE-element) (Mus musculus)	AT2G28980		4.6595	4.52175	4.98525	7.733	3.53	3.66033	3.73267	3.76133	3.67933	3.66875	3.70433	yes
257366_s_at		transmembrane protein-related; similar to emp24/gp25L/p24 family protein [Arabidopsis thaliana] (TAIR:AT2G03290.1); similar to emp24 protein [Hyacinthus orientalis] (GB:AAT08688.1); similar to Os03g0376000 [Oryza sativa (japonica cultivar-group)] (GB:NP_001050219.1); similar to Os07g0632700 [Oryza sativa (japonica cultivar-group)] (GB:NP_001060368.1); contains InterPro domain emp24/gp25L/p24; (In…	multiple		4.24	4.404	4.07875	7.726	3.506	3.43333	3.46133	3.41067	3.52533	4.66475	3.783
253406_at		zinc finger (GATA type) family protein; Identical to GATA transcription factor 11 (AtGATA-11) (GATA11) [Arabidopsis Thaliana] (GB:O82632); similar to zinc finger (GATA type) family protein [Arabidopsis thaliana] (TAIR:AT5G25830.1); similar to Zinc finger, GATA-type [Medicago truncatula] (GB:ABE78372.1); contains InterPro domain Zinc finger, GATA-type; (InterPro:IPR000679)	AT4G32890		6.0415	6.21475	6.299	7.72367	5.65233	5.83467	5.213	5.383	5.00533	5	5.15867
248783_at		pentatricopeptide (PPR) repeat-containing protein; similar to binding [Arabidopsis thaliana] (TAIR:AT1G12775.1); similar to PPR repeat containing protein [Brassica oleracea] (GB:ABD64962.1); contains InterPro domain Pentatricopeptide repeat; (InterPro:IPR002885); contains InterPro domain Protein prenyltransferase; (InterPro:IPR008940); contains InterPro domain Tetratricopeptide-like helical; (Int…	AT5G47360		6.596	6.365	6.218	7.70233	6.31967	6.172	6.285	6.47067	6.50167	6.30675	6.19967
255769_at		kelch repeat-containing protein; similar to unknown protein [Arabidopsis thaliana] (TAIR:AT1G74150.1); similar to hypothetical protein DDBDRAFT_0191741 [Dictyostelium discoideum AX4] (GB:XP_629287.1); similar to Os01g0300900 [Oryza sativa (japonica cultivar-group)] (GB:NP_001042819.1); contains InterPro domain Kelch; (InterPro:IPR011498); contains InterPro domain Galactose oxidase, central; (Inte…	AT1G18610		6.005	6.168	5.8515	7.69733	4.66333	4.38533	4.64133	4.726	4.492	5.308	5.374	yes
259353_at		aminotransferase class IV family protein; Identical to Branched-chain-amino-acid aminotransferase-like protein 1 (Atbcat- like) [Arabidopsis Thaliana] (GB:Q8W0Z7;GB:Q9MAA0); similar to aminotransferase class IV family protein [Arabidopsis thaliana] (TAIR:AT5G27410.1); similar to Aminotransferase, class IV [Medicago truncatula] (GB:ABE80609.1); similar to branched-chain amino acid aminotransferase…	AT3G05190		5.922	6.22725	6.02625	7.68467	6.05767	6.04067	5.70233	5.488	5.975	6.42525	6.324
254323_at		auxin-responsive family protein; similar to auxin-responsive family protein [Arabidopsis thaliana] (TAIR:AT4G12410.1); similar to Auxin responsive SAUR protein [Medicago truncatula] (GB:ABE93517.1); similar to Os04g0537100 [Oryza sativa (japonica cultivar-group)] (GB:NP_001053425.1); similar to Os02g0643800 [Oryza sativa (japonica cultivar-group)] (GB:NP_001047561.1); contains InterPro domain Aux…	AT4G22620		5.74875	5.9075	5.9555	7.684	4.908	4.677	4.558	4.61167	4.70667	4.493	4.88067
249403_at		metal-dependent phosphohydrolase HD domain-containing protein; similar to metal-dependent phosphohydrolase HD domain-containing protein [Arabidopsis thaliana] (TAIR:AT5G40290.1); similar to Os01g0109300 [Oryza sativa (japonica cultivar-group)] (GB:NP_001041793.1); similar to Metal-dependent phosphohydrolase (ISS) [Ostreococcus tauri] (GB:CAL49984.1); contains InterPro domain Metal-dependent phosp…	AT5G40270		5.48175	6.203	6.63525	7.67767	5.72733	5.85433	4.77667	4.72267	5.08267	5.8975	5.54233	yes
261461_at		unknown protein	AT1G07860		3.87475	4.3145	4.9585	7.66433	3.43933	3.68233	3.29833	3.304	3.41933	3.34525	3.33533
262106_at	AT1G02970.1	Protein kinase that negatively regulates the entry into mitosis.	AT1G02970		6.26675	6.07225	5.87975	7.66367	6.52133	6.24133	5.2	5.242	5.855	6.21475	5.834
267499_at		ATP binding; similar to ATPase [Arabidopsis thaliana] (TAIR:AT3G27120.1); similar to Tobacco mosaic virus helicase domain-binding protein [Nicotiana tabacum] (GB:AAL25088.1); contains InterPro domain AAA-protein subdomain; (InterPro:IPR003960); contains InterPro domain MIT; (InterPro:IPR007330); contains InterPro domain AAA ATPase; (InterPro:IPR003593); contains InterPro domain AAA ATPase, centra…	AT2G45500		6.11825	5.88625	6.26675	7.66333	5.44067	5.385	5.37733	5.20933	5.07067	5.65125	6.205
267275_at	AT2G30240.1, ATCHX13	member of Putative Na+/H+ antiporter family, member of Putative Na+/H+ antiporter family	AT2G30240		6.2785	5.942	6.02725	7.647	4.23833	4.11333	4.255	4.32533	4.295	3.99675	4.12133
247938_at	AT5G57140.1	ATPAP28/PAP28 (purple acid phosphatase 28); acid phosphatase/ protein serine/threonine phosphatase; similar to ATPAP29/PAP29 (purple acid phosphatase 29), acid phosphatase/ protein serine/threonine phosphatase [Arabidopsis thaliana] (TAIR:AT5G63140.1); similar to Os06g0699200 [Oryza sativa (japonica cultivar-group)] (GB:NP_001058469.1); similar to calcineurin-like phosphoesterase-like [Oryza sati…	AT5G57140		6.586	6.51025	6.63725	7.63967	4.91033	4.88833	4.76633	4.91667	4.86367	4.9005	5.11	yes
251998_at	AT3G53090.1, UPL7	encodes a ubiquitin-protein ligase containing a HECT domain. There are six other HECT-domain UPLs in Arabidopsis., encodes a ubiquitin-protein ligase containing a HECT domain. There are six other HECT-domain UPLs in Arabidopsis.	AT3G53090		6.2675	6.2475	5.947	7.63267	6.39267	6.337	6.32167	6.40467	6.16133	6.19725	6.33467	yes
267026_at		encodes a member of the DREB subfamily A-2 of ERF/AP2 transcription factor family. The protein contains one AP2 domain. There are eight members in this subfamily including DREB2A AND DREB2B that are involved in response to drought.	AT2G38340		4.4735	4.219	5.7465	7.62367	3.544	3.63033	3.51767	3.55	3.52067	3.625	4.58733
265002_at	LHT2	High-affinity transporter for neutral and acidic amino acids, expressed in tapetum tissue of anthers	AT1G24400		6.31775	5.81475	6.00025	7.62067	4.45	4.411	5.89167	6.09933	5.649	5.8685	5.52533
245510_at		C2 domain-containing protein; similar to C2 domain-containing protein [Arabidopsis thaliana] (TAIR:AT3G16510.1); similar to SRC2 [Glycine max] (GB:BAA19769.1); contains InterPro domain C2; (InterPro:IPR000008); contains InterPro domain C2 calcium/lipid-binding region, CaLB; (InterPro:IPR008973)	AT4G15740		6.248	6.31875	6.3705	7.61633	5.34633	5.635	4.66267	4.76533	4.71867	4.972	5.187
252275_at	AT3G49600.1, UBP26	Encodes a ubiquitin-specific protease., Encodes a ubiquitin-specific protease.	AT3G49600		6.34725	6.04125	5.9405	7.61633	6.282	5.91867	5.84967	5.747	5.876	5.98	5.79967
267086_at		pentatricopeptide (PPR) repeat-containing protein; similar to UDP-glucoronosyl/UDP-glucosyl transferase family protein [Arabidopsis thaliana] (TAIR:AT1G05670.1); similar to Os07g0671200 [Oryza sativa (japonica cultivar-group)] (GB:NP_001060597.1); similar to Os10g0495200 [Oryza sativa (japonica cultivar-group)] (GB:NP_001064949.1); similar to putative chloroplast RNA processing protein [Oryza sat…	AT2G32630		5.3925	5.14125	5.59375	7.597	3.95667	3.829	3.905	3.96033	4.15533	4.24325	4.23133	yes
262578_at		hAT-like transposase family (hobo/Ac/Tam3), has a 5.1e-59 P-value blast match to GB:CAA29005 ORFa of Maize Ac (hAT-element) (Zea mays)	AT1G15300		5.58475	5.83975	6.243	7.58533	5.02933	5.00333	4.91467	4.995	4.91567	5.126	5.21633	yes
258509_at		protein kinase family protein; similar to protein kinase family protein [Arabidopsis thaliana] (TAIR:AT1G67890.1); similar to protein kinase family protein [Arabidopsis thaliana] (TAIR:AT3G06630.1); similar to protein kinase family protein [Arabidopsis thaliana] (TAIR:AT3G06640.1); similar to Os11g0678000 [Oryza sativa (japonica cultivar-group)] (GB:NP_001068453.1); similar to protein kinase fami…	AT3G06620		5.991	5.78325	5.48925	7.57133	5.17167	5.09967	5.30867	5.01967	4.92967	5.1425	5.694
250543_at		TATA-binding protein-associated phosphoprotein Dr1 protein, putative; similar to TATA-binding protein-associated phosphoprotein Dr1 protein, putative (DR1) [Arabidopsis thaliana] (TAIR:AT5G23090.1); similar to repressor protein [Glycine max] (GB:AAL73489.1); contains InterPro domain Histone-fold; (InterPro:IPR009072); contains InterPro domain Transcription factor CBF/NF-Y/archaeal histone; (Inter…	AT5G08190		5.8765	5.959	6.071	7.56867	6.304	6.474	6.071	5.925	5.92533	6.54275	6.64	yes
256087_at		F-box family protein; similar to F-box family protein [Arabidopsis thaliana] (TAIR:AT1G20795.1); contains InterPro domain Cyclin-like F-box; (InterPro:IPR001810); contains InterPro domain Galactose oxidase, central; (InterPro:IPR011043)	AT1G20800		5.00275	5.38825	5.3215	7.56667	4.17533	4.086	4.35633	4.30433	4.43533	4.583	4.75
260524_at		agenet domain-containing protein; similar to agenet domain-containing protein [Arabidopsis thaliana] (TAIR:AT1G26540.1); similar to agenet domain-containing protein [Arabidopsis thaliana] (TAIR:AT1G03300.1); similar to Agenet domain containing protein [Brassica oleracea] (GB:ABD65016.1); contains InterPro domain Agenet; (InterPro:IPR008395); contains InterPro domain Protein of unknown function DU…	AT2G47230		6.2235	6.26325	6.3915	7.55933	5.30367	5.04433	4.83833	4.946	5.30633	5.86725	5.956	yes
245032_at		transposase IS4 family protein, contains Pfam profile: PF01609 transposase DDE domain	AT2G26630		5.977	5.907	5.885	7.55333	3.683	3.68167	3.82367	3.67567	3.68833	4.002	4.014
255155_at					5.73025	5.82725	5.96	7.55	5.15633	5.79033	5.039	4.96633	5.17267	5.05125	5.76267
264979_s_at		disease resistance protein (TIR-NBS-LRR class), putative; similar to disease resistance protein (TIR-NBS-LRR class), putative [Arabidopsis thaliana] (TAIR:AT1G27180.1); similar to TIR-NBS disease resistance-like protein [Populus trichocarpa] (GB:ABB82029.1); contains InterPro domain NB-ARC; (InterPro:IPR002182); contains InterPro domain Disease resistance protein; (InterPro:IPR000767); contains I…	multiple		6.55525	6.54125	6.555	7.54667	5.662	5.65467	4.92633	4.84233	4.95967	4.87425	5.073
251839_at	AT3G54950.1	PLA IIIA/PLP7 (Patatin-like protein 7); similar to PLA IIB/PLP6 (Patatin-like protein 6), nutrient reservoir [Arabidopsis thaliana] (TAIR:AT2G39220.1); similar to putative lipid acyl hydrolase [Oryza sativa] (GB:AAK72885.1); similar to Os03g0254400 [Oryza sativa (japonica cultivar-group)] (GB:NP_001049586.1); contains InterPro domain Patatin; (InterPro:IPR002641)	AT3G54950		4.95125	5.08675	5.04825	7.53667	6.45	6.042	6.214	5.72033	5.54067	6.17275	6.03267
254728_at		similar to hypothetical protein MtrDRAFT_AC161864g11v1 [Medicago truncatula] (GB:ABE86675.1)	AT4G13690		5.338	5.306	5.20075	7.52933	4.488	4.20733	3.56467	3.65633	4.105	3.91875	3.78567	yes
264975_at		5'-AMP-activated protein kinase-related; similar to 5'-AMP-activated protein kinase beta-1 subunit-related [Arabidopsis thaliana] (TAIR:AT5G39790.1); similar to Isoamylase N-terminal domain containing protein, expressed [Oryza sativa (japonica cultivar-group)] (GB:ABF98262.1); contains domain 5'-AMP-ACTIVATED PROTEIN KINASE , BETA SUBUNIT (PTHR10343); contains domain no description (G3D.2.30.42.1…	AT1G27070		6.22175	5.95175	6.42825	7.52333	5.102	5.22633	5.73967	5.72367	5.614	5.9	5.879
254681_at		similar to NLI interacting factor (NIF) family protein [Arabidopsis thaliana] (TAIR:AT5G46410.1); similar to CTD-phosphatase-like protein [Hordeum vulgare subsp. vulgare] (GB:AAQ92971.1); similar to Os01g0629400 [Oryza sativa (japonica cultivar-group)] (GB:NP_001043640.1); contains InterPro domain NLI interacting factor; (InterPro:IPR004274), similar to NLI interacting factor (NIF) family protein…	AT4G18140		6.31325	5.84725	5.96975	7.523	5.85167	5.88767	6.28067	6.23667	5.35833	6.104	5.931
259251_at		heavy-metal-associated domain-containing protein; similar to heavy-metal-associated domain-containing protein [Arabidopsis thaliana] (TAIR:AT5G48290.1); similar to heavy metal-associated domain, putative [Medicago truncatula] (GB:ABE90826.1); similar to Os04g0469100 [Oryza sativa (japonica cultivar-group)] (GB:NP_001053042.1); similar to Os04g0469000 [Oryza sativa (japonica cultivar-group)] (GB:N…	AT3G07600		4.931	4.8575	4.8025	7.51167	6.30567	6.37233	4.29133	4.428	4.34233	4.45775	4.777
249319_s_at		WD-40 repeat family protein / zfwd3 protein (ZFWD3); similar to WD-40 repeat family protein / zfwd4 protein (ZFWD4) [Arabidopsis thaliana] (TAIR:AT5G49200.1); similar to WD-40 repeat [Trichodesmium erythraeum IMS101] (GB:YP_722799.1); similar to Os02g0677700 [Oryza sativa (japonica cultivar-group)] (GB:NP_001047729.1); similar to Os03g0145600 [Oryza sativa (japonica cultivar-group)] (GB:NP_001048…	multiple		5.3035	5.325	5.836	7.49533	3.84067	3.756	3.83633	3.686	3.788	3.78625	3.90967	yes
260061_at	AT1G73690.1	cyclin dependent kinase activator CDKD;1. Nuclear localization. Involved in cell cycle regulation and cell differentiation.	AT1G73690		6.341	6.25575	6.45675	7.494	5.362	5.00833	4.938	4.99967	4.85467	5.3945	5.59733
266675_s_at		pseudogene of the F-box protein family, contains Pfam profile PF00646: F-box domain, kelch repeat-containing F-box family protein; similar to kelch repeat-containing F-box family protein [Arabidopsis thaliana] (TAIR:AT2G29820.1); similar to Cyclin-like F-box; Serine/threonine protein phosphatase, BSU1 [Medicago truncatula] (GB:ABE89413.1); contains InterPro domain Cyclin-like F-box; (InterPro:IPR…	multiple		4.54425	4.385	4.631	7.48233	3.62367	3.60733	3.50833	3.51867	3.68	3.70475	3.67967
266441_at		similar to conserved hypothetical protein [Medicago truncatula] (GB:ABE91029.1)	AT2G43250		6.51825	6.50575	6.4305	7.48167	5.79533	5.74733	5.895	5.843	5.64633	5.95825	6.372
246973_at		ABC1 family protein; similar to ABC1 family protein [Arabidopsis thaliana] (TAIR:AT1G79600.1); similar to putative ubiquinone biosynthesis protein ubiB [Oryza sativa (japonica cultivar-group)] (GB:BAC84387.1); contains InterPro domain Protein kinase-like; (InterPro:IPR011009); contains InterPro domain Protein kinase; (InterPro:IPR000719); contains InterPro domain ABC-1; (InterPro:IPR004147)	AT5G24970		5.9335	6.111	6.36125	7.48133	5.57133	5.37	5.426	5.02067	5.74267	6.07825	6.23167	yes
253416_at		pyruvate decarboxylase, putative; similar to PDC3 (PYRUVATE DECARBOXYLASE-3), pyruvate decarboxylase [Arabidopsis thaliana] (TAIR:AT5G01330.1); similar to PDC2 (PYRUVATE DECARBOXYLASE-2), pyruvate decarboxylase [Arabidopsis thaliana] (TAIR:AT5G54960.1); similar to pyruvate decarboxylase, putative [Arabidopsis thaliana] (TAIR:AT5G01320.1); similar to pyruvate decarboxylase [Fragaria x ananassa] (G…	AT4G33070		3.87	3.71825	3.80575	7.48133	4.414	5.579	3.56667	3.41133	3.404	3.72675	3.62	yes
254060_at	AT4G25350.1	SHB1 encodes a nuclear and cytosolic protein that has motifs homologous with SYG1 protein family members. Acts in cryptochrome signaling. Overexpression of SHB1 enhanced the expression of PHYTOCHROME-INTERACTING FACTOR4 (PIF4) under red light and promoted proteasome-mediated degradation of phytochrome A and hypocotyl elongation under far-red light. A knockout allele suppressed LONG HYPOCOTYL IN F…	AT4G25350		4.9275	5.20825	5.252	7.479	4.82867	4.82933	5.11533	4.66233	4.73667	4.71075	6.01367
259463_at		aminoacyl-tRNA synthetase family; similar to unknown protein [Arabidopsis thaliana] (TAIR:AT5G25580.1); similar to aminoacyl-tRNA synthetase [Trifolium pratense] (GB:BAE71190.1)	AT1G18950		6.00075	6.06225	6.06775	7.46667	5.726	5.59333	5.49933	5.265	5.328	5.76525	5.65533	yes
255639_at	APRR8	Encodes a response-regulator like protein.	AT4G00760		6.49775	6.62425	6.37575	7.46567	5.74833	5.70467	5.614	5.64967	5.60533	5.6795	5.89833
249878_at		TATA-binding protein-associated phosphoprotein Dr1 protein, putative (DR1); Identical to Dr1 protein homolog (DR1) [Arabidopsis Thaliana] (GB:P49592); similar to TATA-binding protein-associated phosphoprotein Dr1 protein, putative [Arabidopsis thaliana] (TAIR:AT5G08190.1); similar to repressor protein [Glycine max] (GB:AAL73489.1); contains InterPro domain Histone-fold; (InterPro:IPR009072); cont…	AT5G23090		5.17	5.24825	5.72725	7.46533	6.01833	6.34833	5.93767	5.86367	5.56867	6.01975	5.801	yes
246323_at		transcription factor-related; similar to transcription factor-related [Arabidopsis thaliana] (TAIR:AT1G79020.1); similar to enhancer of polycomb-like protein [Oryza sativa (japonica cultivar-group)] (GB:BAD28718.1)	AT1G16690		6.38275	6.041	6.07975	7.465	6.18567	6.359	6.041	5.849	6.31767	6.488	6.513
265047_at	AT1G51960.1	IQD27 (IQ-domain 27); calmodulin binding; similar to IQD26 (IQ-domain 26), calmodulin binding [Arabidopsis thaliana] (TAIR:AT3G16490.1); similar to IQ calmodulin-binding motif family protein, expressed [Oryza sativa (japonica cultivar-group)] (GB:ABF94112.1); similar to Os01g0190500 [Oryza sativa (japonica cultivar-group)] (GB:NP_001042265.1); similar to Os05g0187500 [Oryza sativa (japonica culti…	AT1G51960		6.27775	6.58575	6.5555	7.46433	3.781	3.733	3.899	3.85633	3.88433	4.78225	4.58567	yes
248834_at		similar to unknown protein [Arabidopsis thaliana] (TAIR:AT5G03710.1); similar to hypothetical protein 26.t00106 [Brassica oleracea] (GB:ABD65045.1)	AT5G47090		5.6405	5.759	6.06425	7.46333	6.41767	6.56367	6.54633	6.58467	6.14	5.896	5.92967	yes
247672_at	AT5G60220.1	Member of TETRASPANIN family	AT5G60220		4.9145	4.93525	5.1145	7.461	4.27367	4.21333	4.35967	4.34333	4.59167	4.674	4.662
265269_at		similar to unknown protein [Arabidopsis thaliana] (TAIR:AT1G29820.1); similar to IMP dehydrogenase/GMP reductase [Medicago truncatula] (GB:ABE93751.1)	AT2G42950		6.23425	6.5115	5.933	7.45833	6.13367	6.00367	6.00367	6.026	6.27933	6.00475	5.985
261532_at		amino acid permease; similar to LHT2 (LYSINE HISTIDINE TRANSPORTER 2), amino acid permease [Arabidopsis thaliana] (TAIR:AT1G24400.1); similar to Os08g0127100 [Oryza sativa (japonica cultivar-group)] (GB:NP_001060901.1); similar to histidine amino acid transporter [Oryza sativa (indica cultivar-group)] (GB:CAD89802.1); contains InterPro domain Amino acid/polyamine transporter II; (InterPro:IPR0024…	AT1G71680		6.20875	6.018	5.611	7.45567	4.44	4.202	4.149	4.289	4.41333	4.49475	4.26333
260717_at		calcineurin-like phosphoesterase family protein; similar to PP7 (protein phosphatase 7), protein serine/threonine phosphatase [Arabidopsis thaliana] (TAIR:AT5G63870.1); similar to Serine/threonine-specific protein phosphatase and bis(5-nucleosyl)-tetraphosphatase [Medicago truncatula] (GB:ABE88824.1); contains InterPro domain Protein of unknown function DUF1723; (InterPro:IPR013541); contains Int…	AT1G48120		4.25775	4.47575	4.83975	7.449	4.67367	4.53733	4.04367	3.92833	3.96267	5.183	4.691
254824_s_at	AT4G12620.1, AT4G14700.1	Origin Recognition Complex subunit 1b. Involved in the initiation of DNA replication. Regulated transcriptionally during cell cycle, peaking at G1/S-phase. Target of E2F/DF family of transcription factors. Interacts with ORC2 and ORC5. Highly expressed in proliferating cells. Expression levels are independent of light regime., Origin of Replication Complex 1a subunit	multiple		6.267	6.276	6.51075	7.44833	6.13633	5.858	4.381	4.23867	5.48633	6.25425	5.644	yes
265582_at		zinc finger (C3HC4-type RING finger) family protein; Identical to Putative RING-H2 finger protein ATL2D precursor (RING-H2 finger protein ATL12) (ATL2D) [Arabidopsis Thaliana] (GB:Q9SL78); similar to zinc finger (C3HC4-type RING finger) family protein [Arabidopsis thaliana] (TAIR:AT4G28890.1); similar to RING zinc finger protein-like [Oryza sativa (japonica cultivar-group)] (GB:BAD53905.1); simil…	AT2G20030		5.31925	4.42825	5.2705	7.439	4.15367	4.027	3.904	3.86067	3.923	3.847	4.13167
262128_at		late embryogenesis abundant protein, putative / LEA protein, putative; similar to late embryogenesis abundant protein, putative / LEA protein, putative [Arabidopsis thaliana] (TAIR:AT3G15670.1); similar to late embryogenesis-abundant protein [Chorispora bungeana] (GB:AAV67892.1); contains InterPro domain Late embryogenesis abundant protein; (InterPro:IPR004238)	AT1G52690		6.16575	6.43575	6.16775	7.43633	5.12133	4.494	4.85067	4.73033	4.167	4.439	4.41967
259776_s_at		eukaryotic translation initiation factor 4E, putative / eIF-4E, putative / eIF4E, putative / mRNA cap-binding protein, putative; Identical to Putative eukaryotic translation initiation factor 4E-4 (eIF4E type 4) (eIF-4E type 4) (mRNA cap-binding protein type 4) [Arabidopsis Thaliana] (GB:Q9C7P6); similar to eukaryotic translation initiation factor 4E, putative / eIF-4E, putative / eIF4E, putative…	multiple		5.649	5.76575	6.447	7.43567	5.29433	5.37433	5.35133	5.37167	5.38167	5.374	5.29767	yes
266772_s_at		heat shock protein-related; similar to heat shock protein-related [Arabidopsis thaliana] (TAIR:AT4G16540.1); similar to hypothetical protein 25.t00003 [Brassica oleracea] (GB:ABD64966.1); contains InterPro domain HSP20-like chaperone; (InterPro:IPR008978); contains InterPro domain Heat shock protein Hsp20; (InterPro:IPR002068), heat shock protein-related; similar to heat shock protein-related [Ar…	multiple		4.65925	4.6835	5.49	7.42333	3.84133	3.98867	4.17933	4.33967	5.315	3.9785	4.26	yes
263528_at		peroxidase, putative; Identical to Peroxidase 18 precursor (EC 1.11.1.7) (Atperox P18) (PER18) [Arabidopsis Thaliana] (GB:Q9SK52); similar to peroxidase, putative [Arabidopsis thaliana] (TAIR:AT4G31760.1); similar to peroxidase [Spinacia oleracea] (GB:CAA71496.1); contains InterPro domain Haem peroxidase; (InterPro:IPR010255); contains InterPro domain Haem peroxidase, plant/fungal/bacterial; (Int…	AT2G24800		4.13675	4.44	4.662	7.42067	3.426	3.44667	3.53033	3.53433	3.464	3.44175	3.526	yes
266849_at	ALPHA-VPE	Encodes a vacuolar processing enzyme belonging to a novel group of cysteine proteinases that is expressed in vegetative organs and is upregulated in association with various types of cell death and under stressed conditions.	AT2G25940		6.55875	6.3105	6.32475	7.42	5.11867	5.01033	5.11433	5.14533	4.645	4.82625	5.129	yes
256146_at	AT1G48760.1	DELTA-ADR (DELTA-ADAPTIN); clathrin binding; similar to clathrin binding [Arabidopsis thaliana] (TAIR:AT1G60070.1); similar to Adaptin, N-terminal [Medicago truncatula] (GB:ABE78888.1); contains InterPro domain Adaptin, N-terminal; (InterPro:IPR002553); contains InterPro domain Armadillo-like helical; (InterPro:IPR011989)	AT1G48760		6.14875	6.30175	6.4895	7.41933	6.25867	6.09267	6.53167	6.233	6.24633	5.70775	5.89067
248290_at					6.299	6.32425	6.56075	7.417	6.04633	6.07333	5.874	6.146	5.782	5.99	6.29933
249423_at		similar to unknown protein [Arabidopsis thaliana] (TAIR:AT1G69610.1); similar to conserved hypothetical protein [Medicago truncatula] (GB:ABD32213.1); contains InterPro domain Protein of unknown function DUF1666; (InterPro:IPR012870)	AT5G39785	*	5.67725	5.981	6.282	7.41667	5.65	5.98367	5.68233	5.75533	4.79833	5.32925	5.58133	yes
261259_at		c-myc binding protein, putative / prefoldin, putative; similar to hypothetical protein DDBDRAFT_0218702 [Dictyostelium discoideum AX4] (GB:XP_638247.1); similar to Os07g0595800 [Oryza sativa (japonica cultivar-group)] (GB:NP_001060168.1); contains InterPro domain Prefoldin; (InterPro:IPR009053); contains InterPro domain Prefoldin alpha-like; (InterPro:IPR004127)	AT1G26660		5.4915	5.94775	5.93225	7.409	5.77333	5.79833	4.76333	4.79133	4.909	5.58175	5.14067	yes
250113_at	FRL1	family member of FRI-related genes that is required for the winter-annual habit. Genbank accession BK004884	AT5G16320		5.908	6.0215	5.84125	7.40833	5.435	5.24567	5.56467	5.564	5.47067	5.07825	5.47367
246444_at		tatD-related deoxyribonuclease family protein; similar to tatD-related deoxyribonuclease family protein [Arabidopsis thaliana] (TAIR:AT3G03500.1); similar to Os04g0577500 [Oryza sativa (japonica cultivar-group)] (GB:NP_001053632.1); similar to H0404F02.5 [Oryza sativa (indica cultivar-group)] (GB:CAH66729.1); contains InterPro domain TatD-related deoxyribonuclease; (InterPro:IPR001130)	AT5G17570		6.251	6.3115	6.41575	7.40667	5.676	5.53667	5.56567	5.745	5.82133	6.03875	5.75167	yes
255407_at		ankyrin repeat family protein; similar to ankyrin repeat family protein [Arabidopsis thaliana] (TAIR:AT4G03440.1); similar to Os07g0527800 [Oryza sativa (japonica cultivar-group)] (GB:NP_001059835.1); similar to ankyrin repeat family protein-like [Oryza sativa (japonica cultivar-group)] (GB:BAD28446.1); contains InterPro domain Ankyrin; (InterPro:IPR002110)	AT4G03480		5.633	5.73925	5.757	7.40633	5.08633	5.05667	4.59567	4.57933	4.82767	4.6655	4.798
248898_at	AT5G46370.1, KCO2	Encodes AtTPK2 (KCO2), a member of the Arabidopsis thaliana K+ channel family of AtTPK/KCO proteins. AtTPK2 is targeted to the vacuolar membrane. May form homomeric ion channels in vivo., Encodes AtTPK2 (KCO2), a member of the Arabidopsis thaliana K+ channel family of AtTPK/KCO proteins. AtTPK2 is targeted to the vacuolar membrane. May form homomeric ion channels in vivo.	AT5G46370		6.41725	6.37675	6.26525	7.40067	4.12267	4.349	4.079	4.06667	4.26133	4.06	3.87667	yes
248586_at		F-box family protein; similar to F-box family protein [Arabidopsis thaliana] (TAIR:AT1G33530.1); similar to F-box protein interaction domain [Medicago truncatula] (GB:ABE93710.1); contains InterPro domain Cyclin-like F-box; (InterPro:IPR001810); contains InterPro domain Galactose oxidase, central; (InterPro:IPR011043)	AT5G49610		6.227	6.535	6.48225	7.39867	5.92533	5.93033	6.11367	6.29533	5.98767	6.29325	6.28633	yes
245143_at		similar to unknown protein [Arabidopsis thaliana] (TAIR:AT3G60890.1)	AT2G45450		5.22875	5.502	5.37925	7.39567	4.42133	4.664	5.335	5.35833	5.56967	5.0975	5.48367
259283_at	AT3G11440.1, ATMYB65	Member of the R2R3-MYB gene family. Similar to GA-induced Barley myb gene. May be induced during germination in response to GA. Double mutants with MYB33 are male sterile, showing defects in pollen development and anther development. Contains a binding site for miRNA159 and may be spatially regulated by this micro RNA. The male sterile phenotype of the MYB33/MYB65 double mutant is light and tempe…	AT3G11440		6.18475	6.397	6.14275	7.39267	5.84767	6.10833	6.20667	6.255	5.66867	5.77575	6.11367
253892_at		similar to unknown protein [Arabidopsis thaliana] (TAIR:AT4G27610.3); similar to unknown protein [Oryza sativa (japonica cultivar-group)] (GB:BAD29314.1); contains InterPro domain Prefoldin; (InterPro:IPR009053)	AT4G27620		5.2635	6.0285	5.93825	7.39033	5.03	5.02533	5.561	5.357	6.095	5.8835	6.11033
256467_at		copia-like retrotransposon family, has a 1.2e-230 P-value blast match to gb|AAO73527.1| gag-pol polyprotein (Glycine max) (SIRE1) (Ty1_Copia-family), copia-like retrotransposon family, has a 9.0e-230 P-value blast match to gb|AAO73527.1| gag-pol polyprotein (Glycine max) (SIRE1) (Ty1_Copia-family)	multiple		5.61875	5.377	5.3035	7.38567	4.637	4.596	4.561	4.53433	4.65333	4.51625	4.50967
246433_at		similar to unknown protein [Arabidopsis thaliana] (TAIR:AT3G03460.1); similar to expressed protein [Oryza sativa (japonica cultivar-group)] (GB:ABG22017.1)	AT5G17510		6.117	6.394	6.3415	7.373	5.31633	4.987	5.18067	4.926	5.14233	5.5695	5.46167
252334_at		mitochondrial phosphate transporter, putative; similar to mitochondrial phosphate transporter [Arabidopsis thaliana] (TAIR:AT5G14040.1); similar to mitochondrial phosphate transporter [Zea mays] (GB:BAA31583.1); contains InterPro domain Adenine nucleotide translocator 1; (InterPro:IPR002113); contains InterPro domain Mitochondrial substrate carrier; (InterPro:IPR001993)	AT3G48850		5.88175	5.79575	6.01325	7.365	5.129	4.98233	5.44967	5.55433	5.54533	5.431	5.64933
263699_at	AT1G31120.1, KUP10	potassium transporter, potassium transporter	AT1G31120		5.748	5.94275	6.16825	7.35933	6.54867	6.457	5.143	5.431	5.11	5.30575	6.51	yes
263850_at		similar to unknown protein [Arabidopsis thaliana] (TAIR:AT5G35870.1); similar to Os12g0498900 [Oryza sativa (japonica cultivar-group)] (GB:NP_001066815.1)	AT2G04480		5.76775	5.65675	5.40725	7.35367	5.381	5.158	4.73767	4.79867	4.96433	4.66025	4.76533	yes
252469_at		protein kinase family protein; similar to protein kinase family protein [Arabidopsis thaliana] (TAIR:AT1G16270.1); similar to Octicosapeptide/Phox/Bem1p; Protein kinase [Medicago truncatula] (GB:ABE80960.1); contains InterPro domain Protein kinase-like; (InterPro:IPR011009); contains InterPro domain Protein kinase; (InterPro:IPR000719); contains InterPro domain Tyrosine protein kinase; (InterPro:…	AT3G46920		5.99175	5.90575	5.9225	7.352	5.96133	5.999	5.923	5.979	5.46267	5.3425	5.55967	yes
257851_at		similar to unknown protein [Arabidopsis thaliana] (TAIR:AT3G19895.1); similar to Os07g0496900 [Oryza sativa (japonica cultivar-group)] (GB:NP_001059704.1); similar to unknown protein [Oryza sativa (japonica cultivar-group)] (GB:BAC79714.1); contains domain no description (G3D.3.50.60.10); contains domain Clavaminate synthase-like (SSF51197); contains domain Diaminopimelate epimerase-like (SSF5450…	AT3G12940		6.44525	6.54075	6.232	7.35167	5.27767	5.449	5.48733	5.28933	5.324	5.71875	5.77767
254622_at		KH domain-containing protein; Identical to Probable nucleic acid-binding protein At4g18375 [Arabidopsis Thaliana] (GB:P58223;GB:O49507;GB:Q8H0Y7); similar to KH domain-containing protein [Arabidopsis thaliana] (TAIR:AT5G46190.1); similar to Os08g0200400 [Oryza sativa (japonica cultivar-group)] (GB:NP_001061211.1); similar to KH, type 1 [Medicago truncatula] (GB:ABE79454.1); contains InterPro doma…	AT4G18375		5.96225	5.383	5.79075	7.34667	4.582	4.73233	4.53067	4.50367	4.76867	4.9595	5.18
265299_at		copia-like retrotransposon family, has a 4.4e-197 P-value blast match to GB:AAA57005 Hopscotch polyprotein (Ty1_Copia-element) (Zea mays)	AT2G13940		6.37525	6.327	6.219	7.34667	5.11	5.25033	5.05333	5.25633	5.258	5.394	5.70467
247129_at		glycosyl hydrolase family 38 protein; similar to glycosyl hydrolase family 38 protein [Arabidopsis thaliana] (TAIR:AT3G26720.1); similar to glycosyl hydrolase family 38 protein [Arabidopsis thaliana] (TAIR:AT5G13980.2); similar to Glycosyl hydrolases family 38 protein, expressed [Oryza sativa (japonica cultivar-group)] (GB:ABG22500.1); similar to Glycosyl hydrolases family 38 C-terminal domain, p…	AT5G66150		6.45	6.55375	6.58325	7.34433	3.933	3.75667	4.06433	4.10233	4.13633	4.2045	4.33467	yes
245440_at		RNA helicase, putative; similar to MEE29 (maternal effect embryo arrest 29), ATP-dependent RNA helicase [Arabidopsis thaliana] (TAIR:AT2G35340.1); similar to ATP-dependent RNA helicase, putative [Arabidopsis thaliana] (TAIR:AT3G26560.1); similar to EMB2733/ESP3 (EMBRYO DEFECTIVE 2733), ATP-dependent RNA helicase [Arabidopsis thaliana] (TAIR:AT1G32490.1); similar to DEAH (Asp-Glu-Ala-His) box poly…	AT4G16680		6.0015	6.328	6.25775	7.34	3.61167	3.64733	4.55967	4.55433	4.03167	3.63775	3.83233
266683_at					5.9695	6.16425	6.307	7.33367	6.50833	6.33033	6.11633	5.94867	6.105	6.33625	6.53867
256254_at		similar to unknown protein [Arabidopsis thaliana] (TAIR:AT3G11310.1); similar to PIF-like orf1 [Daucus carota] (GB:ABB83643.1); contains InterPro domain Homeodomain-like; (InterPro:IPR009057)	AT3G11290		6.517	6.55975	6.2985	7.32933	6.20167	6.32833	6.57667	6.58567	6.34567	6.6405	6.62167	yes
249245_at		DC1 domain-containing protein; similar to DC1 domain-containing protein [Arabidopsis thaliana] (TAIR:AT1G55380.1); similar to DC1 domain-containing protein [Arabidopsis thaliana] (TAIR:AT1G55440.1); similar to DC1 domain-containing protein [Arabidopsis thaliana] (TAIR:AT1G55430.1); similar to DC1 domain-containing protein [Brassica oleracea] (GB:ABD65623.1); contains InterPro domain C1-like; (Int…	AT5G42280		6.454	6.13025	5.7955	7.327	6.252	6.058	5.02233	4.90133	5.21967	4.844	5.00833
267591_at	AT2G39705.1	DVL11/RTFL8 (ROTUNDIFOLIA LIKE 8); similar to DVL8/RTFL7 (ROTUNDIFOLIA LIKE 7) [Arabidopsis thaliana] (TAIR:AT3G55515.1); similar to conserved hypothetical protein [Medicago truncatula] (GB:ABE83577.1); contains InterPro domain DVL; (InterPro:IPR012552)	AT2G39705		3.768	4.16625	4.7905	7.32567	5.77267	6.558	5.563	4.821	4.64267	4.44925	3.92767	yes
259962_at		DNA-directed RNA polymerases I, II, and III 7 kDa subunit, putative; similar to DNA-directed RNA polymerases I, II, and III 7 kDa subunit, putative [Arabidopsis thaliana] (TAIR:AT5G41010.1); similar to PREDICTED: similar to DNA-directed RNA polymerases I, II, and III 7.0 kDa polypeptide (ABC10-alpha) (RPB7.0) (RPB10alpha) (RPABC4), partial [Apis mellifera] (GB:XP_001122738.1); contains InterPro d…	AT1G53690		3.602	3.78525	3.81925	7.32	3.163	3.102	3.29167	3.12633	3.33567	3.25925	3.28433	yes
249028_at		UMUC-like DNA repair family protein; similar to REV1 (Reversionless 1), damaged DNA binding / magnesium ion binding / nucleotidyltransferase [Arabidopsis thaliana] (TAIR:AT5G44750.1); similar to putative DNA polymerase [Oryza sativa (japonica cultivar-group)] (GB:BAD87579.1); contains InterPro domain UMUC-like DNA-repair protein; (InterPro:IPR001126), UMUC-like DNA repair family protein; similar …	AT5G44740		5.8875	6.29375	6.45275	7.31767	5.08467	4.99333	5.11033	4.978	4.91167	4.81075	4.878	yes
262148_at		26.5 kDa class I small heat shock protein-like (HSP26.5-P); similar to HSP21 (HEAT SHOCK PROTEIN 21) [Arabidopsis thaliana] (TAIR:AT4G27670.1); similar to chloroplast-localized small heat shock protein 22 [Funaria hygrometrica] (GB:AAF19022.1); contains InterPro domain HSP20-like chaperone; (InterPro:IPR008978); contains InterPro domain Heat shock protein Hsp20; (InterPro:IPR002068)	AT1G52560		4.30975	4.7475	5.554	7.31733	4.35467	6.254	3.581	3.64333	3.53433	3.8385	4.15867	yes
265422_at	AT2G20800.1, NDB4, AT2G20800.1, NDB4	NDB4 (NAD(P)H DEHYDROGENASE B4); NADH dehydrogenase; similar to NDB1 (NAD(P)H DEHYDROGENASE B1), NADH dehydrogenase/ disulfide oxidoreductase [Arabidopsis thaliana] (TAIR:AT4G28220.1); similar to pyridine nucleotide-disulphide oxidoreductase family protein [Arabidopsis thaliana] (TAIR:AT4G21490.1); similar to NDB2 (NAD(P)H DEHYDROGENASE B2), disulfide oxidoreductase [Arabidopsis thaliana] (TAIR:A…	AT2G20800		5.55725	5.6695	5.57675	7.317	4.882	4.66167	4.776	4.816	4.908	4.75	5.08567
266386_at		homeobox-leucine zipper family protein / lipid-binding START domain-containing protein; similar to homeobox-leucine zipper family protein / lipid-binding START domain-containing protein [Arabidopsis thaliana] (TAIR:AT1G05230.2); similar to PDF2 (PROTODERMAL FACTOR2), DNA binding / transcription factor [Arabidopsis thaliana] (TAIR:AT4G04890.1); similar to ATML1 (MERISTEM LAYER 1), DNA binding [Ara…	AT2G32370		5.30075	5.5655	5.62425	7.3	4.726	4.73033	4.817	4.812	4.87033	4.98025	5.18333
258150_at	AT3G18160.1, AT3G18160.1	peroxin-3 family protein; similar to peroxin-3 family protein [Arabidopsis thaliana] (TAIR:AT1G48635.1); similar to Os09g0314300 [Oryza sativa (japonica cultivar-group)] (GB:NP_001062839.1); similar to PREDICTED: peroxisomal biogenesis factor 3 [Macaca mulatta] (GB:XP_001091411.1); similar to peroxisomal biogenesis factor 3 [Danio rerio] (GB:NP_956522.1); contains InterPro domain Peroxin-3; (Inte…	AT3G18160		4.8545	4.675	4.987	7.29	5.37067	5.34767	4.634	4.922	5.53733	5.46775	5.80633
256388_at		structural constituent of ribosome; similar to pentatricopeptide (PPR) repeat-containing protein [Arabidopsis thaliana] (TAIR:AT5G19020.1); similar to hypothetical protein [Oryza sativa (japonica cultivar-group)] (GB:AAV31269.1); similar to Os05g0393200 [Oryza sativa (japonica cultivar-group)] (GB:NP_001055454.1); contains InterPro domain Ribosomal protein L34e; (InterPro:IPR008195)	AT3G06180		6.62525	6.45675	6.36075	7.28967	6.11033	6.42367	6.19167	6.19567	6.201	6.50175	6.54733
264331_at		binding; similar to serine/threonine protein phosphatase-related [Arabidopsis thaliana] (TAIR:AT1G56440.1); similar to expressed protein [Oryza sativa (japonica cultivar-group)] (GB:AAR87266.1); contains InterPro domain Tetratricopeptide region; (InterPro:IPR013026); contains InterPro domain Tetratricopeptide TPR_1; (InterPro:IPR001440); contains InterPro domain Tetratricopeptide-like helical; (I…	AT1G04130		4.46	4.601	5.49325	7.28967	6.21267	6.05967	4.90767	5.25367	5.47633	6.41525	6.31033
263102_at		unknown protein	AT2G05270		4.28525	4.0735	3.96075	7.289	3.18533	3.15333	3.03733	2.99733	3.09033	3.111	2.996	yes
253699_at	AT4G29800.1	PLA IVD/PLP8 (Patatin-like protein 8); similar to PLA IIIA/PLP7 (Patatin-like protein 7) [Arabidopsis thaliana] (TAIR:AT3G54950.1); similar to putative lipid acyl hydrolase [Oryza sativa] (GB:AAK72885.1); similar to Os03g0254400 [Oryza sativa (japonica cultivar-group)] (GB:NP_001049586.1); contains InterPro domain Patatin; (InterPro:IPR002641)	AT4G29800		4.49475	4.67925	5.41875	7.28867	5.93933	5.343	3.95167	3.984	4.09633	3.725	3.84767	yes
252918_at		unknown protein	AT4G38980		6.38425	6.3895	6.6	7.28633	5.51	5.55967	5.90233	5.87967	5.627	5.62925	5.37533	yes
249598_at		S-adenosyl-L-methionine:carboxyl methyltransferase family protein; similar to S-adenosylmethionine-dependent methyltransferase [Arabidopsis thaliana] (TAIR:AT5G37990.1); similar to defense-related protein [Brassica carinata] (GB:AAK50345.1); contains InterPro domain SAM dependent carboxyl methyltransferase; (InterPro:IPR005299)	AT5G37970		4.839	4.933	5.44375	7.28133	3.59933	3.71	3.58367	5.84933	3.49933	3.5305	3.45567	yes
253509_at	AT4G31710.1, ATGLR2.4	member of Putative ligand-gated ion channel subunit family, member of Putative ligand-gated ion channel subunit family	AT4G31710		6.5675	6.34475	6.4565	7.281	5.785	5.67567	5.95	5.854	6.04767	6.0345	6.23167
264036_at					6.013	6.1335	6.549	7.27867	5.925	5.81833	5.837	5.72267	5.41967	6.31075	6.066	yes
262164_at		WD-40 repeat family protein; similar to WD-40 repeat family protein [Arabidopsis thaliana] (TAIR:AT1G36070.1); similar to WD domain, G-beta repeat containing protein [Oryza sativa (japonica cultivar-group)] (GB:AAT85309.1), WD-40 repeat family protein; similar to WD-40 repeat family protein [Arabidopsis thaliana] (TAIR:AT1G36070.1); similar to WD domain, G-beta repeat containing protein [Oryza sa…	AT1G78070		5.1555	5.408	5.8955	7.27	5.92733	5.55033	5.538	5.81967	5.02433	4.6525	4.76667
267032_at	AT2G38490.1, CIPK22	member of AtCIPKs, member of AtCIPKs	AT2G38490		6.1695	6.465	6.01675	7.26233	4.55733	4.468	4.49067	4.51567	4.51133	4.4885	4.57467	yes
249870_at	TGH	Interacts with TATA-box binding protein 2. Contains domains with strong similarity to G-patch and SWAP domains, characteristic of RNA binding and processing proteins. Colocalizes with the splicing regulator SRp34 to subnuclear particles. Role in RNA binding or processing. Mutants display developmental defects, including reduced plant height, polycotyly, and reduced vascularization. Strong genetic…	AT5G23080		5.6755	5.676	5.86075	7.26067	6.17667	6.581	6.308	6.59233	5.88033	5.39575	5.29333
255843_at	AT2G33540.1	CPL3 (C-TERMINAL DOMAIN PHOSPHATASE-LIKE 3); CTD phosphatase; similar to phosphoprotein phosphatase [Arabidopsis thaliana] (TAIR:AT5G58003.1); similar to NLI interacting factor-like phosphatase family protein, expressed [Oryza sativa (japonica cultivar-group)] (GB:ABA93957.1); similar to putative transcription regulator CPL1 [Lycopersicon esculentum] (GB:AAV92930.1); contains InterPro domain BRCT…	AT2G33540		6.33975	6.30975	6.352	7.25933	5.83233	5.86833	5.88133	5.761	5.87367	5.6845	5.75467
246537_at		short-chain dehydrogenase/reductase (SDR) family protein; similar to short-chain dehydrogenase/reductase (SDR) family protein [Arabidopsis thaliana] (TAIR:AT5G04070.1); similar to ALTE [Homo sapiens] (GB:AAQ89208.1); similar to Os09g0346600 [Oryza sativa (japonica cultivar-group)] (GB:NP_001062940.1); similar to DHRSX protein [Homo sapiens] (GB:AAH19696.2); contains InterPro domain Short-chain de…	AT5G15940		5.495	5.634	5.84375	7.255	4.222	4.66467	4.29633	4.32233	4.47633	4.60025	4.60233	yes
266443_at		F-box family protein; similar to F-box family protein / S locus-related [Arabidopsis thaliana] (TAIR:AT2G43260.1); similar to F-box domain containing protein [Brassica oleracea] (GB:ABD65166.1); contains InterPro domain Cyclin-like F-box; (InterPro:IPR001810); contains InterPro domain Galactose oxidase, central; (InterPro:IPR011043)	AT2G43270		6.19025	6.2805	6.153	7.24533	4.04867	4.03333	4.22533	4.349	4.41367	4.56375	4.57033	yes
249365_at	AT5G40600.1	EMB1875 (EMBRYO DEFECTIVE 1875); similar to unknown protein [Arabidopsis thaliana] (TAIR:AT3G27420.1)	AT5G40600		5.8475	6.04	5.871	7.233	4.741	4.78267	4.41567	4.45233	4.64767	5.395	5.76933	yes
246087_at		similar to unknown protein [Arabidopsis thaliana] (TAIR:AT2G06005.1); similar to Os02g0778300 [Oryza sativa (japonica cultivar-group)] (GB:NP_001048294.1); similar to unknown protein [Oryza sativa (japonica cultivar-group)] (GB:BAD16977.1); contains InterPro domain Prefoldin; (InterPro:IPR009053)	AT5G20580		4.87675	5.13	4.9005	7.23267	5.774	5.842	5.61333	5.77833	5.83667	5.10925	4.95267
257864_at		similar to Os02g0772500 [Oryza sativa (japonica cultivar-group)] (GB:NP_001048265.1); similar to Uncharacterized protein C14orf102 (GB:Q9H7Z3); contains InterPro domain Protein prenyltransferase; (InterPro:IPR008940); contains InterPro domain Protein of unknown function DUF1740; (InterPro:IPR013633)	AT3G17740		5.9415	5.46775	5.81475	7.23267	6.247	6.27033	6.15967	6.30833	5.835	6.41125	6.55767
256044_at		protein phosphatase 2C, putative / PP2C, putative; similar to protein phosphatase 2C, putative / PP2C, putative [Arabidopsis thaliana] (TAIR:AT2G30020.1); similar to protein phosphatase 2C [Medicago sativa] (GB:CAA72341.1); contains InterPro domain Protein phosphatase 2C; (InterPro:IPR000222); contains InterPro domain Protein phosphatase 2C-like; (InterPro:IPR001932)	AT1G07160		6.44225	6.508	6.63775	7.22767	4.50033	4.29367	6.08467	4.835	4.51467	4.84025	4.97167	yes
253065_at	AtGRF2	Growth regulating factor encoding transcription activator. One of the nine members of a GRF gene family, containing nuclear targeting domain. Mutants result in smaller leaves indicating the role of the gene in leaf development. Expressed in root, shoot and flower	AT4G37740		4.9195	5.66625	5.93475	7.227	6.35567	6.087	5.874	5.218	6.473	5.82625	5.55033
252351_at		similar to unknown protein [Oryza sativa (japonica cultivar-group)] (GB:AAU44202.1); similar to Os05g0110700 [Oryza sativa (japonica cultivar-group)] (GB:NP_001054442.1); contains InterPro domain Kinetochore-Ndc80 subunit Spc25; (InterPro:IPR013255)	AT3G48210		6.36975	6.4395	6.501	7.22667	6.37767	6.02133	5.003	4.90033	5.304	6.14	5.55833	yes
255875_s_at		protein kinase family protein; similar to protein kinase family protein [Arabidopsis thaliana] (TAIR:AT2G40560.1); similar to Protein kinase [Medicago truncatula] (GB:ABE93556.1); contains InterPro domain Protein kinase-like; (InterPro:IPR011009); contains InterPro domain Protein kinase; (InterPro:IPR000719), protein kinase family protein; similar to protein kinase family protein [Arabidopsis tha…	multiple		3.88325	4.2325	4.294	7.21433	3.452	3.51667	3.65133	3.53533	3.58467	3.64325	3.685	yes
248251_at		similar to unknown protein [Arabidopsis thaliana] (TAIR:AT2G22795.1); similar to OSJNBb0076A22.19 [Oryza sativa (japonica cultivar-group)] (GB:CAD40807.1); similar to unknown protein [Oryza sativa (japonica cultivar-group)] (GB:BAD72405.1); similar to Os01g0221300 [Oryza sativa (japonica cultivar-group)] (GB:NP_001042431.1)	AT5G53220		6.0255	6.3335	6.45025	7.214	4.553	4.75533	4.488	5.129	4.851	5.13775	5.16967	yes
247311_at		DNA-directed DNA polymerase delta catalytic subunit, putative (POLD1); Identical to DNA polymerase delta catalytic subunit (EC 2.7.7.7) (POLD1) [Arabidopsis Thaliana] (GB:Q9LVN7); similar to ATREV3 (Arabidopsis thaliana recovery protein 3), DNA binding [Arabidopsis thaliana] (TAIR:AT1G67500.1); similar to DNA polymerase delta subunit [Chlorella pyrenoidosa] (GB:BAE48221.1); similar to DNA polymer…	AT5G63960		5.16725	5.2605	5.22375	7.20967	6.23733	6.11067	5.36533	5.349	5.948	6.3125	5.69667
264795_at	AT1G08680.1, ZIGA4	A member of ARF GAP domain (AGD), A thaliana has 15 members, grouped into four classes. AGD14 belongs to the class 4, together with AGD15., A member of ARF GAP domain (AGD), A thaliana has 15 members, grouped into four classes. AGD14 belongs to the class 4, together with AGD15.	AT1G08680	*	5.649	5.8075	5.45325	7.20233	4.72967	5.49267	5.597	5.482	5.234	5.7825	5.28233
259904_at		similar to kelch repeat-containing protein [Arabidopsis thaliana] (TAIR:AT1G18610.1); similar to hypothetical protein DDBDRAFT_0191741 [Dictyostelium discoideum AX4] (GB:XP_629287.1); similar to Os01g0300900 [Oryza sativa (japonica cultivar-group)] (GB:NP_001042819.1); contains InterPro domain Kelch; (InterPro:IPR011498); contains InterPro domain Galactose oxidase, central; (InterPro:IPR011043); …	AT1G74150		5.8095	5.92425	5.9115	7.19967	4.32733	4.21667	4.11333	4.12133	4.016	4.47575	4.557	yes
258635_at		protein binding / zinc ion binding; similar to PHD finger family protein [Arabidopsis thaliana] (TAIR:AT3G52100.1); similar to PREDICTED: hypothetical protein [Strongylocentrotus purpuratus] (GB:XP_795757.2); similar to Os12g0527800 [Oryza sativa (japonica cultivar-group)] (GB:NP_001066909.1); contains InterPro domain Zinc finger, FYVE/PHD-type; (InterPro:IPR011011); contains InterPro domain Zinc…	AT3G08020		5.155	5.487	5.62325	7.19333	5.61533	5.606	5.975	6.506	6.06333	6.49675	6.377	yes
256040_at		cell division control protein CDC6b, putative (CDC6b); similar to CDC6 (CDC6) [Arabidopsis thaliana] (TAIR:AT2G29680.2); similar to Os01g0856000 [Oryza sativa (japonica cultivar-group)] (GB:NP_001044845.1); similar to putative cell division control protein 6 [Oryza sativa (japonica cultivar-group)] (GB:BAD82304.1); contains InterPro domain Winged helix repressor DNA-binding; (InterPro:IPR011991)	AT1G07270		6.03975	6.1895	6.301	7.18433	4.63	4.43167	4.06633	4.156	4.522	4.4325	4.424	yes
251099_at		kelch repeat-containing protein; similar to unknown protein [Arabidopsis thaliana] (TAIR:AT3G11000.1); similar to Kelch-like protein [Oryza sativa (japonica cultivar-group)] (GB:BAC65044.1); contains InterPro domain Galactose oxidase, central; (InterPro:IPR011043); contains InterPro domain Kelch repeat; (InterPro:IPR006652)	AT5G01660		5.78775	5.82775	5.52825	7.18133	4.99433	4.80133	4.73367	4.813	4.79733	5.1155	4.82667	yes
251567_at		similar to unknown protein [Arabidopsis thaliana] (TAIR:AT3G58320.1); contains domain TRAF-LIKE AND MATH DOMAIN-CONTAINING (PTHR10420:SF29); contains domain UBIQUITIN SPECIFIC PROTEASE FAMILY C19-RELATED (PTHR10420); contains domain no description (G3D.1.20.5.110)	AT3G58230		5.6495	5.36975	5.683	7.179	4.036	3.975	4.13433	4.19833	4.29633	4.39575	4.70067
252437_at		invertase/pectin methylesterase inhibitor family protein; similar to invertase/pectin methylesterase inhibitor family protein / DC 1.2 homolog (FL5-2I22) [Arabidopsis thaliana] (TAIR:AT5G62350.1); similar to putative ripening-related protein [Vitis vinifera] (GB:CAB85625.1); contains InterPro domain Plant invertase/pectin methylesterase inhibitor; (InterPro:IPR007186); contains InterPro domain Pe…	AT3G47380		6.433	6.3665	6.03525	7.17467	5.78433	6.37767	6.29467	5.21533	6.27	6.1235	6.267
266826_at		GCN5-related N-acetyltransferase (GNAT) family protein / amino acid kinase family protein; similar to GCN5-related N-acetyltransferase (GNAT) family protein / amino acid kinase family protein [Arabidopsis thaliana] (TAIR:AT4G37670.2); similar to Os07g0585600 [Oryza sativa (japonica cultivar-group)] (GB:NP_001060125.1); similar to putative amino-acid N-acetyltransferase [Oryza sativa (japonica cul…	AT2G22910		5.4725	5.46725	5.55575	7.17333	6.276	6.15367	6.52333	6.513	6.426	5.91625	5.64867
255472_at		pre-mRNA splicing factor, putative / SR1 protein, putative; similar to SR1 (splicing factor 2), RNA binding [Arabidopsis thaliana] (TAIR:AT1G02840.3); similar to ribonucleoprotein (GB:AAA32856.1); contains InterPro domain Nucleotide-binding, alpha-beta plait; (InterPro:IPR012677); contains InterPro domain RNA-binding region RNP-1 (RNA recognition motif); (InterPro:IPR000504), pre-mRNA splicing fa…	AT4G02430		6.5165	6.307	6.47375	7.17033	6.42033	6.561	6.08967	6.26833	6.00867	6.329	6.059	yes
258137_at	AT3G24515.1	UBC37 (ubiquitin-conjugating enzyme 34); ubiquitin-protein ligase; similar to UBC11 (ubiquitin-conjugating enzyme 11), ubiquitin-protein ligase [Arabidopsis thaliana] (TAIR:AT3G08690.1); similar to ubiquitin conjugating enzyme-like [Oryza sativa (japonica cultivar-group)] (GB:BAD52670.1); similar to Os01g0605300 [Oryza sativa (japonica cultivar-group)] (GB:NP_001043518.1); contains InterPro domai…	AT3G24515		6.23175	6.516	6.459	7.16967	5.69233	5.611	5.07533	4.995	5.416	4.774	5.04167	yes
254237_at		cysteine proteinase, putative; similar to cysteine proteinase, putative / thiol protease, putative [Arabidopsis thaliana] (TAIR:AT5G43060.1); similar to cysteine protease [Hevea brasiliensis] (GB:ABG33750.1); contains InterPro domain Peptidase, cysteine peptidase active site; (InterPro:IPR000169); contains InterPro domain Peptidase C1A, papain; (InterPro:IPR013128); contains InterPro domain Prote…	AT4G23520		5.72775	5.98425	6.5315	7.15933	4.53	4.58	4.375	4.43967	4.48933	4.73575	4.81333
260416_at	AT1G69670.1	cullin, putative, contains similarity to Cullin homolog 3 (CUL-3) SP:Q13618, GI:3639052 from (Homo sapiens); contains Pfam profile PF00888: Cullin family. Interacts with members of AtBPM family and RBX1 suggesting it is part of an E3 ligase complex involved in RUB modification.	AT1G69670		6.29975	6.33175	6.39075	7.14567	5.82567	5.71467	5.33233	5.25	5.35733	5.512	5.42433	yes
249084_at		similar to Os05g0564000 [Oryza sativa (japonica cultivar-group)] (GB:NP_001056329.1)	AT5G44150		5.26675	5.4845	5.2215	7.14167	5.82367	5.96367	5.99533	5.78233	5.794	6.03275	6.346
245498_at		binding; similar to pentatricopeptide (PPR) repeat-containing protein [Arabidopsis thaliana] (TAIR:AT1G11290.1); similar to Thymidine kinase [Medicago truncatula] (GB:ABE88233.1); contains InterPro domain Pentatricopeptide repeat; (InterPro:IPR002885); contains InterPro domain Protein prenyltransferase; (InterPro:IPR008940); contains InterPro domain Tetratricopeptide-like helical; (InterPro:IPR01…	AT4G16470		5.79325	5.815	5.9775	7.14067	5.29533	5.21433	5.11	5.24467	4.96867	5.4985	5.23867
257014_at		similar to F-box family protein [Arabidopsis thaliana] (TAIR:AT3G52680.1); similar to Cyclin-like F-box; FBD [Medicago truncatula] (GB:ABE84776.1); contains InterPro domain FBD-like; (InterPro:IPR006566); contains InterPro domain FBD; (InterPro:IPR013596); contains InterPro domain Leucine-rich repeat 2; (InterPro:IPR013101)	AT3G26930		4.632	5.3485	5.09875	7.13933	4.151	4.29867	4.07067	4.15733	4.297	4.304	4.23767	yes
246762_at	AT5G27620.1, CYCH;1	core cell cycle genes, core cell cycle genes	AT5G27620		6.26075	6.34775	5.9015	7.12767	6.114	6.07033	5.23533	5.127	5.753	5.709	5.562	yes
255898_at		similar to unknown protein [Arabidopsis thaliana] (TAIR:AT2G25010.1); similar to Os01g0738500 [Oryza sativa (japonica cultivar-group)] (GB:NP_001044189.1); similar to Os07g0507600 [Oryza sativa (japonica cultivar-group)] (GB:NP_001059740.1); similar to transposon protein, putative, Mutator sub-class [Oryza sativa (japonica cultivar-group)] (GB:ABA93972.1); contains InterPro domain Protein of unkn…	AT1G17930		6.291	6.44325	6.5815	7.12733	6.05433	6.10533	5.95067	5.96567	6.21967	6.3725	6.33867	yes
260990_at		similar to heat shock protein-related [Arabidopsis thaliana] (TAIR:AT5G47600.1); contains InterPro domain HSP20-like chaperone; (InterPro:IPR008978)	AT1G12180		5.95925	6.13575	5.95625	7.12633	4.73133	4.71167	4.85767	4.854	4.81233	5.055	5.29767
254961_at		long-chain-fatty-acid--CoA ligase, putative / long-chain acyl-CoA synthetase, putative; similar to long-chain-fatty-acid--CoA ligase / long-chain acyl-CoA synthetase [Arabidopsis thaliana] (TAIR:AT4G23850.1); similar to LACS2 (LONG-CHAIN ACYL-COA SYNTHETASE 2) [Arabidopsis thaliana] (TAIR:AT1G49430.1); similar to long-chain-fatty-acid--CoA ligase, putative / long-chain acyl-CoA synthetase, putati…	AT4G11030		5.631	5.47075	5.06025	7.122	3.567	3.56533	3.59	3.605	3.65667	3.474	3.568
250283_at		pentatricopeptide (PPR) repeat-containing protein; similar to EMB2261 (EMBRYO DEFECTIVE 2261), binding [Arabidopsis thaliana] (TAIR:AT3G49170.1); similar to PPR986-12 [Physcomitrella patens] (GB:BAD67155.1); contains InterPro domain Pentatricopeptide repeat; (InterPro:IPR002885); contains InterPro domain Protein prenyltransferase; (InterPro:IPR008940); contains InterPro domain Tetratricopeptide-l…	AT5G13270		4.79	4.7355	4.784	7.12	4.27367	3.98633	4.95867	4.924	4.86033	4.8155	4.70333
252242_at	AT3G50080.1	VFB2 (VIER F-BOX PROTEINE 2); ubiquitin-protein ligase; similar to SKIP2 (SKP1 INTERACTING PARTNER 2), ubiquitin-protein ligase [Arabidopsis thaliana] (TAIR:AT5G67250.1); similar to Avr9/Cf-9 rapidly elicited protein 189 [Nicotiana tabacum] (GB:AAP03878.1); contains InterPro domain Cyclin-like F-box; (InterPro:IPR001810); contains InterPro domain Leucine-rich repeat, cysteine-containing; (InterPr…	AT3G50080		5.20025	5.758	5.7435	7.11567	6.30767	6.30767	6.19833	6.31133	5.98433	6.215	6.20567	yes
257518_at		similar to unknown protein [Arabidopsis thaliana] (TAIR:AT1G55340.1); similar to unknown protein [Oryza sativa (japonica cultivar-group)] (GB:AAV67822.1); similar to Os03g0807200 [Oryza sativa (japonica cultivar-group)] (GB:NP_001051641.1); contains InterPro domain Protein of unknown function DUF1639; (InterPro:IPR012438)	AT3G03880		5.804	6.15275	6.4235	7.113	5.666	5.56933	5.85	5.972	5.57	6.113	5.76333	yes
250810_at		myb family transcription factor; similar to myb family transcription factor [Arabidopsis thaliana] (TAIR:AT3G10760.1); similar to NbPCL1 [Nicotiana benthamiana] (GB:BAE16280.1); similar to Os05g0412000 [Oryza sativa (japonica cultivar-group)] (GB:NP_001055539.1); contains InterPro domain Homeodomain-like; (InterPro:IPR009057); contains InterPro domain Myb-like DNA-binding region, SHAQKYF class; (…	AT5G05090		5.45875	5.556	5.85725	7.10133	4.981	5.415	5.41433	5.63767	6.04633	5.07275	4.723
264997_at	AT1G67220.1	zinc finger protein-related; Identical to Histone acetyltransferase HAC2 (EC 2.3.1.48) (HAC2) [Arabidopsis Thaliana] (GB:Q9FYH1); similar to HAC1 (P300/CBP acetyltransferase-related protein 2 gene), transcription cofactor [Arabidopsis thaliana] (TAIR:AT1G79000.1); similar to TAZ zinc finger family protein / zinc finger (ZZ type) family protein [Arabidopsis thaliana] (TAIR:AT1G16710.1); similar to…	AT1G67220		6.475	6.20525	6.4165	7.101	4.25233	4.204	4.65633	4.838	5.17667	5.308	5.86267
245764_s_at	AT1G27840.1, AT1G27840.1	transducin family protein / WD-40 repeat family protein; similar to ATCSA-1, nucleotide binding [Arabidopsis thaliana] (TAIR:AT1G27840.1); similar to putative cockayne syndrome 1 homolog [Oryza sativa (japonica cultivar-group)] (GB:BAD16204.1); contains InterPro domain WD-40 repeat; (InterPro:IPR001680); contains InterPro domain WD40-like; (InterPro:IPR011046), ATCSA-1; nucleotide binding; simila…	multiple		5.94875	5.73675	5.753	7.098	6.511	6.45533	6.53567	6.37633	6.13833	6.635	6.55233
265316_at		myb family transcription factor; similar to PHR1 (PHOSPHATE STARVATION RESPONSE 1), transcription factor [Arabidopsis thaliana] (TAIR:AT4G28610.1); similar to CDPK substrate protein 1; CSP1 [Mesembryanthemum crystallinum] (GB:AAF32350.1); contains InterPro domain Homeodomain-like; (InterPro:IPR009057); contains InterPro domain Myb-like DNA-binding region, SHAQKYF class; (InterPro:IPR006447); cont…	AT2G20400		5.99575	6.411	6.2485	7.08133	5.21733	5.17867	5.075	5.23533	4.987	5.44125	5.60533	yes
259322_at		similar to myosin heavy chain-related [Arabidopsis thaliana] (TAIR:AT1G77580.2); similar to Protein of unknown function DUF869, plant [Medicago truncatula] (GB:ABE86171.1); contains InterPro domain DNA topoisomerases I, dispensable insert, eukaryotic-type; (InterPro:IPR009054); contains InterPro domain Spectrin repeat; (InterPro:IPR002017); contains InterPro domain t-snare; (InterPro:IPR010989); …	AT3G05270		5.4645	5.463	5.2125	7.07833	5.94067	5.878	5.24	5.37433	5.48367	5.321	5.59433
252877_at		similar to Os08g0290400 [Oryza sativa (japonica cultivar-group)] (GB:NP_001061462.1)	AT4G39630		6.174	6.395	6.2265	7.078	6.484	6.08533	4.56867	4.37233	5.51533	5.95175	4.996	yes
248603_at		transducin family protein / WD-40 repeat family protein; similar to nucleotide binding [Arabidopsis thaliana] (TAIR:AT2G47410.1); similar to Os03g0306200 [Oryza sativa (japonica cultivar-group)] (GB:NP_001049887.1); similar to expressed protein [Oryza sativa (japonica cultivar-group)] (GB:ABF95528.1); similar to Bromodomain; WD40-like [Medicago truncatula] (GB:ABD32322.1); contains InterPro domai…	AT5G49430		6.451	6.442	6.485	7.075	5.42933	5.35633	5.49467	5.586	5.63333	5.93525	6.111	yes
260936_at		similar to conserved hypothetical protein [Serratia proteamaculans 568] (GB:ZP_01534628.1); similar to Os07g0581300 [Oryza sativa (japonica cultivar-group)] (GB:NP_001060105.1)	AT1G45150		6.55	6.3135	6.12825	7.06733	5.69833	5.90533	6.09333	6.31033	5.81533	6.13775	6.28533
258725_at		DEAD/DEAH box helicase, putative; Identical to Probable DEAD-box ATP-dependent RNA helicase 45 (EC 3.6.1.-) (RH45) [Arabidopsis Thaliana] (GB:Q9SF41); similar to DEAD box RNA helicase, putative [Arabidopsis thaliana] (TAIR:AT1G20920.1); similar to DEAD-box protein abstrakt (ISS) [Ostreococcus tauri] (GB:CAL55237.1); similar to DEAD box polypeptide 46 [Mus musculus] (GB:NP_666087.2); similar to RN…	AT3G09620		5.35	5.5495	5.3425	7.06133	4.17567	4.08933	4.14967	4.16433	4.37267	3.996	4.30567	yes
267191_at	AT2G44100.1, MLO15	GDP dissociation inhibitor involved in vesicular membrane traffic, A member of a large family of seven-transmembrane domain proteins specific to plants, homologs of the barley mildew resistance locus o (MLO) protein. The Arabidopsis genome contains 15 genes encoding MLO proteins, with localization in plasma membrane. Phylogenetic analysis revealed four clades of closely-related AtMLO genes. ATMLO…	multiple		5.54775	5.30875	5.54275	7.05167	5.311	5.00167	4.46633	4.312	4.36367	4.372	4.45367
263684_at		pentatricopeptide (PPR) repeat-containing protein; similar to pentatricopeptide (PPR) repeat-containing protein [Arabidopsis thaliana] (TAIR:AT2G22410.1); similar to Pancreatic ribonuclease; Tetratricopeptide-like helical [Medicago truncatula] (GB:ABE87347.1); contains InterPro domain Pentatricopeptide repeat; (InterPro:IPR002885); contains InterPro domain Protein prenyltransferase; (InterPro:IPR…	AT1G26900		5.537	5.48225	5.70625	7.049	5.376	5.28767	5.003	4.93333	4.911	4.728	4.69967	yes
246426_at		Encodes an AP2-domain containing protein similar to ANT. Expressed in embryos and lateral root primordium.	AT5G17430		5.606	5.84175	6.095	7.04867	5.46533	5.265	4.30133	4.42433	4.36667	4.289	4.48767	yes
265087_at					5.813	5.6515	5.89675	7.04733	5.75167	6.021	5.47067	5.42767	5.172	5.717	5.79467	yes
256507_at		similar to unknown protein [Arabidopsis thaliana] (TAIR:AT3G28770.1); similar to expressed protein [Oryza sativa (japonica cultivar-group)] (GB:ABF99475.1)	AT1G75150		6.206	6.03775	6.38	7.047	4.96333	4.78533	4.14167	4.212	4.625	4.67925	4.367	yes
250172_at		similar to unknown protein [Arabidopsis thaliana] (TAIR:AT3G01730.1)	AT5G14330		5.5135	5.42325	5.5255	7.03967	5.22967	5.25467	5.07133	4.95333	5.074	4.89325	5.14933
250093_at		WD-40 repeat family protein; similar to unnamed protein product [Tetraodon nigroviridis] (GB:CAG01812.1); similar to Os07g0108000 [Oryza sativa (japonica cultivar-group)] (GB:NP_001058713.1); contains InterPro domain WD-40 repeat; (InterPro:IPR001680); contains InterPro domain WD40-like; (InterPro:IPR011046)	AT5G17370		6.3735	6.5985	6.63425	7.03333	6.07067	5.968	5.992	5.90133	5.90567	6.12825	6.037	yes
257273_at	UVH3	Required for repair of pyrimidine-pyrimidinone (6-4) dimers.	AT3G28030		5.30825	5.626	5.534	7.029	5.05333	5.06533	4.87267	4.832	4.67867	5.0825	5.45433
249351_at	ATMKK3	encodes a mitogen-activated kinase kinase	AT5G40440		6.075	6.54925	6.594	7.02567	5.431	5.52067	5.11433	4.964	5.51833	5.9605	6.158	yes
262854_at		similar to unknown protein [Arabidopsis thaliana] (TAIR:AT1G54850.1); similar to HSP20-like chaperone [Medicago truncatula] (GB:ABE82163.1); contains InterPro domain HSP20-like chaperone; (InterPro:IPR008978)	AT1G20870		5.5595	5.742	6.11325	7.02333	4.49633	4.344	4.95333	4.87433	5.45133	6.003	5.86133
251525_at		F-box family protein; similar to unknown protein [Arabidopsis thaliana] (TAIR:AT1G52650.1); similar to Cyclin-like F-box; FBD [Medicago truncatula] (GB:ABE85825.1); contains InterPro domain FBD-like; (InterPro:IPR006566); contains InterPro domain Cyclin-like F-box; (InterPro:IPR001810); contains InterPro domain Leucine-rich repeat 2; (InterPro:IPR013101), F-box family protein; similar to F-box fa…	AT3G59000		6.52925	6.39975	6.60775	7.021	6.45867	6.43767	6.18867	6.35267	6.10833	6.36325	6.239	yes
246315_at		similar to Os03g0594700 [Oryza sativa (japonica cultivar-group)] (GB:NP_001050593.1)	AT3G56870		4.97375	4.725	4.954	7.02	5.08567	4.752	4.009	3.78367	4.81233	5.0485	4.47233	yes
246269_at		protein binding / zinc ion binding; similar to unknown protein [Arabidopsis thaliana] (TAIR:AT2G23530.1); similar to Os11g0568300 [Oryza sativa (japonica cultivar-group)] (GB:NP_001068113.1); similar to unnamed protein product [Ostreococcus tauri] (GB:CAL56615.1); contains InterPro domain Zinc finger, RING-type; (InterPro:IPR001841)	AT4G37110		5.3365	5.382	5.8925	7.01967	5.87667	5.42467	5.238	4.84733	6.107	5.72	5.454	yes
261192_at	AT1G32870.1	ANAC013 (Arabidopsis NAC domain containing protein 13); transcription factor; similar to ANAC016 (Arabidopsis NAC domain containing protein 16), transcription factor [Arabidopsis thaliana] (TAIR:AT1G34180.1); similar to nam-like protein 7 [Petunia x hybrida] (GB:AAM34770.1); contains InterPro domain No apical meristem (NAM) protein; (InterPro:IPR003441)	AT1G32870		6.06975	5.82975	6.2415	7.01967	5.02567	5.059	5.52567	5.13867	5.07233	5.927	5.87367
260251_at		DNAJ heat shock N-terminal domain-containing protein; similar to DNAJ heat shock N-terminal domain-containing protein / cell division protein-related [Arabidopsis thaliana] (TAIR:AT3G11450.1); similar to DnaJ domain containing protein [Tetrahymena thermophila SB210] (GB:XP_001016844.1); similar to Os12g0502700 [Oryza sativa (japonica cultivar-group)] (GB:NP_001066831.1); contains InterPro domain …	AT1G74250		5.434	5.4245	5.17325	7.00867	5.97767	5.97233	6.15267	6.19333	5.682	5.61825	5.47533
258334_at		pentatricopeptide (PPR) repeat-containing protein; similar to pentatricopeptide (PPR) repeat-containing protein [Arabidopsis thaliana] (TAIR:AT3G06920.1); similar to putative membrane-associated protein [Oryza sativa (japonica cultivar-group)] (GB:AAL58263.1); similar to Os07g0249100 [Oryza sativa (japonica cultivar-group)] (GB:NP_001059290.1); similar to Os02g0266200 [Oryza sativa (japonica cult…	AT3G16010		4.99025	5.29125	5.49125	6.99367	5.01633	4.919	5.669	5.314	5.908	6.29875	6.08533	yes
257179_at		Encodes AtSPO11-1, one of the three Arabidopsis homologues of the archaeal DNA topoisomerase VIA subunit (topo VIA). Required for meiotic recombination. AtSPO11-1 and AtSPO11-2 have overlapping functions (i.e. both required for meiotic recombination) whereas AtSPO11-3 functions in DNA replication.	AT3G13170		5.98525	6.1675	6.26925	6.987	4.992	5.09167	4.86233	4.79933	4.93867	5.11425	5.03167	yes
257451_at	AT1G05690.1	BT3 (BTB and TAZ domain protein 3); protein binding / transcription regulator; similar to BT4 (BTB AND TAZ DOMAIN PROTEIN 4), protein binding [Arabidopsis thaliana] (TAIR:AT5G67480.2); similar to Os01g0893400 [Oryza sativa (japonica cultivar-group)] (GB:NP_001045064.1); similar to Zinc finger, TAZ-type; BTB/POZ [Medicago truncatula] (GB:ABE77424.1); contains InterPro domain Zinc finger, TAZ-type;…	AT1G05690		6.3305	6.38975	6.4405	6.986	5.04067	4.883	5.86733	6.10567	5.50867	5.624	5.60433	yes
251651_at		transcription factor IIB (TFIIB) family protein; similar to transcription initiation factor IIB-2 / general transcription factor TFIIB-2 (TFIIB2) [Arabidopsis thaliana] (TAIR:AT3G10330.1); similar to Transcription initiation factor IIB (General transcription factor TFIIB) (GB:P48513); contains InterPro domain Transcription factor TFIIB related; (InterPro:IPR000812); contains InterPro domain Trans…	AT3G57370		5.6915	5.76725	5.98075	6.98267	3.94233	3.934	3.93467	3.96833	4.09567	3.95875	3.949	yes
261712_at		alcohol dehydrogenase, putative; similar to alcohol dehydrogenase, putative [Arabidopsis thaliana] (TAIR:AT1G64710.1); similar to Os10g0159800 [Oryza sativa (japonica cultivar-group)] (GB:NP_001064203.1); similar to alcohol dehydrogenase [Solanum tuberosum] (GB:CAA37333.1); contains InterPro domain NAD-binding site; (InterPro:IPR000205); contains InterPro domain GroES-like; (InterPro:IPR011032); …	AT1G32780		6.089	6.14125	6.53375	6.98267	4.37	4.39	5.97333	5.34367	5.467	5.32775	5.44733
262249_at	RHL1	Encodes a novel nuclear protein required for root hair initiation and ploidy-dependent cell growth. Its sequence has similarity to the C-terminal domain of mammalian DNA topo IIalpha. Shows in vitro DNA binding activity and is likely to be part of the topo VI complex by binding to subunit A.	AT1G48380		5.8685	5.8435	5.77475	6.97933	5.577	5.568	5.09333	5.30467	5.39	5.768	5.39733
245872_at		BSD domain-containing protein; similar to unknown protein [Arabidopsis thaliana] (TAIR:AT1G69030.1); similar to Os04g0662000 [Oryza sativa (japonica cultivar-group)] (GB:NP_001054153.1); similar to Os02g0726400 [Oryza sativa (japonica cultivar-group)] (GB:NP_001047990.1); contains InterPro domain BSD; (InterPro:IPR005607)	AT1G26300	*	5.56475	5.71625	5.32475	6.97767	5.62467	5.76967	5.041	5.182	5.065	4.79625	4.73733
259817_at		Erv1/Alr family protein; similar to Mitochondrial sulfhydryl oxidase involved in the biogenesis of cytosolic Fe/S proteins (ISS) [Ostreococcus tauri] (GB:CAL57284.1); contains InterPro domain Erv1/Alr; (InterPro:IPR006863)	AT1G49880		5.4635	5.77925	5.53175	6.97533	5.236	5.10333	5.66833	5.56133	5.60867	5.4675	5.57133
263245_at		F-box family protein; similar to F-box family protein [Arabidopsis thaliana] (TAIR:AT5G65850.1); similar to Probable disease resistance RPP8-like protein 2 (GB:Q9MAG6); contains InterPro domain Cyclin-like F-box; (InterPro:IPR001810); contains InterPro domain F-box associated type 3; (InterPro:IPR013187); contains InterPro domain Galactose oxidase, central; (InterPro:IPR011043); contains InterPro…	AT2G31470		4.98775	5.01975	5.18075	6.97467	3.839	3.69767	3.81	3.84067	3.851	3.9645	4.01367
264971_at		proline-rich spliceosome-associated (PSP) family protein / zinc knuckle (CCHC-type) family protein; similar to proline-rich spliceosome-associated (PSP) family protein / zinc knuckle (CCHC-type) family protein [Arabidopsis thaliana] (TAIR:AT5G38600.1); similar to Zinc finger CCHC domain-containing protein 8 (GB:Q9CYA6); similar to Os06g0495700 [Oryza sativa (japonica cultivar-group)] (GB:NP_00105…	AT1G67210		6.381	6.176	6.6365	6.97467	5.256	5.11067	5.333	5.14167	5.25867	5.6255	5.653	yes
266759_at					4.76675	5.11875	6.4565	6.97433	3.218	3.35367	3.50833	3.49433	3.47733	3.58525	4.02367
266879_at	AT2G44590.1, AT2G44590.3	ADL1D; GTP binding / GTPase; Identical to Dynamin-related protein 1D (Dynamin-like protein D) (Dynamin-like protein DLP3) (DRP1D) [Arabidopsis Thaliana] (GB:Q8S3C9;GB:O80499;GB:Q9FNX3;GB:Q9FNX4); similar to ADL1 (ARABIDOPSIS DYNAMIN-LIKE PROTEIN), GTP binding [Arabidopsis thaliana] (TAIR:AT5G42080.1); similar to ADL1C (DYNAMIN-LIKE PROTEIN 5), GTP binding / GTPase [Arabidopsis thaliana] (TAIR:AT1…	AT2G44590		6.07375	6.44725	6.3555	6.97367	4.023	3.896	4.25433	4.33867	4.46733	4.166	4.31233	yes
253012_at		glycine-rich protein; similar to unknown protein [Arabidopsis thaliana] (TAIR:AT2G22660.2); similar to Protein of unknown function DUF1399 [Medicago truncatula] (GB:ABE84186.1); contains InterPro domain Protein of unknown function DUF1399; (InterPro:IPR009836)	AT4G37900		4.91525	4.49475	4.82475	6.972	4.82833	4.58433	4.528	4.44	4.11933	4.18175	3.92967	yes
251209_at		binding; similar to binding [Arabidopsis thaliana] (TAIR:AT5G40405.1); similar to Os01g0176300 [Oryza sativa (japonica cultivar-group)] (GB:NP_001042180.1); similar to Asp/Glu racemase; Tetratricopeptide-like helical [Medicago truncatula] (GB:ABE83029.1); contains InterPro domain Pentatricopeptide repeat; (InterPro:IPR002885); contains InterPro domain Tetratricopeptide-like helical; (InterPro:IPR…	AT3G62890		5.369	5.23325	5.41625	6.97067	4.08733	3.91867	4.04	4.053	4.219	4.63675	4.64	yes
252269_at		similar to unknown protein [Arabidopsis thaliana] (TAIR:AT3G49570.1); similar to unknown protein [Brassica rapa subsp. pekinensis] (GB:AAQ92331.1)	AT3G49580		3.854	3.9245	3.8165	6.97033	3.45933	3.419	3.664	4.64133	3.78467	3.5585	3.558
254664_at		eIF4-gamma/eIF5/eIF2-epsilon domain-containing protein; similar to eIF4-gamma/eIF5/eIF2-epsilon domain-containing protein [Arabidopsis thaliana] (TAIR:AT3G02270.1); similar to eIF4-gamma/eIF5/eIF2-epsilon domain-containing protein [Arabidopsis thaliana] (TAIR:AT2G34970.1); similar to hypothetical protein DDBDRAFT_0185388 [Dictyostelium discoideum AX4] (GB:XP_639192.1); similar to Os02g0812400 [Or…	AT4G18300		4.7485	4.84475	4.933	6.96933	5.13833	5.34167	5.07567	4.94433	4.701	4.93	5.458	yes
258011_at		homeobox protein (HAT 3.1); Identical to Homeobox protein HAT3.1 (HAT3.1) [Arabidopsis Thaliana] (GB:Q04996;GB:Q9LT66); similar to PRHA (PATHOGENESIS RELATED HOMEODOMAIN PROTEIN A), transcription factor [Arabidopsis thaliana] (TAIR:AT4G29940.1); similar to Homeobox protein HOX1A (GB:P46605); contains InterPro domain Zinc finger, FYVE/PHD-type; (InterPro:IPR011011); contains InterPro domain Homeod…	AT3G19510		5.178	5.2805	5.25225	6.962	5.697	5.38567	4.94867	4.83233	4.913	5.20675	5.07667
262478_at		similar to unknown protein [Arabidopsis thaliana] (TAIR:AT1G61240.3); similar to putative lysine ketoglutarate reductase trans-splicing related 1 [Oryza sativa (japonica cultivar-group)] (GB:BAD62500.1); similar to Os07g0564800 [Oryza sativa (japonica cultivar-group)] (GB:NP_001060006.1); similar to Os06g0731900 [Oryza sativa (japonica cultivar-group)] (GB:NP_001058667.1); contains InterPro domai…	AT1G11170		5.18725	5.3085	5.21975	6.96133	5.542	4.82133	4.74133	5.17433	4.45467	4.58925	4.71533
251318_at		intracellular protein transport protein USO1-related; similar to intracellular protein transport protein USO1-related [Arabidopsis thaliana] (TAIR:AT2G46180.1); similar to unnamed protein product [Ostreococcus tauri] (GB:CAL56521.1); similar to hypothetical protein DDBDRAFT_0216773 [Dictyostelium discoideum AX4] (GB:XP_646811.1); similar to Os08g0386900 [Oryza sativa (japonica cultivar-group)] (G…	AT3G61570		6.169	6.0555	6.3225	6.95767	6.514	6.456	6.26667	6.166	5.95567	6.27575	6.44633
266055_at		pre-mRNA splicing factor PRP38 family protein; similar to unknown protein [Arabidopsis thaliana] (TAIR:AT5G53440.1); similar to ATSRL1, binding [Arabidopsis thaliana] (TAIR:AT5G37370.1); similar to Os09g0103600 [Oryza sativa (japonica cultivar-group)] (GB:NP_001062557.1); similar to pre-mRNA processing factor [Triticum aestivum] (GB:AAY84870.1); contains InterPro domain PRP38; (InterPro:IPR005037)	AT2G40650		4.789	4.9155	5.243	6.95233	6.34	6.47933	6.46233	6.252	6.19833	5.952	5.77567	yes
256646_at		DC1 domain-containing protein; similar to DC1 domain-containing protein [Arabidopsis thaliana] (TAIR:AT5G42280.1); similar to DC1 domain-containing protein [Brassica oleracea] (GB:ABD65623.1); contains InterPro domain Zinc finger, FYVE/PHD-type; (InterPro:IPR011011); contains InterPro domain Zinc finger, PHD-type; (InterPro:IPR001965); contains InterPro domain C1-like; (InterPro:IPR011424); conta…	AT3G13590		5.3045	5.5055	5.6025	6.95167	5.43133	5.41767	5.15	5.093	5.301	5.47575	5.30067
265263_at		DNA-binding family protein; similar to DNA-binding protein-related [Arabidopsis thaliana] (TAIR:AT2G45430.1); similar to Os04g0590200 [Oryza sativa (japonica cultivar-group)] (GB:NP_001053704.1); similar to hypothetical protein 23.t00073 [Brassica oleracea] (GB:ABD65635.1); similar to Os02g0448000 [Oryza sativa (japonica cultivar-group)] (GB:NP_001046754.1); contains InterPro domain Protein of un…	AT2G42940		5.85775	5.8565	5.77725	6.944	4.77	4.537	4.883	5.09467	4.808	5.03825	5.29667
246262_at		pentatricopeptide (PPR) repeat-containing protein; similar to pentatricopeptide (PPR) repeat-containing protein [Arabidopsis thaliana] (TAIR:AT3G24000.1); similar to Pentatricopeptide repeat [Medicago truncatula] (GB:ABE84669.1); contains InterPro domain Pentatricopeptide repeat; (InterPro:IPR002885); contains InterPro domain Protein prenyltransferase; (InterPro:IPR008940); contains InterPro doma…	AT1G31790		5.43275	5.4605	5.68475	6.94367	4.17533	4.18967	4.534	4.723	4.841	4.96225	4.845
250955_at		similar to unknown protein [Arabidopsis thaliana] (TAIR:AT3G53400.1); similar to conserved hypothetical protein [Medicago truncatula] (GB:ABD32814.1); contains domain no description (G3D.3.40.50.150); contains domain S-adenosyl-L-methionine-dependent methyltransferases (SSF53335); contains domain "Winged helix" DNA-binding domain (SSF46785)	AT5G03190		5.97425	6.03575	5.8675	6.94267	5.12967	4.966	5.001	5.081	5.67	6.2855	6.29567
259563_s_at	AT1G20610.1	cyclin, putative; similar to CYCB2,3 (CYCLIN B2,3), cyclin-dependent protein kinase regulator [Arabidopsis thaliana] (TAIR:AT1G20610.1); similar to cyclin [Oryza sativa (indica cultivar-group)] (GB:CAA57556.1); similar to Os06g0726800 [Oryza sativa (japonica cultivar-group)] (GB:NP_001058632.1); contains InterPro domain Cyclin, N-terminal; (InterPro:IPR006671); contains InterPro domain Cyclin-lik…	multiple		6.219	6.2515	6.22925	6.941	6.44833	6.233	4.573	4.478	5.33133	6.226	5.34367	yes
265797_at		glycogenin glucosyltransferase (glycogenin)-related; similar to glycogenin glucosyltransferase (glycogenin)-related [Arabidopsis thaliana] (TAIR:AT4G16600.1); similar to OSIGBa0143N19.10 [Oryza sativa (indica cultivar-group)] (GB:CAH67416.1); similar to Glycosyl transferase, family 8 [Medicago truncatula] (GB:ABE80888.1); contains InterPro domain Glycosyl transferase, family 8; (InterPro:IPR00249…	AT2G35710	*	5.71925	5.6	5.72625	6.932	4.89767	4.794	5.32033	5.16167	4.464	4.13325	4.30133
256779_at	AT3G13784.1	ATCWINV5 (ARABIDOPSIS THALIANA CELL WALL INVERTASE 5); hydrolase, hydrolyzing O-glycosyl compounds; similar to ATFRUCT5 (BETA-FRUCTOFURANOSIDASE 5), hydrolase, hydrolyzing O-glycosyl compounds / levanase [Arabidopsis thaliana] (TAIR:AT1G55120.1); similar to ATBFRUCT1/ATCWINV1 (ARABIDOPSIS THALIANA CELL WALL INVERTASE 1), beta-fructofuranosidase/ hydrolase, hydrolyzing O-glycosyl compounds [Arabid…	AT3G13784		5.375	5.39575	5.704	6.92767	5.26633	4.04867	3.78367	3.69167	3.925	4.2615	4.65533	yes
251637_at		binding; similar to Zinc finger, C2H2-type [Medicago truncatula] (GB:ABE93779.1); contains InterPro domain Armadillo-like helical; (InterPro:IPR011989)	AT3G57570		5.27225	5.597	5.27175	6.91833	6.08433	6.04367	5.837	6.14933	5.806	6.4225	6.29933
261300_at		similar to PWWP domain-containing protein [Arabidopsis thaliana] (TAIR:AT5G27650.1); contains InterPro domain Eukaryotic transcription factor, DNA-binding; (InterPro:IPR008917)	AT1G48560		5.45725	5.53775	5.75675	6.918	5.43633	5.463	5.031	4.79133	4.91967	5.8805	5.51333
245458_at		kinase; similar to casein kinase II alpha chain, putative [Arabidopsis thaliana] (TAIR:AT2G23070.1); similar to Protein kinase domain containing protein, expressed [Oryza sativa (japonica cultivar-group)] (GB:ABB47989.1); contains InterPro domain Serine/threonine protein kinase; (InterPro:IPR002290); contains InterPro domain Protein kinase-like; (InterPro:IPR011009); contains InterPro domain Prot…	AT4G16970		6.04025	6.33225	6.42525	6.90733	5.95267	5.76967	5.45867	5.422	5.855	5.94	5.52367	yes
266298_at		thioesterase family protein; similar to thioesterase family protein [Arabidopsis thaliana] (TAIR:AT1G04290.1); similar to thioesterase family protein [Zea mays] (GB:AAT67463.1); similar to Os02g0521700 [Oryza sativa (japonica cultivar-group)] (GB:NP_001046977.1); contains InterPro domain Thioesterase superfamily; (InterPro:IPR006683)	AT2G29590		6.17175	5.71525	6.088	6.907	5.45467	5.439	5.60167	5.51367	5.766	5.84775	5.61533
263877_at		similar to unknown protein [Arabidopsis thaliana] (TAIR:AT4G39360.1)	AT2G21780		5.119	5.07925	5.248	6.901	3.31	3.33167	3.32867	3.304	3.34533	3.48525	3.477
248850_at		DNA-binding bromodomain-containing protein; similar to ATBET9 (ARABIDOPSIS THALIANA BROMODOMAIN AND EXTRATERMINAL DOMAIN PROTEIN 9), DNA binding [Arabidopsis thaliana] (TAIR:AT5G14270.1); similar to Bromodomain [Medicago truncatula] (GB:ABE92903.1); similar to Os07g0507700 [Oryza sativa (japonica cultivar-group)] (GB:NP_001059741.1); contains InterPro domain Bromodomain; (InterPro:IPR001487)	AT5G46550		5.7055	5.3865	5.83625	6.898	6.621	6.50733	6.17433	6.33567	6.50867	6.11875	5.91733	yes
245773_at		pseudogene of unknown protein	AT1G30290		5.98825	6.01675	5.8305	6.884	6.01233	6.04867	5.89	5.90867	5.992	6.63225	6.40433
262898_at		similar to Os04g0650500 [Oryza sativa (japonica cultivar-group)] (GB:NP_001054091.1); similar to H0212B02.11 [Oryza sativa (indica cultivar-group)] (GB:CAJ86182.1), binding; similar to binding [Arabidopsis thaliana] (TAIR:AT1G27210.1); similar to putative potyviral helper component protease-interacting protein 2 [Oryza sativa (japonica cultivar-group)] (GB:BAD45803.1); contains InterPro domain Ar…	multiple		5.83075	5.94625	5.993	6.88233	4.69067	4.50467	4.74833	4.72	4.91367	4.68075	5.12867	yes
250542_at		similar to unknown protein [Arabidopsis thaliana] (TAIR:AT5G23200.1); similar to Os02g0634600 [Oryza sativa (japonica cultivar-group)] (GB:NP_001047513.1); similar to hypothetical protein MA4_54B05.28 [Musa acuminata] (GB:ABF70082.1)	AT5G08270		6.1	6.01775	5.802	6.88067	6.36167	6.08	5.93467	5.89967	6.148	6.27875	6.478
265349_at		kinesin motor protein-related; similar to kinesin motor protein-related [Arabidopsis thaliana] (TAIR:AT1G72250.1); similar to Hypothetical protein [Oryza sativa (japonica cultivar-group)] (GB:AAO17019.1); similar to Os03g0114000 [Oryza sativa (japonica cultivar-group)] (GB:NP_001048740.1); contains InterPro domain Kinesin, motor region; (InterPro:IPR001752); contains InterPro domain t-snare; (Int…	AT2G22610		5.88725	5.5865	5.7945	6.87833	6.23333	5.781	4.861	4.72333	5.48433	5.8375	5.474	yes
266686_at		unknown protein	AT2G19700		6.435	6.43425	6.054	6.87633	4.43333	4.36733	4.91	4.95533	4.96133	5.02575	5.41367
245429_at		Bax inhibitor-1 family protein / BI-1 family protein; similar to ATBI-1 (ARABIDOPSIS BAX INHIBITOR 1) [Arabidopsis thaliana] (TAIR:AT5G47120.1); similar to bax inhibitor, putative [Brassica oleracea] (GB:ABD65015.1); contains InterPro domain Protein of unknown function UPF0005; (InterPro:IPR006214)	AT4G17580		5.7665	5.8535	5.6925	6.871	5.18667	5.30967	5.375	5.38467	5.37133	5.55475	5.63867
246536_at		structural maintenance of chromosomes (SMC) family protein (MSS2); similar to MIM (HYPERSENSITIVE TO MMS, IRRADIATION AND MMC), ATP binding [Arabidopsis thaliana] (TAIR:AT5G61460.1); similar to Os05g0596600 [Oryza sativa (japonica cultivar-group)] (GB:NP_001056521.1); similar to Structural maintenance of chromosome protein SMC, C-terminal [Medicago truncatula] (GB:ABE93633.1); similar to SMC5 pro…	AT5G15920		4.9585	5.1805	5.1205	6.86	5.624	5.50967	5.43533	5.234	5.46333	5.323	5.51567	yes
246910_at		exonuclease family protein; similar to exonuclease family protein [Arabidopsis thaliana] (TAIR:AT3G50100.1); similar to exonuclease family protein, putative, expressed [Oryza sativa (japonica cultivar-group)] (GB:ABA96019.2); contains InterPro domain Exonuclease; (InterPro:IPR006055); contains InterPro domain Polynucleotidyl transferase, Ribonuclease H fold; (InterPro:IPR012337); contains InterPr…	AT5G25800		5.50525	5.33625	5.761	6.85233	5.947	5.95667	5.63767	5.612	5.66633	5.77325	5.76633	yes
251366_at		F-box family protein; similar to F-box family protein [Arabidopsis thaliana] (TAIR:AT2G31470.1); similar to Probable disease resistance RPP8-like protein 2 (GB:Q9MAG6); contains InterPro domain Cyclin-like F-box; (InterPro:IPR001810); contains InterPro domain F-box associated type 3; (InterPro:IPR013187); contains InterPro domain F-box associated type 1; (InterPro:IPR006527)	AT3G61340		5.4335	4.9765	4.927	6.85067	4.00333	4.059	4.074	4.029	4.22933	4.3995	4.50333	yes
262261_at	CLE17	Member of a large family of putative ligands homologous to the Clavata3 gene. Consists of a single exon.	AT1G70895		5.65	5.8195	5.79275	6.84333	6.145	5.82	6.004	6.10867	5.97567	6.0355	5.67767
266511_at		zinc finger (CCCH type) helicase family protein; similar to helicase domain-containing protein [Arabidopsis thaliana] (TAIR:AT2G35920.1); similar to Zinc finger, CCCH-type; Beta-lactamase, class A; DEAD/DEAH box helicase [Medicago truncatula] (GB:ABE84992.1); similar to Os01g0256800 [Oryza sativa (japonica cultivar-group)] (GB:NP_001042628.1); similar to ATP-dependent RNA helicase A -like [Oryza …	AT2G47680		5.99525	6.0175	6.00925	6.84167	6.48967	6.368	6.203	6.07567	6.40633	5.68475	5.63667
253017_at		mannitol dehydrogenase, putative; similar to ELI3-2 (ELICITOR-ACTIVATED GENE 3) [Arabidopsis thaliana] (TAIR:AT4G37990.1); similar to sinapyl alcohol dehydrogenase-like protein [Populus tremula x Populus tremuloides] (GB:AAW45741.1); contains InterPro domain GroES-like; (InterPro:IPR011032); contains InterPro domain Alcohol dehydrogenase superfamily, zinc-containing; (InterPro:IPR002085); contain…	AT4G37970		5.6765	5.6805	6.02025	6.84133	6.10333	6.091	4.21033	4.43733	4.39633	4.02125	4.022	yes
253423_at	AT4G32280.1, IAA29	Auxin inducible protein., Auxin inducible protein.	AT4G32280		6.05675	5.969	6.457	6.834	4.745	4.625	5.05067	4.88367	5.00733	4.91225	5.05533	yes
256664_at		DNA-3-methyladenine glycosylase (MAG); Identical to DNA-3-methyladenine glycosylase (EC 3.2.2.21) (3-methyladenine DNA glycosidase) (MAG) [Arabidopsis Thaliana] (GB:Q39147); similar to putative DNA-3-methyladenine glycosylase [Oryza sativa (japonica cultivar-group)] (GB:BAD17141.1); similar to Os02g0774500 [Oryza sativa (japonica cultivar-group)] (GB:NP_001048275.1); contains InterPro domain Form…	AT3G12040		6.242	6.07775	6.29425	6.83267	6.341	6.16567	5.83533	5.95	5.588	5.108	5.34367	yes
261009_at					5.382	5.21875	6.4795	6.83267	4.36967	4.35367	4.31233	4.22933	4.31133	4.485	4.69233
261870_at	AT1G11570.1	NTL (NTF2-LIKE); protein transporter; similar to NTF2B (NUCLEAR TRANSPORT FACTOR 2B) [Arabidopsis thaliana] (TAIR:AT1G27970.2); similar to NTF2A (NUCLEAR TRANSPORT FACTOR 2A), Ran GTPase binding / protein transporter [Arabidopsis thaliana] (TAIR:AT1G27310.1); similar to Os01g0788200 [Oryza sativa (japonica cultivar-group)] (GB:NP_001044479.1); similar to hypothetical protein FG08477.1 [Gibberella…	AT1G11570		5.26925	5.26175	6	6.821	4.80767	4.53467	4.40767	4.317	4.45967	4.6025	4.53067	yes
262529_at		leucine-rich repeat family protein; similar to leucine-rich repeat family protein [Arabidopsis thaliana] (TAIR:AT1G17240.1); similar to leucine-rich repeat transmembrane protein kinase, putative [Arabidopsis thaliana] (TAIR:AT1G72300.1); similar to leucine-rich receptor-like protein kinase [Daucus carota] (GB:AAL99366.1); similar to leucine-rich receptor-like protein kinase [Daucus carota] (GB:AA…	AT1G17250		6.487	6.27175	6.4795	6.81967	5.65433	5.65167	6.248	6.16067	5.513	5.8735	5.75467
266743_at	RNS1	member of the ribonuclease T2 family, responds to inorganic phosphate starvation, and inhibits production of anthocyanin. Also involved in wound-induced signaling independent of jasmonic acid.	AT2G02990		5.3975	5.31725	5.28675	6.81767	4.33567	4.27233	4.465	4.82067	4.13133	6.633	5.11167
258465_at		invertase/pectin methylesterase inhibitor family protein; Identical to Pectinmethylesterase inhibitor 2 precursor (AtPMEI2) (PMEI2) [Arabidopsis Thaliana] (GB:Q9LUV1); similar to invertase/pectin methylesterase inhibitor family protein [Arabidopsis thaliana] (TAIR:AT1G48020.1); similar to pectinmethylesterase inhibitor [Actinidia deliciosa] (GB:BAC54964.1); contains InterPro domain Plant invertas…	AT3G17220		5.198	4.96325	4.605	6.814	3.434	3.344	3.474	3.52767	3.537	3.641	3.69133
256175_at		similar to unknown protein [Arabidopsis thaliana] (TAIR:AT1G48180.1); contains domain Cysteine proteinases (SSF54001)	AT1G51670		5.41025	5.496	5.362	6.81267	4.027	4.17333	4.28833	4.34367	4.37867	5.666	5.38167
249292_at	UVH1	Confers resistance to UV radiation. Homolog of the human xeroderma pigmentosum group F DNA repair and yeast Rad1 proteins	AT5G41150		5.04625	5.0555	5.62875	6.80867	5.76233	5.56933	5.425	5.36233	5.199	4.7705	4.695	yes
256247_at	AT3G66656.1	MADS-box family protein; similar to MADS-box family protein [Arabidopsis thaliana] (TAIR:AT2G34440.1); similar to Transcription factor, MADS-box [Medicago truncatula] (GB:ABE85433.1); contains InterPro domain Transcription factor, MADS-box; (InterPro:IPR002100)	AT3G66656		4.62575	4.8055	5.0045	6.80667	4.02167	3.89267	3.871	3.956	3.999	4.286	4.40467
250576_at		cytochrome P450 family protein; similar to CYP86B1 (cytochrome P450, family 86, subfamily B, polypeptide 1), oxygen binding [Arabidopsis thaliana] (TAIR:AT5G23190.1); similar to Os10g0486100 [Oryza sativa (japonica cultivar-group)] (GB:NP_001064901.1); similar to E-class P450, group I [Medicago truncatula] (GB:ABE89065.1); contains InterPro domain E-class P450, group I; (InterPro:IPR002401); cont…	AT5G08250		5.5285	6.0405	6.14875	6.80067	5.225	4.90767	4.89733	4.97133	4.90267	5.0225	5.47167
264712_at	AT1G09810.1	ECT11 (evolutionarily conserved C-terminal region 11); similar to ECT8 (evolutionarily conserved C-terminal region 8) [Arabidopsis thaliana] (TAIR:AT1G79270.1); similar to YT521-B-like protein [Medicago truncatula] (GB:ABE79575.1); contains InterPro domain YT521-B-like protein; (InterPro:IPR007275)	AT1G09810		6.32825	6.31925	6.19875	6.79967	5.51633	5.39967	5.33667	5.49867	5.67967	5.8245	5.37033	yes
259913_at		developmentally regulated GTP-binding protein, putative; similar to ATDRG1 (ARABIDOPSIS THALIANA DEVELOPMENTALLY REGULATED G-PROTEIN 1) [Arabidopsis thaliana] (TAIR:AT1G17470.2); similar to developmentally regulated GTP binding protein [Pisum sativum] (GB:AAB67829.1); similar to Os05g0357600 [Oryza sativa (japonica cultivar-group)] (GB:NP_001055297.1); contains InterPro domain GTP-binding protein…	AT1G72660		4.6275	5.00825	5.4185	6.79767	4.11933	4.66167	4.18167	4.31667	4.26233	4.233	4.55633
254196_at		unknown protein	AT4G24030		6.459	6.3075	6.07675	6.79667	4.54	4.524	4.49533	4.476	4.467	4.615	4.45267
252029_s_at		RNA recognition motif (RRM)-containing protein; similar to RNA binding [Arabidopsis thaliana] (TAIR:AT4G00830.2); similar to RNA-binding re (GB:ABD33357.1); contains InterPro domain Nucleotide-binding, alpha-beta plait; (InterPro:IPR012677); contains InterPro domain RNA-binding region RNP-1 (RNA recognition motif); (InterPro:IPR000504), RNA binding; similar to RNA binding [Arabidopsis thaliana] (…	multiple		5.02225	4.8105	5.6685	6.78933	6.38067	6.50433	5.77467	5.774	5.792	5.83875	5.712
258423_at		similar to Os07g0517300 [Oryza sativa (japonica cultivar-group)] (GB:NP_001059789.1); similar to hypothetical protein [Oryza sativa (japonica cultivar-group)] (GB:BAC83719.1); contains InterPro domain Protein of unknown function DUF1032; (InterPro:IPR009378)	AT3G16730		5.7885	5.80725	5.984	6.78933	4.96733	4.81733	4.653	4.50867	4.727	5.44075	5.12367	yes
267434_at	AT2G26260.1	Encodes an enzyme with 3&#946;-hydroxysteroid dehydrogenase/C4-decarboxylase activity <i>in vitro</i>. The activity of the enzyme was determined using microsomal extracts of yeast overexpressing the <i>Arabidopsis</i> gene. Cytosolic fractions failed to be associated to the activity, leading to the speculation that the enzyme is membrane-bound.	AT2G26260		5.871	5.7485	5.77075	6.78667	6.033	6.026	5.24367	5.246	5.87133	5.81	5.561
247682_at		leucine-rich repeat protein kinase, putative; similar to leucine-rich repeat protein kinase, putative [Arabidopsis thaliana] (TAIR:AT5G59680.1); similar to MEE39 (maternal effect embryo arrest 39), kinase [Arabidopsis thaliana] (TAIR:AT3G46330.1); similar to leucine-rich repeat protein kinase, putative [Arabidopsis thaliana] (TAIR:AT5G59670.1); similar to Protein kinase [Medicago truncatula] (GB:…	AT5G59650		5.86475	5.9105	5.9585	6.783	4.24933	3.93667	4.07933	3.97267	4.13433	4.415	4.58133	yes
265093_at		ABC transporter family protein; Identical to Non-intrinsic ABC protein 4 (GCN-related protein 2) (NAP4) [Arabidopsis Thaliana] (GB:Q3EDJ0;GB:Q9ZWB0); similar to POP1 [Arabidopsis thaliana] (TAIR:AT5G44110.1); similar to Lipid exporter ABCA1 and related proteins, ABC superfamily (ISS) [Ostreococcus tauri] (GB:CAL55166.1); similar to Os02g0810300 [Oryza sativa (japonica cultivar-group)] (GB:NP_0010…	AT1G03905		4.7825	4.93225	5.0535	6.782	5.42067	5.39633	5.085	4.64767	4.45367	4.166	4.85367	yes
257779_at	CDG1	Receptor-like cytoplasmic kinase, RLCKVII subfamily	AT3G26940		6.53175	6.60775	6.58775	6.78067	4.95967	4.89167	4.992	5.02033	4.998	4.9475	5.215
254807_at		similar to unknown protein [Arabidopsis thaliana] (TAIR:AT2G04280.1); similar to Os10g0456400 [Oryza sativa (japonica cultivar-group)] (GB:NP_001064754.1); similar to Proteinase inhibitor I4, serpin [Medicago truncatula] (GB:ABE79305.1)	AT4G12700		5.19875	4.96275	5.2345	6.77967	5.42667	5.467	5.06633	4.694	4.86133	5.40475	5.564
264483_at		tetratricopeptide repeat (TPR)-containing protein; similar to tetratricopeptide repeat (TPR)-containing protein [Arabidopsis thaliana] (TAIR:AT4G08320.1); similar to putative tetratricopeptide repeat (TPR)-containing protein [Oryza sativa (japonica cultivar-group)] (GB:BAD33298.1); similar to Os02g0553500 [Oryza sativa (japonica cultivar-group)] (GB:NP_001047112.1); contains InterPro domain Tetra…	AT1G77230		6.53275	6.15275	5.7765	6.774	4.59567	4.549	4.643	4.80667	4.64333	5.8105	5.52733
251540_at	AT3G58740.1	Encodes a peroxisomal citrate synthase that is expressed in siliques and developing seeds.	AT3G58740		6.40275	6.55075	6.49375	6.762	4.86967	4.881	5.042	4.99233	5.164	4.93325	5.17967
258143_at		similar to unknown protein [Arabidopsis thaliana] (TAIR:AT3G18180.1); similar to glycosyltransferase [Saccharum officinarum] (GB:CAI30073.1); contains InterPro domain Protein of unknown function DUF563; (InterPro:IPR007657)	AT3G18170		5.548	5.80475	5.66975	6.75833	5.60833	5.742	4.45967	4.45133	4.87233	4.2095	4.224	yes
262874_at		similar to NERD [Medicago truncatula] (GB:ABE94711.1); contains InterPro domain NERD; (InterPro:IPR011528)	AT1G65020		4.871	4.71325	5.103	6.75533	6.24167	6.1	5.81233	5.54633	5.79667	5.98975	5.62167
247501_at		similar to unknown protein [Arabidopsis thaliana] (TAIR:AT3G14750.1); similar to transglutaminase [Zea mays] (GB:CAD13455.1); similar to transglutaminase [Zea mays] (GB:CAD32336.1)	AT5G61920		5.37625	4.9235	5.097	6.75467	3.83033	3.91633	3.98967	3.92767	3.83333	3.9975	3.99033
259144_at		kinesin motor protein-related; similar to ZCF125, microtubule motor [Arabidopsis thaliana] (TAIR:AT1G59540.1); similar to CENPE variant protein [Homo sapiens] (GB:BAE06078.1); contains InterPro domain Kinesin, motor region; (InterPro:IPR001752); contains InterPro domain Spectrin repeat; (InterPro:IPR002017)	AT3G10180	*	6.02	6.16025	6.1115	6.75333	3.92867	3.86433	4.104	4.174	4.172	4.38925	4.42067	yes
255724_at					5.3535	5.87125	5.943	6.752	5.24233	5.07667	4.899	4.78333	5.17867	5.22925	5.16767	yes
264902_at		similar to unknown protein [Arabidopsis thaliana] (TAIR:AT1G70950.1); similar to Targeting for Xklp2 [Medicago truncatula] (GB:ABE84619.1), similar to unknown protein [Arabidopsis thaliana] (TAIR:AT1G70950.1)	AT1G23060		5.75175	5.2255	5.62725	6.752	5.15333	5.57333	4.50567	4.94267	4.38367	6.06775	5.07833	yes
254442_at		galactosyltransferase family protein; similar to galactosyltransferase family protein [Arabidopsis thaliana] (TAIR:AT5G62620.1); similar to galactosyltransferase family protein [Arabidopsis thaliana] (TAIR:AT1G74800.1); similar to galactosyltransferase family protein [Arabidopsis thaliana] (TAIR:AT1G27120.1); similar to putative galactosyltransferase family [Sorghum bicolor] (GB:AAL73538.1); simi…	AT4G21060		5.47575	5.93	5.97675	6.751	6.164	5.89567	5.01333	4.945	5.16933	5.78275	6.17467
267143_at		proton-dependent oligopeptide transport (POT) family protein; similar to proton-dependent oligopeptide transport (POT) family protein [Arabidopsis thaliana] (TAIR:AT5G01180.1); similar to TGF-beta receptor, type I/II extracellular re (GB:ABE84933.1); similar to Os03g0823500 [Oryza sativa (japonica cultivar-group)] (GB:NP_001051743.1); contains InterPro domain TGF-beta receptor, type I/II extracel…	AT2G38100		6.12475	5.98675	6.10575	6.75067	4.74633	4.65367	4.75	4.69833	4.795	4.8205	5.179	yes
264750_at		protein kinase family protein; similar to protein kinase family protein [Arabidopsis thaliana] (TAIR:AT1G71410.1); similar to protein kinase family protein-like [Oryza sativa (japonica cultivar-group)] (GB:BAD61275.1); similar to Os01g0616100 [Oryza sativa (japonica cultivar-group)] (GB:NP_001043575.1); contains InterPro domain Serine/threonine protein kinase; (InterPro:IPR002290); contains Inter…	AT1G22870		5.921	5.61575	5.4775	6.749	5.39633	5.465	5.963	5.87	5.43133	5.4665	5.99933	yes
251057_at		oxidoreductase, 2OG-Fe(II) oxygenase family protein; similar to oxidoreductase, 2OG-Fe(II) oxygenase family protein [Arabidopsis thaliana] (TAIR:AT3G14160.1); similar to conserved hypothetical protein [Medicago truncatula] (GB:ABE94528.1); contains InterPro domain 2OG-Fe(II) oxygenase; (InterPro:IPR005123)	AT5G01780		5.51725	5.7835	5.651	6.74867	5.46933	5.48367	5.71867	5.93633	5.867	5.49	5.77467	yes
258530_at		similar to unknown protein [Arabidopsis thaliana] (TAIR:AT5G49170.1)	AT3G06840		5.90725	5.622	5.703	6.74533	5.56267	5.14767	5.812	5.04033	6.17867	6.01075	5.26667
253576_at		pentatricopeptide (PPR) repeat-containing protein; similar to EMB2758 (EMBRYO DEFECTIVE 2758), binding [Arabidopsis thaliana] (TAIR:AT4G33990.1); similar to Tetratricopeptide-like helical [Medicago truncatula] (GB:ABE84706.1); contains InterPro domain Pentatricopeptide repeat; (InterPro:IPR002885); contains InterPro domain Protein prenyltransferase; (InterPro:IPR008940); contains InterPro domain …	AT4G31070		3.87425	3.9825	3.645	6.74467	3.49267	3.393	3.52167	3.53367	3.62067	3.66925	3.66767
264742_at		AAA-type ATPase family protein; similar to AAA-type ATPase family protein [Arabidopsis thaliana] (TAIR:AT1G02890.1); similar to AAA-type ATPase family protein [Arabidopsis thaliana] (TAIR:AT4G24860.1); similar to AAA-type ATPase family protein [Arabidopsis thaliana] (TAIR:AT4G02480.1); similar to Peptidase S1 and S6, chymotrypsin/Hap; Immunoglobulin/major histocompatibility complex; AAA ATPase, c…	AT1G62130		4.968	5.27025	5.028	6.74167	4.551	4.53533	4.337	4.486	4.61233	4.9545	5.607
256777_at		similar to unknown protein [Arabidopsis thaliana] (TAIR:AT4G02720.1); similar to SMAD/FHA [Medicago truncatula] (GB:ABD28514.1); contains InterPro domain SMAD/FHA; (InterPro:IPR008984)	AT3G13780		5.48025	5.47175	5.85375	6.74067	4.44833	4.53433	4.89033	4.72033	4.217	4.45725	4.459	yes
263214_at		toprim domain-containing protein; similar to toprim domain-containing protein [Arabidopsis thaliana] (TAIR:AT1G30680.1); similar to unknown protein [Oryza sativa (japonica cultivar-group)] (GB:BAD46002.1); contains InterPro domain Toprim, primase; (InterPro:IPR006647); contains InterPro domain TOPRIM; (InterPro:IPR006171); contains InterPro domain Toprim subdomain; (InterPro:IPR006154)	AT1G30660		6.32975	6.312	6.43	6.73267	4.552	4.34667	4.48633	4.321	4.54467	4.80325	4.656	yes
264876_at		ARID/BRIGHT DNA-binding domain-containing protein; similar to ARID/BRIGHT DNA-binding domain-containing protein [Arabidopsis thaliana] (TAIR:AT1G76510.2); similar to AT-rich interaction re (GB:ABE82605.1); similar to Os06g0622300 [Oryza sativa (japonica cultivar-group)] (GB:NP_001058097.1); contains InterPro domain HSP20-like chaperone; (InterPro:IPR008978); contains InterPro domain AT-rich inter…	AT2G17410	*	6.1455	5.862	6.17175	6.728	5.59867	5.71633	5.709	5.71267	5.80933	5.8035	5.67433
266208_at	ATIPT2	Encodes tRNA isopentenyltransferase, similar to yeast MOD5.	AT2G27760		5.29225	5.435	5.63975	6.723	5.648	5.61067	5.264	4.95633	5.21767	5.21325	5.046	yes
266593_at		similar to zinc finger (C3HC4-type RING finger) protein-related [Arabidopsis thaliana] (TAIR:AT2G35330.1); similar to programmed cell death 7 [Danio rerio] (GB:NP_001003415.1); similar to Programmed cell death 7 [Danio rerio] (GB:AAH93108.2); similar to Os01g0226500 [Oryza sativa (japonica cultivar-group)] (GB:NP_001042465.1); contains domain Tubulin chaperone cofactor A (SSF46988)	AT2G46200		6.39575	6.35775	6.1915	6.71933	6.059	6.18533	5.67067	5.548	5.34333	5.7245	5.57167
256830_at	AT3G22860.1, TIF3C2	member of eIF3c - eukaryotic initiation factor 3c, member of eIF3c - eukaryotic initiation factor 3c	AT3G22860		5.89775	5.86325	5.45025	6.71633	4.09033	4.03933	4.079	4.13033	4.05733	4.962	4.91167	yes
251849_at	AT3G54610.1, GCN5	Encodes a histone acetyltransferase that is plays a role in the determination of the embryonic root-shoot axis. It is also required to regulate the floral meristem activity by modulating the extent of expression of WUS and AG. In other eukaryotes, this protein is recruited to specific promoters by DNA binding transcription factors and is thought to promote transcription by acetylating the N-termi…	AT3G54610		5.354	5.62625	5.7985	6.71333	6.20067	6.22367	5.638	5.604	5.779	6.20225	5.80533
250156_at		tyrosyl-DNA phosphodiesterase-related; similar to forkhead-associated domain-containing protein / FHA domain-containing protein [Arabidopsis thaliana] (TAIR:AT5G07400.1); similar to Os07g0530100 [Oryza sativa (japonica cultivar-group)] (GB:NP_001059844.1); similar to Forkhead-associated; Tyrosyl-DNA phosphodiesterase [Medicago truncatula] (GB:ABE78603.1); contains InterPro domain SMAD/FHA; (Inter…	AT5G15170		5.09075	5.3505	5.42675	6.708	6.01	6.157	5.37033	5.54867	5.53767	6.10625	5.743	yes
261123_at		pseudogene of pentatricopeptide (PPR) repeat-containing protein	AT1G62860		5.9565	5.63425	5.94975	6.70567	5.82533	5.62233	5.78167	5.8	5.74667	5.74475	5.73267
256476_at					4.13625	3.8485	4.39525	6.70533	3.364	3.28567	3.25367	3.292	3.29433	3.445	3.39167
261544_at		hydroxyproline-rich glycoprotein family protein; similar to unknown protein [Arabidopsis thaliana] (TAIR:AT1G63530.1); similar to Leishmania major strain Friedlin proteophosphoglycan 5 [Leishmania major strain Friedlin] (GB:XP_843163.1)	AT1G63540		5.865	6.1075	5.74975	6.70467	4.37333	4.26133	4.67733	4.76967	4.863	6.2855	6.08567
263515_at		similar to unknown protein [Arabidopsis thaliana] (TAIR:AT3G05570.1); similar to unknown protein [Arabidopsis thaliana] (TAIR:AT4G39235.1); similar to hypothetical protein [Oryza sativa (japonica cultivar-group)] (GB:BAD05323.1); similar to Os03g0724500 [Oryza sativa (japonica cultivar-group)] (GB:NP_001051122.1)	AT2G21640		5.561	5.839	5.5545	6.697	4.965	4.729	5.42167	5.452	6.60333	5.219	5.25033
255649_at		COP1-interacting protein-related; similar to COP1-interacting protein-related [Arabidopsis thaliana] (TAIR:AT2G02770.1); similar to mature parasite-infected erythrocyte surface antigen [Medicago truncatula] (GB:ABE84632.1)	AT4G00920		4.82025	4.6805	5.299	6.69667	3.41367	3.335	3.29267	3.33033	3.35067	3.52275	4.29767	yes
261462_at		fringe-related protein; similar to fringe-related protein [Arabidopsis thaliana] (TAIR:AT4G23490.1); similar to Protein of unknown function DUF604 [Medicago truncatula] (GB:ABE81721.1); contains InterPro domain Protein of unknown function DUF604; (InterPro:IPR006740)	AT1G07850		5.94975	5.66025	5.87375	6.69633	4.01867	4.074	4.22067	4.253	4.57033	4.67975	4.54033
247676_at					4.58725	4.82425	5.16975	6.69467	5.193	5.012	4.781	4.53833	4.56833	5.47125	5.57733
251313_at		pentatricopeptide (PPR) repeat-containing protein; similar to pentatricopeptide (PPR) repeat-containing protein [Arabidopsis thaliana] (TAIR:AT1G02420.1); similar to Os06g0694600 [Oryza sativa (japonica cultivar-group)] (GB:NP_001058444.1); similar to IMP dehydrogenase/GMP reductase [Medicago truncatula] (GB:ABE78833.1); contains InterPro domain Pentatricopeptide repeat; (InterPro:IPR002885); con…	AT3G61360		4.8005	4.7525	4.79425	6.693	4.993	4.77467	4.937	4.782	5.10933	5.53975	5.55533
265301_s_at	AT5G02320.1, MYB3R-5	myb family transcription factor; similar to MYB3R-5 (myb domain protein 3R-5), DNA binding / transcription factor [Arabidopsis thaliana] (TAIR:AT5G02320.1); similar to MYB4 [Malus x domestica] (GB:AAZ20428.1); similar to MYB transcription factor R3 type [Populus tremula x Populus tremuloides] (GB:CAD98760.1); contains InterPro domain Homeodomain-like; (InterPro:IPR009057); contains InterPro domai…	multiple		6.01175	5.72725	6.0955	6.68567	4.24867	4.634	3.69467	3.64267	3.63733	3.44925	3.21367	yes
261280_at		similar to unknown protein [Arabidopsis thaliana] (TAIR:AT2G31600.1); similar to Os05g0304100 [Oryza sativa (japonica cultivar-group)] (GB:NP_001055141.1); similar to expressed protein [Oryza sativa (japonica cultivar-group)] (GB:ABA96319.2)	AT1G05860		5.42175	5.23425	5.3565	6.67833	5.29633	5.356	5.293	5.25367	5.34467	5.29425	5.02033
261302_at		similar to hypothetical protein MtrDRAFT_AC137078g21v1 [Medicago truncatula] (GB:ABE81435.1)	AT1G48580		5.56525	5.466	5.67175	6.67667	4.22967	4.00233	3.68267	3.59067	3.82267	4.2815	4.135	yes
248982_at		aspartyl protease family protein; similar to aspartyl protease family protein [Arabidopsis thaliana] (TAIR:AT4G16563.1); similar to Peptidase aspartic, active site [Medicago truncatula] (GB:ABE80893.1); contains InterPro domain Peptidase A1, pepsin; (InterPro:IPR001461); contains InterPro domain Peptidase aspartic, catalytic; (InterPro:IPR009007)	AT5G45120		6.05475	6.378	6.19525	6.676	4.71267	4.61867	5.137	5.08033	5.127	5.4455	5.69967
267047_at		pentatricopeptide (PPR) repeat-containing protein; similar to pentatricopeptide (PPR) repeat-containing protein [Arabidopsis thaliana] (TAIR:AT1G29710.1); similar to Putative selenium-binding protein, related [Solanum demissum] (GB:AAT66765.1); contains InterPro domain Pentatricopeptide repeat; (InterPro:IPR002885); contains InterPro domain Protein prenyltransferase; (InterPro:IPR008940); contain…	AT2G34370		6.1385	6.141	6.27875	6.673	5.43133	5.37167	5.32633	5.30833	5.47367	5.474	5.38567	yes
266217_at					4.31825	4.1735	4.396	6.67067	3.77067	3.864	4.137	4.11533	3.925	3.78675	3.958
245618_at		similar to unknown protein [Arabidopsis thaliana] (TAIR:AT3G23070.1); similar to Protein of unknown function UPF0044 [Medicago truncatula] (GB:ABE83057.1); similar to CRS1/YhbY domain containing protein, expressed [Oryza sativa (japonica cultivar-group)] (GB:ABA94534.1); contains InterPro domain CRS1/YhbY; (InterPro:IPR001890)	AT4G14510		5.91425	5.9995	5.7025	6.66733	5.78067	5.713	6.15067	6.42833	6.641	6.4435	6.421	yes
246535_at		similar to unknown protein [Arabidopsis thaliana] (TAIR:AT5G15890.1); similar to hypothetical protein [Cleome spinosa] (GB:ABD96865.1); contains InterPro domain Protein of unknown function DUF231, plant; (InterPro:IPR004253)	AT5G15900		4.97425	5.131	5.288	6.663	4.9	5.053	4.30667	4.433	5.205	3.88525	4.25733
248965_at		nodulin-related / integral membrane family protein; similar to integral membrane family protein [Arabidopsis thaliana] (TAIR:AT4G19185.1); similar to Protein of unknown function DUF6, transmembrane [Medicago truncatula] (GB:ABE84659.1); contains InterPro domain Protein of unknown function DUF6, transmembrane; (InterPro:IPR000620)	AT5G45370		5.52075	5.762	5.60375	6.66133	6.00433	5.82867	5.763	5.65467	5.78867	5.505	5.90033
254581_at		pentatricopeptide (PPR) repeat-containing protein; similar to pentatricopeptide (PPR) repeat-containing protein [Arabidopsis thaliana] (TAIR:AT5G55840.1); similar to Os07g0300200 [Oryza sativa (japonica cultivar-group)] (GB:NP_001059422.1); similar to Os08g0290000 [Oryza sativa (japonica cultivar-group)] (GB:NP_001061460.1); similar to fertility restorer homologue [Raphanus sativus] (GB:CAD61286.…	AT4G19440		5.88	5.87525	5.72475	6.65233	4.44433	4.41567	4.399	4.33433	4.28067	4.49175	4.557	yes
262862_at		aspartyl protease family protein; similar to CDR1 (CONSTITUTIVE DISEASE RESISTANCE 1), aspartic-type endopeptidase/ pepsin A [Arabidopsis thaliana] (TAIR:AT5G33340.1); similar to Eukaryotic aspartyl protease, putative [Medicago truncatula] (GB:ABE90750.1); contains InterPro domain Peptidase A1, pepsin; (InterPro:IPR001461); contains InterPro domain Peptidase aspartic, catalytic; (InterPro:IPR0090…	AT1G64830		6.4485	6.42375	6.41475	6.65233	4.86	4.86	5.257	5.363	5.34267	5.6225	5.84367	yes
253365_at		pentatricopeptide (PPR) repeat-containing protein; similar to pentatricopeptide (PPR) repeat-containing protein [Arabidopsis thaliana] (TAIR:AT5G09950.1); similar to Tetratricopeptide-like helical [Medicago truncatula] (GB:ABE81759.1); contains InterPro domain Pentatricopeptide repeat; (InterPro:IPR002885); contains InterPro domain Protein prenyltransferase; (InterPro:IPR008940); contains InterPr…	AT4G33170		5.71925	5.90775	5.69425	6.64867	4.57967	4.60133	4.357	4.499	4.69067	4.933	5.038	yes
252431_at	AT3G47700.1	Involved in transportation of seed storage proteins from the ER to the vacuole. Mutant seed cell accumulates the precursors of 12S globulin and 2S albumin instead of the vacuolar-located mature proteins.	AT3G47700		5.2995	5.434	5.3545	6.644	6.288	6.286	5.631	5.756	5.569	5.7405	5.64367
